# Supplementary material for: Proteomics of Fusarium oxysporum Race 1 and Race 4 Reveals Enzymes Involved in Carbohydrate Metabolism and Ion Transport That Might Play Important Roles in Banana Fusarium Wilt
Source: PLoS One. 2014 Dec 2;9(12):e113818. doi: 10.1371/journal.pone.0113818 (PMC4252058; doi:10.1371/journal.pone.0113818)
Supplement: Data S5 — Primers and RT-PCR results for 15 typical genes. (XLS) [file pone.0113818.s005.xls]

## Sheet: Primers and RT PCR results
Spot No.	Accession No.	Protein name	Species	Protein No.	Gene name	Prime-3	Prime-5	Repeat-1	Repeat-2	Repeat-3	Repeat-4
Actin as internal control	gi|396085015	Actin	Fusarium oxysporum f. cubense	JQ965663.1	actin	TACTATTGGTAACGAGCGATTCCG	CATTTGCTGGAAAGTGGACAGG
2	gi|342881721	amidotransferase	Fusarium oxysporum Fo5176	EGU82553.1	FOXB_06919	GAGACCTCCATCAAGCTCATCG	ACAGCCTCCTCCTCAGAGTTGC
3	gi|475667672	Adenosine kinase	Fusarium oxysporum f. sp. cubense race 4	EMT65461.1	FOC4_g10011447	TCCTAAACAACTACGATGCCAAGC	CGGTATTCAACACGGAGACCAG
4	gi|342888721	NADP-dependent glycerol dehydrogenase	Fusarium oxysporum Fo5176	EGU87947.1	FOXB_01538	AGGTCCGCTCCATTGGTGTCT	GCAGAGTAGGCGGTCAGGTAGA
7	gi|475667960	Phosphoglycerate kinase	Fusarium oxysporum f. sp. cubense race 4	EMT65748.1	FOC4_g10007859	CTCATCGAGACCCTTACTGCTCTC	GAGGATGAGGTTGAGCTTCTTGTTG
10	gi|342888261	mitochondrial peroxiredoxin PRX1	Fusarium oxysporum Fo5176	EGU87626.1	FOXB_01911	CGAGACCACAAAGGGCAAGAT	CGGTAACCTCACCAATATCCTTG
17	gi|342878892	serine carboxypeptidase S28	Fusarium oxysporum Fo5176	EGU80177.1	FOXB_09306	GGCATCTCCTCTTCTGGTGTCA	GGTCCCAGTTGTTGCCTTGC
19	gi|477517374	homoserine dehydrogenase	Fusarium oxysporum f. sp. cubense race 1	ENH69623.1	FOC1_g10011979	GGATGTTGCGGAACTTTACCCT	CTTCTTGACCTCCTCAGACCACTTG
20	gi|475671099	glutathione reductase	Fusarium oxysporum f. sp. cubense race 4	EMT68452.1	FOC4_g10012869	TCTGGGCTATTGGTCGCACTC	GGTGGGAGAAGACAACCGAGG
24	gi|342882947	vacuolar protease A	Fusarium oxysporum Fo5176	EGU83511.1	FOXB_05921	CTTCTGGATGAGCCCGTCTTTG	TTGTAGCCCTTCTTAGCACCAATCT
62	gi|283806340	predicted GMC oxidoreductase	Fusarium oxysporum	BAI66412.1	ODX1	TCTCGGCTACTCATACACGACAAC	GTGACTGGAAAGCTCCACCACT
79	gi|475673339	Chitinase 1	Fusarium oxysporum f. sp. cubense race 4	EMT70450.1	FOC4_g10008900	CGAGACCACAAAGGGCAAGAT	GCCGGTAACCTCACCAATATCC
80	gi|475672613	Alpha-galactosidase 2	Fusarium oxysporum f. sp. cubense race 4	EMT69768.1	FOC4_g10000893	TCAAGTGGGATAACAACCGTGG	GCATCTGTATCATCCGATGTCCAG
81	gi|475668007	Amidase Family Protein	Fusarium oxysporum f. sp. cubense race 4	EMT65795.1	FOC4_g10007906	CCTAAGCAGTCCAAGAATGAGCC	CATCTCTGTAAAAGTAGCCTCCTCAAG
82	gi|477517233	l-amino acid oxidase	Fusarium oxysporum f. sp. cubense race 1	ENH69482.1	FOC1_g10011838	CAGAGATGGGTCCGATGAGATTG	CCAGGCAATAAGCTCATTAGGATG
85	gi|475670597	Carboxypeptidase cpdS	Fusarium oxysporum f. sp. cubense race 4	EMT67950.1	FOC4_g10012346	CGAACCCTTGCTTCAACATTTATC	GGTCGCCGAAGCCAAAGAC
