# Supplementary material for: Proteomics of Fusarium oxysporum Race 1 and Race 4 Reveals Enzymes Involved in Carbohydrate Metabolism and Ion Transport That Might Play Important Roles in Banana Fusarium Wilt
Source: PubMed Central journal article supplement (PMC4252058; doi:10.1371/journal.pone.0113818), 2014-12-02
Supplement: pone.0113818.s001.pdf [file pone.0113818.s001.pdf]

1 **Suppl Data 1 Table 1** Proteins identified by MS/MS from F1 and F4

| Spot No. <sup>a</sup>                                                     | NCBI No. <sup>b</sup> | Function Category<br>Protein name | Fungal species      | Exper. <sup>c</sup><br><i>pI/Mr</i> | Theor. <sup>d</sup><br><i>pI/Mr</i> | MP<br>/TP <sup>e</sup> | SC%<br>(Loc) <sup>f</sup> | MS.<br>S. <sup>g</sup> | Change<br>(F1, F4) <sup>h</sup> |
|---------------------------------------------------------------------------|-----------------------|-----------------------------------|---------------------|-------------------------------------|-------------------------------------|------------------------|---------------------------|------------------------|---------------------------------|
| <b>Carbohydrate transport and metabolism (CTM)</b>                        |                       |                                   |                     |                                     |                                     |                        |                           |                        |                                 |
| 3                                                                         | 475667672             | adenosine kinase                  | <i>F. oxysporum</i> | 5.47/33.3                           | 5.34/38.1                           | 15/62                  | 59(⊖)                     | 143                    |                                 |
| 7                                                                         | 475667960             | phospho-kinase                    | <i>F. oxysporum</i> | 5.8/48.3                            | 5.77/44.8                           | 18/72                  | 56(⊖)                     | 90                     |                                 |
| 9                                                                         | 475673861             | fructose-aldolase                 | <i>F. oxysporum</i> | 5.74/36.2                           | 5.44/39.8                           | 17/49                  | 51(⊖)                     | 170                    |                                 |
| 12                                                                        | 477513214             | beta-hexosaminidase               | <i>F. oxysporum</i> | 6.73/35.3                           | 6.25/34.2                           | 11/69                  | 29(*)                     | 83                     |                                 |
| 13                                                                        | 475667960             | Phospho-kinase                    | <i>F. oxysporum</i> | 5.92/44.4                           | 5.77/44.8                           | 16/111                 | 48(⊖)                     | 76                     |                                 |
| 16                                                                        | 3810873               | lactonohydrolase                  | <i>F. oxysporum</i> | 5.32/50.2                           | 5.10/43.2                           | 10/60                  | 31(⊖)                     | 78                     |                                 |
| 22                                                                        | 475668982             | putative enolase                  | <i>F. oxysporum</i> | 5.20/48.4                           | 5.06/47.5                           | 22/77                  | 57(*)                     | 129                    |                                 |
| 31                                                                        | 475667960             | Phospho-kinase                    | <i>F. oxysporum</i> | 5.80/46.3                           | 5.77/44.8                           | 21/59                  | 57(⊖)                     | 159                    |                                 |
| 33                                                                        | 475668458             | glucanosyltransferase             | <i>F. oxysporum</i> | 4.72/62.5                           | 4.83/59.2                           | 22/77                  | 44(*)                     | 132                    |                                 |
| 34                                                                        | 475668458             | glucanosyltransferase             | <i>F. oxysporum</i> | 4.80/60.3                           | 4.87/59.1                           | 19/79                  | 42(*)                     | 92                     |                                 |
| 35                                                                        | 477513214             | beta-hexosaminidase               | <i>F. oxysporum</i> | 6.80/37.7                           | 6.25/34.2                           | (1)                    | 4(*)                      | (93)                   |                                 |
| 36                                                                        | 475667960             | phospho-kinase                    | <i>F. oxysporum</i> | 5.92/47.4                           | 5.77/44.8                           | 20/56                  | 55(⊖)                     | 162                    |                                 |
| 41                                                                        | 342888171             | carboxy-cyclase                   | <i>F. oxysporum</i> | 6.71/46.3                           | 6.67/42.4                           | 14/58                  | 43(S)                     | 88                     |                                 |
| 42                                                                        | 475672613             | Alpha-galactosidase               | <i>F. oxysporum</i> | 4.6/84.32                           | 5.01/83.1                           | 18/65                  | 29(S)                     | 80                     |                                 |
| 43                                                                        | 475672613             | alpha-galactosidase               | <i>F. oxysporum</i> | 4.80/84.3                           | 5.01/83.1                           | 24/79                  | 36(S)                     | 113                    |                                 |
| 50                                                                        | 475668982             | putative enolase                  | <i>F. oxysporum</i> | 4.80/47.7                           | 5.06/47.5                           | 17/63                  | 38(*)                     | 80                     |                                 |
| 51                                                                        | 477507289             | acethexosaminidase                | <i>F. oxysporum</i> | 5.5/77.3                            | 5.22/66.1                           | 24/51                  | 48(S)                     | 216                    |                                 |
| 53                                                                        | 475668458             | glucanosyltransferase             | <i>F. oxysporum</i> | 5.12/70.2                           | 4.83/59.2                           | 15/62                  | 29(*)                     | 76                     |                                 |
| 58                                                                        | 477514377             | alpha-galactosidase               | <i>F. oxysporum</i> | 4.7/84.3                            | 5.13/82.9                           | 15/50                  | 27(S)                     | 77                     |                                 |
| 60                                                                        | 475673339             | Chitinase 1                       | <i>F. oxysporum</i> | 6.8/62.3                            | 6.31/47.9                           | 16/66                  | 36(S)                     | 93                     |                                 |
| 64                                                                        | 3810873               | lactonohydrolase                  | <i>F. oxysporum</i> | 5.3/65.65                           | 5.10/43.2                           | 11/58                  | 31(⊖)                     | 75                     |                                 |
| 68                                                                        | 475668458             | glucanosyltransferase             | <i>F. oxysporum</i> | 4.9/67.2                            | 4.83/59.2                           | 26/86                  | 52(*)                     | 144                    |                                 |
| 76                                                                        | 342872804             | phospholipase B                   | <i>F. oxysporum</i> | 4.67/77.4                           | 4.67/70.5                           | 15/57                  | 25(S)                     | 85                     |                                 |
| 77                                                                        | 342872804             | phospholipase B                   | <i>F. oxysporum</i> | 4.75/77.4                           | 4.67/70.5                           | (4)                    | 8(S)                      | 253                    |                                 |
| 78                                                                        | 342872804             | phospholipase B                   | <i>F. oxysporum</i> | 4.50/77.4                           | 4.67/70.5                           | (2)                    | 2(S)                      | (80)                   |                                 |
| 79                                                                        | 475673339             | Chitinase 1                       | <i>F. oxysporum</i> | 6.9/55.3                            | 6.31/47.9                           | 18/55                  | 39(S)                     | 101                    |                                 |
| 80                                                                        | 475672613             | galactosidase                     | <i>F. oxysporum</i> | 5.1/84.3                            | 5.01/83.1                           | 35/67                  | 47(S)                     | 211                    |                                 |
| 83                                                                        | 475672613             | galactosidase                     | <i>F. oxysporum</i> | 5.1/84.3                            | 5.01/83.1                           | 27/62                  | 35(S)                     | 150                    |                                 |
| 98                                                                        | 477513214             | hexosaminidase                    | <i>F. oxysporum</i> | 6.7/37.65                           | 6.25/34.2                           | 12/64                  | 31(*)                     | 83                     |                                 |
| 99                                                                        | 475666766             | Glucose-epimerase                 | <i>F. oxysporum</i> | 4.62/35.4                           | 4.95/33.7                           | 10/60                  | 46(*)                     | 83                     |                                 |
| <b>Posttranslational modification, protein turnover, chaperones (PTM)</b> |                       |                                   |                     |                                     |                                     |                        |                           |                        |                                 |
| 10                                                                        | 342888261             | peroxiredoxin                     | <i>F. oxysporum</i> | 6.17/20.3                           | 5.86/25.4                           | 15/71                  | 71(*)                     | 122                    |                                 |
| 17                                                                        | 342878892             | carboxypeptidase                  | <i>F. oxysporum</i> | 6.20/62.3                           | 6.04/59.9                           | 21/70                  | 41(*)                     | 135                    |                                 |
| 21                                                                        | 475663822             | Hsp 70                            | <i>F. oxysporum</i> | 5.04/73.2                           | 5.00/70.9                           | 23/70                  | 44(⊖)                     | 142                    |                                 |
| 23                                                                        | 342882947             | vacuolar protease A               | <i>F. oxysporum</i> | 4.45/44.7                           | 4.66/42.9                           | (6)                    | 10(S)                     | 218                    |                                 |
| 24                                                                        | 342882947             | vacuolar protease A               | <i>F. oxysporum</i> | 4.38/44.7                           | 4.66/42.9                           | 9/39                   | 21(S)                     | 95                     |                                 |
| 29                                                                        | 342882947             | vacuolar protease A               | <i>F. oxysporum</i> | 4.38/44.7                           | 4.66/42.9                           | 8/49                   | 19(S)                     | 84                     |                                 |
| 32                                                                        | 475667235             | elongation factor 1               | <i>F. oxysporum</i> | 5.90/48.5                           | 5.64/46.2                           | 19/72                  | 51(*)                     | 123                    |                                 |
| 45                                                                        | 342876003             | disulfide isomerase               | <i>F. oxysporum</i> | 6.8/39.4                            | 6.29/42.1                           | 21/81                  | 60(S)                     | 148                    |                                 |

|    |           |                  |                     |           |           |       |       |      |  |
|----|-----------|------------------|---------------------|-----------|-----------|-------|-------|------|--|
| 47 | 170098594 | ubiquitin        | <i>L. bicolor</i>   | 6.3/9.7   | 5.71/8.2  | 7/61  | 84(_) | 81   |  |
| 54 | 607818    | Hsp 70           | <i>N. crassa</i>    | 4.90/48.7 | 5.03/70.8 | (3)   | 5(_)  | (83) |  |
| 56 | 475674506 | Peroxiredoxin-1  | <i>F. oxysporum</i> | 4.96/23.5 | 5.14/23.3 | (4)   | 14(*) | 127  |  |
| 59 | 475664853 | Carboxypeptidase | <i>F. oxysporum</i> | 7.0/70.3  | 6.71/57.5 | (1)   | 2(_)  | (62) |  |
| 70 | 477507989 | Hsp 70           | <i>F. oxysporum</i> | 6.1/83.2  | 5.00/71.1 | 25/46 | 53(_) | 217  |  |
| 71 | 342889878 | Hsp 90           | <i>F. oxysporum</i> | 5.0/70.3  | 4.85/79.3 | 26/67 | 41(_) | 174  |  |
| 73 | 477507989 | Hsp 70           | <i>F. oxysporum</i> | 5.0/70.3  | 5.00/71.2 | 21/61 | 26(_) | 117  |  |
| 74 | 342889878 | Hsp 90           | <i>F. oxysporum</i> | 5.0/78.7  | 4.85/79.3 | 19/59 | 34(_) | 110  |  |
| 85 | 475670597 | Carboxypeptidase | <i>F. oxysporum</i> | 5.45/68.3 | 5.94/64.9 | 14/58 | 29(S) | 78   |  |
| 94 | 322700250 | Hsp 90           | <i>M. acridum</i>   | 4.74/24.2 | 4.93/80.1 | 13/52 | 26(_) | 88   |  |

### Inorganic ion transport and metabolism (ITM)

|    |           |                      |                     |           |           |       |       |     |  |
|----|-----------|----------------------|---------------------|-----------|-----------|-------|-------|-----|--|
| 5  | 475672437 | Catalase-peroxidase  | <i>F. oxysporum</i> | 6.80/80.2 | 6.57/85.2 | 29/71 | 37(S) | 147 |  |
| 6  | 477512799 | superoxide dismutase | <i>F. oxysporum</i> | 6.15/16.6 | 7.07/21.3 | 11/78 | 67(S) | 95  |  |
| 15 | 477512799 | superoxide dismutase | <i>F. oxysporum</i> | 6.7/17.2  | 7.07/21.3 | 12/53 | 51(S) | 106 |  |
| 28 | 477512799 | superoxide dismutase | <i>F. oxysporum</i> | 6.41/22.3 | 7.07/21.3 | 10/59 | 55(S) | 122 |  |
| 65 | 475671755 | Catalase-peroxidase  | <i>F. oxysporum</i> | 6.5/85.3  | 5.98/73.3 | 19/51 | 39(_) | 126 |  |
| 86 | 475672437 | Catalase-peroxidase  | <i>F. oxysporum</i> | 6.8/78.3  | 6.57/85.2 | 33/64 | 42(S) | 216 |  |
| 87 | 475672437 | Catalase-peroxidase  | <i>F. oxysporum</i> | 6.7/78.3  | 6.57/85.2 | 37/84 | 41(S) | 219 |  |
| 88 | 475672437 | Catalase-peroxidase  | <i>F. oxysporum</i> | 6.9/78.3  | 6.57/85.2 | 39/92 | 49(S) | 249 |  |
| 89 | 475672437 | Catalase-peroxidase  | <i>F. oxysporum</i> | 6.79/78.3 | 6.57/85.2 | 39/61 | 48(S) | 314 |  |
| 90 | 475672437 | Catalase-peroxidase  | <i>F. oxysporum</i> | 6.71/78.3 | 6.57/85.2 | 33/61 | 42(S) | 236 |  |
| 92 | 475672437 | Catalase-peroxidase  | <i>F. oxysporum</i> | 6.69/78.3 | 6.57/85.2 | 41/87 | 49(S) | 250 |  |

### Amino acid transport and metabolism (ATM)

|    |           |                      |                       |           |           |       |       |      |  |
|----|-----------|----------------------|-----------------------|-----------|-----------|-------|-------|------|--|
| 18 | 475675629 | Acetyl-lyase         | <i>F. oxysporum</i>   | 6.50/44.4 | 5.89/47.1 | 13/52 | 42(_) | 88   |  |
| 19 | 477517374 | hom-dehydrogenase    | <i>F. oxysporum</i>   | 6.14/38.1 | 6.24/38.6 | 12/38 | 50(*) | 104  |  |
| 26 | 46128717  | peptidase            | <i>F. graminearum</i> | 5.15/22.3 | 5.53/55.4 | (2)   | 2(_)  | (92) |  |
| 39 | 477517233 | l-amino acid oxidase | <i>F. oxysporum</i>   | 6.2/73.5  | 5.69/67.8 | 17/46 | 24(S) | 90   |  |
| 63 | 475675629 | Acetyl-lyase         | <i>F. oxysporum</i>   | 6.54/58.7 | 5.89/47.1 | 15/35 | 57(_) | 134  |  |
| 82 | 477517233 | l-amino acid oxidase | <i>F. oxysporum</i>   | 6.5/80.7  | 5.69/67.8 | 23/83 | 35(S) | 98   |  |
| 84 | 477517233 | l-amino acid oxidase | <i>F. oxysporum</i>   | 6.2/80.6  | 5.69/67.8 | 19/60 | 25(S) | 82   |  |
| 91 | 477517233 | l-amino acid oxidase | <i>F. oxysporum</i>   | 6.14/80.7 | 5.69/67.8 | 19/64 | 26(S) | 86   |  |
| 93 | 342871725 | l-amino acid oxidase | <i>F. oxysporum</i>   | 6.14/80.7 | 5.69/67.8 | 18/69 | 27(S) | 81   |  |

### Energy production and conversion (EPC)

|    |           |                       |                       |           |           |       |       |     |  |
|----|-----------|-----------------------|-----------------------|-----------|-----------|-------|-------|-----|--|
| 20 | 475671099 | glutathione reductase | <i>F. oxysporum</i>   | 6.64/53.4 | 6.06/51.1 | 19/76 | 67(_) | 121 |  |
| 38 | 475664589 | ATP synthase          | <i>F. oxysporum</i>   | 6.7/20.3  | 5.27/55.2 | 30/68 | 71(M) | 206 |  |
| 40 | 475664589 | ATP synthase          | <i>F. oxysporum</i>   | 4.76/54.3 | 5.27/55.2 | 24/84 | 64(M) | 128 |  |
| 46 | 475664589 | ATP synthase          | <i>F. oxysporum</i>   | 4.95/54.3 | 5.27/55.2 | 28/71 | 68(M) | 168 |  |
| 49 | 475664589 | ATP synthase          | <i>F. oxysporum</i>   | 4.75/26.5 | 5.27/55.2 | (2)   | 5(M)  | 117 |  |
| 67 | 354543047 | hypothetical protein  | <i>C. parapilosis</i> | 4.7/18.3  | 10.1/23.1 | 9/80  | 38(_) | 80  |  |
| 75 | 342876053 | ATP synthase D chain  | <i>F. oxysporum</i>   | 4.55/84.3 | 6.43/19.4 | 10/59 | 60(*) | 98  |  |

### Coenzyme metabolism (COM)

|    |           |                     |                     |           |           |       |       |     |  |
|----|-----------|---------------------|---------------------|-----------|-----------|-------|-------|-----|--|
| 8  | 475664008 | thionine synthetase | <i>F. oxysporum</i> | 5.92/45.6 | 5.77/44.5 | 16/65 | 55(*) | 90  |  |
| 11 | 475664008 | thionine synthetase | <i>F. oxysporum</i> | 6.05/41.3 | 5.77/44.5 | 14/49 | 48(_) | 130 |  |
| 37 | 342873590 | Adenosyl-cysteinase | <i>F. oxysporum</i> | 5.74/46.2 | 5.57/49.5 | 28/85 | 57(*) | 191 |  |

**DNA replication, recombination and repair (DRR)**

|    |           |                       |                     |          |           |       |       |     |  |
|----|-----------|-----------------------|---------------------|----------|-----------|-------|-------|-----|--|
| 55 | 342881318 | actin binding protein | <i>F. oxysporum</i> | 4.9/22.7 | 4.84/18.8 | 16/86 | 69( ) | 109 |  |
| 66 | 342890194 | DEAD box helicase     | <i>F. oxysporum</i> | 5.2/57.5 | 4.98/44.9 | 21/68 | 55( ) | 119 |  |

**Transcription, translation, ribosomal structure and biogenesis (TRR)**

|    |           |                |                     |          |           |       |       |     |  |
|----|-----------|----------------|---------------------|----------|-----------|-------|-------|-----|--|
| 14 | 477513214 | hexosaminidase | <i>F. oxysporum</i> | 6.5/26.3 | 6.25/34.2 | 10/68 | 26( ) | 80  |  |
| 81 | 475668007 | amidase        | <i>F. oxysporum</i> | 6.5/64.3 | 6.86/63.7 | 18/64 | 39(S) | 112 |  |

**Cell motility and secretion (CMS)**

|    |           |                |                     |          |           |      |       |    |  |
|----|-----------|----------------|---------------------|----------|-----------|------|-------|----|--|
| 62 | 283806340 | oxidoreductase | <i>F. oxysporum</i> | 5.5/73.2 | 5.20/71.4 | 9/24 | 27(S) | 83 |  |
|----|-----------|----------------|---------------------|----------|-----------|------|-------|----|--|

**General function prediction only (Predicted)**

|    |           |                      |                     |           |           |       |       |     |  |
|----|-----------|----------------------|---------------------|-----------|-----------|-------|-------|-----|--|
| 2  | 342881721 | amidotransferase     | <i>F. oxysporum</i> | 5.35/25.3 | 5.12/24.5 | 18/35 | 74(*) | 165 |  |
| 4  | 342888721 | Glycer-dehydrogenase | <i>F. oxysporum</i> | 6.25/37.5 | 5.91/37.4 | 18/43 | 53(*) | 157 |  |
| 25 | 342888721 | Glycer-dehydrogenase | <i>F. oxysporum</i> | 6.1/36.5  | 5.91/37.4 | 20/75 | 59(*) | 137 |  |
| 27 | 342888721 | Glycer-dehydrogenase | <i>F. oxysporum</i> | 6.21/36.5 | 5.91/37.4 | 23/47 | 61(*) | 208 |  |
| 44 | 342878413 | Quin-oxidoreductase  | <i>F. oxysporum</i> | 5.60/18.7 | 5.54/21.7 | (5)   | 18( ) | 163 |  |
| 52 | 342879444 | Nitropro-dioxygenase | <i>F. oxysporum</i> | 6.6/50.3  | 5.78/36.9 | 18/61 | 54(*) | 136 |  |

**NO related COG (NO)**

|    |           |                      |                     |           |           |       |       |     |  |
|----|-----------|----------------------|---------------------|-----------|-----------|-------|-------|-----|--|
| 1  | 475667056 | hypothetical protein | <i>F. oxysporum</i> | 6.24/51.3 | 6.62/50.5 | 16/64 | 37(S) | 96  |  |
| 30 | 475667318 | actin                | <i>F. oxysporum</i> | 5.45/44.3 | 6.08/45.2 | 19/62 | 53( ) | 119 |  |
| 48 | 342873137 | transport factor 2   | <i>V. dahliae</i>   | 4.50/14.4 | 4.61/13.9 | (2)   | 12( ) | 166 |  |
| 57 | 340924179 | hypothetical protein | <i>C. therhilum</i> | 5.10/54.4 | 10.6/17.9 | 9/66  | 51( ) | 79  |  |
| 61 | 171680085 | hypothetical protein | <i>P. anserina</i>  | 4.8/77.4  | 5.61/41.3 | 10/24 | 34(*) | 81  |  |
| 69 | 342872822 | Phospho-mutase       | <i>F. oxysporum</i> | 5.3/14.3  | 5.21/12.4 | 8/61  | 70( ) | 91  |  |
| 95 | 475667056 | hypothetical protein | <i>F. oxysporum</i> | 6.06/50.5 | 6.62/50.5 | 17/72 | 38(S) | 110 |  |
| 96 | 475671883 | Ribonuclease Trv     | <i>F. oxysporum</i> | 5.95/31.3 | 5.61/29.7 | (3)   | 13(S) | 185 |  |
| 97 | 477507337 | 14-3-3 protein       | <i>F. oxysporum</i> | 4.85/34.1 | 4.87/30.1 | 13/60 | 61( ) | 92  |  |

2

3 Note:

4 <sup>a</sup>Assigned spot number as indicated in Fig. 2.5 <sup>b</sup>NCBI non-redundant database accession numbers.6 <sup>c</sup>Experimental [molecular mass (kDa) OR relative molecular mass (Mr)] and pI of  
7 identified proteins.8 <sup>d</sup>Theoretical [molecular mass (kDa) OR relative molecular mass (Mr)] and pI of  
9 identified proteins.10 <sup>e</sup>Number of matched peptides (MP) with PMF and the total searched peptides (TP).  
11 Numbers in parentheses are the MP based on MS/MS.12 <sup>f</sup>The amino acid sequence coverage (SC) for the identified proteins and the protein  
13 location (Loc) predicted by TargetP. "M" represent the protein located at mitochondria,  
14 "S" represent the protein has signal peptidase, "\_" represent the protein have multiple  
15 location, "\*" represent the location of proteins was unknown.16 <sup>g</sup>The Mascot searched score (MS) against the NCBI non-redundant database. The  
17 numbers in parentheses represent the protein was identified by MS/MS.18 <sup>h</sup>The mean relative protein values on 2-DE gels. White, F1; black, F4.

19
