# Supplementary material for: Proteomics of Fusarium oxysporum Race 1 and Race 4 Reveals Enzymes Involved in Carbohydrate Metabolism and Ion Transport That Might Play Important Roles in Banana Fusarium Wilt
Source: PubMed Central journal article supplement (PMC4252058; doi:10.1371/journal.pone.0113818), 2014-12-02
Supplement: pone.0113818.s003.pdf [file pone.0113818.s003.pdf]

## **Supplemental spectra and MALDI TOF/TOF MS/MS identification information**

**Annotated spectra for Suppl Data 1: 99 proteins identified  
by MALDI TOF MS and MALDI TOF/TOF MS/MS.**

Spot numbers of the 99 proteins correspond to the proteins that  
listed in Suppl Data 1.

**CID:** collision induced dissociation

**MALDI TOF:**

matrix assisted laser desorption/ionization time of flight

**MS:** mass spectrometry

**PMF:** peptide mass fingerprinting

Spot No.: 1

Mascot score: 96

Species: *Fusarium oxysporum f. sp. cubense race 4*

Protein name: hypothetical protein FOC4\_g10007540

NCBI accession No.: gi| 475667056 Sequence coverage %: 37

Matched peptides No.: 16

Total peptides No.: 64

Calculated Mr: 50542

Calculated pI: 6.62

### Annotated PMF spectra:

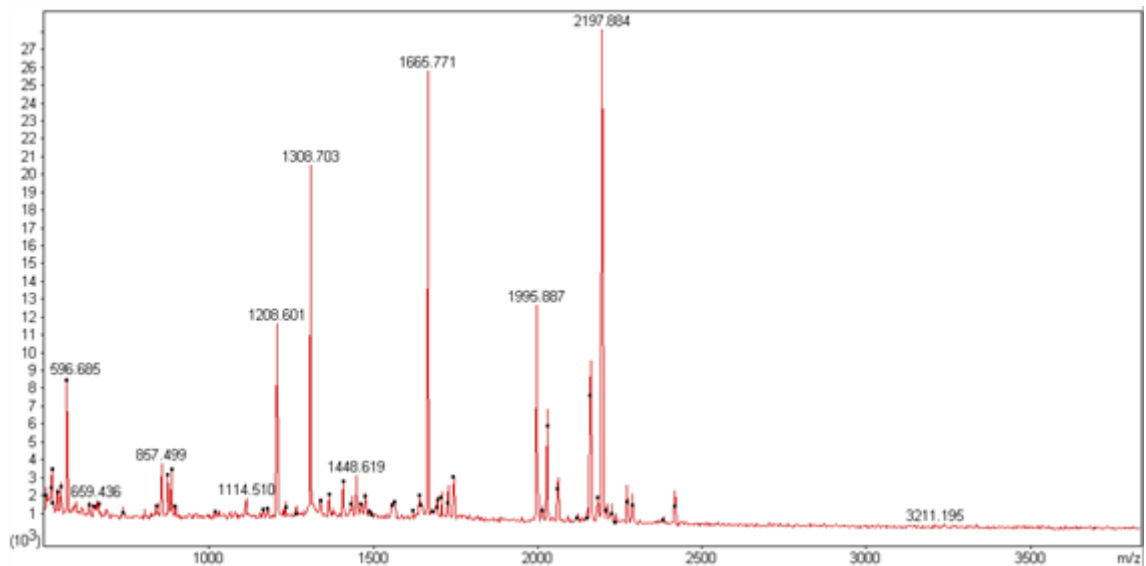

### PMF Searched Score:

Protein score is  $-10 \cdot \log(P)$ , where P is the probability that the observed match is a random event. Protein scores greater than 75 are significant ( $p < 0.05$ ).

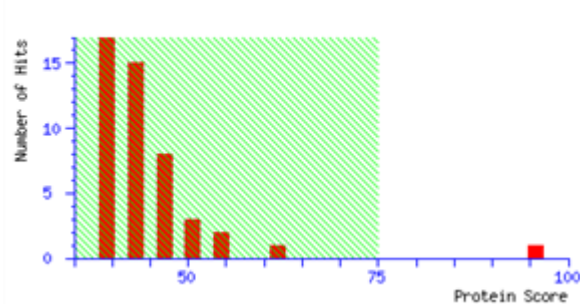

Matched peptide sequences: shown in **Bold Red**

```

1  MVSSKLLFLA VIAAVQAIDV DVAVVGGGGS GGYAAVQLRE NYGKKIVVIE
51 KQKQLGGHAQ SWYDPVTGKA YNYGVDAFTN ITVSIIDFFKQ LKVPIGPVQS
101 EQVRNLYVDF KDGKTVDYTP PTTKEAADAM GNYRDQWLKY TDILLPTSEN
151 FPRGDKVPSD LLLSWYEFAR KYKAEAAAPS IWDTVVVDLN TALMIDVWKA
201 WNPSVGSFQP ASGDNTEIWQ KAAKVLGKDV LYESEVVSAK RSKSGVKLQV
251 RDKDGQVINI NAKRLITIG PETINPKYFD LNSEELEVFH SAAGNRYYTG
301 IVSHPSLPAA EITNIVPAAI NENYLAYPTV PFQAYFHYKG NSSTGPIHRA
351 LAIVPRDTSI EDAKDLIRKS LQNLIDAGTI PAGNSTDLDF RTFSDHGLLY
401 RRWSADQLRG GIFAKANALQ GQRSTWYTGA FWMNNDCVML WNTTNAILKE
451 MLKDI

```

Matched peptides information:

| Start - End | Observed  | Mr(expt)  | Mr(calc)  | ppm   | M | Peptide                    |
|-------------|-----------|-----------|-----------|-------|---|----------------------------|
| 54 - 69     | 1743.7194 | 1742.7121 | 1742.8376 | -72.0 | 0 | K.QLGGHAQSWYDPVTGK.A       |
| 93 - 104    | 1308.7033 | 1307.6960 | 1307.7198 | -18.1 | 0 | K.VPIGPVQSEQVR.N           |
| 105 - 111   | 898.4591  | 897.4519  | 897.4596  | -8.63 | 0 | R.NLYVDFK.D                |
| 140 - 153   | 1665.7714 | 1664.7641 | 1664.8410 | -46.2 | 0 | K.YTDILLPTSENFPFR.G        |
| 154 - 170   | 1995.8870 | 1994.8797 | 1995.0102 | -65.4 | 1 | R.GDKVPSDLLLSWYEFAR.K      |
| 157 - 170   | 1695.7644 | 1694.7571 | 1694.8668 | -64.7 | 0 | K.VPSDLLLSWYEFAR.K         |
| 200 - 221   | 2418.9644 | 2417.9571 | 2418.1240 | -69.0 | 0 | K.AWNPSVGSFQPASGDNTEIWQK.A |
| 229 - 240   | 1338.6190 | 1337.6117 | 1337.6714 | -44.6 | 0 | K.DVLYESEVVSAR.R           |
| 264 - 277   | 1564.8337 | 1563.8264 | 1563.9348 | -69.3 | 1 | K.RLLITIGPETINPK.Y         |
| 265 - 277   | 1408.7512 | 1407.7439 | 1407.8337 | -63.8 | 0 | R.LLITIGPETINPK.Y          |
| 278 - 296   | 2197.8838 | 2196.8765 | 2197.0076 | -59.7 | 0 | K.YFDLNSEELEVFHSAAGNR.Y    |
| 350 - 356   | 739.4868  | 738.4795  | 738.4752  | 5.86  | 0 | R.ALAIVPR.D                |
| 392 - 401   | 1208.6008 | 1207.5935 | 1207.5986 | -4.18 | 0 | R.TFSDHGLLYR.R             |
| 403 - 409   | 875.4877  | 874.4804  | 874.4297  | 58.0  | 0 | R.WSADQLR.G                |
| 403 - 415   | 1448.6193 | 1447.6120 | 1447.7572 | -100  | 1 | R.WSADQLRGGIFAK.A          |
| 416 - 423   | 857.4987  | 856.4914  | 856.4515  | 46.6  | 0 | K.ANALQGQR.S               |

Spot No.: **2**

Mascot score: **165**

Species: *Fusarium oxysporum Fo5176*

Protein name: **amidotransferase**

NCBI accession No.: **gi| 342881721**      Sequence coverage %: **74**

Matched peptides No.: **18**      Total peptides No.: **35**

Calculated Mr: **24474**      Calculated pI: **5.12**

### Annotated PMF spectra:

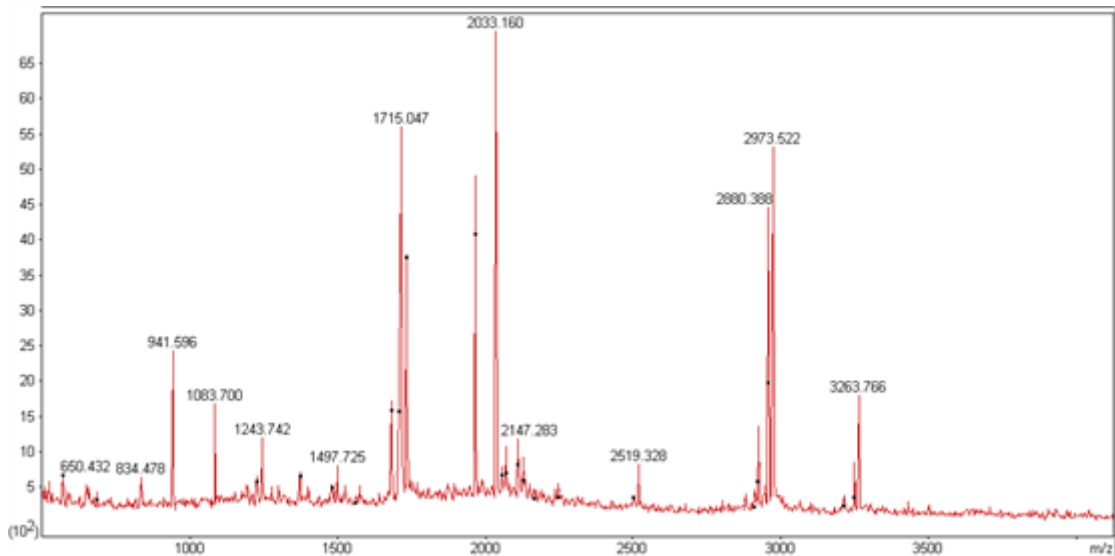

### Probability Based Mowse Score:

Protein score is  $-10 \cdot \log(P)$ , where P is the probability that the observed match is a random event. Protein scores greater than 75 are significant ( $p < 0.05$ ).

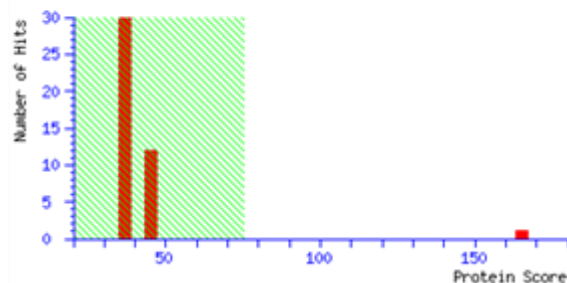

Matched peptide sequences: shown in **Bold Red**

```

1  MAPKVLVVL  SQSKMNNGHP  TGWYLPEFAH  PYYDLVNKGV  EITVASPAGG
51  EAPLDQASVE MFKGDEESVK FLNEKKQIWE QTTPLKEFLG KASEFDAIFY
101 PGGHGPMFDL VNDETSIKLI EEFYKAGKPV AAVCHGPIVF VNVKVDGKPL
151 LEGREATGFS NSEEEAVKLT SAMPVLEDE IKRVGGKYVK ADDWAEKLAV
201 DGQVITGQNP ASAHAVGKAI LKAIGA

```

Matched peptides information:

| Start - End | Observed  | Mr(expt)  | Mr(calc)  | ppm  | M | Peptide                                              |
|-------------|-----------|-----------|-----------|------|---|------------------------------------------------------|
| 39 - 63     | 2503.3027 | 2502.2954 | 2502.2312 | 25.7 | 0 | K.GVEITVASPAGGEAPLDQASVEMFK.G                        |
| 39 - 63     | 2519.3277 | 2518.3204 | 2518.2261 | 37.4 | 0 | K.GVEITVASPAGGEAPLDQASVEMFK.G + Oxidation (M)        |
| 39 - 70     | 3247.7309 | 3246.7236 | 3246.5602 | 50.3 | 1 | K.GVEITVASPAGGEAPLDQASVEMFKGDEESVK.F                 |
| 39 - 70     | 3263.7660 | 3262.7587 | 3262.5551 | 62.4 | 1 | K.GVEITVASPAGGEAPLDQASVEMFKGDEESVK.F + Oxidation (M) |
| 71 - 75     | 650.4320  | 649.4247  | 649.3435  | 125  | 0 | K.FLNEK.K                                            |
| 76 - 86     | 1371.8022 | 1370.7949 | 1370.7558 | 28.6 | 1 | K.QIWEQTTPLK.E                                       |
| 77 - 86     | 1243.7422 | 1242.7349 | 1242.6608 | 59.6 | 0 | K.QIWEQTTPLK.E                                       |
| 92 - 118    | 2957.4826 | 2956.4753 | 2956.3589 | 39.4 | 0 | K.ASEFDAIFYPGGHGPMFDLVNDETSIK.L                      |
| 92 - 118    | 2973.5224 | 2972.5151 | 2972.3539 | 54.3 | 0 | K.ASEFDAIFYPGGHGPMFDLVNDETSIK.L + Oxidation (M)      |
| 119 - 125   | 941.5961  | 940.5888  | 940.4906  | 105  | 0 | K.LIEEFYK.A                                          |
| 126 - 144   | 1963.1677 | 1962.1604 | 1962.0873 | 37.2 | 0 | K.AGKPVAAVCHGPIVFNVK.V                               |
| 145 - 154   | 1083.6999 | 1082.6926 | 1082.6084 | 77.8 | 0 | K.VDGKPLLEGR.E                                       |
| 155 - 168   | 1497.7252 | 1496.7179 | 1496.6631 | 36.7 | 0 | R.EATGFSHSEEEAVK.L                                   |
| 169 - 182   | 1558.8878 | 1557.8805 | 1557.8324 | 30.9 | 0 | K.LTSAMPVLEDEIK.R                                    |
| 169 - 183   | 1715.0472 | 1714.0399 | 1713.9335 | 62.1 | 1 | K.LTSAMPVLEDEIKR.V                                   |
| 169 - 183   | 1731.0303 | 1730.0230 | 1729.9284 | 54.7 | 1 | K.LTSAMPVLEDEIKR.V + Oxidation (M)                   |
| 191 - 197   | 834.4782  | 833.4709  | 833.3555  | 138  | 0 | K.ADDWAEK.L                                          |
| 198 - 218   | 2033.1597 | 2032.1524 | 2032.0702 | 40.5 | 0 | K.LAVDGQVITGQNPASAHAVGK.A                            |

Spot No.: **3**

Mascot score: **143**

Species: *Fusarium oxysporum f. sp. cubense race 4*

Protein name: **Adenosine kinase**

NCBI accession No.: **gi| 475667672**      Sequence coverage %: **59**

Matched peptides No.: **15**      Total peptides No.: **62**

Calculated Mr: **38182**      Calculated pI: **5.34**

### Annotated PMF spectra:

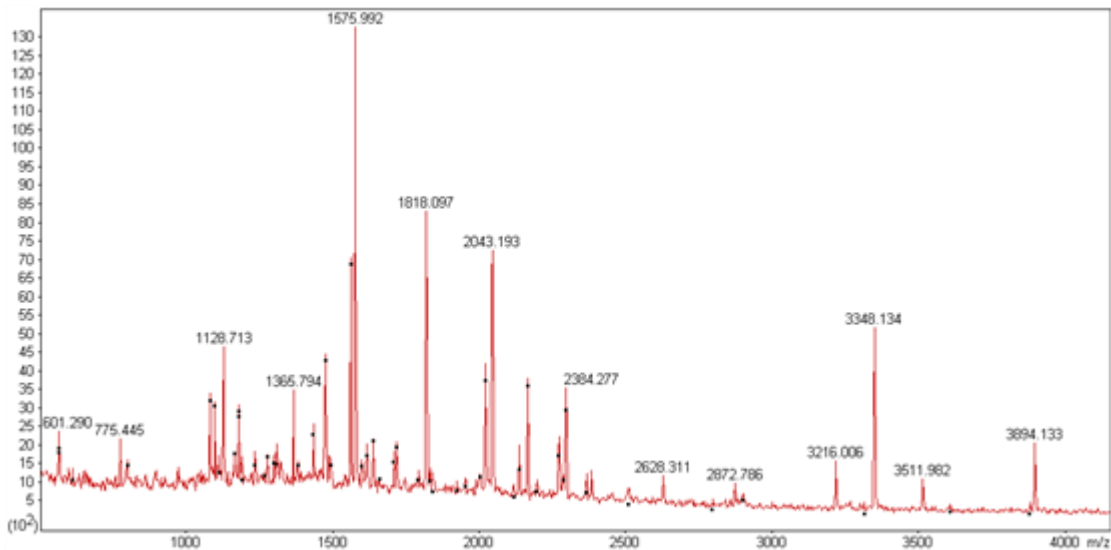

### Probability Based Mowse Score:

Protein score is  $-10 \cdot \log(P)$ , where P is the probability that the observed match is a random event. Protein scores greater than 75 are significant ( $p < 0.05$ ).

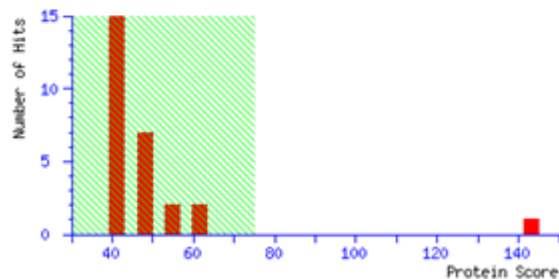

Matched peptide sequences: shown in **Bold Red**

1 MSAV**KEYSLL** **CLENPLLDIQ** **AKGDQALLDK** **YGLKPNDAIL** **AEEKHLPLYE**  
 51 **DLLNMYDAKL** **IAGGAAQNSA** **RGAQYILPPN** **SVVYLGAGD** **DKYAAILHDA**  
 101 **VKAAGLRVEY** **RVDPKEKTGR** **CGAIITGHNR** **SLCTDLGAAN** **HYDLHLKPK**  
 151 **EIWKLVENAE** **VYYVGGFHFT** **VCPPAIMELA** **KQAAEHNKPF** **VLSLSAPFIP**  
 201 **QFFKEVDAS** **APYWDYIIGN** **ETEAAAYAES** **HDLPSKEPRD** **VVKHLANLPK**  
 251 **ENTKRKRIAI** **VTQGTDPTLV** **AIQGEDDIKE** **FPVHAIKEK** **INDTNGAGDA**  
 301 **FAGGLLAGIL** **QNKPLETSID** **MGQWLARLSI** **QELGPSYPPF** **KQTYQAA**

Matched peptides information:

| Start - End | Observed  | Mr (expt) | Mr (calc) | ppm   | M | Peptide                                      |
|-------------|-----------|-----------|-----------|-------|---|----------------------------------------------|
| 6 - 22      | 2019.2720 | 2019.2647 | 2019.0394 | 112   | 0 | K.EYSL <b>CLENPLLDIQAK</b> .G                |
| 31 - 44     | 1560.9581 | 1559.9508 | 1559.8195 | 84.2  | 0 | K.YGLKPNDAI <b>LAEKE</b> .E                  |
| 45 - 59     | 1818.0969 | 1817.0896 | 1816.8995 | 105   | 0 | K.HLPLYEDLLNMYDAK.L                          |
| 60 - 71     | 1128.7127 | 1127.7054 | 1127.6047 | 89.3  | 0 | K.LIAGGAAQNSAR.G                             |
| 72 - 92     | 2134.3160 | 2133.3087 | 2133.0742 | 110   | 0 | R.GAQYILPPNSVVYLGAGDDK.Y                     |
| 72 - 102    | 3216.0063 | 3214.9990 | 3214.6662 | 104   | 1 | R.GAQYILPPNSVVYLGAGDDKRYAAILEDVAK.A          |
| 108 - 111   | 566.2984  | 565.2911  | 565.2860  | 9.06  | 0 | R.VEYR.V                                     |
| 121 - 130   | 1098.6394 | 1097.6321 | 1097.5400 | 83.9  | 0 | R.CGAIITGHNR.S                               |
| 131 - 148   | 2043.1928 | 2042.1855 | 2041.9527 | 114   | 0 | R.SLCTDLGAANHYDLHLK.K                        |
| 149 - 154   | 800.4406  | 799.4333  | 799.4592  | -32.4 | 0 | K.KPEIMK.L                                   |
| 205 - 236   | 3511.9815 | 3510.9742 | 3510.6103 | 104   | 0 | K.EVVDASAPYWDYIIGNETEAAAYAESHDLPSK.E         |
| 205 - 239   | 3894.1332 | 3893.1259 | 3892.8067 | 82.0  | 1 | K.EVVDASAPYWDYIIGNETEAAAYAESHDLPSKEPR.D      |
| 258 - 279   | 2297.5012 | 2296.4939 | 2296.2162 | 121   | 0 | R.IAIVTQGTDPTLVAIQGEDDIK.E                   |
| 258 - 288   | 3348.1341 | 3347.1268 | 3346.7660 | 108   | 1 | R.IAIVTQGTDPTLVAIQGEDDIK <b>FPVHAIKEK</b> .E |
| 328 - 341   | 1575.9920 | 1574.9847 | 1574.8344 | 95.4  | 0 | R.LSIQELGPSYPPFK.Q                           |

Spot No.: **4**

Mascot score: **157**

Species: ***Fusarium oxysporum Fo5176***

Protein name: **NADP-dependent glycerol dehydrogenase**

NCBI accession No.: **gi| 342888721** Sequence coverage %: **53**

Matched peptides No.: **18**

Total peptides No.: **43**

Calculated Mr: **37413**

Calculated pI: **5.91**

### Annotated PMF spectra:

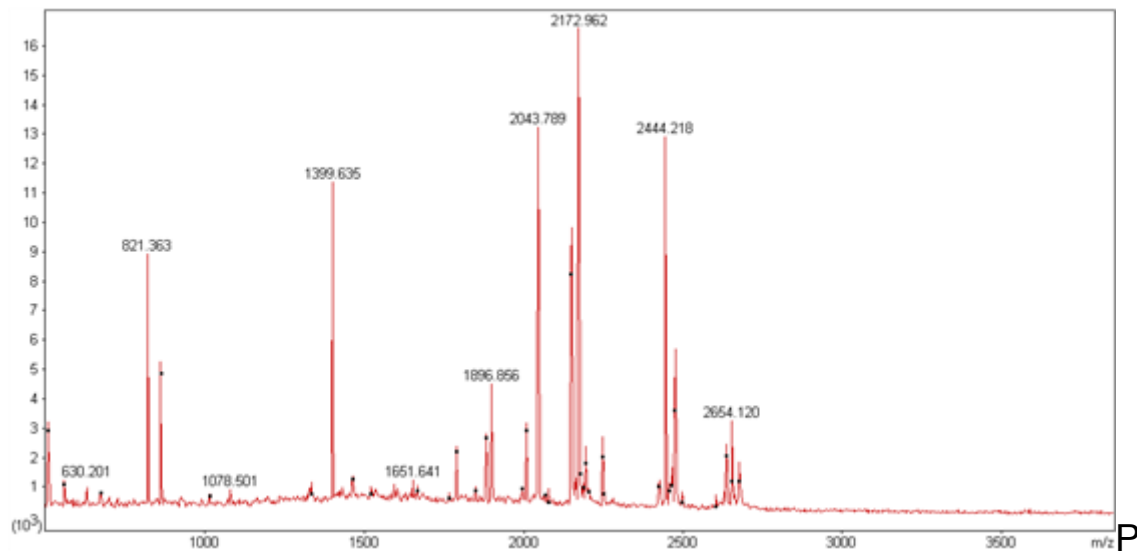

### Probability Based Mowse Score:

Protein score is  $-10 \cdot \log(P)$ , where P is the probability that the observed match is a random event. Protein scores greater than 75 are significant ( $p < 0.05$ ).

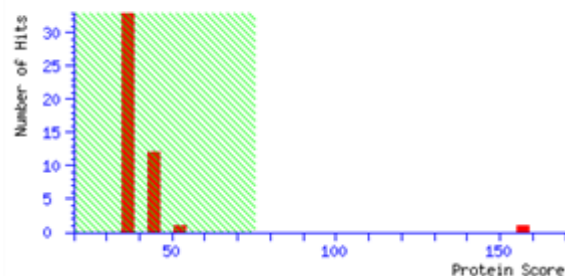



## Matched peptide sequences: shown in **Bold Red**

1 MSFGRTVTLN SGHK**MPQIGY** **GTWQAAPGEV** **GNGVYEALKA** GYRHLDLAKI  
 51 **YQNQR**EVGEG IKKALNDVPG LK**REDIFITG** **KLWNNK**HRPE EVPGALDDSL  
 101 EELGLDYLDL WLIHWPVAFK **NGPELFPLKA** **DDKNKTELDQ** **GVTLSQTWEA**  
 151 **VTKLPKEKVR** **SIGVSNFSIE** **MLETIIKDTG** **VTPAINQVER** HPRLPQPELV  
 201 KYQKEKGIYL TAYSAFGNNS WGEPLLINTP **EVKAI**AERLS KSKGK**EVTPA**  
 251 **QVILAWSTLD** **NHIVIPKSVT** **PARIRSNFEE** **VELDEEAIKE** **LEKFGEKPQR**  
 301 **FNIPKTYSPD** **WDIDVFGDEK** **EKTATHKVVL** KL

## Matched peptides information:

| Start - End | Observed  | Mr (expt) | Mr (calc) | ppm   | M | Peptide                                                |
|-------------|-----------|-----------|-----------|-------|---|--------------------------------------------------------|
| 15 - 39     | 2652.1644 | 2651.1571 | 2651.2690 | -42.2 | 0 | K. <b>MPQIGYGTWQAAPGEVNGVYEALKA</b> .A + Oxidation (0) |
| 50 - 55     | 821.3626  | 820.3553  | 820.4191  | -77.8 | 0 | K. <b>YQNQR</b> .E                                     |
| 73 - 81     | 1078.5007 | 1077.4934 | 1077.5818 | -82.1 | 1 | K. <b>REDIFITG</b> .L                                  |
| 82 - 86     | 674.2166  | 673.2094  | 673.3547  | -216  | 0 | K. <b>LWNNK</b> .H                                     |
| 121 - 129   | 1014.4226 | 1013.4153 | 1013.5546 | -137  | 0 | K. <b>NGPELFPLKA</b> .A                                |
| 134 - 153   | 2248.0157 | 2247.0084 | 2247.1383 | -57.8 | 1 | K. <b>NKTELDQVVTLSQTWEAVTK</b> .L                      |
| 136 - 153   | 2005.8656 | 2004.8583 | 2005.0004 | -70.9 | 0 | K. <b>TELDQVVTLSQTWEAVTK</b> .L                        |
| 161 - 177   | 1880.8605 | 1879.8532 | 1879.9965 | -76.2 | 0 | R. <b>SIGVSNFSIEMLETIIK</b> .D                         |
| 161 - 177   | 1896.8560 | 1895.8487 | 1895.9914 | -75.2 | 0 | R. <b>SIGVSNFSIEMLETIIK</b> .D + Oxidation (0)         |
| 178 - 190   | 1399.6346 | 1398.6273 | 1398.7103 | -59.3 | 0 | K. <b>DTGVTPAINQVER</b> .H                             |
| 234 - 238   | 559.2314  | 558.2241  | 558.3125  | -158  | 0 | K. <b>AI</b> AER.L                                     |
| 246 - 267   | 2444.2185 | 2443.2112 | 2443.3475 | -55.8 | 0 | K. <b>EVTPAQVILAWSTLDNHIVIPK</b> .S                    |
| 268 - 273   | 630.2008  | 629.1935  | 629.3497  | -248  | 0 | K. <b>SVTPAR</b> .I                                    |
| 276 - 289   | 1651.6410 | 1650.6337 | 1650.7624 | -78.0 | 0 | R. <b>SNFEEVELDEEAIK</b> .E                            |
| 276 - 293   | 2150.8875 | 2149.8802 | 2150.0266 | -68.1 | 1 | R. <b>SNFEEVELDEEAIKELEK</b> .F                        |
| 294 - 300   | 861.3838  | 860.3765  | 860.4504  | -85.9 | 0 | K. <b>FGEKPQR</b> .F                                   |
| 306 - 320   | 1786.6680 | 1785.6607 | 1785.7734 | -63.1 | 0 | K. <b>TYSPDWDIDVFGDEK</b> .E                           |
| 306 - 322   | 2043.7891 | 2042.7818 | 2042.9109 | -63.2 | 1 | K. <b>TYSPDWDIDVFGDEKEK</b> .T                         |

Spot No.: **5**

Mascot score: **147**

Species: *Fusarium oxysporum f. sp. cubense race 4*

Protein name: **Catalase-peroxidase 2**

NCBI accession No.: **gi| 475672437**      Sequence coverage %: **37**

Matched peptides No.: **29**      Total peptides No.: **71**

Calculated Mr: **85233**      Calculated pI: **6.57**

### Annotated PMF spectra:

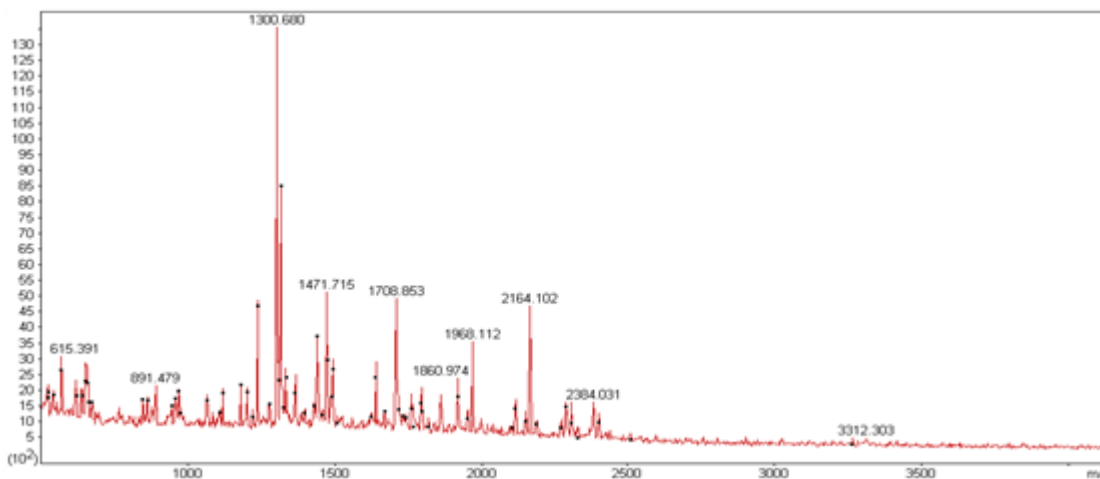

### Probability Based Mowse Score:

Protein score is  $-10 \cdot \log(P)$ , where P is the probability that the observed match is a random event. Protein scores greater than 75 are significant ( $p < 0.05$ ).

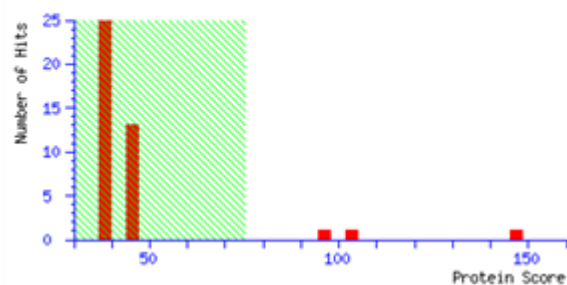

## Matched peptide sequences: shown in **Bold Red**

```

1  MHVQSLLLAS  GLVPLAASQG  CFFAKRAITDT  NLVPPREIPE  DFGICRVASN
51  QAGGGTRSRD  FWPCALRLDV  LRQFSPPYNP  LGADFDYTEA  FKSLDFAALK
101 KDLNALLTDS  QDWWPADHGN  YGGLFIRMSW  HSAGTYRAMD  GRGGSGMGQQ
151 RFAPLDSWPD  NQNLDKARRL  LWPIKQKYGS  KISWADLMVL  AGNVALEHSG
201 FETLGFAGGR  ADTWEADESI  YWGAESTFVP  KGNDVRYNGS  TDIYERADKL
251 EKPLGATHFG  LIYVNPEGPD  GSSDPKASAL  DIRTAFGRMG  MDDEETAALI
301 IGGHTLGKTH  GAVPAKNIGP  EPMAADLGEM  GLGWHNSVNE  GNGPDQMTSG
351 LEVIWSTTPT  KWSNHFLKSL  LGNNWTLVES  PAGHKQWEAL  NGKLEYDPDF
401 VKGKFRPTM  LTSDLALIND  PSYLIKICKRW  HDNPKELNAA  FARAWYKLLH
451 RDLGPVSRYL  GPEVAKEKFI  WQDPLPERKG  DIIGEADISS  LKSAILSADG
501 LDVSKLVSTA  WNSASTFRGT  DKRGGANGAR  IALEPQVNWV  SNNPKQLKQV
551 LSALKKVQKD  FNSKSGSCKV  SLADLIVLGG  VAAIEKAAQA  AGFKDVEVPF
601 TPGRVDATQN  QTDLVQFGYL  EPLADGFRNY  GHGTARARTE  EILVDRAALL
651 TLTPPEMTVL  VGGLRALNAN  YDGSSNGILT  EKKGQLTNDF  FVNLLSPAYS
701 WAKKDSQGEL  WTGTDRATKS  VKWTATRADL  VFGSHAELEA  ISEVYGSADA
751 KEKFVKDFIS  AWTKVMNLDR  FDVKAEEK

```

## Matched peptides information:

| Start - End | Observed  | Ms (expt) | Ms (calc) | ppm   | # | Peptide                                 |
|-------------|-----------|-----------|-----------|-------|---|-----------------------------------------|
| 37 - 44     | 1238.5955 | 1234.5682 | 1234.5682 | 18.4  | 0 | R.EIFEDFOICE.V                          |
| 58 - 67     | 1307.6392 | 1306.6319 | 1306.6241 | 6.05  | 1 | R.SRDVPCALR.L                           |
| 60 - 67     | 1064.5356 | 1063.5203 | 1063.4909 | 35.2  | 0 | R.DVPCALR.L                             |
| 68 - 72     | 655.3906  | 654.3834  | 654.3752  | 13.3  | 0 | R.LDVLR.Q                               |
| 73 - 92     | 2307.0627 | 2306.0554 | 2306.0532 | 0.86  | 0 | R.QFSPPYKLGADFDYTEAFK.S                 |
| 102 - 146   | 1759.8441 | 1758.8368 | 1758.8213 | 8.82  | 0 | R.FAPLDSVQVQHLER.A                      |
| 211 - 231   | 2402.0703 | 2401.0720 | 2401.0750 | -1.66 | 0 | R.ADTWEADESIYWGAESTFVPE.G               |
| 237 - 246   | 1217.6048 | 1216.5975 | 1216.5360 | 50.4  | 0 | R.TYKSTDIYER.A                          |
| 277 - 286   | 1277.6509 | 1276.6436 | 1276.6889 | -35.4 | 1 | K.ASALDIRTAFGR.H                        |
| 394 - 402   | 1107.5554 | 1106.5481 | 1106.5648 | -15.1 | 0 | K.LEYDFPFYE.G                           |
| 407 - 425   | 2148.1153 | 2147.1080 | 2147.1294 | -10.1 | 0 | R.RPTHLTSDLALINDPSYLR.I                 |
| 407 - 425   | 2164.1022 | 2163.0949 | 2163.1245 | -13.7 | 0 | R.RPTHLTSDLALINDPSYLR.I + Oxidation: DS |
| 436 - 443   | 891.4794  | 890.4721  | 890.4610  | 12.5  | 0 | K.EURNAZAR.A                            |
| 469 - 478   | 1300.6799 | 1299.6725 | 1299.6612 | 8.74  | 0 | K.FVQDPLPER.K                           |
| 469 - 479   | 1428.7409 | 1427.7336 | 1427.7561 | -1.75 | 1 | K.FVQDPLPERK.G                          |
| 504 - 516   | 1438.7273 | 1438.7200 | 1438.7200 | -0.35 | 0 | K.LVSTAMRSASTER.D                       |
| 531 - 545   | 1708.8830 | 1707.8457 | 1707.8944 | -28.9 | 0 | R.IALEPQVAVVSHQK.Q                      |
| 549 - 584   | 1796.0198 | 1795.0125 | 1795.0019 | -36.4 | 1 | K.VYSLADLIVLQVVAIEK.A                   |
| 570 - 584   | 1667.9832 | 1666.9459 | 1666.9869 | -24.4 | 0 | K.VYSLADLIVLQVVAIEK.A                   |
| 587 - 604   | 1060.9741 | 1059.9668 | 1059.9530 | 7.43  | 1 | K.AQAAGEIEVYVFTQGR.V                    |
| 595 - 604   | 1116.9647 | 1115.9574 | 1115.9611 | -3.33 | 0 | K.DVEVYVFTQGR.V                         |
| 637 - 646   | 1201.6254 | 1200.6181 | 1200.6462 | -23.4 | 1 | R.ARTREIYVER.A                          |
| 647 - 665   | 1302.1142 | 1301.1069 | 1301.1174 | -5.48 | 0 | R.AALLTTPPEMTVLVQGLR.A                  |
| 647 - 665   | 1368.1119 | 1367.1046 | 1367.1125 | -4.02 | 0 | R.AALLTTPPEMTVLVQGLR.A + Oxidation: DS  |
| 646 - 662   | 1766.8312 | 1765.8239 | 1765.8482 | -13.8 | 0 | R.ALMNHYDGSNHLTER.K                     |
| 704 - 716   | 1492.7039 | 1491.6966 | 1491.6954 | -0.82 | 1 | K.RDQQLNTQTER.A                         |
| 705 - 716   | 1364.6050 | 1363.5977 | 1363.6004 | -1.99 | 0 | K.DDQQLNTQTER.A                         |
| 728 - 739   | 1314.7044 | 1313.6971 | 1313.6728 | 18.5  | 0 | R.ADLVYQSHAELEA.A                       |
| 757 - 764   | 967.4766  | 966.4715  | 966.4811  | -10.1 | 0 | K.EFISANTK.V                            |

Spot No.: **6**

Mascot score: **95**

Species: *Fusarium oxysporum f. sp. cubense race 1*

Protein name: **Superoxide dismutase [Mn], mitochondrial**

NCBI accession No.: **gi| 477512799**      Sequence coverage %: **67**

Matched peptides No.: **11**

Total peptides No.: **78**

Calculated Mr: **21308**

Calculated pI: **7.07**

### Annotated PMF spectra:

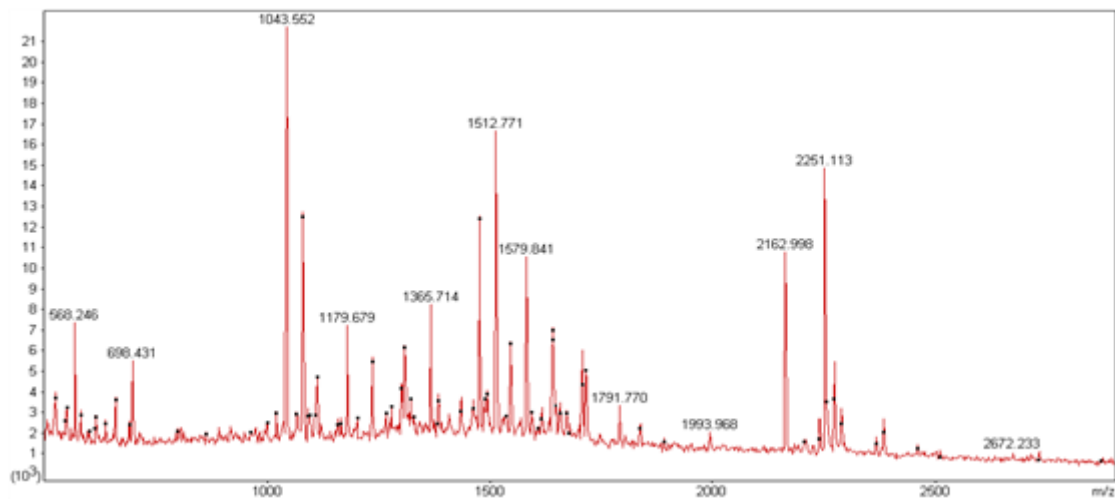

### Probability Based Mowse Score:

Protein score is  $-10 \cdot \log(P)$ , where P is the probability that the observed match is a random event. Protein scores greater than 75 are significant ( $p < 0.05$ ).

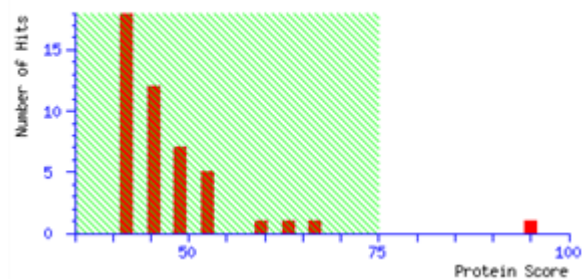

Matched peptide sequences: shown in **Bold Red**

1 MSVGTYSLPA LPYAYDALEP SISAQIMELH **HSKHHQAYVT NLNAALKNYA**  
51 **TATSTNDIAG QIALQSAIKF** NGGGHINHSL FWENLSPSSS ADAKPESAPT  
101 **LSAEISKTWG SIQAFQEAFK** KTLGLQSG WGWLVKDTHG LRIVTTKDQD  
151 PVVGGEYLNK **KAAVVDNIWK VINWKTAEAR FTGTREDAFK** VLRASI

Matched peptides information:

| Start - End | Observed  | Mr(expt)  | Mr(calc)  | ppm   | M | Peptide                                   |
|-------------|-----------|-----------|-----------|-------|---|-------------------------------------------|
| 34 - 47     | 1579.8409 | 1578.8336 | 1578.8266 | 4.42  | 0 | K.HHQAYVTNLNAALK.N                        |
| 48 - 69     | 2251.1125 | 2250.1052 | 2250.1492 | -19.5 | 0 | K.NYATATSTNDIAGQIALQSAIK.F                |
| 70 - 107    | 3983.1864 | 3982.1791 | 3981.9133 | 66.8  | 0 | K.FNGGGHINHSLFWENLSPSSSADAKPESAPLSAEISK.T |
| 108 - 120   | 1512.7708 | 1511.7635 | 1511.7409 | 15.0  | 0 | K.TWGSIQAFQEAFK.K                         |
| 108 - 121   | 1640.8549 | 1639.8476 | 1639.8358 | 7.19  | 1 | K.TWGSIQAFQEAFK.T                         |
| 122 - 136   | 1614.8704 | 1613.8631 | 1613.8930 | -18.5 | 0 | K.TLLGLQSGWGWLVK.D                        |
| 137 - 142   | 698.4314  | 697.4241  | 697.3507  | 105   | 0 | K.DTHGLR.I                                |
| 162 - 170   | 1079.5939 | 1078.5866 | 1078.5447 | 38.8  | 0 | K.AAVVDNIWK.V                             |
| 171 - 175   | 659.4396  | 658.4323  | 658.3802  | 79.0  | 0 | K.VINWK.T                                 |
| 176 - 180   | 547.3617  | 546.3544  | 546.2762  | 143   | 0 | K.TAEAR.F                                 |
| 181 - 185   | 581.3940  | 580.3868  | 580.2969  | 155   | 0 | R.FTOTR.E                                 |

Spot No.: 7

Mascot score: 90

Species: *Fusarium oxysporum f. sp. cubense race 4*

Protein name: Phosphoglycerate kinase

NCBI accession No.: gi| 475667960      Sequence coverage %: 56

Matched peptides No.: 18      Total peptides No.: 72

Calculated Mr: 44835      Calculated pI: 5.77

### Annotated PMF spectra:

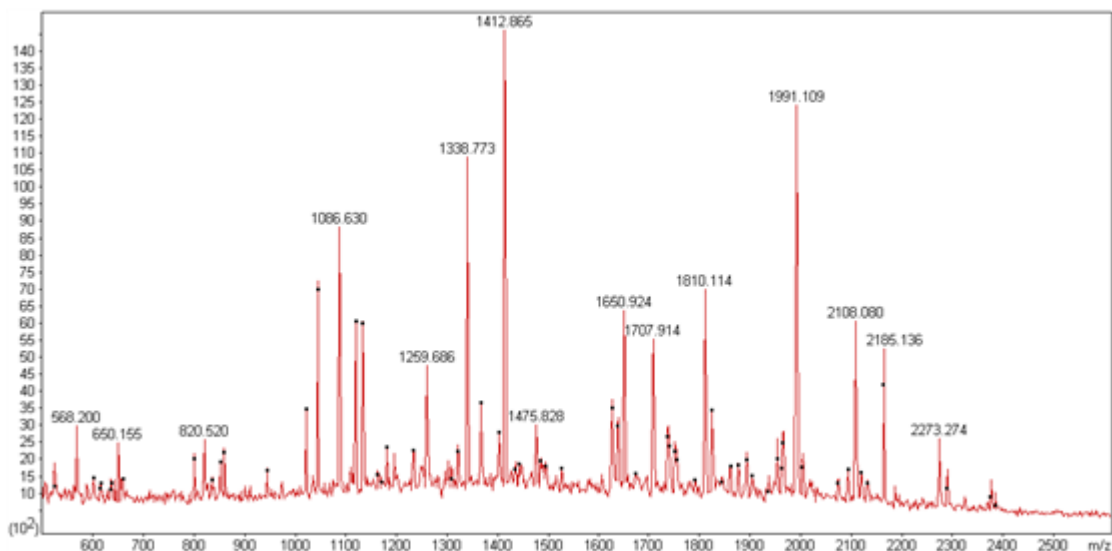

### Probability Based Mowse Score:

Protein score is  $-10 \cdot \log(P)$ , where P is the probability that the observed match is a random event. Protein scores greater than 75 are significant ( $p < 0.05$ ).

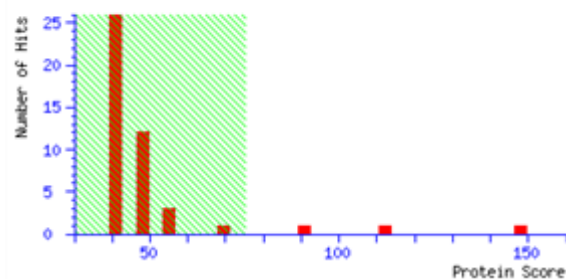

## Matched peptide sequences: shown in **Bold Red**

```

1  MSLSNKL SIT  DVDVKGK RVL  IRVDFNV PLD  ADKNITNNQR  IVGALPTIKY
51  ALENGAKSVI  LMSHLGR PNG  SPNEKYS LKP  VVPELEKLLG  KKVTFAPDCV
101 GPEVEEIVNK  AEDGAVIL LE  NLRFHIEE EG  SSKDKEGNKT  KADKAQVEAF
151 RKGLTALGDV  YINDAFGT AH  RAHSSMV GVD  LPQKASGF LV  KKELEYFAKA
201 LEEPQRPFLA  ILGGARV SDK  IQLIDNLL DK  VNTLIICGM M  AFTFKKTLEG
251 VSIGNSLFDE  AGSKTVGN LV  EKAKAKGVKL  VLPVDYITAD KFDKDANTGY
301 ATDKDGIPDG  WQGLDCGE ES  VKLYKEAIAE  AKTILWNGPA GVFEFEK FAS
351 GTKATLDAVV  DAVQKDGK IV  IIGGGDTAT V  AKKYGVEDKL  SHVSTGGGAS
401 LELLEKELP  GVTALSSK

```

## Matched peptides information:

| Start | End | Observed  | Mr (expt) | Mr (calc) | ppm   | M | Peptide                  |
|-------|-----|-----------|-----------|-----------|-------|---|--------------------------|
| 23    | 33  | 1232.6774 | 1231.6701 | 1231.6085 | 50.1  | 0 | R.VDFNVPLDADK.N          |
| 34    | 49  | 1751.9438 | 1750.9365 | 1751.0053 | -39.3 | 1 | K.NITNNQRIVGALPTIK.Y     |
| 58    | 75  | 1936.0247 | 1935.0174 | 1934.9996 | 9.21  | 0 | K.SVILMSHLGRFNOSPREK.Y   |
| 76    | 87  | 1401.7975 | 1400.7902 | 1400.7915 | -0.90 | 0 | K.YSLKPVVFELEK.L         |
| 92    | 110 | 2131.1438 | 2130.1365 | 2130.0667 | 32.8  | 1 | K.KVTFAPDCVQPEVEEIVNK.A  |
| 93    | 110 | 2003.0677 | 2002.0604 | 2001.9718 | 44.3  | 0 | K.VTFAPDCVQPEVEEIVNK.A   |
| 111   | 123 | 1412.8653 | 1411.8580 | 1411.7671 | 64.4  | 0 | K.AEDGAVILLENLR.F        |
| 124   | 133 | 1162.6306 | 1161.6233 | 1161.5302 | 80.2  | 0 | R.FHIEEISSK.D            |
| 145   | 151 | 820.5201  | 819.5129  | 819.4239  | 109   | 0 | K.AQVEAFR.K              |
| 152   | 171 | 2119.1825 | 2118.1752 | 2118.0858 | 42.2  | 1 | R.KGLTALGDVYINDAFGTAHR.A |
| 153   | 171 | 1991.1094 | 1990.1021 | 1989.9908 | 55.9  | 0 | K.GLTALGDVYINDAFGTAHR.A  |
| 200   | 216 | 1810.1135 | 1809.1062 | 1809.0148 | 50.5  | 0 | K.ALEEPQRPFLAIILOGAK.V   |
| 247   | 264 | 1823.9783 | 1822.9710 | 1822.8949 | 41.8  | 0 | K.TLEGVVSIGNSLFDEAGSK.T  |
| 265   | 272 | 859.5288  | 858.5215  | 858.4811  | 47.1  | 0 | K.TVGNLVEK.A             |
| 280   | 294 | 1736.9988 | 1735.9915 | 1735.9396 | 29.9  | 1 | K.LVLPVDYITADKFDK.D      |
| 305   | 322 | 1961.9684 | 1960.9611 | 1960.8473 | 58.1  | 0 | K.DOIPDMQQLDCQESVSK.L    |
| 333   | 347 | 1707.9143 | 1706.9070 | 1706.8668 | 23.6  | 0 | K.YILMNGPAGVFEFEK.F      |
| 390   | 407 | 1755.0038 | 1753.9965 | 1753.9210 | 43.0  | 0 | K.LSHVSTGGGASLELEK.E     |

Spot No.: **8**

Mascot score: **90**

Species: *Fusarium oxysporum f. sp. cubense race 4*

Protein name: **S-adenosylmethionine synthase**

NCBI accession No.: **gi| 475664008** Sequence coverage %: **55**

Matched peptides No.: **16**

Total peptides No.: **65**

Calculated Mr: **44513**

Calculated pI: **5.77**

### Annotated PMF spectra:

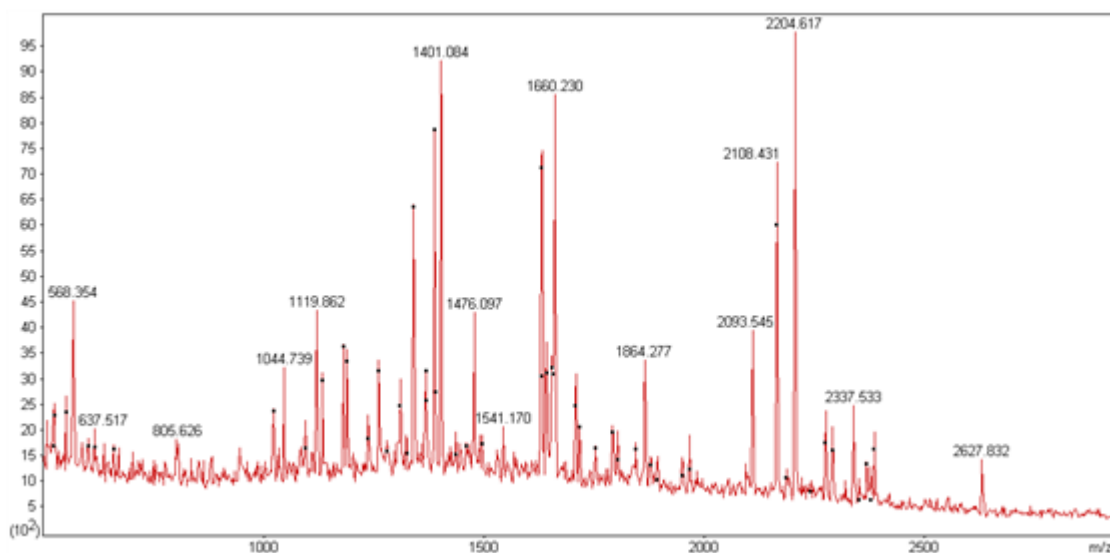

### Probability Based Mowse Score:

Protein score is  $-10 \cdot \log(P)$ , where P is the probability that the observed match is a random event. Protein scores greater than 75 are significant ( $p < 0.05$ ).

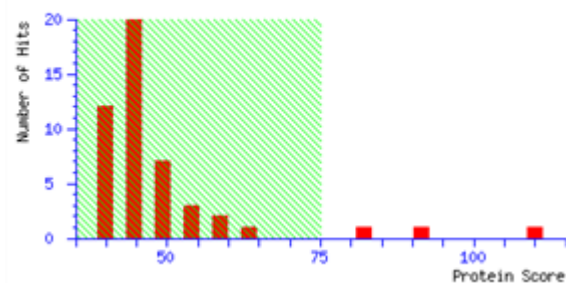



## Matched peptide sequences: shown in **Bold Red**

```

1  MSATNGTNGV  HAELSSWKHY  NEGSFLTSE  SVGEGHPDKI  ADQVSDAILD
51 ACLREDPLSK  VACETATKTG  MIMVFGEITT  QAKLDYQKVV  RDAIKDIGYD
101 DSAKGFYDKT  CNLLVAIEQQ  SPDIAQGLHY  EKALEQLGAG  DQGIMFGYAT
151 DETPELFPLT  LFAHKLNAA  MSAARDGSL  PWLRPDTKTQ  VTIEYKHDNG
201 AVVPQRVHTV  VVSAQHSPDI  STEELRKEIK  EKIIKKVIPA  KYLSDETIYH
251 IQPSGLFIIG  GPQGDAGLTG  RKIIVDTYGG  WGAHGGGAFS  GKDFSKVDRS
301 AAVVGRIAK  SLVNAKLCRR  ALVQLSYAIG  VAEPLSIYVD  SYGTSEKTSE
351 ELVQIIRDNF  DLRPGVIVRE  LNLDPHYLQ  TAKNGHFGTN  QSFSWEQPK
401 LKF

```

## Matched peptides information:

| Start - End | Observed  | Mr (expt) | Mr (calc) | ppm  | M | Peptide                                                      |
|-------------|-----------|-----------|-----------|------|---|--------------------------------------------------------------|
| 19 - 39     | 2337.5331 | 2336.5258 | 2336.0346 | 210  | 0 | K.HYNEOSPLTSES <b>VGEGHPDK</b> .I                            |
| 40 - 54     | 1660.2298 | 1659.2225 | 1658.8298 | 237  | 0 | K.IADQVSDAILD <b>ACL</b> .E                                  |
| 69 - 83     | 1627.2119 | 1626.2046 | 1625.8157 | 239  | 0 | K.TGMIMV <b>FGEITTQAK</b> .L                                 |
| 69 - 88     | 2273.6284 | 2272.6211 | 2273.1436 | -230 | 1 | K.TGMIMV <b>FGEITTQAKLDYQK</b> .V                            |
| 69 - 88     | 2289.6259 | 2288.6186 | 2289.1385 | -227 | 1 | K.TGMIMV <b>FGEITTQAKLDYQK</b> .V + Oxidation (O)            |
| 110 - 132   | 2627.8322 | 2626.8249 | 2626.3061 | 198  | 0 | K.TCNLLVAIE <b>QQSPDIAQGLHYEK</b> .A                         |
| 176 - 188   | 1541.1704 | 1540.1631 | 1539.8158 | 226  | 1 | R.RD <b>SLPWLRPDTK</b> .T                                    |
| 177 - 188   | 1385.0441 | 1384.0368 | 1383.7147 | 233  | 0 | R.D <b>SLPWLRPDTK</b> .T                                     |
| 197 - 206   | 1092.8272 | 1091.8199 | 1091.5472 | 250  | 0 | K.H <b>DNGAVV</b> Q <b>R</b> .V                              |
| 207 - 226   | 2204.6166 | 2203.6093 | 2203.1233 | 221  | 0 | R.V <b>HTVVVSAQHS</b> PD <b>ISTEELR</b> .K                   |
| 242 - 271   | 3176.2387 | 3175.2314 | 3174.5986 | 199  | 0 | K.Y <b>LSDETIYHI</b> Q <b>PSGLFI</b> GG <b>PPGDAGLTGR</b> .K |
| 273 - 292   | 1950.3641 | 1949.3568 | 1948.9432 | 212  | 0 | K.I <b>IVDTYOG</b> W <b>AHGGGAFS</b> GR.D                    |
| 348 - 357   | 1187.9566 | 1186.9493 | 1186.6557 | 247  | 0 | K.T <b>SEELVQ</b> I <b>R</b> .D                              |
| 358 - 369   | 1401.0836 | 1400.0763 | 1399.7572 | 228  | 0 | R.D <b>NFDLR</b> PG <b>VIVR</b> .E                           |
| 370 - 383   | 1655.2366 | 1654.2293 | 1653.8726 | 216  | 0 | R.E <b>LNLDP</b> HY <b>LQ</b> T <b>AK</b> .N                 |
| 384 - 399   | 1864.2768 | 1863.2695 | 1862.8336 | 234  | 0 | K.N <b>GFOTN</b> Q <b>SFS</b> W <b>EQPK</b> .E               |

Spot No.: **9**

Mascot score: **170**

Species: *Fusarium oxysporum f. sp. cubense race 4*

Protein name: **Fructose-bisphosphate aldolase**

NCBI accession No.: **gi| 475673861** Sequence coverage %: **51**

Matched peptides No.: **17**

Total peptides No.: **49**

Calculated Mr: **37389**

Calculated *pI*: **5.24**

### Annotated PMF spectra:

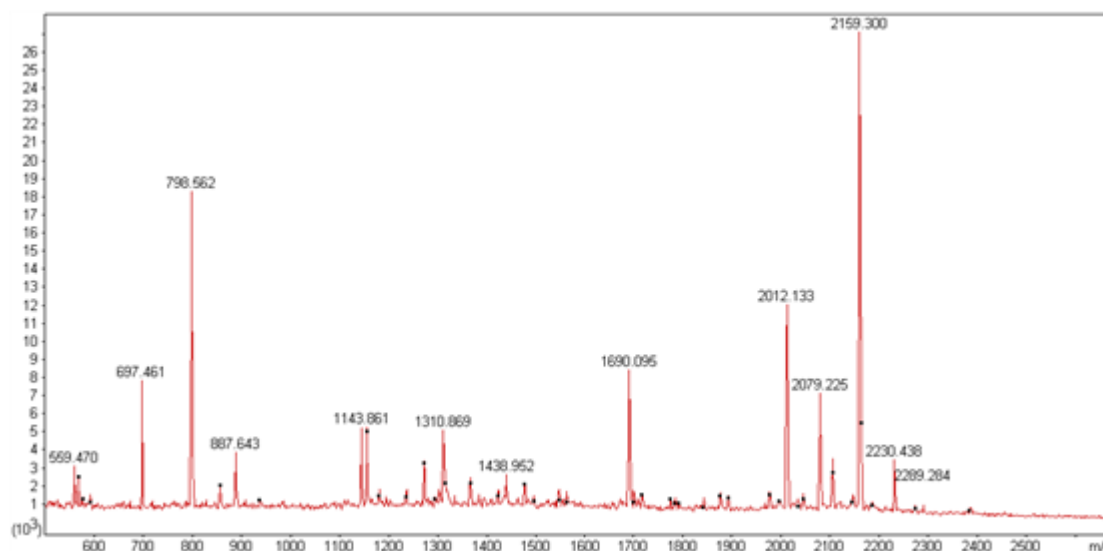

### Probability Based Mowse Score:

Protein score is  $-10 \cdot \log(P)$ , where  $P$  is the probability that the observed match is a random event. Protein scores greater than 75 are significant ( $p < 0.05$ ).

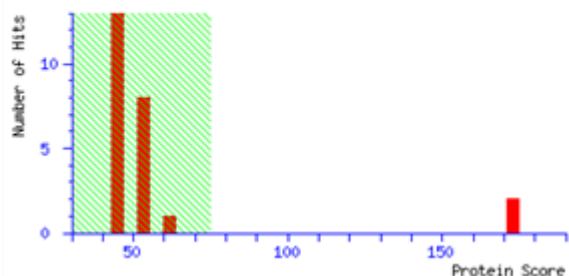

## Matched peptide sequences: shown in **Bold Red**

1 **MGVQEVLSRK** **TGVIVGDDVL** **RLFYAREHK** FAIPAINVTS SSTVVAALEA  
 51 ARDNKAPVIL QFSQGGAAFY **AGKGVSNDDQ** **AASIAGSIAA** **AHYVRS**LAPT  
 101 **YGIPVVLHTD** **HCAKLLPWL** DGMLDADEAY FKEKGEPLFS **SHMIDLSEEP**  
 151 **VEWNIETTAK** YLKRAAPMKQ WLEMEIGITG GEEDGVNND VDNNSLYTQP  
 201 EDILNIYNIL SPISPYFSIA AGFGNVHGVY KPGNVKLHPE LLGKHQAHVK  
 251 **EALKSDNDKP** **VFFVFHGGSG** **SSKKEYLDAI** **GFGVVKVND** **TDMQFAYCSG**  
 301 **IRDYMINKRE** **YVNTTVGNPD** **GEDKPNKKYF** **DPRVWVREGE** **KTMSKRVAEA**  
 351 **LQDFNTANQL**

## Matched peptides information:

| Start - End | Observed  | Mr (expt) | Mr (calc) | ppm  | M | Peptide                                        |
|-------------|-----------|-----------|-----------|------|---|------------------------------------------------|
| 2 - 9       | 887.6426  | 886.6353  | 886.4872  | 167  | 0 | M.GVQEVLSR.K                                   |
| 10 - 21     | 1271.9555 | 1270.9482 | 1270.7245 | 176  | 1 | R.KTGVIVGDDVLR.L                               |
| 11 - 21     | 1143.8614 | 1142.8541 | 1142.6296 | 197  | 0 | K.TGVIVGDDVLR.L                                |
| 22 - 27     | 798.5619  | 797.5546  | 797.4072  | 185  | 0 | R.LFEYAR.E                                     |
| 74 - 95     | 2159.2996 | 2158.2923 | 2158.0767 | 99.9 | 0 | K.GVSNDDQAASIAGSIAAAHYVR.S                     |
| 96 - 114    | 2079.2248 | 2078.2175 | 2078.0619 | 74.9 | 0 | R.SLAPTYGIPVVLHTDCAK.K                         |
| 135 - 160   | 2975.6335 | 2974.6262 | 2974.3906 | 79.2 | 0 | K.GEPLFSSHMIDLSEEPVEWNIETTAK.Y + Oxidation (M) |
| 255 - 273   | 2012.1332 | 2011.1259 | 2010.9436 | 90.7 | 0 | K.SDNDKPVFFVFHGGSGSSK.K                        |
| 274 - 286   | 1438.9519 | 1437.9446 | 1437.7868 | 110  | 1 | K.KEYLDAIGFGVVK.V                              |
| 275 - 286   | 1310.8688 | 1309.8615 | 1309.6918 | 130  | 0 | K.EYLDAIGFGVVK.V                               |
| 287 - 302   | 1876.0913 | 1875.0840 | 1874.8291 | 136  | 0 | K.VNVDTDMQFAYCSGIR.D                           |
| 287 - 302   | 1892.0401 | 1891.0328 | 1890.8241 | 110  | 0 | K.VNVDTDMQFAYCSGIR.D + Oxidation (M)           |
| 310 - 327   | 1977.1124 | 1976.1051 | 1975.9123 | 97.6 | 0 | R.EYVNTTVGNPDGEDKPNK.K                         |
| 310 - 328   | 2105.1994 | 2104.1921 | 2104.0073 | 87.9 | 1 | R.EYVNTTVGNPDGEDKPNKK.Y                        |
| 329 - 333   | 697.4610  | 696.4537  | 696.3231  | 188  | 0 | K.YFDPV.V                                      |
| 334 - 337   | 559.4703  | 558.4630  | 558.3278  | 242  | 0 | R.VWVR.E                                       |
| 346 - 360   | 1690.0950 | 1689.0877 | 1688.8482 | 142  | 1 | K.RVAEALQDFNTANQL.-                            |

Spot No.: **10**

Mascot score: **122**

Species: *Fusarium oxysporum Fo5176*

Protein name: **mitochondrial peroxiredoxin PRX1**

NCBI accession No.: **gi| 342888261** Sequence coverage %: **71**

Matched peptides No.: **15**

Total peptides No.: **71**

Calculated Mr: **25414**

Calculated *pI*: **5.86**

### Annotated PMF spectra:

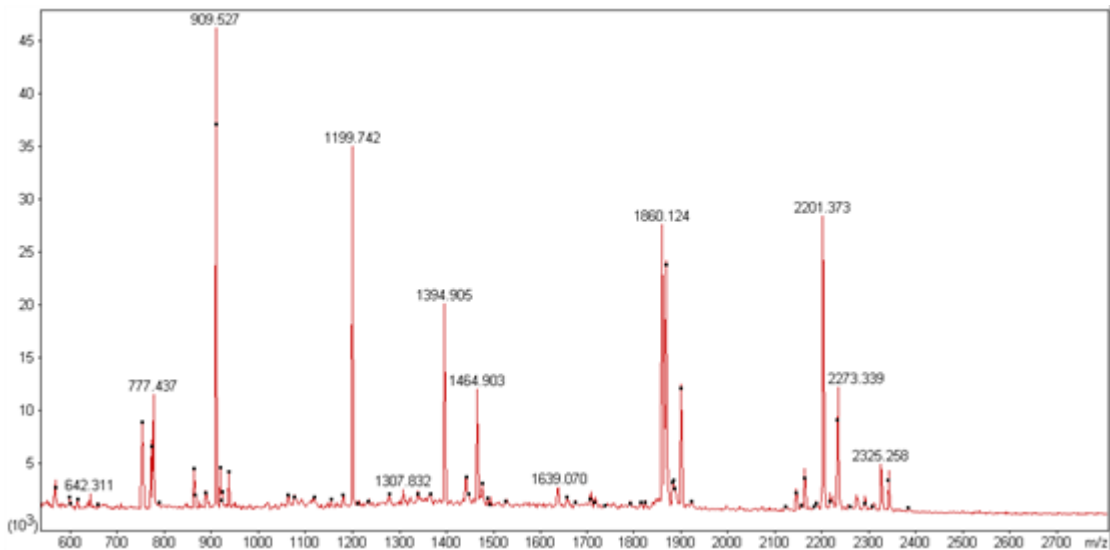

### Probability Based Mowse Score:

Protein score is  $-10 \cdot \log(P)$ , where  $P$  is the probability that the observed match is a random event. Protein scores greater than 75 are significant ( $p < 0.05$ ).

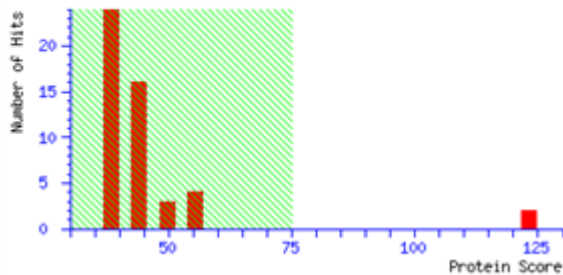

Matched peptide sequences: shown in **Bold Red**

**1 MSAPAPLRLG STAPNFQAET TKGKIDFHEF** IGDNWVILFS HPEDYTPVCT  
**51 TELGAFALQ PEFTKRGVKL IGLSANTIES** HEGWIKDIGE VTGGNVEFPI  
**101 IGDKQRQVSL LYDMIDQQDA TNVDEKGIAF** TIRSVFIIDP KKTIRTIFSY  
**151 PASTGRNAAE VLRVIDSLQT GDKYRITTP** I NWVPGEDVIV HPSVKNEEAK  
**201 TLFPEFRIVK PYLRFITPLAK** EKVLPQ

Matched peptides information:

| Start | End | Observed  | Mr (expt) | Mr (calc) | ppm   | M | Peptide                                           |
|-------|-----|-----------|-----------|-----------|-------|---|---------------------------------------------------|
| 2     | 22  | 2157.3226 | 2156.3153 | 2156.1226 | 89.4  | 1 | M.SAPAPLRLG <b>STAPNFQAETTK</b> .G                |
| 9     | 22  | 1464.9030 | 1463.8957 | 1463.7256 | 116   | 0 | R.L <b>STAPNFQAETTK</b> .G                        |
| 59    | 65  | 862.4577  | 861.4504  | 861.4596  | -10.7 | 0 | K.L <b>QPEPK</b> .R                               |
| 70    | 86  | 1868.1964 | 1867.1891 | 1866.9839 | 110   | 0 | K.LI <b>GLSANTIES</b> HEGWIK.D                    |
| 87    | 104 | 1860.1240 | 1859.1167 | 1858.9313 | 99.8  | 0 | K.D <b>IGEVTOGR</b> VEFPIIGDK.Q                   |
| 107   | 126 | 2325.2584 | 2324.2511 | 2324.0842 | 71.8  | 0 | R.QV <b>SLLYDMIDQQDA</b> TNVDEK.G                 |
| 107   | 126 | 2341.2715 | 2340.2642 | 2340.0791 | 79.1  | 0 | R.QV <b>SLLYDMIDQQDA</b> TNVDEK.G + Oxidation (0) |
| 127   | 133 | 777.4368  | 776.4295  | 776.4545  | -32.1 | 0 | K.G <b>IAFTIR</b> .S                              |
| 134   | 141 | 918.5604  | 917.5532  | 917.5222  | 33.7  | 0 | R.S <b>VFIIDPK</b> .K                             |
| 146   | 156 | 1199.7423 | 1198.7350 | 1198.5982 | 114   | 0 | R.T <b>IFSY</b> PASTGR.N                          |
| 157   | 163 | 772.4080  | 771.4007  | 771.4239  | -30.0 | 0 | R.N <b>AAEVLR</b> .V                              |
| 164   | 175 | 1394.9052 | 1393.8979 | 1393.7201 | 128   | 1 | R.V <b>IDSLQT</b> GDKYR.I                         |
| 176   | 195 | 2201.3730 | 2200.3657 | 2200.1892 | 80.2  | 0 | R.I <b>ITTPINW</b> PGEDVIVHPSVK.N                 |
| 201   | 207 | 909.5272  | 908.5199  | 908.4756  | 48.7  | 0 | K.T <b>LFPEFR</b> .I                              |
| 208   | 214 | 888.5714  | 887.5642  | 887.5593  | 5.53  | 0 | R.I <b>VKPYLR</b> .F                              |

Spot No.: **11**

Mascot score: **130**

Species: *Fusarium oxysporum f. sp. cubense race 4*

Protein name: **S-adenosylmethionine synthetase**

NCBI accession No.: **gi| 475664008**      Sequence coverage %: **48**

Matched peptides No.: **14**      Total peptides No.: **49**

Calculated Mr: **44513**      Calculated pI: **5.77**

### Annotated PMF spectra:

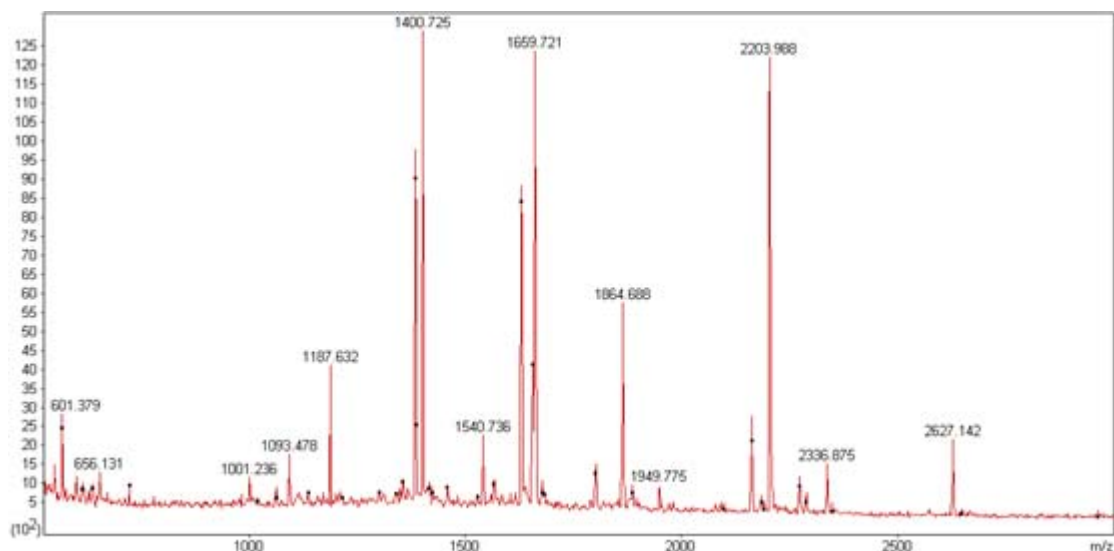

### Probability Based Mowse Score:

Protein score is  $-10 \cdot \log(P)$ , where P is the probability that the observed match is a random event. Protein scores greater than 75 are significant ( $p < 0.05$ ).

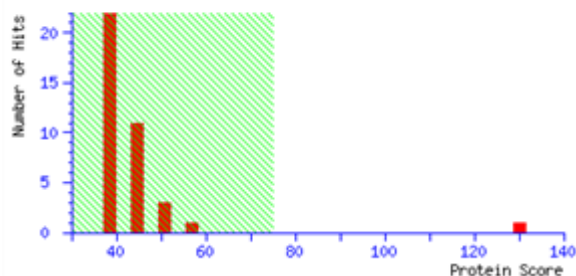

Matched peptide sequences: shown in **Bold Red**

```

1 MSATNGTNGV HAELSSWKHY NEGSFLFTSE SVGEGHPDKI ADQVSDAILD
51 ACLREDPLSK VACETATKTG MIMVFGEITT QAKLDYQKVV RDAIKDIGYD
101 DSAKGFDYKT CNLLVAIEQQ SPDIAQGLHY EKALEQLGAG DQGIMFGYAT
151 DETPELFPLT LLFAHKLNAA MSAARDGSL PWLRPDTKTQ VTIEYKHDNG
201 AVVPQRVHTV VVSAQHSPDI STEELRKEIK EKIIKKVIPA KYLSDETIYH
251 IQPSGLFIIG GPQGDAGLTG RKIIVDTYGG WGAHGGGAFS GKDFSKVDRS
301 AAVGRWIAK SLVNAKLCRR ALVQLSYAIG VAEPLSIYVD SYGTSEKTSE
351 ELVQIIRDNF DLRPGVIVRE LNLDPHIYLQ TAKNGHFGTN QSFSWEQPKE
401 LKF

```

Matched peptides information:

| Start | End | Observed  | Mr (expt) | Mr (calc) | ppm   | M | Peptide                                                   |
|-------|-----|-----------|-----------|-----------|-------|---|-----------------------------------------------------------|
| 19    | 39  | 2336.8748 | 2335.8675 | 2336.0346 | -71.5 | 0 | K.HYNEGSFLFTSESVGEGHPDK.I                                 |
| 40    | 54  | 1659.7210 | 1658.7137 | 1658.8298 | -69.9 | 0 | K.IADQVSDAILDACLR.E                                       |
| 84    | 91  | 1020.4479 | 1019.4406 | 1019.5764 | -133  | 1 | K.LDYQKVV.R.D                                             |
| 110   | 132 | 2627.1419 | 2626.1346 | 2626.3061 | -65.3 | 0 | K.TCNLLVAIEQQSPDIAQGLHYEK.A                               |
| 176   | 188 | 1540.7362 | 1539.7289 | 1539.8158 | -56.4 | 1 | R.RDGLPWLRPDK.T                                           |
| 177   | 188 | 1384.6680 | 1383.6607 | 1383.7147 | -39.0 | 0 | R.DGSLPWLRPDK.T                                           |
| 207   | 226 | 2203.9881 | 2202.9808 | 2203.1233 | -64.7 | 0 | R.VHTVVVSAQHSPDI <span style="color:red">STEELR</span> .K |
| 242   | 271 | 3175.3988 | 3174.3915 | 3174.5986 | -65.2 | 0 | K.YLSDETIYHIQPSOLFIIIGPQGDAGLTKR.K                        |
| 273   | 292 | 1949.7745 | 1948.7672 | 1948.9432 | -90.3 | 0 | K.IIVDTYGGWGAHGGGAFSGK.D                                  |
| 297   | 306 | 1093.4779 | 1092.4706 | 1092.5676 | -88.8 | 1 | K.VDRSAAYVGR.W                                            |
| 300   | 306 | 723.3985  | 722.3912  | 722.3711  | 27.8  | 0 | R.SAAYVGR.W                                               |
| 348   | 357 | 1187.6323 | 1186.6250 | 1186.6557 | -25.9 | 0 | K.TSEELVQIIR.D                                            |
| 358   | 369 | 1400.7245 | 1399.7172 | 1399.7572 | -28.6 | 0 | R.DNFDLRPGVIVR.E                                          |
| 370   | 383 | 1654.7672 | 1653.7599 | 1653.8726 | -68.1 | 0 | R.ELNLDPHIYLQ <span style="color:red">TAK</span> .N       |

Spot No.: **12**

Mascot score: **83**

Species: *Fusarium oxysporum f. sp. cubense race 1*

Protein name: **Beta-hexosaminidase subunit A1**

NCBI accession No.: **gi| 477513214**      Sequence coverage %: **29**

Matched peptides No.: **11**      Total peptides No.: **69**

Calculated Mr: **34198**      Calculated pI: **6.25**

### Annotated PMF spectra:

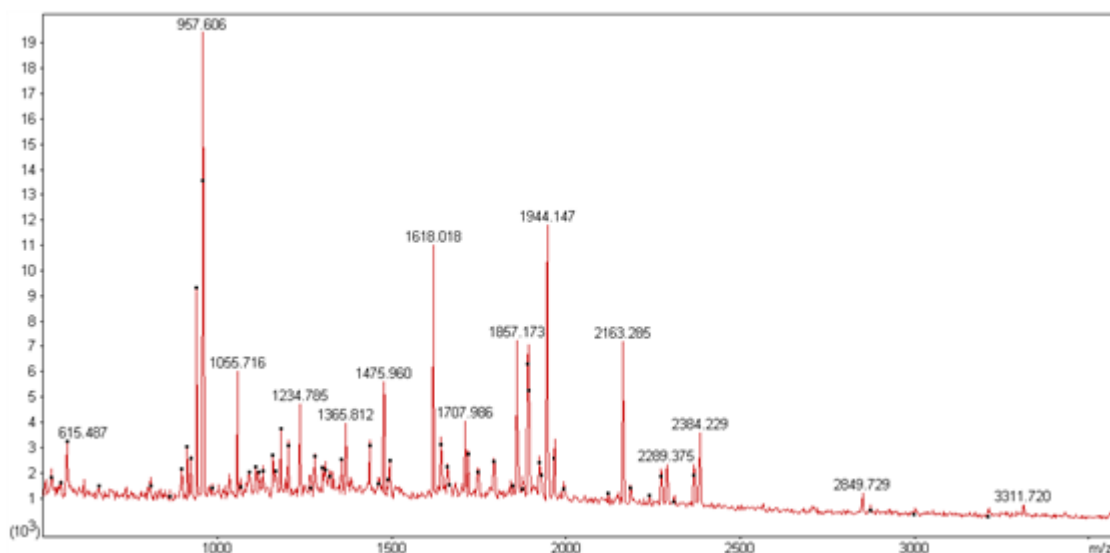

### Probability Based Mowse Score:

Protein score is  $-10 \cdot \log(P)$ , where  $P$  is the probability that the observed match is a random event. Protein scores greater than 75 are significant ( $p < 0.05$ ).

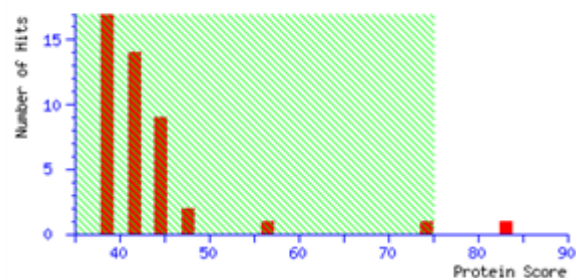



Matched peptide sequences: shown in **Bold Red**

1 **MASNLYPHRG** **FMLDTGR**KFF PVKAILHLLT LLHQYNFNVF HWHIYDAESF  
 51 PLLWPAGEGL TNASVKYSQT HTYYTPSDIQ NVISYAENLG ILVYPETDMP  
 101 GHSDIWGIWK KDLVVGKASL **KKPDALDIR** QNNK**QVYDYI** RSLVSTVDGY  
 151 FGSPYHHFVG DEVAYMWNTR DDNKLFNLSFL NWLKTLPK**K** **SVILWDDPLT**  
 201 **DSEKSITLSE** **DWIIQTWHKG** TTQKILKKGH **RVIVSEDTF** **YIGNADADKI**  
 251 **SSFVFPKSSK** VLGFEVAVFT SQDDDPDDLQ QDWIIDPLKA ASKIRRK

Matched peptides information:

| Start - End | Observed  | Mr (expt) | Mr (calc) | ppm | M | Peptide                       |
|-------------|-----------|-----------|-----------|-----|---|-------------------------------|
| 2 - 9       | 957.6061  | 956.5988  | 956.4828  | 121 | 0 | M.ASNLYPHR.G                  |
| 10 - 17     | 896.5362  | 895.5289  | 895.4222  | 119 | 0 | R.GFMLDTGR.K                  |
| 10 - 17     | 912.5459  | 911.5386  | 911.4171  | 133 | 0 | R.GFMLDTGR.K + Oxidation (O)  |
| 122 - 130   | 1055.7156 | 1054.7083 | 1054.5771 | 124 | 0 | K.KPDALDIR.Q                  |
| 135 - 141   | 956.6043  | 955.5970  | 955.4763  | 126 | 0 | K.QVYDYIR.S                   |
| 190 - 204   | 1746.0961 | 1745.0888 | 1744.8883 | 115 | 1 | K.KSVILWDDPLTDSEK.S           |
| 191 - 204   | 1618.0175 | 1617.0102 | 1616.7934 | 134 | 0 | K.SVILWDDPLTDSEK.S            |
| 205 - 219   | 1857.1735 | 1856.1662 | 1855.9468 | 118 | 0 | K.SITLSEDWIIQTWEK.G           |
| 232 - 249   | 1944.1469 | 1943.1396 | 1942.9160 | 115 | 0 | R.VIVSEDTFYIGNADADK.I         |
| 232 - 257   | 2849.7288 | 2848.7215 | 2848.4171 | 107 | 1 | R.VIVSEDTFYIGNADADKISSFVFPK.S |
| 250 - 257   | 924.6485  | 923.6412  | 923.5117  | 140 | 0 | K.ISSFVFPK.S                  |

Spot No.: **13**

Mascot score: **76**

Species: *Fusarium oxysporum f. sp. cubense race 4*

Protein name: **phosphoglycerate kinase**

NCBI accession No.: **gi| 475667960**      Sequence coverage %: **48**

Matched peptides No.: **16**      Total peptides No.: **111**

Calculated Mr: **44835**      Calculated pI: **5.77**

### Annotated PMF spectra:

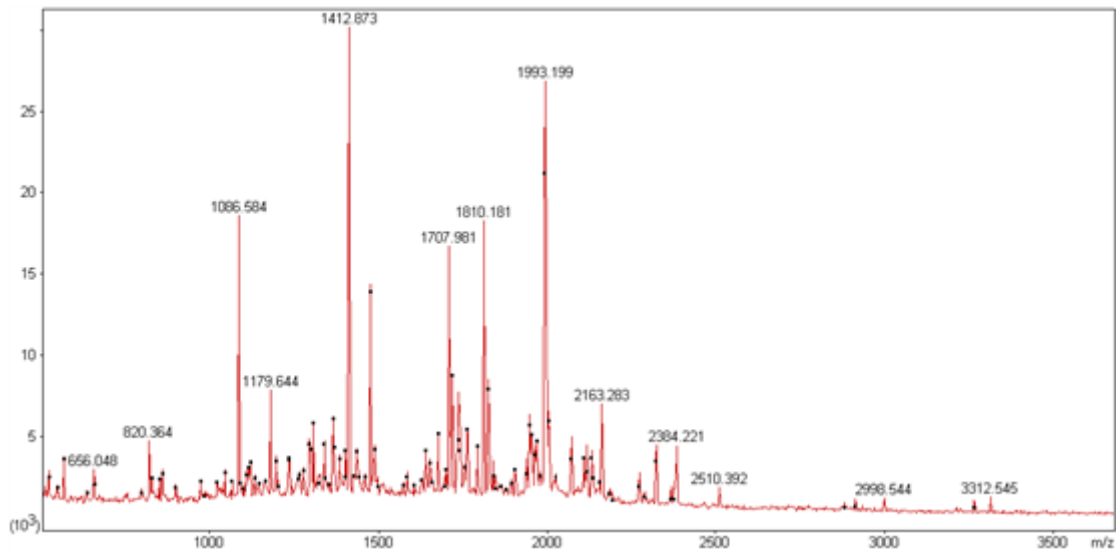

### Probability Based Mowse Score:

Protein score is  $-10 \cdot \log(P)$ , where P is the probability that the observed match is a random event. Protein scores greater than 75 are significant ( $p < 0.05$ ).

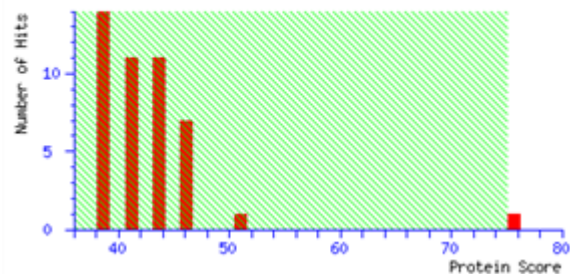

## Matched peptide sequences: shown in **Bold Red**

```

1  MSLSNKLSIT DVDVKGKRVL IRVDFNVPLD ADKNITNNQR IVGALPTIKY
51 ALENGAKSVI LMSHLGRPNG SPNEKYSLKP VVPELEKLLG KKVTFAPDCV
101 GPEVEEIVNK AEDGAVILLE NLRFHIEEEG SSKDKEGNKT KADKAQVEAF
151 RKGLTALGDV YINDAFGTAH RAHSSMVGVD LPQKASGFLV KKELEYFAKA
201 LEEPQRPFLA ILGGAKVSDK IQLIDNLLDK VNTLIICGGM AFTFKKTLEG
251 VSIGNSLFDE AGSKTVGNLV EKAKAKGVKL VLPVDYITAD KFDKDANTGY
301 ATDKDGIPDG WQGLDCGEES VKLYKEAIAE AKTILWNGPA GVFEFEKFAS
351 GTKATLDAVV DAVQKDGKIV IIGGGDTATV AKKYGVEDKL SHVSTGGGAS
401 LELLEKKELP GVTALSSK

```

## Matched peptides information:

| Start - End | Observed  | Mr(expt)  | Mr(calc)  | ppm   | M | Peptide                          |
|-------------|-----------|-----------|-----------|-------|---|----------------------------------|
| 23 - 33     | 1232.6628 | 1231.6555 | 1231.6085 | 38.2  | 0 | R.VDFNVPLDADK.H                  |
| 23 - 40     | 2073.2328 | 2072.2255 | 2072.0287 | 95.0  | 1 | R.VDFNVPLDADIKITNNQR.I           |
| 34 - 40     | 859.4081  | 858.4008  | 858.4308  | -34.9 | 0 | K.NITNNQR.I                      |
| 76 - 87     | 1401.8251 | 1400.8178 | 1400.7915 | 18.8  | 0 | K.YSLKPVVPELEK.L                 |
| 93 - 110    | 2003.1665 | 2002.1592 | 2001.9718 | 93.6  | 0 | K.VTFAPDCVGPVEEIVNK.A            |
| 111 - 123   | 1412.8730 | 1411.8657 | 1411.7671 | 69.9  | 0 | K.AEDGAVILLENLR.F                |
| 145 - 151   | 820.3642  | 819.3569  | 819.4239  | -81.7 | 0 | K.AQVEAFR.K                      |
| 153 - 171   | 1991.1904 | 1990.1831 | 1989.9908 | 96.6  | 0 | K.GLTLALGDVYINDAFGTAER.A         |
| 172 - 184   | 1368.7439 | 1367.7366 | 1367.6867 | 36.5  | 0 | R.AHSSMVGVDLPQK.A                |
| 193 - 199   | 899.3770  | 898.3698  | 898.4436  | -82.2 | 0 | K.ELEYFAK.A                      |
| 200 - 216   | 1810.1811 | 1809.1738 | 1809.0148 | 87.9  | 0 | K.ALEEPQRPFLAILOGAK.V            |
| 247 - 264   | 1824.0543 | 1823.0470 | 1822.8949 | 83.5  | 0 | K.TLEGVVSIGNSLFDEAGSK.T          |
| 295 - 322   | 2998.5436 | 2997.5363 | 2997.2934 | 81.0  | 1 | K.DANTGYATDRDGI PDGQGLDCGEESVK.L |
| 305 - 322   | 1962.0972 | 1961.0899 | 1960.8473 | 124   | 0 | K.DGIPDGMQGLDCGEESVK.L           |
| 333 - 347   | 1707.9813 | 1706.9740 | 1706.8668 | 62.8  | 0 | K.TILWNGPAQVFEFEK.F              |
| 390 - 407   | 1755.0576 | 1754.0503 | 1753.9210 | 73.7  | 0 | K.LSHVSTGGGASLELLEK.E            |

Spot No.: **14**

Mascot score: **80**

Species: *Fusarium oxysporum f. sp. cubense race 1*

Protein name: **beta-hexosaminidase**

NCBI accession No.: **gi| 477513214**      Sequence coverage %: **26**

Matched peptides No.: **10**      Total peptides No.: **68**

Calculated Mr: **34198**      Calculated pI: **6.25**

### Annotated PMF spectra:

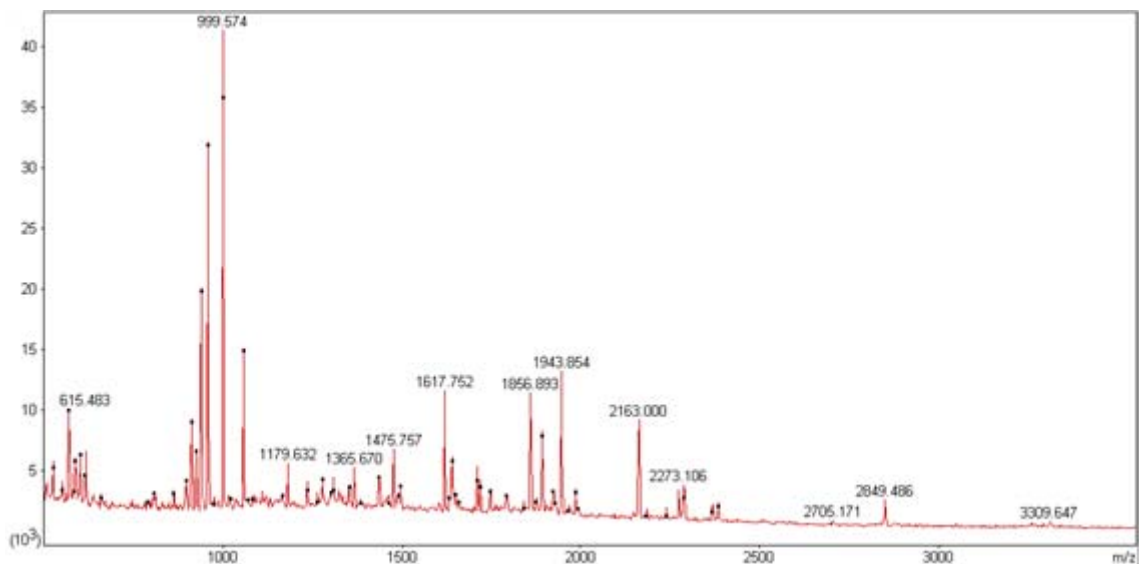

### Probability Based Mowse Score:

Protein score is  $-10 \cdot \log(P)$ , where P is the probability that the observed match is a random event. Protein scores greater than 75 are significant ( $p < 0.05$ ).

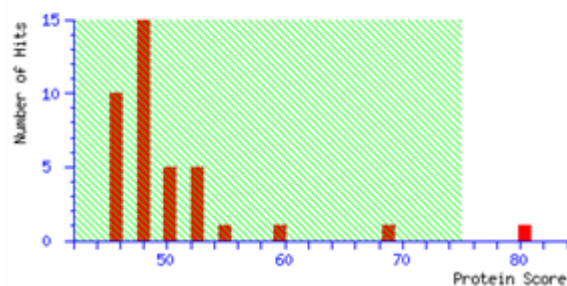

Matched peptide sequences: shown in **Bold Red**

1 MASNLYPHRG **FMLDTGR**KFF PVKAILHLLT LLHQYNFNVF HWHIYDAESF  
 51 PLLWPAGEGL TNASVKYSQT HTYYTPSDIQ NVISYAENLG ILVYPETDMP  
 101 GHSDIWGIWK KDLVVGKASL **KKPD****Q****LDIR** QNNK**Q****VYDYI** RSLVSTVDGY  
 151 FGSPYHHFGG DEVAYMWNTR DDNKLFNLSFL NWLKTLPK**K** **SVILWDDPLT**  
 201 **DSEKSITLSE** **DWIIQ****TWHK**G TTQKILKKGH **RVIVSESDTF** **YIGNADADKI**  
 251 **SSFVFPK**SSK VLGFEVAWFT SQDDPSDLD QDWIIDPLKA ASKIRRK

Matched peptides information:

| Start | End | Observed  | Mr (expt) | Mr (calc) | ppm   | M | Peptide                                         |
|-------|-----|-----------|-----------|-----------|-------|---|-------------------------------------------------|
| 10    | 17  | 896.4766  | 895.4693  | 895.4222  | 52.6  | 0 | R.GFMLDTGR.K                                    |
| 10    | 17  | 912.4834  | 911.4761  | 911.4171  | 64.7  | 0 | R.GFMLDTGR.K + Oxidation (O)                    |
| 122   | 130 | 1055.6256 | 1054.6183 | 1054.5771 | 39.1  | 0 | K.KPD <b>Q</b> <b>LDIR</b> .Q                   |
| 135   | 141 | 956.5580  | 955.5507  | 955.4763  | 77.9  | 0 | K. <b>Q</b> <b>VYDYI</b> .S                     |
| 190   | 204 | 1745.8459 | 1744.8386 | 1744.8883 | -28.5 | 1 | K.K <b>SVILWDDPLT</b> <b>DSEK</b> .S            |
| 191   | 204 | 1617.7520 | 1616.7447 | 1616.7934 | -30.1 | 0 | K. <b>SVILWDDPLT</b> <b>DSEK</b> .S             |
| 205   | 219 | 1856.8935 | 1855.8862 | 1855.9468 | -32.7 | 0 | K. <b>SITLSE</b> <b>DWIIQ</b> <b>TWHK</b> .G    |
| 232   | 249 | 1943.8538 | 1942.8465 | 1942.9160 | -35.8 | 0 | R. <b>VIVSESDTF</b> <b>YIGNADADK</b> .I         |
| 232   | 257 | 2849.4856 | 2848.4783 | 2848.4171 | 21.5  | 1 | R. <b>VIVSESDTF</b> <b>YIGNADADKISSFVFPK</b> .S |
| 250   | 257 | 924.5606  | 923.5533  | 923.5117  | 45.1  | 0 | K. <b>ISSFVFPK</b> .S                           |

Spot No.: **15**

Mascot score: **106**

Species: *Fusarium oxysporum f. sp. cubense race 1*

Protein name: **Superoxide dismutase [Mn], mitochondrial**

NCBI accession No.: **gi| 477512799**      Sequence coverage %: **51**

Matched peptides No.: **12**      Total peptides No.: **53**

Calculated Mr: **21308**      Calculated pI: **7.07**

### Annotated PMF spectra:

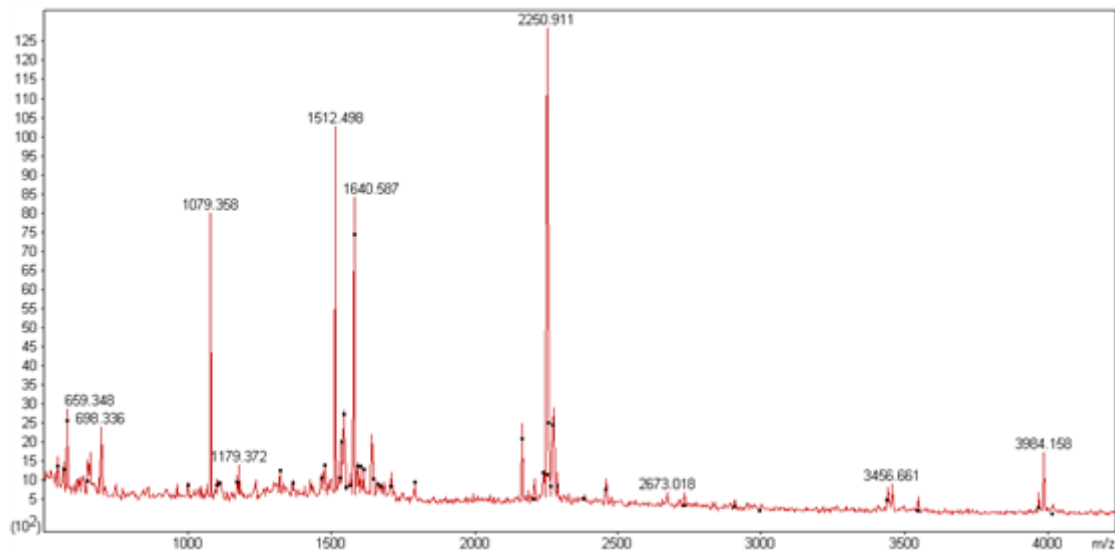

### Probability Based Mowse Score:

Protein score is  $-10 \cdot \log(P)$ , where P is the probability that the observed match is a random event. Protein scores greater than 75 are significant ( $p < 0.05$ ).

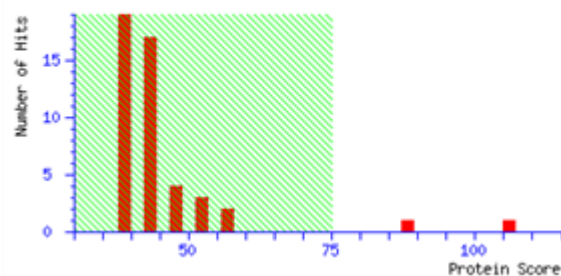

Matched peptide sequences: shown in **Bold Red**

1 MSVGTYSLPA LPYAYDALEP SISAQIMELH HSK**HHQAYVT** NLNAALKNYA  
 51 **TATSTNDIAG QIALQSAIKF** NGGGHINHSL FWENLSPSSS ADAKPESAPT  
 101 LSAEISK**TWG SIQAFQEAFK** KTLGLQSG WGWLVKDTHG LRIVTTKDQD  
 151 PVVGGEYLNG **KAAYVDNIWK VINWKTAEAR FTGTREDAFK** VLRASI

Matched peptides information:

| Start - End | Observed  | Mr (expt) | Mr (calc) | ppm   | M | Peptide                    |
|-------------|-----------|-----------|-----------|-------|---|----------------------------|
| 34 - 47     | 1579.5590 | 1578.5517 | 1578.8266 | -174  | 0 | K.HHQAYVTNLNAALK.N         |
| 48 - 69     | 2250.9106 | 2249.9033 | 2250.1492 | -109  | 0 | K.NYATATSTNDIAQQIALQSAIK.F |
| 48 - 69     | 2251.3287 | 2250.3214 | 2250.1492 | 76.6  | 0 | K.NYATATSTNDIAQQIALQSAIK.F |
| 108 - 120   | 1512.4980 | 1511.4907 | 1511.7409 | -165  | 0 | K.TWQSIQAFQEAFK.K          |
| 108 - 121   | 1640.5868 | 1639.5795 | 1639.8358 | -156  | 1 | K.TWQSIQAFQEAFK.T          |
| 122 - 136   | 1614.6075 | 1613.6002 | 1613.8930 | -181  | 0 | K.TLLGLQSGWGWLVK.D         |
| 137 - 142   | 698.3360  | 697.3287  | 697.3507  | -31.6 | 0 | K.DTHGLR.I                 |
| 162 - 170   | 1079.3579 | 1078.3506 | 1078.5447 | -180  | 0 | K.AAYVDNIWK.V              |
| 171 - 175   | 659.3476  | 658.3403  | 658.3802  | -60.6 | 0 | K.VINWK.T                  |
| 176 - 180   | 547.3163  | 546.3090  | 546.2762  | 60.1  | 0 | K.TAEAR.F                  |
| 181 - 185   | 581.3129  | 580.3056  | 580.2969  | 14.9  | 0 | R.FTQTR.E                  |
| 181 - 190   | 1171.3548 | 1170.3475 | 1170.5669 | -187  | 1 | R.FTGTREDAFK.V             |

Spot No.: **16**

Mascot score: **78**

Species: *Fusarium oxysporum*

Protein name: **lactonohydrolase**

NCBI accession No.: **gi| 3810873**      Sequence coverage %: **31**

Matched peptides No.: **10**      Total peptides No.: **68**

Calculated Mr: **43237**      Calculated pI: **5.10**

### Annotated PMF spectra:

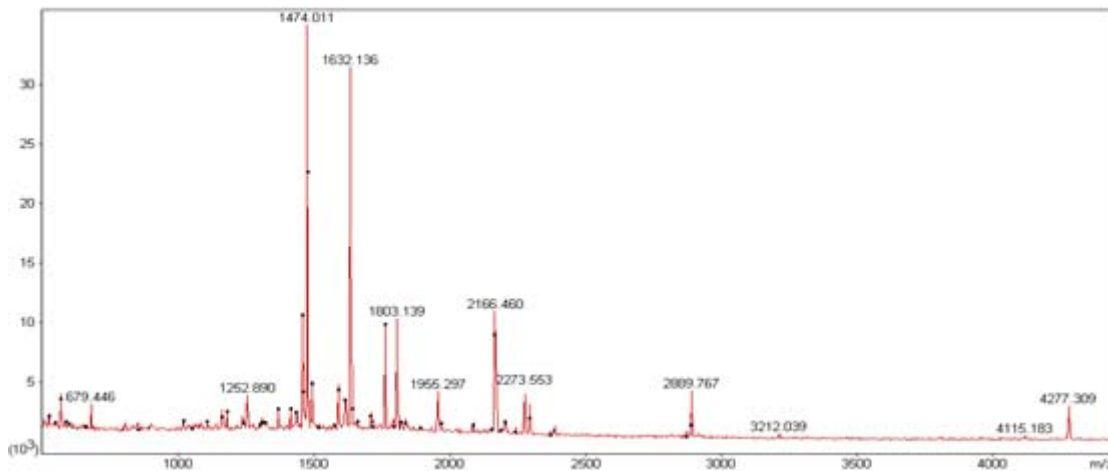

### Probability Based Mowse Score:

Protein score is  $-10 \cdot \log(P)$ , where P is the probability that the observed match is a random event. Protein scores greater than 75 are significant ( $p < 0.05$ ).

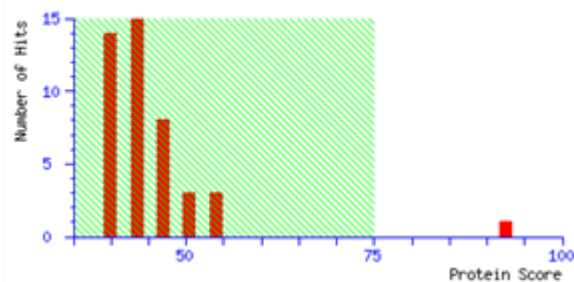



Matched peptide sequences: shown in **Bold Red**

```

1  MPSSISVLAG  VLVPVLGAVA  AKLPSTAQII  DQKSFNVLKD  VPPPAVANDS
51  LVFTWPGVTE  ESLVEKPFHV  YDEEFYDVIG  KDPSLTLIAT  SDTDPIFHEA
101 VVWYPPTEEV  FFVQNAGAPA  AGTGLNKSSI  IQKISLKEAD  AVRKGKQDEV
151 KVTVVDSNPQ  VINPNGGTY  Y  KGNIIFAGEG  QGDDVPSALY  LMNPLPPYNT
201 TLLNLYFGR  QFNSLNDVGI  NPRNGDLYFT  DTLYGYLQDF  RPVPLGRNQV
251 YRYNFDTGAV  TVVADDETL  PNIGFGPDGK  KVYVTDGTGIA  LGFYGRNLSS
301 PASVYSFDVN  QDGTLQNRKT  FAYVASFIPD  GVHTDSKGRV  YAGCGDGVHV
351 WNPSGKLIK  IYTGTVAA  NFQFAGKGRMII  TGQTKLFYVT  LGASGPKLYD

```

Matched peptides information:

| Start | End | Observed  | Mr (expt) | Mr (calc) | ppm | M | Peptide                                   |
|-------|-----|-----------|-----------|-----------|-----|---|-------------------------------------------|
| 211   | 223 | 1474.0106 | 1473.0033 | 1472.7372 | 181 | 0 | R. <b>QFNSLNDVGINPR</b> .N                |
| 248   | 252 | 679.4460  | 678.4387  | 678.3449  | 138 | 0 | R. <b>NQVYR</b> .Y                        |
| 253   | 280 | 2887.8779 | 2886.8706 | 2886.3713 | 173 | 0 | R. <b>YRYNFDGAVTVVADDETLPNIGFGPDGK</b> .K |
| 281   | 296 | 1760.2485 | 1759.2412 | 1758.9305 | 177 | 1 | K. <b>KVYVTDGTGIALGFYGR</b> .N            |
| 282   | 296 | 1632.1362 | 1631.1289 | 1630.8355 | 180 | 0 | K. <b>VYVTDGTGIALGFYGR</b> .N             |
| 319   | 337 | 2083.4148 | 2082.4075 | 2082.0422 | 175 | 1 | R. <b>KTFAYVASFIPDGVHTDSK</b> .G          |
| 320   | 337 | 1955.2970 | 1954.2897 | 1953.9473 | 175 | 0 | K. <b>TFAYVASFIPDGVHTDSK</b> .G           |
| 340   | 356 | 1803.1394 | 1802.1321 | 1801.8206 | 173 | 0 | R. <b>VYAGCGDGVWNP</b> SGK.L              |
| 361   | 375 | 1588.0773 | 1587.0700 | 1586.8093 | 164 | 0 | K. <b>IYTGTVAA</b> NFQFAGK.G              |
| 386   | 397 | 1252.8903 | 1251.8830 | 1251.6863 | 157 | 0 | K. <b>LPYVTLGASGPK</b> .L                 |

Spot No.: **17**

Mascot score: **135**

Species: *Fusarium oxysporum Fo5176*

Protein name: **serine carboxypeptidase S28**

NCBI accession No.: **gi| 342878892**      Sequence coverage %: **41**

Matched peptides No.: **21**      Total peptides No.: **70**

Calculated Mr: **59955**      Calculated pI: **6.04**

### Annotated PMF spectra:

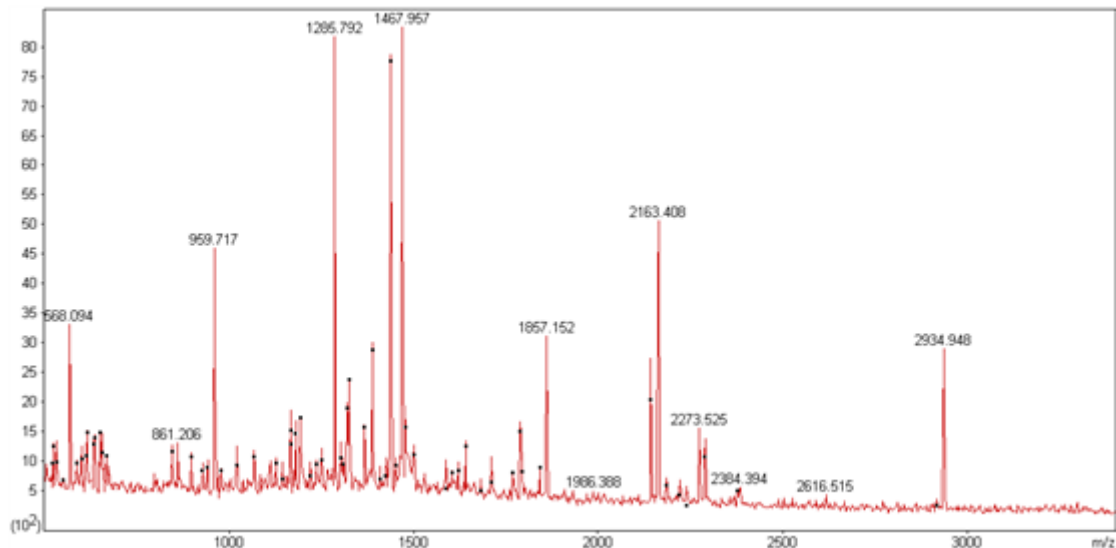

### Probability Based Mowse Score:

Protein score is  $-10 \cdot \log(P)$ , where P is the probability that the observed match is a random event. Protein scores greater than 75 are significant ( $p < 0.05$ ).

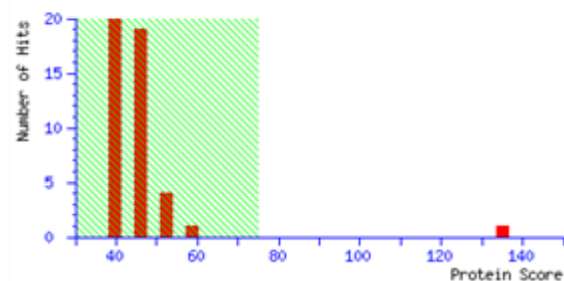

## Matched peptide sequences: shown in **Bold Red**

1 **MWFAGCASAA** **LLALTARGSA** **YSIPALSARA** **SSDSGSIKVH** **NISVPVDHVF**  
 51 **NETKYEPHSD** **KKFPLRYWFD** **AQHYREGGPV** **IILASGETSG** **EDRIPFLEHG**  
 101 **ILKMLANATG** **GVGVILEHRY** **YGTSFPVVDL** **KTKNLRFLST** **EQALADTAYF**  
 151 **AEHVKFPGLE** **KHNLTASNTP** **YIIYGGSYAG** **AFAAFARKIY** **PEVFWGGISS**  
 201 **SGVTEAIIIDY** **WEYFEARLF** **APGDCAKVTQ** **KLTQVVDKIL** **TGSDKEEKKQ**  
 251 **LKIAFGLLGL** **RDDDFASTIS** **RGIQGLQGNN** **WDPAQDSDPF** **GIYCGSVSSD**  
 301 **ALLYASTRPL** **TPYVKKWLSA** **HANKNDVKYL** **TNRFLNYIGY** **MRSNVESDKQ**  
 351 **GGCQQQTVNE** **CYSIREMYSS** **TSLNPASSGR** **QWTYQICTIQW** **GYWQTGSGVP**  
 401 **KNQLPLVSR** **VDVEFSTIPC** **RQEFNITAEP** **DVESINKLGG** **WNFSYPRVAF**  
 451 **IDGEYDPWRA** **ATPHKIGLAP** **RKSTASEPFI** **LIPYGVHHWD** **ENGLDPNATE**  
 501 **IGLPPPAVAK** **AQQDIVDFTK** **AWLEEYEKEK** **GKRANL**

## Matched peptides information:

| Start - End | Observed  | Mr (expt) | Mr (calc) | ppm  | M | Peptide                             |
|-------------|-----------|-----------|-----------|------|---|-------------------------------------|
| 2 - 17      | 1679.1532 | 1678.1459 | 1677.8661 | 167  | 0 | M.WFAGCASAAALLALTAR.G               |
| 18 - 29     | 1192.7332 | 1191.7259 | 1191.6248 | 84.9 | 0 | R.GSAYSIPALSAR.A                    |
| 63 - 66     | 532.2521  | 531.2448  | 531.3169  | -136 | 0 | K.FPLR.Y                            |
| 67 - 75     | 1285.7917 | 1284.7844 | 1284.5676 | 169  | 0 | R.YWFDAQHYR.E                       |
| 76 - 93     | 1787.2184 | 1786.2111 | 1785.8745 | 189  | 0 | R.EGGPVIIASGETSGEDR.I               |
| 76 - 103    | 2934.9482 | 2933.9409 | 2933.5498 | 133  | 1 | R.EGGPVIIASGETSGEDRIPFLEHGILK.M     |
| 120 - 131   | 1386.8980 | 1385.8907 | 1385.6867 | 147  | 0 | R.YYGTSFPVVDLK.T                    |
| 137 - 155   | 2141.4238 | 2140.4165 | 2140.0477 | 172  | 0 | R.FLSTEQALADTAYFAEHWK.F             |
| 219 - 227   | 978.5639  | 977.5566  | 977.4641  | 94.7 | 0 | R.LFAPGDCAK.V                       |
| 253 - 261   | 959.7170  | 958.7097  | 958.5964  | 118  | 0 | K.IAFOLLGLR.D                       |
| 262 - 271   | 1126.6971 | 1125.6898 | 1125.4938 | 174  | 0 | R.DDFASTISR.G                       |
| 329 - 333   | 666.2680  | 665.2607  | 665.3497  | -134 | 0 | K.YLTHR.F                           |
| 329 - 342   | 1840.1351 | 1839.1278 | 1838.9137 | 116  | 1 | K.YLTHRFLNYIGYMR.S + Oxidation (0)  |
| 343 - 365   | 2616.5151 | 2615.5078 | 2615.1340 | 143  | 1 | R.SNVESDKQQGQQQTVNRCYSIR.E          |
| 350 - 365   | 1857.1523 | 1856.1450 | 1855.7941 | 189  | 0 | K.QGQQQQTVNRCYSIR.E                 |
| 366 - 380   | 1603.0204 | 1602.0131 | 1601.6991 | 196  | 0 | R.EMYSSTSLNPASSGR.Q + Oxidation (0) |
| 402 - 409   | 926.5858  | 925.5785  | 925.5345  | 47.6 | 0 | K.NQLPLVSR.L                        |
| 410 - 421   | 1435.9761 | 1434.9688 | 1434.7177 | 175  | 0 | R.LVDVEFSTIPCR.Q                    |
| 448 - 459   | 1467.9574 | 1466.9501 | 1466.6830 | 182  | 0 | R.VAFIDGEYDPWR.A                    |
| 521 - 528   | 1067.5862 | 1066.5789 | 1066.4971 | 76.7 | 0 | K.AWLEEYEK.E                        |
| 521 - 530   | 1324.8525 | 1323.8452 | 1323.6346 | 159  | 1 | K.AWLEEYEKEK.G                      |

Spot No.: **18**

Mascot score: **88**

Species: *Fusarium oxysporum f. sp. cubense race 4*

Protein name: **O-acetylhomoserine (thiol)-lyase-like protein**

NCBI accession No.: **gi| 475675629**      Sequence coverage %: **42**

Matched peptides No.: **13**      Total peptides No.: **52**

Calculated Mr: **47110**      Calculated pI: **5.89**

### Annotated PMF spectra:

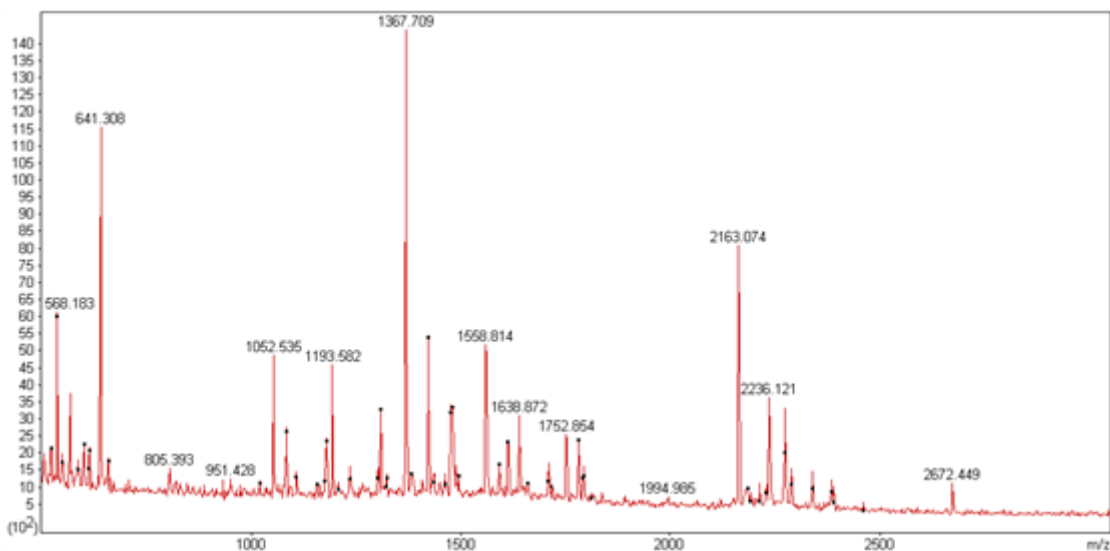

### Probability Based Mowse Score:

Protein score is  $-10 \cdot \log(P)$ , where P is the probability that the observed match is a random event. Protein scores greater than 75 are significant ( $p < 0.05$ ).

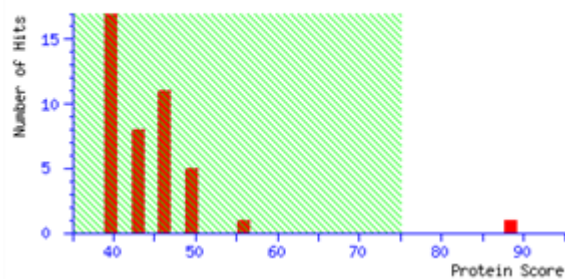

## Matched peptide sequences: shown in **Bold Red**

```

1 MAEQVFQNF E TLQLHAGYTP DPHTRSTAVP IYATSSYTFN DSAHGARLFG
51 LKELGNIYSR LMNPTVDVFE KRIAALGGI AAAATSSGQA AQFLTIATLA
101 KAGDNIVASS HLGGTYNQ NVLLPRFGIK TKFVRSKGLE DYAAAIDDQT
151 RAIYVESMSN PDYVVPDFEG IAKIAHEHGI PLVVDNTLGA GGYYVRPIEH
201 GADIVVHSAT KWIGGHGTTI GGVIVDSGRF NWNKHSDRFP EMVEPSPSYH
251 GLKYWEAFGP ATFITRIRVE MLRDIGACLS PFSAQQLLLG IETLGLRAER
301 HAQNTKLA YFESSPNVSW VLWPGSESH TYAQAKKYL RGFGAMLSIG
351 VKGDAASAGS VVDGLKLVSN LANVGDAKSL AIHPWSTTHE QLSEDERLAS
401 GVTEDMIRIS VGIEHVDDII ADFEQSFQKA YGS

```

## Matched peptides information:

| Start - End | Observed  | Mr (expt) | Mr (calc) | ppm   | M | Peptide                                    |
|-------------|-----------|-----------|-----------|-------|---|--------------------------------------------|
| 53 - 60     | 951.4283  | 950.4210  | 950.4821  | -64.3 | 0 | K.ELGNIYSR.L                               |
| 61 - 71     | 1308.6721 | 1307.6648 | 1307.6431 | 16.6  | 0 | R.LMNPTVDVFEK.R + Oxidation (0)            |
| 102 - 126   | 2672.4486 | 2671.4413 | 2671.3718 | 26.0  | 0 | K.AGDNIVASSHLGGTYNQLNVLPR.F                |
| 136 - 151   | 1752.8544 | 1751.8471 | 1751.8326 | 8.30  | 1 | R.SGKLEDYAAAIDDQTR.A                       |
| 139 - 151   | 1480.7106 | 1479.7033 | 1479.6841 | 13.0  | 0 | K.LEDYAAAIDDQTR.A                          |
| 152 - 173   | 2460.2713 | 2459.2640 | 2459.1566 | 43.7  | 0 | R.AIYVESMSNPDYVVPDFEGIAK.I + Oxidation (0) |
| 212 - 229   | 1781.9500 | 1780.9427 | 1780.9221 | 11.6  | 0 | K.WIGGHGTTIGGVIVDSGR.F                     |
| 235 - 253   | 2213.1083 | 2212.1010 | 2212.0371 | 28.9  | 1 | K.HSDRFFEMVEPSPSYHGLK.Y                    |
| 235 - 253   | 2229.0744 | 2228.0671 | 2228.0320 | 15.7  | 1 | K.HSDRFFEMVEPSPSYHGLK.Y + Oxidation (0)    |
| 254 - 266   | 1558.8139 | 1557.8066 | 1557.7616 | 28.9  | 0 | K.YWEAFGPATFITR.I                          |
| 379 - 397   | 2236.1213 | 2235.1140 | 2235.0556 | 26.1  | 0 | K.SLAHPWSTTHEQLSEDER.L                     |
| 398 - 408   | 1207.5815 | 1206.5742 | 1206.5914 | -14.3 | 0 | R.LASGVTEDMIR.I + Oxidation (0)            |
| 409 - 429   | 2390.2612 | 2389.2539 | 2389.1802 | 30.9  | 0 | R.ISVGIHVDDIADFEQSFQKA                     |

Spot No.: **19**

Mascot score: **104**

Species: *Fusarium oxysporum f. sp. cubense race 1*

Protein name: **homoserine dehydrogenase**

NCBI accession No.: **gi| 477517374**      Sequence coverage %: **50**

Matched peptides No.: **12**      Total peptides No.: **38**

Calculated Mr: **38547**      Calculated pI: **6.24**

### Annotated PMF spectra:

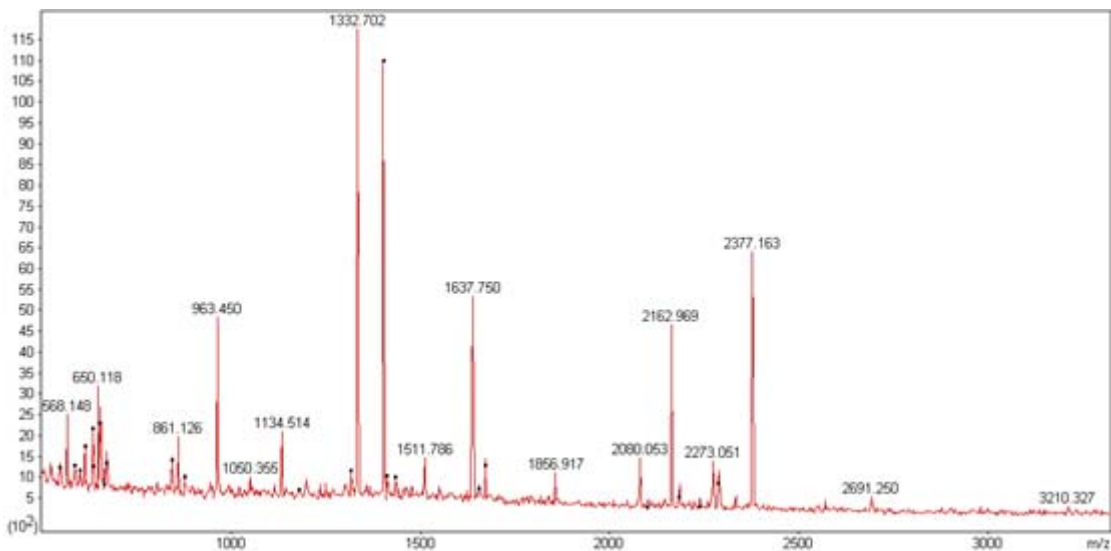

### Probability Based Mowse Score:

Protein score is  $-10 \cdot \log(P)$ , where P is the probability that the observed match is a random event. Protein scores greater than 75 are significant ( $p < 0.05$ ).

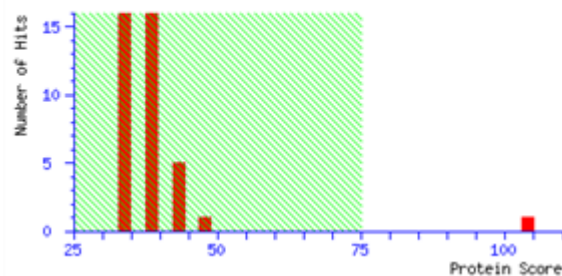

Matched peptide sequences: shown in **Bold Red**

```

1  MAAPKQVFIG IIGAGGVGKA FIDQLQSLAA RKPSPKLNLA YIATSRKALF
51 NDDYSPLNIG NVIETLGSST KAPLALPQVV EYLAKAPAKS VLVDNTSSQD
101 VAELYPLALS RGISIVTPNK KAFSGSYKLW QDIFSAAESS GARVYHESSV
151 GAGLPVISTL KDLVETGDKV TKIEGVFSGT MSFLFNSFAP TEGQGGKWSE
201 EVKKAKSLGY TEPDPRDDLN GLDVARKLTI LARLAGIPVE SPTSFPVQSL
251 IPKELESVSS GDEFLQKLPA FDSQMEETKA AAEKAGKVVR FVGSIDAASK
301 QVKVGLQFD RSHPIAALKG SDNIISFYTE RYGSNPLIVQ GAGAGGDVTA
351 MGVTADLIKV LSQIA

```

Matched peptides information:

| Start - End | Observed  | Mr (expt) | Mr (calc) | ppm   | M | Peptide                                                  |
|-------------|-----------|-----------|-----------|-------|---|----------------------------------------------------------|
| 6 - 19      | 1315.6623 | 1314.6550 | 1314.7660 | -84.4 | 0 | K.QVFIGIIGAGGVGK.A                                       |
| 20 - 31     | 1332.7020 | 1331.6947 | 1331.7197 | -18.8 | 0 | K.AFIDQLQSLAAR.K                                         |
| 72 - 85     | 1511.7862 | 1510.7789 | 1510.8759 | -64.2 | 0 | K.APLALPQVVEYLAK.A                                       |
| 90 - 111    | 2377.1631 | 2376.1558 | 2376.2173 | -25.9 | 0 | K.SVLVDNTSSQOVAELYPLALSR.G                               |
| 129 - 143   | 1637.7497 | 1636.7424 | 1636.7845 | -25.7 | 0 | K.LMQDIFSAAESSGAR.V                                      |
| 144 - 161   | 1856.9167 | 1855.9094 | 1856.0044 | -51.2 | 0 | R.VYHESSVAGGLPVISTLK.D                                   |
| 207 - 216   | 1134.5143 | 1133.5070 | 1133.5353 | -24.9 | 0 | K.SLGYTEPDPR.D                                           |
| 234 - 253   | 2080.0532 | 2079.0459 | 2079.1616 | -55.6 | 0 | R.LAGIPVESPTSFPVQSLIPK.E                                 |
| 268 - 279   | 1411.6018 | 1410.5945 | 1410.6337 | -27.8 | 0 | K.LPAFDSQMEETK.A + Oxidation (0)                         |
| 304 - 311   | 963.4501  | 962.4428  | 962.4821  | -40.9 | 0 | K.VGLEQFDR.S                                             |
| 320 - 331   | 1401.6396 | 1400.6323 | 1400.6572 | -17.8 | 0 | K.GSDNIISFYTER.Y                                         |
| 332 - 359   | 2691.2500 | 2690.2427 | 2690.3586 | -43.1 | 0 | R.YGSNPLIVQGAGAGGDVTA <u>MGVTADLIK.V</u> + Oxidation (0) |

Spot No.: **20**

Mascot score: **121**

Species: *Fusarium oxysporum f. sp. cubense race 4*

Protein name: **glutathione reductase**

NCBI accession No.: **gi| 475671099**      Sequence coverage %: **67**

Matched peptides No.: **19**      Total peptides No.: **76**

Calculated Mr: **51031**      Calculated pI: **6.06**

### Annotated PMF spectra:

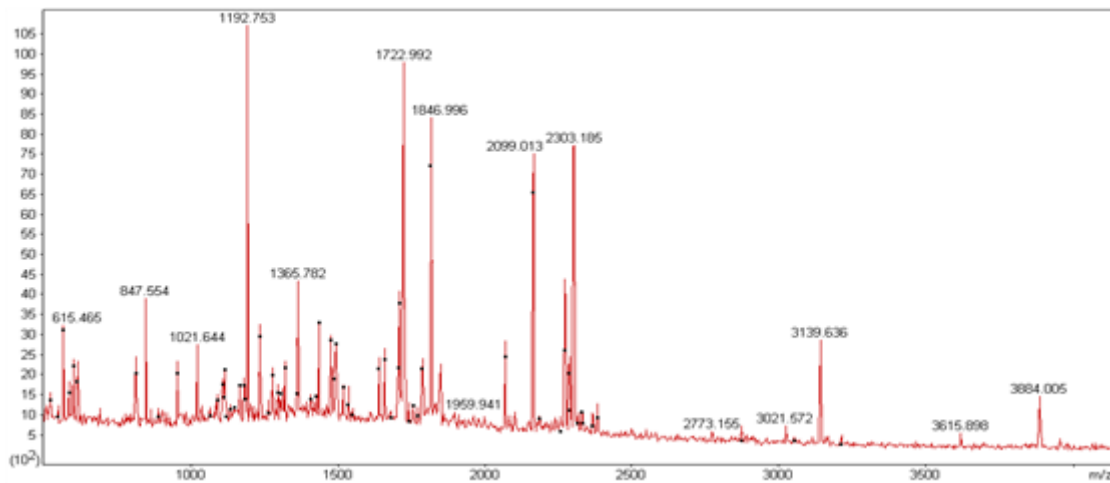

### Probability Based Mowse Score:

Protein score is  $-10 \cdot \log(P)$ , where P is the probability that the observed match is a random event. Protein scores greater than 75 are significant ( $p < 0.05$ ).

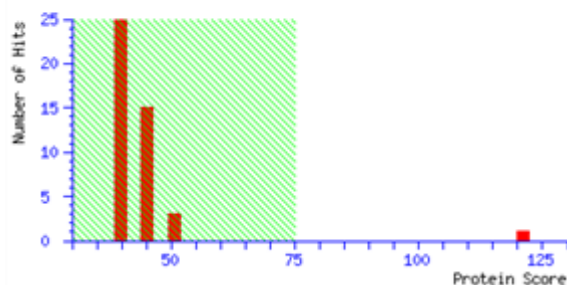



Matched peptide sequences: shown in **Bold Red**

1 **MAPITKETDY** **LVIGGGSGGL** **ASARMASSKF** **GVKATIVENK** **RLGGTCVNVG**  
 51 **CVPKVTYNA** **AALAEAIHDA** **KAYGFSVEQT** **APFDWSSFKT** **KRDYIKRLN**  
 101 **GIYERNLNND** **KVDYLHGWAR** **LVSKNQAEVT** **LDDNSKVLVN** **AKKILVAVGG**  
 151 **KPTIPPEIPG** **AEYGTNSDGF** **FDISTQPKV** **AIVGAGYIAV** **EFAGMFINALG**  
 201 **TETHLFIRYD** **TFLRNFDPMI** **QESVTKAYER** **LGVKLHKRSQ** **ASKVEKDSNG**  
 251 **KLITYKDDQ** **GNESVVSVDV** **NLIWAIGRTP** **ETKDIGLEEA** **GVKLGEKGGHI**  
 301 **LVDEYQNTAV** **DNIYALGDVT** **GEVELTPVAI** **AAGRRLAHL** **FGGPEFANLK**  
 351 **LDYNNVPSV** **FSHPEVGSIG** **LTEPQAIEKY** **GKDNIVYKT** **SFTAMYAMM**  
 401 **EPEQKGPTNY** **KLIVAGPEEK** **VIGLHIMGLG** **SGEMLQGFV** **AVKMGATKAD**  
 451 **FDSCVAIHPT** **SAEELVTLK**

Matched peptides information:

| Start - End | Observed  | Mr (expt) | Mr (calc) | ppm   | M | Peptide                                              |
|-------------|-----------|-----------|-----------|-------|---|------------------------------------------------------|
| 7 - 24      | 1722.9924 | 1721.9851 | 1721.8584 | 73.6  | 0 | K.ETDYLVIIGGGSGGLASAR.M                              |
| 42 - 54     | 1360.7744 | 1359.7671 | 1359.6639 | 75.9  | 0 | R.LGGTCVNVQCVPK.K                                    |
| 55 - 71     | 1786.0142 | 1785.0069 | 1784.9420 | 36.3  | 1 | K.VTYNAALAEAIHDAK.A                                  |
| 56 - 71     | 1657.9265 | 1656.9192 | 1656.8471 | 43.5  | 0 | K.VTYNAALAEAIHDAK.A                                  |
| 72 - 89     | 2067.0447 | 2066.0374 | 2065.9422 | 46.1  | 0 | K.AYGFVSVEQTAPFDWSSFK.T                              |
| 106 - 120   | 1815.0155 | 1814.0082 | 1813.8860 | 67.4  | 1 | R.NLNDRVDYDLHGWAR.L                                  |
| 112 - 120   | 1116.6739 | 1115.6666 | 1115.5512 | 103   | 0 | K.VDYLHGMAR.L                                        |
| 144 - 178   | 3615.8984 | 3614.8911 | 3614.8508 | 11.1  | 0 | K.ILVAVGGKPTIPPEIPGAEYGTNSDGFQFDISTQPK.K             |
| 179 - 208   | 3211.5416 | 3210.5343 | 3210.6900 | -48.5 | 1 | K.KVAIVGAGYIAVEFAGMFINALQETETHLPIR.Y + Oxidation (0) |
| 209 - 214   | 814.5262  | 813.5189  | 813.4021  | 144   | 0 | R.YDTFLR.N                                           |
| 215 - 226   | 1424.7831 | 1423.7758 | 1423.6653 | 77.6  | 0 | R.NFDPMIQESVTK.E + Oxidation (0)                     |
| 252 - 278   | 3021.5723 | 3020.5650 | 3020.5091 | 18.5  | 1 | K.LITYKDDQGNESVVSVDVNLWAIGR.T                        |
| 298 - 334   | 3884.0048 | 3882.9975 | 3882.9640 | 8.64  | 0 | K.GHILVDEYQNTAVDNIYALGDVTGEVELTPVAIAAGR.R            |
| 340 - 350   | 1192.7531 | 1191.7458 | 1191.6288 | 98.2  | 0 | R.LFGGPEFANLK.L                                      |
| 351 - 379   | 3139.6359 | 3138.6286 | 3138.5873 | 13.2  | 0 | K.LDYNNVPSVVSFSHPEVGSIGLTEPQAIEK.Y                   |
| 387 - 405   | 2334.1498 | 2333.1425 | 2333.0418 | 43.2  | 1 | K.VYKTSFTAMYAMMEPEQK.G + Oxidation (0)               |
| 390 - 405   | 1959.9406 | 1958.9333 | 1958.8100 | 63.0  | 0 | K.TSFTAMYAMMEPEQK.G + 2 Oxidation (0)                |
| 412 - 420   | 955.6442  | 954.6369  | 954.5386  | 103   | 0 | K.LIVAGPEEK.V                                        |
| 449 - 469   | 2303.1845 | 2302.1772 | 2302.1151 | 27.0  | 0 | K.ADFDSCVAIHPTSAEELVTLK.-                            |

Spot No.: **21**

Mascot score: **142**

Species: *Fusarium oxysporum f. sp. cubense race 4*

Protein name: **Hsp 70 kda**

NCBI accession No.: **gi| 475663822**      Sequence coverage %: **44**

Matched peptides No.: **23**      Total peptides No.: **70**

Calculated Mr: **70951**      Calculated pI: **5.00**

### Annotated PMF spectra:

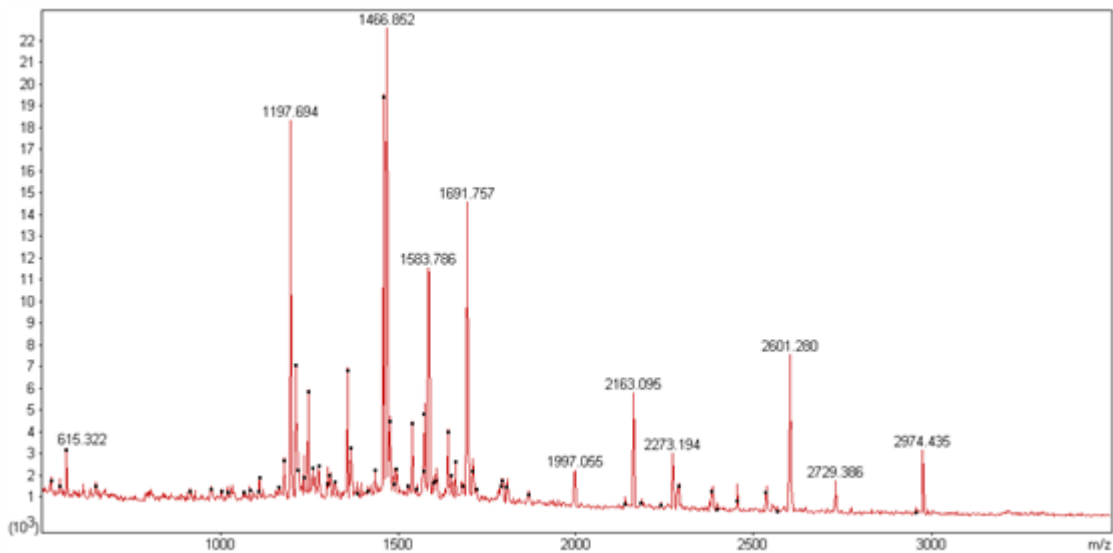

### Probability Based Mowse Score:

Protein score is  $-10 \cdot \log(P)$ , where  $P$  is the probability that the observed match is a random event. Protein scores greater than 75 are significant ( $p < 0.05$ ).

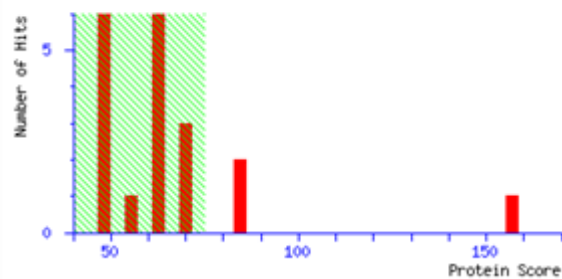

## Matched peptide sequences: shown in **Bold Red**

1 **MAPAVGIDLG** **TTYSCVGIFR** **EDRCIIAND** **QGNRTTPSFV** **GFTDTERLIG**  
 51 **DAAKNQVAMN** **PQNTVFDAGR** **LIGRKFADPE** **VQADMKHFPF** **KIVDKGGKPN**  
 101 **IEVEFKGETK** **TFTPEEISAM** **ILTKMRETAE** **SYLGETVNNA** **VVTVPAYFND**  
 151 **SQRQATKDAG** **LIAGLNVLRI** **INEPTAAAIA** **YGLDKKVEGE** **RNVLIFDLGG**  
 201 **GTFDVSLTI** **EEGIFEVKST** **AGDTHLGGED** **FDNRLVNHFV** **NEFKRKHKKD**  
 251 **LSTNVRALRR** **LRTACERAKR** **TLSSSAQTSI** **EIDSLFEGID** **FYTSITRARF**  
 301 **EELCQDLFRS** **TPVDRVLTDA** **KIDKSLVHEI** **VLVGGSTRIP** **RVQKLITDYF**  
 351 **NGKEPNKSIN** **PDEAVAYGAA** **VQAAILSGDT** **SSKATNEILL** **LDVAPLSLGI**  
 401 **ETAGGMMTKL** **IPRNTTIPTK** **KSEVFSTFSD** **NQPGVLIQVY** **EGERQRTKDN**  
 451 **NLMGKFELTG** **IPPAPRGVPQ** **IEVTFDLNAN** **GIMNVSAVEK** **GTGKSNKIVI**  
 501 **TNDKGRLSKE** **EIERMLNDAE** **KYKEEDEAEG** **KRVAANKGLE** **SYAYSLRNTL**  
 551 **SDPKVEEKIE** **ASDKETLTAE** **IDKVVQWLDD** **NQQATREEYE** **EHQKELEGKA**  
 601 **NPIMMKFYGA** **GGEGAPGGMP** **GGPGGFPGAG** **GPGGAPGAGG** **DDGPTVEEVD**

## Matched peptides information:

| Start - End | Observed  | Mr (expt) | Mr (calc) | ppm   | M | Peptide                           |
|-------------|-----------|-----------|-----------|-------|---|-----------------------------------|
| 2 - 20      | 1997.0549 | 1996.0476 | 1996.0088 | 19.4  | 0 | M.APAVOIDLOTTYSCVGIFR.E           |
| 2 - 23      | 2397.2212 | 2396.2139 | 2396.1795 | 14.4  | 1 | M.APAVOIDLOTTYSCVOIFREDR.C        |
| 24 - 34     | 1275.6350 | 1274.6277 | 1274.5673 | 47.4  | 0 | R.CDIIANDQHR.T                    |
| 35 - 47     | 1457.7042 | 1456.6969 | 1456.6835 | 9.25  | 0 | R.TTSPVVGFTDTER.L                 |
| 96 - 106    | 1217.6469 | 1216.6396 | 1216.6452 | -4.56 | 0 | K.GGRPNIEVEFK.G                   |
| 111 - 124   | 1596.8173 | 1595.8100 | 1595.8116 | -1.02 | 0 | K.TFTPEEISAMILTK.M + Oxidation (M |
| 127 - 153   | 2974.4348 | 2973.4275 | 2973.3992 | 9.53  | 0 | R.ETAESYLGETVNNAVTVPAYFNDSQR.Q    |
| 158 - 169   | 1211.7432 | 1210.7359 | 1210.7034 | 26.9  | 0 | K.DAGLIAGLNVLR.I                  |
| 170 - 185   | 1659.8865 | 1658.8792 | 1658.8879 | -5.23 | 0 | R.IINEPTAAAIAAYLDK.K              |
| 170 - 186   | 1787.9515 | 1786.9442 | 1786.9828 | -21.6 | 1 | R.IINEPTAAAIAAYLDKK.V             |
| 219 - 234   | 1691.7573 | 1690.7500 | 1690.7183 | 18.8  | 0 | K.STAGDTHLOGEDFDNR.L              |
| 235 - 244   | 1246.6771 | 1245.6698 | 1245.6506 | 15.4  | 0 | R.LVRRHPVNEFK.R                   |
| 298 - 309   | 1583.7856 | 1582.7783 | 1582.7562 | 14.0  | 1 | R.ARFELCQDLFR.S                   |
| 300 - 309   | 1356.6598 | 1355.6525 | 1355.6180 | 25.5  | 0 | R.FEELCQDLFR.S                    |
| 325 - 338   | 1466.8520 | 1465.8447 | 1465.8253 | 13.3  | 0 | K.SLVHEIVLVGGSTR.I                |
| 358 - 383   | 2535.3093 | 2534.3020 | 2534.2500 | 20.5  | 0 | K.SINPDEAVAYGAAVQAAILSGDTSSK.A    |
| 421 - 444   | 2729.3865 | 2728.3792 | 2728.3344 | 16.4  | 1 | K.KSEVFSTFSDNQPGVLIQVYEGER.Q      |
| 422 - 444   | 2601.2798 | 2600.2725 | 2600.2395 | 12.7  | 0 | K.SEVFSTFSDNQPGVLIQVYEGER.Q       |
| 447 - 455   | 1020.5355 | 1019.5282 | 1019.5070 | 20.9  | 1 | R.TKDNLMGK.F                      |
| 456 - 466   | 1197.6939 | 1196.6866 | 1196.6553 | 26.1  | 0 | K.FELTOIPPAPR.G                   |
| 507 - 514   | 1003.4869 | 1002.4796 | 1002.5345 | -54.8 | 1 | R.LSKEIER.M                       |
| 574 - 586   | 1572.7760 | 1571.7687 | 1571.7692 | -0.32 | 0 | K.VVQWLDDNQQATR.E                 |
| 587 - 599   | 1647.7699 | 1646.7626 | 1646.7423 | 12.3  | 1 | R.EYEEHQKELEGK.A                  |

Spot No.: **22**

Mascot score: **129**

Species: *Fusarium oxysporum f. sp. cubense race 4*

Protein name: **Enolase**

NCBI accession No.: **gi| 475668982**      Sequence coverage %: **57**

Matched peptides No.: **22**      Total peptides No.: **77**

Calculated Mr: **47469**      Calculated pI: **5.06**

### Annotated PMF spectra:

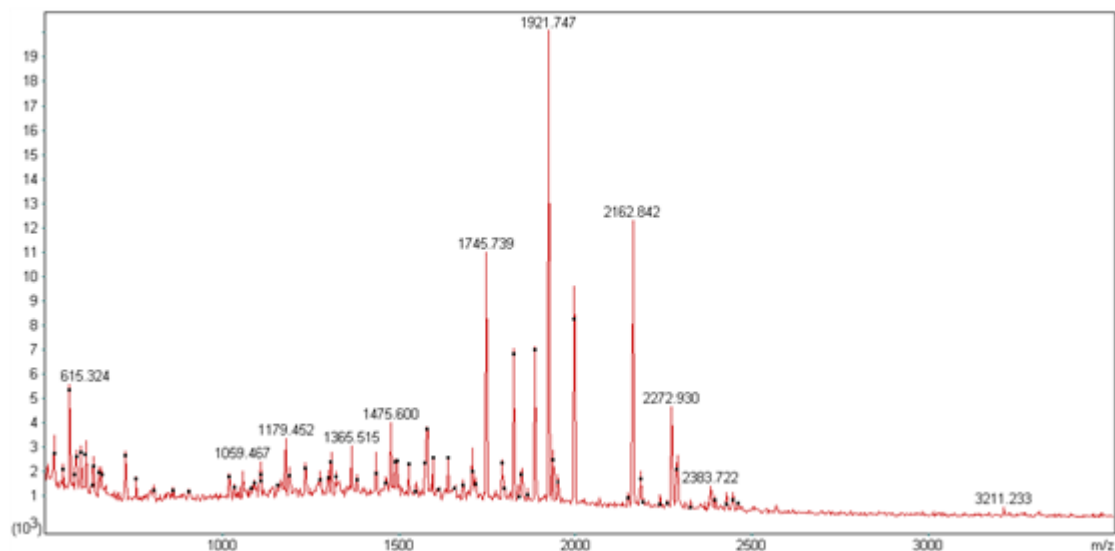

### Probability Based Mowse Score:

Protein score is  $-10 \cdot \log(P)$ , where P is the probability that the observed match is a random event. Protein scores greater than 75 are significant ( $p < 0.05$ ).

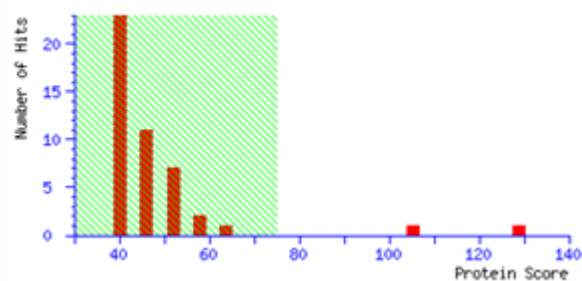

## Matched peptide sequences: shown in **Bold Red**

1 MAVKKVFARS **VYDSRGNPTV** EVDVVTETGL HRAIVPSGAS TGQHEACELR  
 51 DGDKSKWGGK **GVTKAVENVN** TVIAPALIEK NLDVKDQSAV DAFLNELDGT  
 101 **PNKTKL**GANAL **ILGVSLAVAK** **AGAAEKGVPL** YAHVSDLAGT **KKPYVLPVFP**  
 151 **MNVLNGGSHA** **GGRLAFQEFM** **IVPTEAPTFT** EAMRQGAEVY **QALKGLAKKR**  
 201 YGQSAGNVGD EGGVAPDIQT AEEALELITD AIEQVGYTGK IKIAMDVASS  
 251 **EFYKVEEKY** DLDFKNPESD PIKWITYEEL ANALYSELCKK YPIVSIEDPF  
 301 AEDDWEAWSY **FSKTQDIQIV** **GDDLTVTNPL** RIKKAIELKS CNALLLKVNQ  
 351 **IGTLTESIQA** **AKDSYADGWG** **VMVSHRSGET** EDVTIADIAV **GLRAGEIKTG**  
 401 APARSERLAK **LNQILRIEEE** **LGDQAIYPGA** NFRKSVNL

## Matched peptides information:

| Start - End | Observed  | Mr (expt) | Mr (calc) | ppm   | M | Peptide                                     |
|-------------|-----------|-----------|-----------|-------|---|---------------------------------------------|
| 10 - 15     | 726.3128  | 725.3055  | 725.3344  | -39.9 | 0 | R.SVYDSR.G                                  |
| 16 - 32     | 1822.7604 | 1821.7531 | 1821.9221 | -92.8 | 0 | R.GNPTVEVDVVTETGLH.R.A                      |
| 33 - 50     | 1882.7346 | 1881.7273 | 1881.9003 | -91.9 | 0 | R.AIVPSGASTQHEACELR.D                       |
| 65 - 80     | 1680.7465 | 1679.7392 | 1679.9458 | -123  | 0 | K.AVENVNTVIAPALIEK.N                        |
| 86 - 103    | 1933.7213 | 1932.7140 | 1932.9065 | -99.6 | 0 | K.DQSAVDVAFNELDOTPNK.T                      |
| 86 - 105    | 2162.8417 | 2161.8344 | 2162.0491 | -99.3 | 1 | K.DQSAVDVAFNELDOTPNKTK.L                    |
| 127 - 141   | 1527.6143 | 1526.6070 | 1526.8093 | -132  | 0 | K.GVPLYAIVSDLAOTE.K                         |
| 142 - 163   | 2326.8202 | 2325.8129 | 2325.2052 | 261   | 0 | K.KPYVLPVFPFQVNLNQGSHAGGR.L + Oxidation (0) |
| 164 - 184   | 2428.8829 | 2427.8756 | 2428.1807 | -126  | 0 | R.LAFQEFMIVPTEAPTFTAMR.Q                    |
| 164 - 184   | 2444.9157 | 2443.9084 | 2444.1756 | -109  | 0 | R.LAFQEFMIVPTEAPTFTAMR.Q + Oxidation (0)    |
| 164 - 184   | 2460.8860 | 2459.8787 | 2460.1705 | -119  | 0 | R.LAFQEFMIVPTEAPTFTAMR.Q + 2 Oxidation (0)  |
| 185 - 198   | 1475.5997 | 1474.5924 | 1474.8143 | -150  | 1 | R.QQAEVYQALRGLAK.K                          |
| 243 - 258   | 1845.6991 | 1844.6918 | 1844.8966 | -106  | 1 | K.IAMDVASSEFYKVEEK.K                        |
| 243 - 258   | 1861.6670 | 1860.6597 | 1860.8815 | -119  | 1 | K.IAMDVASSEFYKVEEK.K + Oxidation (0)        |
| 314 - 331   | 1997.8631 | 1996.8558 | 1997.0430 | -93.7 | 0 | K.TQDIQIVODDLTVTNPLR.I                      |
| 314 - 333   | 2238.8872 | 2237.8799 | 2238.2220 | -153  | 1 | K.TQDIQIVODDLTVTNPLRIK.K                    |
| 348 - 362   | 1572.6496 | 1571.6423 | 1571.8519 | -133  | 0 | K.VNQTGTLTESIQA.K.D                         |
| 363 - 376   | 1579.5457 | 1578.5384 | 1578.6885 | -95.1 | 0 | K.DSYADGWVVMVSHR.S                          |
| 363 - 376   | 1595.5153 | 1594.5080 | 1594.6835 | -110  | 0 | K.DSYADGWVVMVSHR.S + Oxidation (0)          |
| 377 - 393   | 1745.7390 | 1744.7317 | 1744.8843 | -87.4 | 0 | R.SGETEDVTIADIAVGLR.A                       |
| 411 - 416   | 756.3762  | 755.3689  | 755.4653  | -128  | 0 | K.LNQILR.I                                  |
| 417 - 433   | 1921.7475 | 1920.7402 | 1920.9217 | -94.5 | 0 | R.IEELGDQAIYPGANFR.K                        |

Spot No.: **23**

NCBI accession No.: **gi|342882947**

Plant species: ***Fusarium oxysporum Fo5176***

Protein name: **vacuolar protease A**

Mascot score: **218**

Sequence coverage %: **10**

The number of matched peptides with  $p \leq 0.05$ : **6**

Calculated Mr: **42978**

Calculated pI: **6.66**

### Annotated MS spectra:

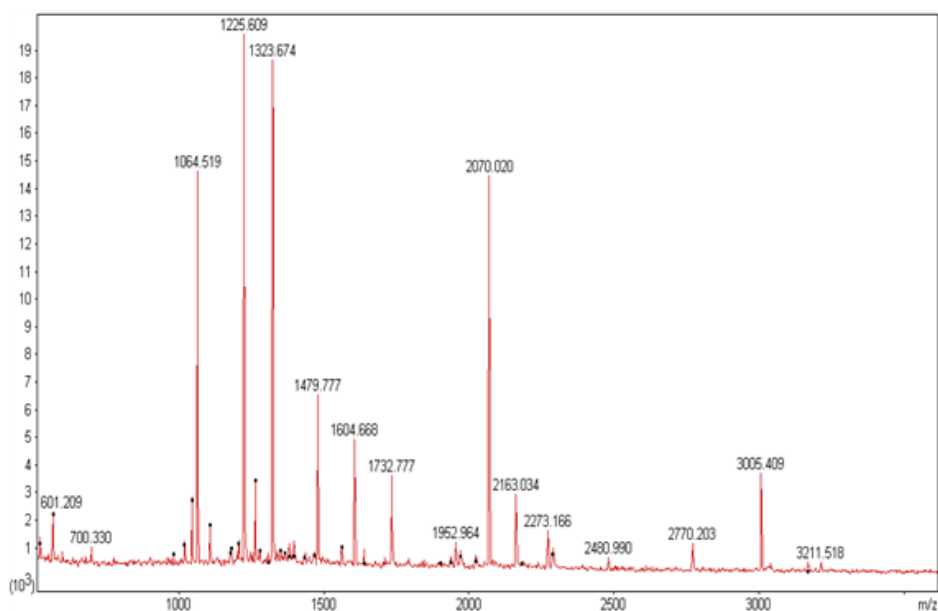

### Probability Based Mowse Score:

#### Mascot Score Histogram

Ions score is  $-10 \cdot \log(P)$ , where  $P$  is the probability that the observed match is a random event. Individual ions scores  $> 48$  indicate identity or extensive homology ( $p < 0.05$ ). Protein scores are derived from ions scores as a non-probabilistic basis for ranking protein hits.

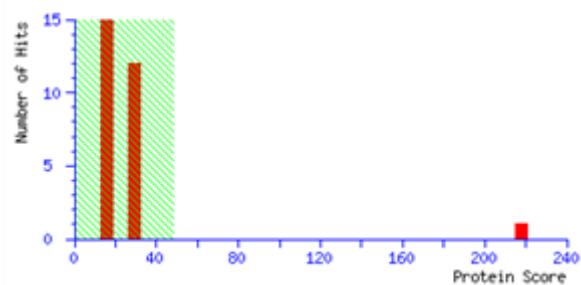

Matched peptide sequences: shown in **Bold Red**

```

1  MKGALLTAAA  LLGSAQAGVH  KMKLNKVPLA  DQLATNSVED  HLQSLGQKYL
51  GASRPKNAAD  YAFATNTVNV  EGGHPVPVSN  FMNAQYFSEI  TIGTPPQSFK
101 VVLDTGSSNL  WVPSQQCGSI  ACYLHSHYDS  SASSTYKENG  TEFEIHYGSG
151 SLSGFVSNLV  VSIQDLEIKD  QDFAEATKEP  GLAFAFGREF  GILGLGYDRI
201 AVNGMVPPFY  QMVNQKLLDE  PVFAFYLDLQ  EGESEATFGG  IDKSKFTGDI
251 EYIPLRRKAY  WEVDLEAIAF  GDEVAEQENT  GAILDTGTSL  NVLPSALAEI
301 LNKEIGAKKG  YNGQYTIED  KRASLPDITF  NLAGSNYSLP  ATDYILEVQG
351 SCISTFQGM  FPEVGPLVI  LGDAFLRRY  SVYDLGKNAV  GLARAK

```

### Matched peptides information:

| Query              | Start - End | Observed  | Mr(expt)  | Mr(only)  | ppm   | H | Score | Expect  | Rank              | U | Peptide                |
|--------------------|-------------|-----------|-----------|-----------|-------|---|-------|---------|-------------------|---|------------------------|
| <a href="#">#1</a> | 170 - 188   | 2070.0200 | 2069.0127 | 2068.9854 | 13.2  | 1 | 108   | 4.3e-09 | <a href="#">1</a> | U | K.DQDFARATKPOLAFAPGR.F |
| <a href="#">#6</a> | 170 - 188   | 2070.0200 | 2069.0127 | 2068.9854 | 13.2  | 1 | 108   | 4.3e-09 | <a href="#">1</a> | U | K.DQDFARATKPOLAFAPGR.F |
| <a href="#">#1</a> | 189 - 199   | 1225.6090 | 1224.6017 | 1224.6139 | -9.94 | 0 | 48    | 0.057   | <a href="#">1</a> | U | R.FDGILOYDR.I          |
| <a href="#">#2</a> | 189 - 199   | 1225.6090 | 1224.6017 | 1224.6139 | -9.94 | 0 | 48    | 0.057   | <a href="#">1</a> | U | R.FDGILOYDR.I          |
| <a href="#">#2</a> | 246 - 256   | 1323.6740 | 1322.6667 | 1322.6870 | -15.4 | 0 | 62    | 0.0022  | <a href="#">1</a> | U | K.PYDIEYIPLR.R         |
| <a href="#">#1</a> | 246 - 256   | 1323.6740 | 1322.6667 | 1322.6870 | -15.4 | 0 | 62    | 0.0022  | <a href="#">1</a> | U | K.PYDIEYIPLR.R         |

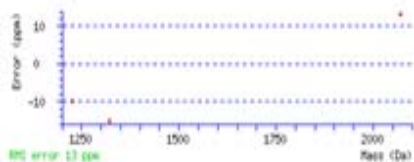

# Annotated ion spectra of the matched peptides with $p \leq 0.05$ :

CID No.: **23-1225.6**

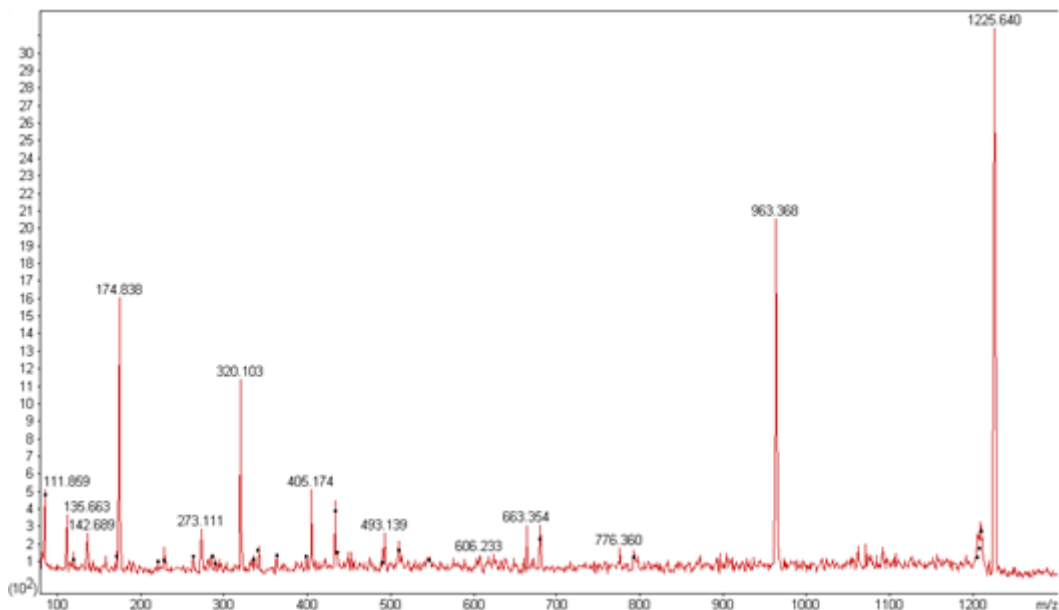

MS/MS Fragmentation of **R.FDGILGLGYDRI**

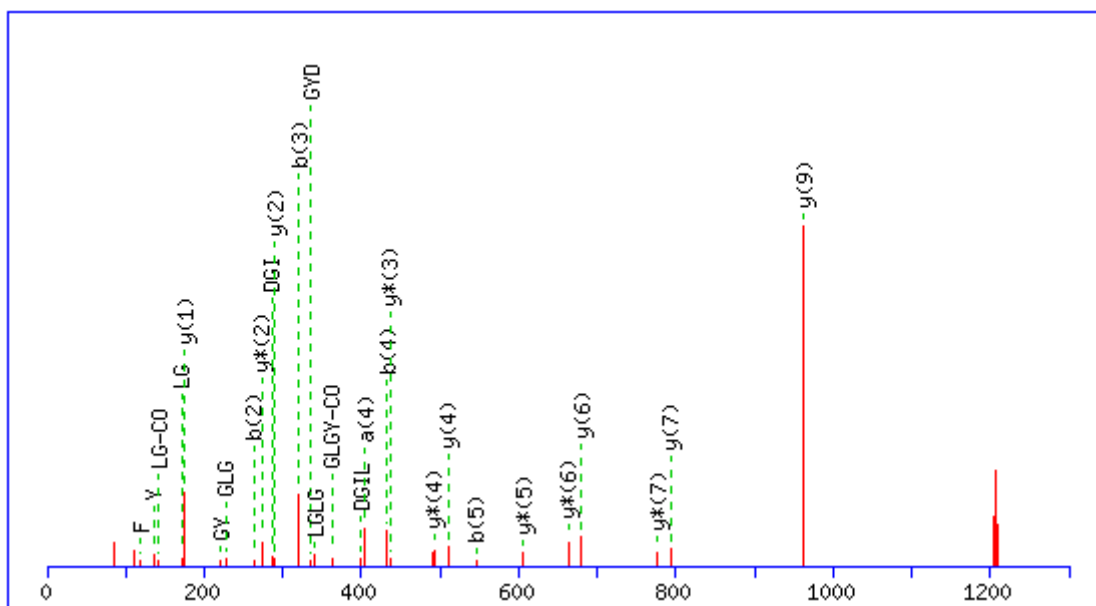

Monoisotopic mass of neutral peptide  $M_r(\text{calc})$ : 1224.6139

| #  | Immon.   | a         | a <sup>0</sup> | b         | b <sup>0</sup> | d        | d'       | Seq. | v         | w         | w'       | y         | y*        | y <sup>0</sup> | #  |
|----|----------|-----------|----------------|-----------|----------------|----------|----------|------|-----------|-----------|----------|-----------|-----------|----------------|----|
| 1  | 120.0808 | 120.0808  |                | 148.0757  |                | 44.0495  |          | F    |           |           |          |           |           |                | 11 |
| 2  | 88.0393  | 235.1077  | 217.0972       | 263.1026  | 245.0921       | 191.1179 |          | D    | 1018.5316 | 1017.5364 |          | 1078.5528 | 1061.5262 | 1060.5422      | 10 |
| 3  | 30.0338  | 292.1292  | 274.1186       | 320.1241  | 302.1135       |          |          | G    |           |           |          | 963.5258  | 946.4993  | 945.5152       | 9  |
| 4  | 86.0964  | 405.2132  | 387.2027       | 433.2082  | 415.1976       | 377.1819 | 391.1976 | I    | 848.4261  | 861.4465  | 875.4621 | 906.5043  | 889.4778  | 888.4938       | 8  |
| 5  | 86.0964  | 518.2973  | 500.2867       | 546.2922  | 528.2817       | 476.2504 |          | L    | 735.3420  | 734.3468  |          | 793.4203  | 776.3937  | 775.4097       | 7  |
| 6  | 30.0338  | 575.3188  | 557.3082       | 603.3137  | 585.3031       |          |          | G    |           |           |          | 680.3362  | 663.3097  | 662.3257       | 6  |
| 7  | 86.0964  | 688.4028  | 670.3923       | 716.3978  | 698.3872       | 646.3559 |          | L    | 565.2365  | 564.2413  |          | 623.3148  | 606.2882  | 605.3042       | 5  |
| 8  | 30.0338  | 745.4243  | 727.4137       | 773.4192  | 755.4087       |          |          | G    |           |           |          | 510.2307  | 493.2041  | 492.2201       | 4  |
| 9  | 136.0757 | 908.4876  | 890.4771       | 936.4825  | 918.4720       |          |          | Y    | 345.1517  |           |          | 453.2092  | 436.1827  | 435.1987       | 3  |
| 10 | 88.0393  | 1023.5146 | 1005.5040      | 1051.5095 | 1033.4989      | 979.5247 |          | D    | 230.1248  | 229.1295  |          | 290.1459  | 273.1193  | 272.1353       | 2  |
| 11 | 129.1135 |           |                |           |                |          |          | R    | 74.0237   | 73.0284   |          | 175.1190  | 158.0924  |                | 1  |



| Seq           | ya              | yb              | Seq           | ya              | yb              | Seq            | ya              | yb              |
|---------------|-----------------|-----------------|---------------|-----------------|-----------------|----------------|-----------------|-----------------|
| <b>DG</b>     | 145.0608        | 173.0557        | <b>DGI</b>    | 258.1448        | <b>286.1397</b> | <b>DGIL</b>    | 371.2289        | <b>399.2238</b> |
| <b>DGILG</b>  | 428.2504        | 456.2453        | <b>DGILGL</b> | 541.3344        | 569.3293        | <b>DGILGLG</b> | 598.3559        | 626.3508        |
| <b>GI</b>     | <b>143.1179</b> | <b>171.1128</b> | <b>GIL</b>    | 256.2020        | 284.1969        | <b>GILG</b>    | 313.2234        | <b>341.2183</b> |
| <b>GILGL</b>  | 426.3075        | 454.3024        | <b>GILGLG</b> | 483.3289        | 511.3239        | <b>GILGLGY</b> | 646.3923        | 674.3872        |
| <b>IL</b>     | 199.1805        | 227.1754        | <b>ILG</b>    | 256.2020        | 284.1969        | <b>ILGL</b>    | 369.2860        | 397.2809        |
| <b>ILGLG</b>  | 426.3075        | 454.3024        | <b>ILGLGY</b> | 589.3708        | 617.3657        | <b>LG</b>      | <b>143.1179</b> | <b>171.1128</b> |
| <b>LGL</b>    | 256.2020        | 284.1969        | <b>LGLG</b>   | 313.2234        | <b>341.2183</b> | <b>LGLGY</b>   | 476.2867        | 504.2817        |
| <b>LGLGYD</b> | 591.3137        | 619.3086        | <b>GL</b>     | <b>143.1179</b> | <b>171.1128</b> | <b>GLG</b>     | 200.1394        | <b>228.1343</b> |
| <b>GLGY</b>   | <b>363.2027</b> | 391.1976        | <b>GLGYD</b>  | 478.2296        | 506.2245        | <b>LG</b>      | <b>143.1179</b> | <b>171.1128</b> |
| <b>LGY</b>    | 306.1812        | 334.1761        | <b>LGYD</b>   | 421.2082        | 449.2031        | <b>GY</b>      | 193.0972        | <b>221.0921</b> |
| <b>GYD</b>    | 308.1241        | <b>336.1190</b> | <b>YD</b>     | 251.1026        | 279.0975        |                |                 |                 |

## Annotated ion spectra of the matched peptides with $p \leq 0.05$ :

CID No.: [23-1323.67](#)

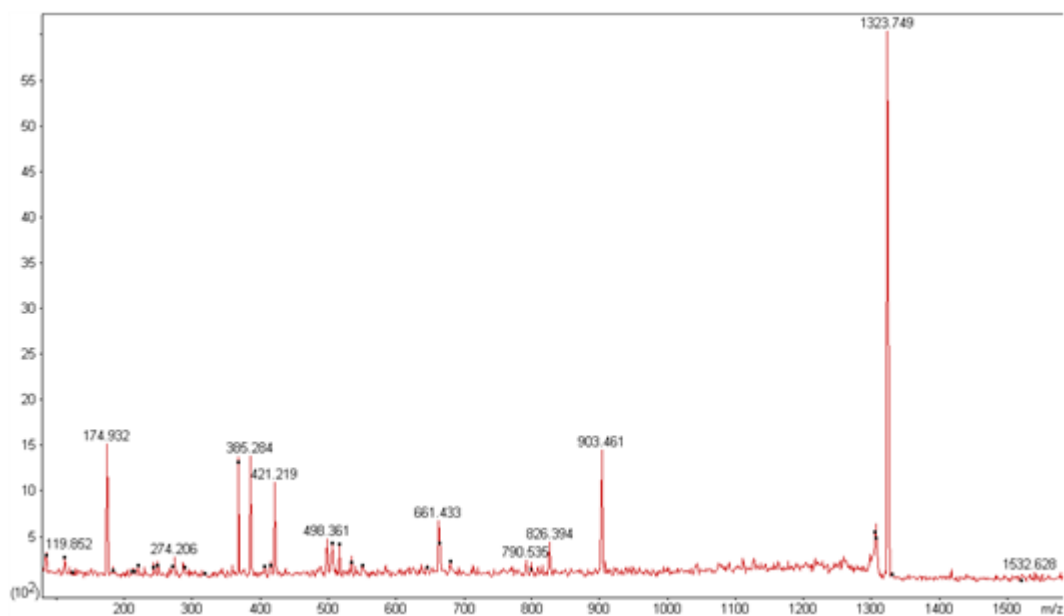

MS/MS Fragmentation of **K.FTGDIEYIPLR.R**

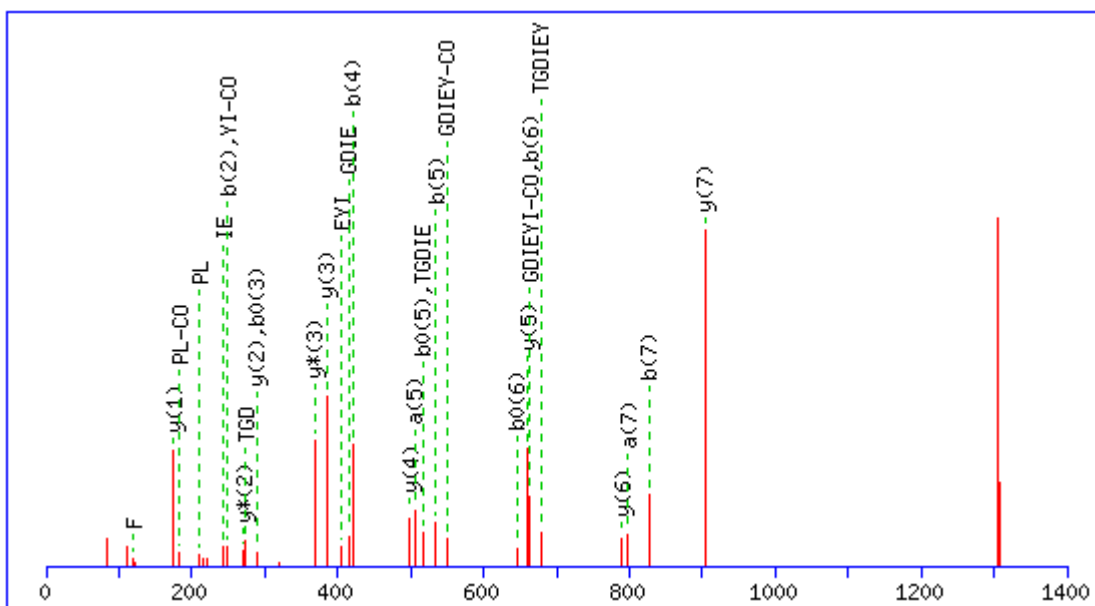

Monoisotopic mass of neutral peptide  $M_r(\text{calc})$ : 1322.6870

| #  | Immon.   | a         | a <sup>0</sup> | b         | b <sup>0</sup> | d         | d'       | Seq. | v         | w         | w'        | y         | y*        | y <sup>0</sup> | #  |
|----|----------|-----------|----------------|-----------|----------------|-----------|----------|------|-----------|-----------|-----------|-----------|-----------|----------------|----|
| 1  | 120.0808 | 120.0808  |                | 148.0757  |                | 44.0495   |          | F    |           |           |           |           |           |                | 11 |
| 2  | 74.0600  | 221.1285  | 203.1179       | 249.1234  | 231.1128       | 205.1335  | 207.1128 | T    | 1130.5841 | 1143.6045 | 1145.5837 | 1176.6259 | 1159.5994 | 1158.6154      | 10 |
| 3  | 30.0338  | 278.1499  | 260.1394       | 306.1448  | 288.1343       |           |          | G    |           |           |           | 1075.5782 | 1058.5517 | 1057.5677      | 9  |
| 4  | 88.0393  | 393.1769  | 375.1663       | 421.1718  | 403.1612       | 349.1870  |          | D    | 958.5356  | 957.5404  |           | 1018.5568 | 1001.5302 | 1000.5462      | 8  |
| 5  | 86.0964  | 506.2609  | 488.2504       | 534.2558  | 516.2453       | 478.2296  | 492.2453 | I    | 845.4516  | 858.4720  | 872.4876  | 903.5298  | 886.5033  | 885.5193       | 7  |
| 6  | 102.0550 | 635.3035  | 617.2930       | 663.2984  | 645.2879       | 577.2980  |          | E    | 716.4090  | 715.4137  |           | 790.4458  | 773.4192  | 772.4352       | 6  |
| 7  | 136.0757 | 798.3668  | 780.3563       | 826.3618  | 808.3512       |           |          | Y    | 553.3457  |           |           | 661.4032  | 644.3766  |                | 5  |
| 8  | 86.0964  | 911.4509  | 893.4403       | 939.4458  | 921.4353       | 883.4196  | 897.4353 | I    | 440.2616  | 453.2820  | 467.2976  | 498.3398  | 481.3133  |                | 4  |
| 9  | 70.0651  | 1008.5037 | 990.4931       | 1036.4986 | 1018.4880      | 982.4880  |          | P    | 343.2088  | 342.2136  |           | 385.2558  | 368.2292  |                | 3  |
| 10 | 86.0964  | 1121.5877 | 1103.5772      | 1149.5827 | 1131.5721      | 1079.5408 |          | L    | 230.1248  | 229.1295  |           | 288.2030  | 271.1765  |                | 2  |
| 11 | 129.1135 |           |                |           |                |           |          | R    | 74.0237   | 73.0284   |           | 175.1190  | 158.0924  |                | 1  |

| Seq    | ya       | yb       | Seq    | ya       | yb       | Seq   | ya       | yb       |
|--------|----------|----------|--------|----------|----------|-------|----------|----------|
| TG     | 131.0815 | 159.0764 | TGD    | 246.1084 | 274.1034 | TGDI  | 359.1925 | 387.1874 |
| TGDIE  | 488.2351 | 516.2300 | TGDIEY | 651.2984 | 679.2933 | GD    | 145.0608 | 173.0557 |
| GDI    | 258.1448 | 286.1397 | GDIE   | 387.1874 | 415.1823 | GDIEY | 550.2508 | 578.2457 |
| GDIEYI | 663.3348 | 691.3297 | DI     | 201.1234 | 229.1183 | DIE   | 330.1660 | 358.1609 |
| DIEY   | 493.2293 | 521.2242 | DIEYI  | 606.3134 | 634.3083 | IE    | 215.1390 | 243.1339 |
| IEY    | 378.2023 | 406.1973 | IEYI   | 491.2864 | 519.2813 | IEYIP | 588.3392 | 616.3341 |
| EY     | 265.1183 | 293.1132 | EYI    | 378.2023 | 406.1973 | EYIP  | 475.2551 | 503.2500 |
| EYIPL  | 588.3392 | 616.3341 | YI     | 249.1598 | 277.1547 | YIP   | 346.2125 | 374.2074 |
| YIPL   | 459.2966 | 487.2915 | IP     | 183.1492 | 211.1441 | IPL   | 296.2333 | 324.2282 |
| PL     | 183.1492 | 211.1441 |        |          |          |       |          |          |

## Annotated ion spectra of the matched peptides with $p \leq 0.05$ :

CID No.: [23-2070.02](#)

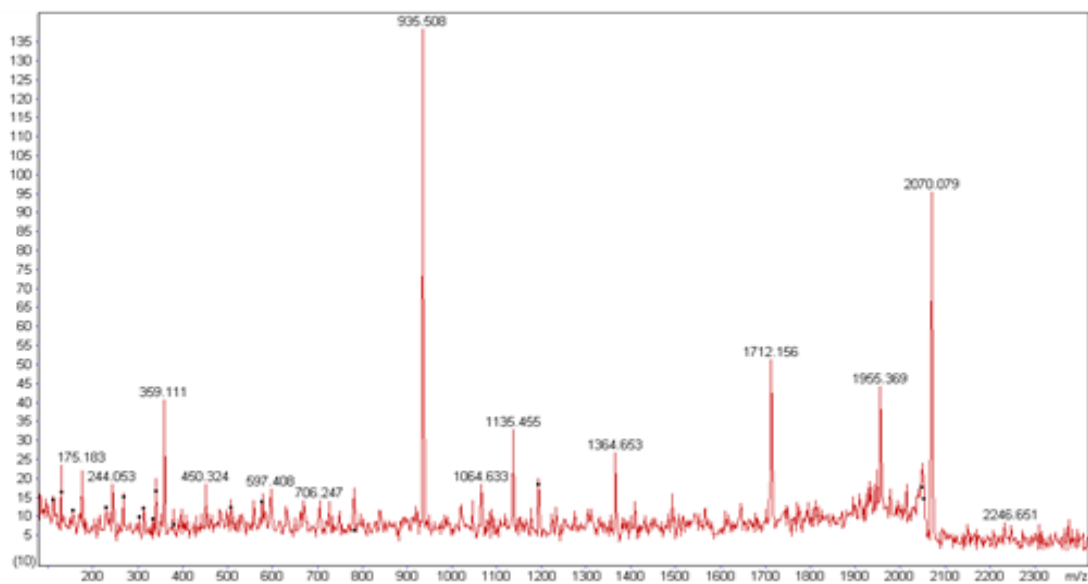

MS/MS Fragmentation of **K.DQDFAEATKEPGLAFAFGR.F**

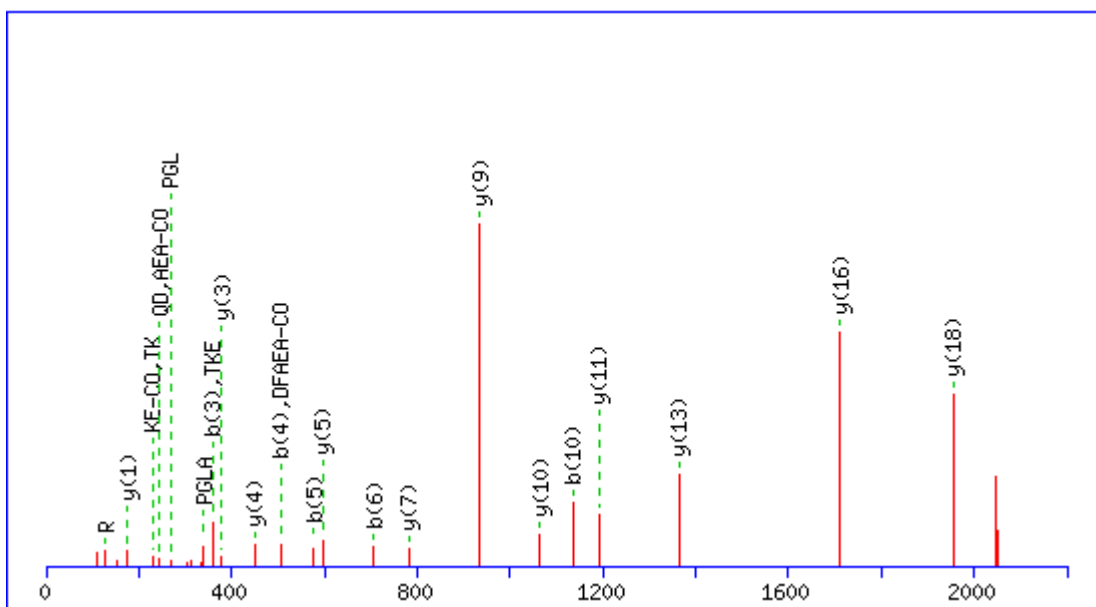

Monoisotopic mass of neutral peptide  $M_r(\text{calc})$ : 2068.9854



Spot No.: **24**

Mascot score: **95**

Species: *Fusarium oxysporum Fo5176*

Protein name: **vacuolar protease A**

NCBI accession No.: **gi| 342882947**      Sequence coverage %: **21**

Matched peptides No.: **9**      Total peptides No.: **39**

Calculated Mr: **42978**      Calculated pI: **4.66**

### Annotated PMF spectra:

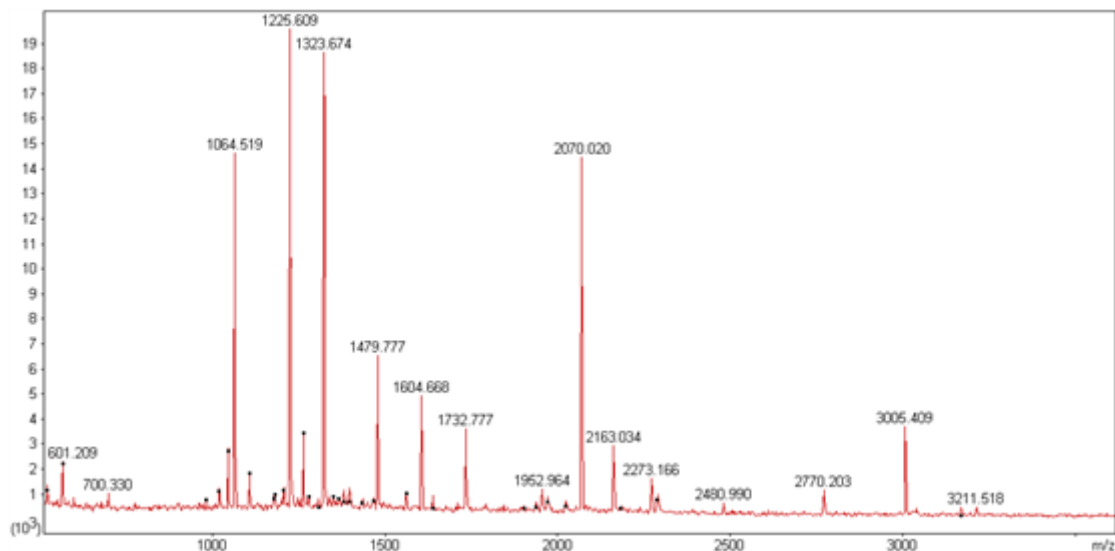

### Probability Based Mowse Score:

Protein score is  $-10 \cdot \log(P)$ , where P is the probability that the observed match is a random event. Protein scores greater than 75 are significant ( $p < 0.05$ ).

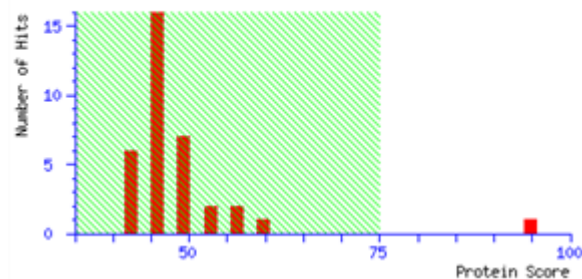

Matched peptide sequences: shown in **Bold Red**

```

1  MKGALLTAAA  LLGSAQAGVH  KMKLNKVPLA  DQLATNSVED  HLQSLGQKYL
51  GASRPKNAAD  YAFATNTVNV  EGGHPVPVSN  FMNAQYFSEI  TIGTPPQSFK
101 VVLDTGSSNL  WVPSQQCGSI  ACYLHISKYDS  SASSTYKENG  TEFEIHYGSG
151 SLSGFVSNDV  VSIGDLEIKD  QDFAEATKEP  GLAFAFGRFD  GILGLGYDRI
201 AVNGMVPPFY  QMVNQKLLDE  VFVAFYLDLDDQ  EGESEATFGG  IDKSKFTGDI
251 EYIPLRRKAY  WEVDLEAIAF  GDEVAEQENT  GAILDTGTSL  NVLPSALAEI
301 LNKEIGAKKG  YNGQYTIIEC  KRASLPDITF  NLAGSNYSLP  ATDYILEVQG
351 SCISTFQGM  FPEPVGPLVI  LGDAFLRRY  SVYDLGKNAV  GLARAK

```

Matched peptides information:

| Start | End | Observed  | Mr (expt) | Mr (calc) | ppm   | M | Peptide                                  |
|-------|-----|-----------|-----------|-----------|-------|---|------------------------------------------|
| 170   | 188 | 2070.0204 | 2069.0131 | 2068.9854 | 13.4  | 1 | <b>K.DQDFAEATKEPGLAFAPGR.F</b>           |
| 179   | 188 | 1064.5189 | 1063.5116 | 1063.5451 | -31.5 | 0 | <b>K.EPGLAFAPGR.F</b>                    |
| 189   | 199 | 1225.6092 | 1224.6019 | 1224.6139 | -9.77 | 0 | <b>R.FDGILGLGYDR.I</b>                   |
| 217   | 243 | 3005.4088 | 3004.4015 | 3004.3866 | 4.97  | 0 | <b>K.LLDEPVVAFYLDLDDQEGESEATFGGIDK.S</b> |
| 246   | 256 | 1323.6737 | 1322.6664 | 1322.6870 | -15.6 | 0 | <b>K.FTGDIEYIPLR.R</b>                   |
| 246   | 257 | 1479.7771 | 1478.7698 | 1478.7881 | -12.4 | 1 | <b>K.FTGDIEYIPLRR.K</b>                  |
| 378   | 387 | 1263.6303 | 1262.6230 | 1262.6295 | -5.14 | 1 | <b>R.RYYSVYDLGK.N</b>                    |
| 379   | 387 | 1107.4779 | 1106.4706 | 1106.5284 | -52.2 | 0 | <b>R.YYSVYDLGK.N</b>                     |
| 388   | 394 | 700.3298  | 699.3225  | 699.4028  | -115  | 0 | <b>K.NAVGLAR.A</b>                       |

Spot No.: **25**

Mascot score: **137**

Species: ***Fusarium oxysporum Fo5176***

Protein name: **NADP-dependent glycerol dehydrogenase**

NCBI accession No.: **gi| 342888721**      Sequence coverage %: **59**

Matched peptides No.: **20**      Total peptides No.: **75**

Calculated Mr: **37413**      Calculated pI: **5.91**

### Annotated PMF spectra:

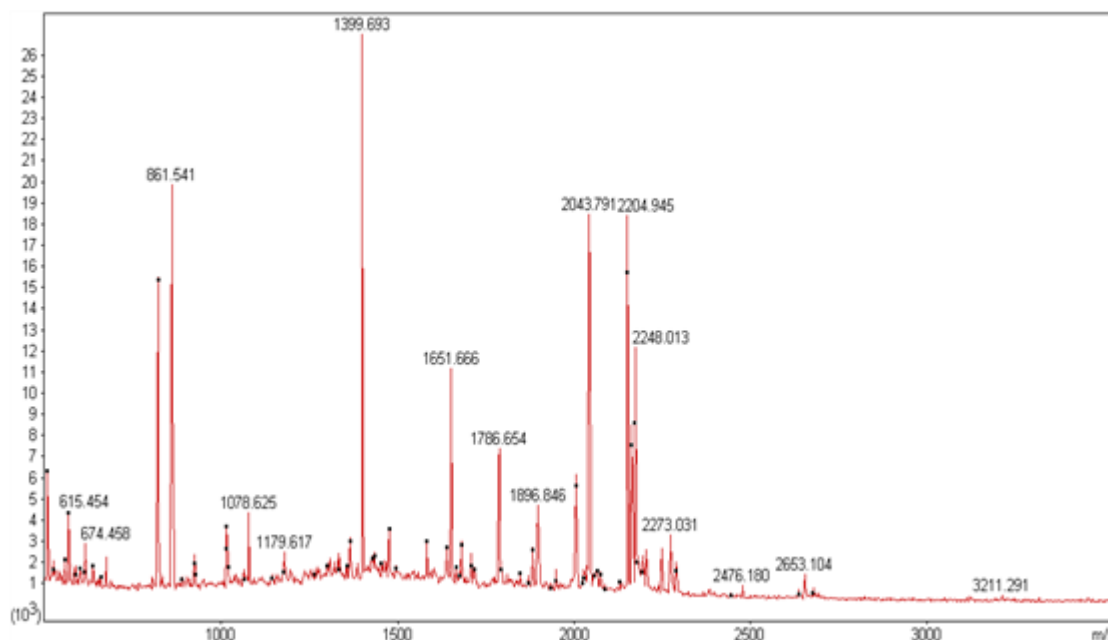

### Probability Based Mowse Score:

Protein score is  $-10 \cdot \log(P)$ , where P is the probability that the observed match is a random event. Protein scores greater than 75 are significant ( $p < 0.05$ ).

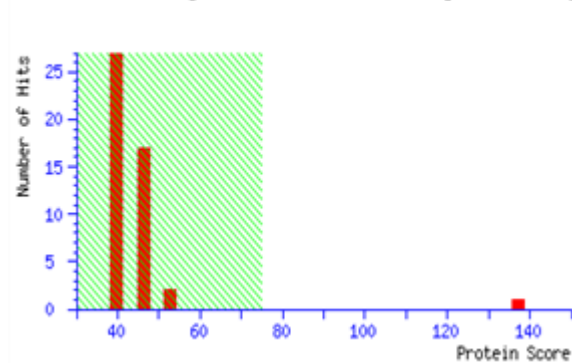



## Matched peptide sequences: shown in **Bold Red**

1 **MSFG**RTVTLN SGHKMPQIGY GTWQAAPGEV GNGVYEALKA GYRHLDLAKI  
 51 **YQNQR**EVGEG IKKALNDVPG **LKREDIFITG** KLWNNKHRPE EVPGALDDSL  
 101 EELGLDYLDL WLIHWVFAFK **NGPELFP**LKA DDKN**KTELDQ** GVTLSQ**TWEA**  
 151 **VTKLP**KEKVR **SIGVSNFSIE** MLE**TI**IKDTG VTPAIN**QVER** HPR**L**Q**PELV**  
 201 **KYQKE**KGIYL TAYS**AFG**NNS WGE**PL**LINTP EV**K**AIAERLS KSKG**KEV**TPA  
 251 **QVILAW**STLD NHIVIPK**SVT** PARIR**S**N**FEE** VELDE**EAIKE** LE**K**F**G**KE**PQR**  
 301 FNIP**K**TY**SPD** **WDIDV**FGDEK E**K**TATHKVVL KL

## Matched peptides information:

| Start - End | Observed  | Mr(expt)  | Mr(calc)  | ppm   | M | Peptide                                                                                 |
|-------------|-----------|-----------|-----------|-------|---|-----------------------------------------------------------------------------------------|
| 1 - 5       | 613.4533  | 612.4460  | 612.2690  | 289   | 0 | - .MSFGR.T + Oxidation (0)                                                              |
| 50 - 55     | 821.5249  | 820.5177  | 820.4191  | 120   | 0 | K.IYQNR.E                                                                               |
| 64 - 72     | 926.5623  | 925.5551  | 925.5233  | 34.3  | 0 | K.ALNDV <b>FOLK</b> .R                                                                  |
| 73 - 81     | 1078.6246 | 1077.6173 | 1077.5818 | 32.9  | 1 | K.RE <b>DIFITG</b> .L                                                                   |
| 82 - 86     | 674.4577  | 673.4504  | 673.3547  | 142   | 0 | K.L <b>WNNK</b> .H                                                                      |
| 121 - 129   | 1014.5672 | 1013.5599 | 1013.5546 | 5.29  | 0 | K.N <b>GPELFP</b> LK.A                                                                  |
| 134 - 153   | 2248.0129 | 2247.0056 | 2247.1383 | -59.0 | 1 | K.N <b>KTELDQ</b> GV <b>TLSQ</b> T <b>WEAVT</b> K.L                                     |
| 136 - 153   | 2005.8525 | 2004.8452 | 2005.0004 | -77.4 | 0 | K.T <b>ELDQ</b> GV <b>TLSQ</b> T <b>WEAVT</b> K.L                                       |
| 161 - 177   | 1880.8568 | 1879.8495 | 1879.9965 | -78.2 | 0 | R.S <b>IGVSNFSIE</b> M <b>LE</b> TI <b>IK</b> .D                                        |
| 161 - 177   | 1896.8464 | 1895.8391 | 1895.9914 | -80.3 | 0 | R.S <b>IGVSNFSIE</b> M <b>LE</b> TI <b>IK</b> .D + Oxidation (0)                        |
| 178 - 190   | 1399.6925 | 1398.6852 | 1398.7103 | -17.9 | 0 | K.D <b>TGVTPA</b> IN <b>QVER</b> .H                                                     |
| 194 - 201   | 923.5861  | 922.5789  | 922.5488  | 32.7  | 0 | R.L <b>PQPELV</b> K.Y                                                                   |
| 205 - 233   | 3211.2914 | 3210.2841 | 3210.6237 | -106  | 1 | K.E <b>KGIY</b> L <b>TAYS</b> A <b>FO</b> NN <b>SNGE</b> PL <b>LINT</b> PE <b>VK</b> .A |
| 234 - 238   | 559.4548  | 558.4476  | 558.3125  | 242   | 0 | K.A <b>IAER</b> .L                                                                      |
| 246 - 267   | 2444.2407 | 2443.2334 | 2443.3475 | -46.7 | 0 | K.E <b>VTPA</b> Q <b>VILAW</b> ST <b>L</b> D <b>NHIVIP</b> K.S                          |
| 276 - 289   | 1651.6655 | 1650.6582 | 1650.7624 | -63.1 | 0 | R.S <b>NFEE</b> VELDE <b>EAIK</b> .E                                                    |
| 276 - 293   | 2150.9036 | 2149.8963 | 2150.0266 | -60.6 | 1 | R.S <b>NFEE</b> VELDE <b>EAI</b> RE <b>LEK</b> .F                                       |
| 294 - 300   | 861.5414  | 860.5341  | 860.4504  | 97.3  | 0 | K.F <b>G</b> KE <b>PQR</b> .F                                                           |
| 306 - 320   | 1786.6544 | 1785.6471 | 1785.7734 | -70.7 | 0 | K.T <b>YSPD</b> W <b>IDV</b> FGDEK.E                                                    |
| 306 - 322   | 2043.7910 | 2042.7837 | 2042.9109 | -62.3 | 1 | K.T <b>YSPD</b> W <b>IDV</b> FGDEK.T                                                    |

Spot No.: **26**

NCBI accession No.: **gi/46128717**

Plant species: ***Fusarium graminearum PH-1***

Protein name: **peptidase C1-like family protein**

Mascot score: **92**

Sequence coverage %: **2**

The number of matched peptides with  $p \leq 0.05$ : **2**

Calculated Mr: **55346**

Calculated Pi: **5.53**

### Annotated MS spectra:

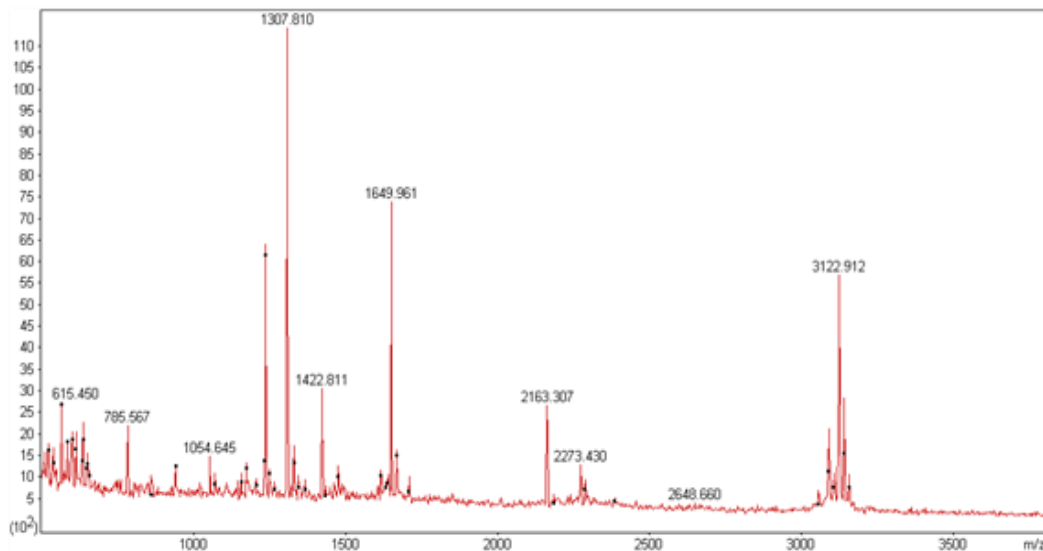

### Probability Based Mowse Score:

Ions score is  $-10 \cdot \log(P)$ , where P is the probability that the observed match is a random event. Individual ions scores  $> 48$  indicate identity or extensive homology ( $p < 0.05$ ). Protein scores are derived from ions scores as a non-probabilistic basis for ranking protein hits.

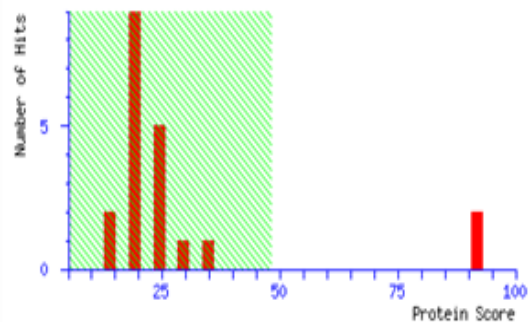

Matched peptide sequences: shown in **Bold Red**

```

1  MGAQSSKPTL HEKAVLDR LH SLQLQDDDEY VEISSDSEKA PLGPLVRDAQ
51 GLSVHVLESW QASILKDPKN KQVLTSLPTQ IADQQVFNVK IPFEGDPITN
101 QRSSGRCWLF ASTNVFRVAL MKRYNLESFE LSQQYLFYWD KLEKSNWFLE
151 QVIDTAGEDL EGRLVQNLG DIVSDGGQWD MVYNLVEKYG LVPQTLYPDT
201 WNAQSSGILN NVIKTKLREF ALKLRGLINS QNGVSATALS SAKDKMMREI
251 SLIMTLLLGP PPSPEDAFTW QYNDKNGKAH EVKATPREFA KNIYSSEFRI
301 TSTTIDSMIS LVHDP RHEPL NLLSVSRLGN IVGGRGVSYV NVDIDTLKKT
351 CIKMLKAGIP IFFGSDVGKF SDSTSGIMDL DLFNYELGFN TSLLGMSKAQ
401 RLTTKESQMT HAMVLTAVHL DEETGKPV RW RVQNSWGTTA GDKGW FVMSD
451 AWLDEFVYQA VVDP RFCSKE VRDVLKKEAI ILPPWDPMGA LA

```

### Matched peptides information:

| Query             | Start - End | Observed  | Nr (expt) | Nr (calc) | ppm  | H | Score | Expect  | Rank     | U | Peptide          |
|-------------------|-------------|-----------|-----------|-----------|------|---|-------|---------|----------|---|------------------|
| <a href="#">1</a> | 357 - 369   | 1307.8101 | 1306.8028 | 1306.6922 | 84.7 | 0 | 92    | 2.7e-06 | <u>1</u> | 0 | K.AGIPFFGSDVGK.F |
| <a href="#">2</a> | 357 - 369   | 1307.8101 | 1306.8028 | 1306.6922 | 84.7 | 0 | 92    | 2.7e-06 | <u>1</u> | 0 | K.AGIPFFGSDVGK.F |

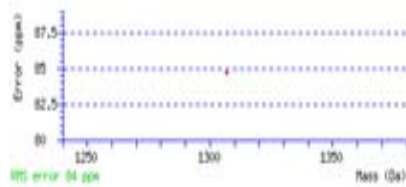

## Annotated ion spectra of the matched peptides with $p \leq 0.05$ :

CID No.: **26-1307.8**

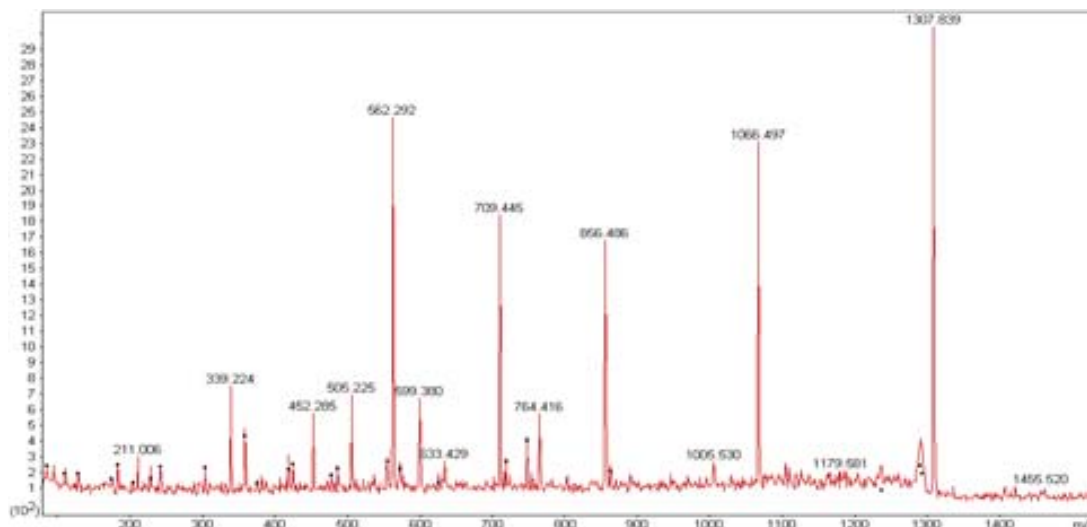

MS/MS Fragmentation of **K.AGIPIFFGSDVGK.F**

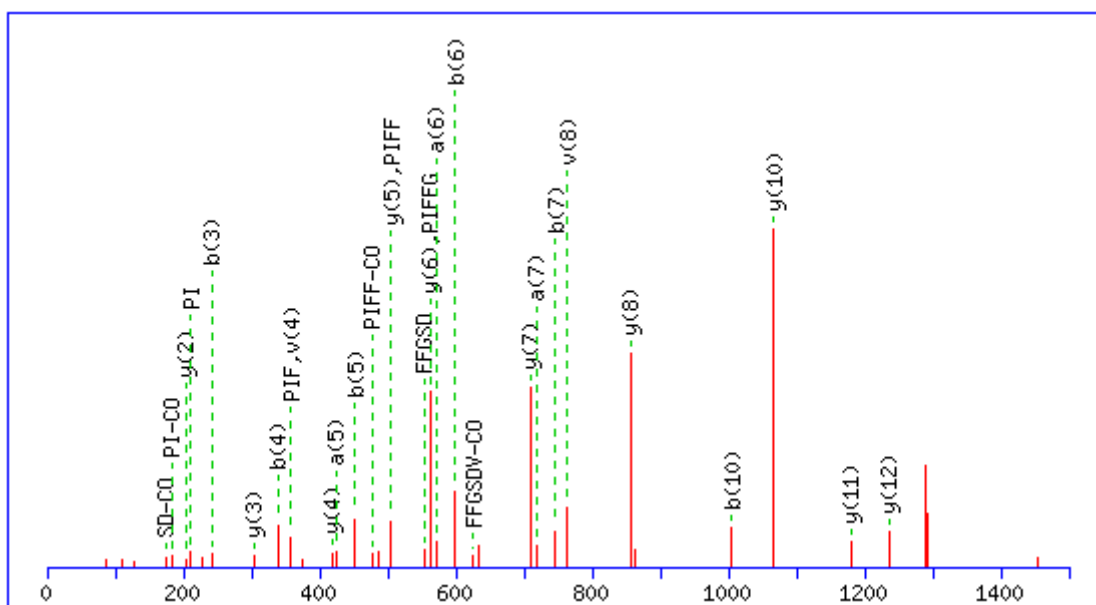

Monoisotopic mass of neutral peptide  $M_r(\text{calc})$ : 1306.6922

| #  | Immon.   | a         | a <sup>0</sup> | b         | b <sup>0</sup> | d         | d'       | Seq. | v         | w         | w'        | y         | y <sup>+</sup> | y <sup>0</sup> | #  |
|----|----------|-----------|----------------|-----------|----------------|-----------|----------|------|-----------|-----------|-----------|-----------|----------------|----------------|----|
| 1  | 44.0495  | 44.0495   |                | 72.0444   |                | 44.0495   |          | A    |           |           |           |           |                |                | 13 |
| 2  | 30.0338  | 101.0709  |                | 129.0659  |                |           |          | G    |           |           |           | 1236.6623 | 1219.6358      | 1218.6517      | 12 |
| 3  | 86.0964  | 214.1550  |                | 242.1499  |                | 186.1237  | 200.1394 | I    | 1121.5626 | 1134.5830 | 1148.5986 | 1179.6408 | 1162.6143      | 1161.6303      | 11 |
| 4  | 70.0651  | 311.2078  |                | 339.2027  |                | 285.1921  |          | P    | 1024.5098 | 1023.5146 |           | 1066.5568 | 1049.5302      | 1048.5462      | 10 |
| 5  | 86.0964  | 424.2918  |                | 452.2867  |                | 396.2605  | 410.2762 | I    | 911.4258  | 924.4462  | 938.4618  | 969.5040  | 952.4775       | 951.4934       | 9  |
| 6  | 120.0808 | 571.3602  |                | 599.3552  |                |           |          | F    | 764.3573  |           |           | 856.4199  | 839.3934       | 838.4094       | 8  |
| 7  | 120.0808 | 718.4287  |                | 746.4236  |                |           |          | F    | 617.2889  |           |           | 709.3515  | 692.3250       | 691.3410       | 7  |
| 8  | 30.0338  | 775.4501  |                | 803.4450  |                |           |          | G    |           |           |           | 562.2831  | 545.2566       | 544.2726       | 6  |
| 9  | 60.0444  | 862.4822  | 844.4716       | 890.4771  | 872.4665       | 846.4872  |          | S    | 473.2354  | 472.2402  |           | 505.2617  | 488.2351       | 487.2511       | 5  |
| 10 | 88.0393  | 977.5091  | 959.4985       | 1005.5040 | 987.4934       | 933.5193  |          | D    | 358.2085  | 357.2132  |           | 418.2296  | 401.2031       | 400.2191       | 4  |
| 11 | 72.0808  | 1076.5775 | 1058.5669      | 1104.5724 | 1086.5619      | 1062.5619 |          | V    | 259.1401  | 272.1605  |           | 303.2027  | 286.1761       |                | 3  |
| 12 | 30.0338  | 1133.5990 | 1115.5884      | 1161.5939 | 1143.5833      |           |          | G    |           |           |           | 204.1343  | 187.1077       |                | 2  |
| 13 | 101.1073 |           |                |           |                |           |          | K    | 74.0237   | 73.0284   |           | 147.1128  | 130.0863       |                | 1  |

| Seq           | ya       | yb       | Seq            | ya       | yb       | Seq           | ya       | yb       |
|---------------|----------|----------|----------------|----------|----------|---------------|----------|----------|
| <b>GI</b>     | 143.1179 | 171.1128 | <b>GIP</b>     | 240.1707 | 268.1656 | <b>GIPI</b>   | 353.2547 | 381.2496 |
| <b>GIPIF</b>  | 500.3231 | 528.3180 | <b>GIPIFF</b>  | 647.3915 | 675.3865 | <b>IP</b>     | 183.1492 | 211.1441 |
| <b>IPI</b>    | 296.2333 | 324.2282 | <b>IPIF</b>    | 443.3017 | 471.2966 | <b>IPIFF</b>  | 590.3701 | 618.3650 |
| <b>IPIFFG</b> | 647.3915 | 675.3865 | <b>PI</b>      | 183.1492 | 211.1441 | <b>PIF</b>    | 330.2176 | 358.2125 |
| <b>PIFF</b>   | 477.2860 | 505.2809 | <b>PIFFG</b>   | 534.3075 | 562.3024 | <b>PIFFGS</b> | 621.3395 | 649.3344 |
| <b>IF</b>     | 233.1648 | 261.1598 | <b>IFF</b>     | 380.2333 | 408.2282 | <b>IFFG</b>   | 437.2547 | 465.2496 |
| <b>IFFGS</b>  | 524.2867 | 552.2817 | <b>IFFGSD</b>  | 639.3137 | 667.3086 | <b>FF</b>     | 267.1492 | 295.1441 |
| <b>FFG</b>    | 324.1707 | 352.1656 | <b>FFGS</b>    | 411.2027 | 439.1976 | <b>FFGSD</b>  | 526.2296 | 554.2245 |
| <b>FFGSDV</b> | 625.2980 | 653.2930 | <b>FFGSDVG</b> | 682.3195 | 710.3144 | <b>FG</b>     | 177.1022 | 205.0972 |
| <b>FGS</b>    | 264.1343 | 292.1292 | <b>FGSD</b>    | 379.1612 | 407.1561 | <b>FGSDV</b>  | 478.2296 | 506.2245 |
| <b>FGSDVG</b> | 535.2511 | 563.2460 | <b>GS</b>      | 117.0659 | 145.0608 | <b>GSD</b>    | 232.0928 | 260.0877 |
| <b>GSDV</b>   | 331.1612 | 359.1561 | <b>GSDVG</b>   | 388.1827 | 416.1776 | <b>SD</b>     | 175.0713 | 203.0662 |
| <b>SDV</b>    | 274.1397 | 302.1347 | <b>SDVG</b>    | 331.1612 | 359.1561 | <b>DV</b>     | 187.1077 | 215.1026 |
| <b>DVG</b>    | 244.1292 | 272.1241 | <b>VG</b>      | 129.1022 | 157.0972 |               |          |          |

Spot No.: **27**

Mascot score: **208**

Species: *Fusarium oxysporum Fo5176*

Protein name: **NADP-dependent glycerol dehydrogenase**

NCBI accession No.: **gi| 342888721**      Sequence coverage %: **61**

Matched peptides No.: **23**      Total peptides No.: **47**

Calculated Mr: **37413**      Calculated pI: **5.91**

### Annotated PMF spectra:

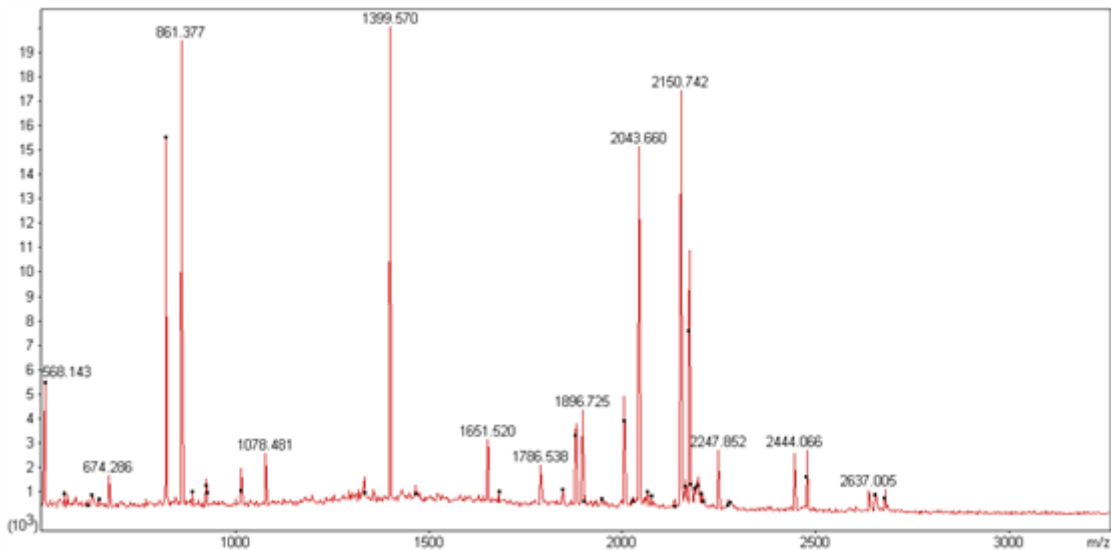

### Probability Based Mowse Score:

Protein score is  $-10 \cdot \log(P)$ , where P is the probability that the observed match is a random event. Protein scores greater than 75 are significant ( $p < 0.05$ ).

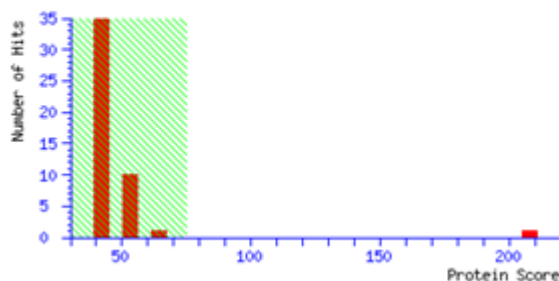

Matched peptide sequences: shown in **Bold Red**

1 MSFGRTVTLN **SGHKMPQIGY** **GTWQAAPGEV** **GNGVYEALKA** GYRHLDLAKI  
 51 **YQNQREVGEG** **IKKALNDVPG** **LKREDIFITG** **KLWNNKHRPE** EVPGALDDSL  
 101 EELGLDYLDL **WLIHWPVAFK** **NGPELFPLKA** **DDKNKTELDQ** **GVTLSQTWEA**  
 151 **VTKLPKEKVR** **SIGVSNFSIE** **MLETIIKDTG** **VTPAINQVER** **HPRLPQPELV**  
 201 **KYQKEKGIYL** **TAYSAFGNNS** **WGEPLLINTP** **EVKAIARLS** **KSKGKEVTPA**  
 251 **QVILAWSTLD** **NHIVIPKSVT** **PARIRSNFEE** **VELDEEAIKE** **LEKFGEKPQR**  
 301 **FNIPKTYSPD** **WDIDVFGDEK** **EKTATHKVVL** KL

Matched peptides information:

| Start - End | Observed  | Mr (expt) | Mr (calc) | ppm   | M | Peptide                                      |
|-------------|-----------|-----------|-----------|-------|---|----------------------------------------------|
| 15 - 39     | 2637.0051 | 2635.9978 | 2635.2741 | 275   | 0 | K.MPQIGYGTWQAAPGEVGNVYEALK.A                 |
| 15 - 39     | 2652.9932 | 2651.9859 | 2651.2690 | 270   | 0 | K.MPQIGYGTWQAAPGEVGNVYEALK.A + Oxidation (0) |
| 50 - 55     | 821.3569  | 820.3496  | 820.4191  | -84.7 | 0 | K.IYQNR.E                                    |
| 64 - 72     | 926.4301  | 925.4228  | 925.5233  | -109  | 0 | K.ALNDVPGLE.R                                |
| 73 - 81     | 1078.4807 | 1077.4734 | 1077.5818 | -101  | 1 | K.REDIFITGK.L                                |
| 82 - 86     | 674.2861  | 673.2788  | 673.3547  | -113  | 0 | K.LWNNK.H                                    |
| 121 - 129   | 1014.4284 | 1013.4211 | 1013.5546 | -132  | 0 | K.NGPELFPLK.A                                |
| 134 - 153   | 2247.8521 | 2246.8448 | 2247.1383 | -131  | 1 | K.NKTELDQVTVLSQTWEAVTK.L                     |
| 136 - 153   | 2005.7168 | 2004.7095 | 2005.0004 | -145  | 0 | K.TELDQVTVLSQTWEAVTK.L                       |
| 159 - 177   | 2135.7486 | 2134.7413 | 2135.1660 | -199  | 1 | K.VRSIGVSNFSIEMLETIIK.D                      |
| 161 - 177   | 1880.7529 | 1879.7456 | 1879.9965 | -133  | 0 | R.SIGVSNFSIEMLETIIK.D                        |
| 161 - 177   | 1896.7250 | 1895.7177 | 1895.9914 | -144  | 0 | R.SIGVSNFSIEMLETIIK.D + Oxidation (0)        |
| 178 - 190   | 1399.5701 | 1398.5628 | 1398.7103 | -105  | 0 | K.DTVTPAINQVER.H                             |
| 194 - 201   | 923.4364  | 922.4292  | 922.5488  | -130  | 0 | R.LPQPELVK.Y                                 |
| 234 - 238   | 559.2924  | 558.2851  | 558.3125  | -49.1 | 0 | K.AIAER.L                                    |
| 246 - 267   | 2444.0661 | 2443.0588 | 2443.3475 | -118  | 0 | K.EVTPAQVILAWSTLDNHIVIPK.S                   |
| 268 - 273   | 630.3376  | 629.3303  | 629.3497  | -30.8 | 0 | K.SVTPAR.I                                   |
| 276 - 289   | 1651.5197 | 1650.5124 | 1650.7624 | -151  | 0 | R.SNFEEVELDEEAIK.E                           |
| 276 - 293   | 2150.7421 | 2149.7348 | 2150.0266 | -136  | 1 | R.SNFEEVELDEEAIKLEK.F                        |
| 294 - 300   | 861.3772  | 860.3699  | 860.4504  | -93.6 | 0 | K.FGEKPQR.F                                  |
| 301 - 305   | 618.2957  | 617.2884  | 617.3537  | -106  | 0 | R.FNIPK.T                                    |
| 306 - 320   | 1786.5385 | 1785.5312 | 1785.7734 | -136  | 0 | K.TYSPDMDIDVFGDEK.E                          |
| 306 - 322   | 2043.6600 | 2042.6527 | 2042.9109 | -126  | 1 | K.TYSPDMDIDVFGDEK.E                          |

Spot No.: **28**

Mascot score: **122**

Species: *Fusarium oxysporum f. sp. cubense race 1*

Protein name: **Superoxide dismutase [Mn], mitochondrial**

NCBI accession No.: **gi| 477512799**      Sequence coverage %: **55**

Matched peptides No.: **10**      Total peptides No.: **59**

Calculated Mr: **21308**      Calculated pI: **7.07**

### Annotated PMF spectra:

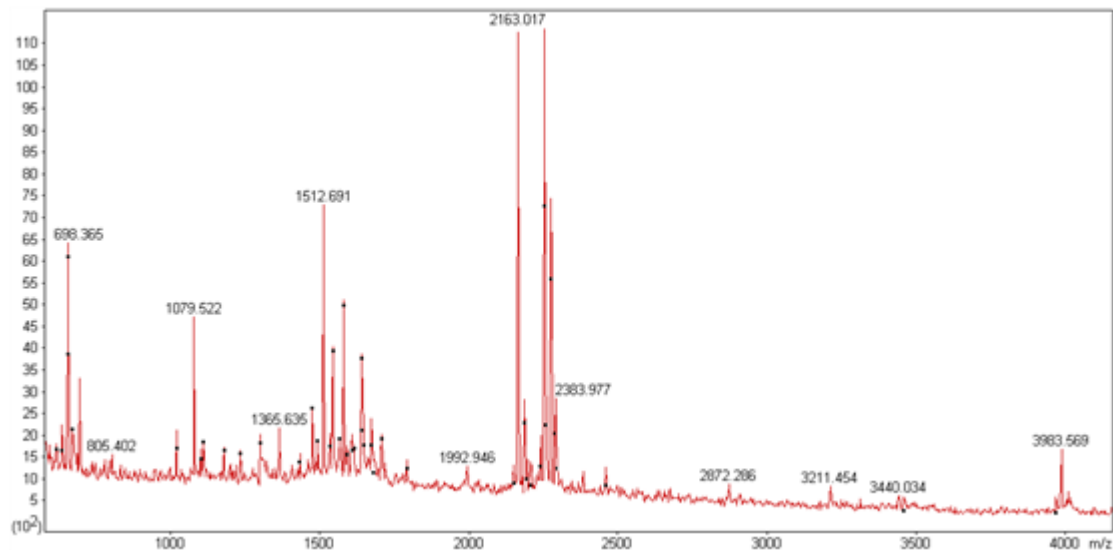

### Probability Based Mowse Score:

Protein score is  $-10 \cdot \log(P)$ , where P is the probability that the observed match is a random event. Protein scores greater than 75 are significant ( $p < 0.05$ ).

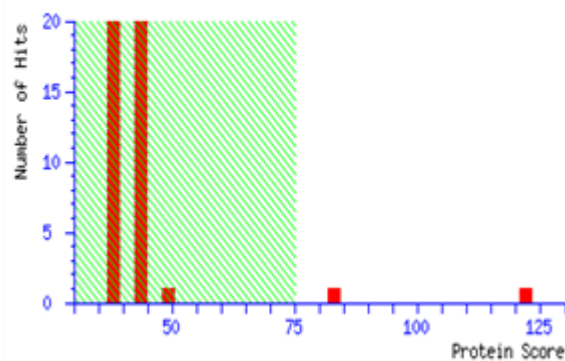



Matched peptide sequences: shown in **Bold Red**

1 MSVGTYSLPA LPYAYDALEP SISAQIMELH HSKHHQAYVT NLNAALKNYA  
 51 **TATSTNDIAG QIALQSAIKF** NGGGHINHSL FWENLSPSSS ADAKPESAPT  
 101 **LSAEISKTWG SIQAFQEAFF** KTLGLQSG WGWLVKDTHG LRIVTTKDQD  
 151 PVVGGEYLNQ **KAAVVDNIWK VINWKTAEAR** FTGTREDAFK VLRASI

Matched peptides information:

| Start - End | Observed  | Mr(expt)  | Mr(calc)  | ppm   | M | Peptide                                    |
|-------------|-----------|-----------|-----------|-------|---|--------------------------------------------|
| 34 - 47     | 1579.7875 | 1578.7802 | 1578.8266 | -29.4 | 0 | K.EHQAYVTHLNAALK.N                         |
| 48 - 69     | 2251.1317 | 2250.1244 | 2250.1492 | -11.0 | 0 | K.NYATATSTNDIAGQIALQSAIK.F                 |
| 70 - 107    | 3983.5690 | 3982.5617 | 3981.9133 | 163   | 0 | K.FNQGHHINHSLFWENLSPSSSADAKPESAPTLSAEISK.T |
| 108 - 120   | 1512.6914 | 1511.6841 | 1511.7409 | -37.5 | 0 | K.TWQSIQAFQEAFF.K                          |
| 108 - 121   | 1640.7960 | 1639.7887 | 1639.8358 | -28.7 | 1 | K.TWQSIQAFQEAFFK.T                         |
| 122 - 136   | 1614.8054 | 1613.7981 | 1613.8930 | -58.8 | 0 | K.TLLGLQSGWGWLVK.D                         |
| 137 - 142   | 698.3650  | 697.3577  | 697.3507  | 10.0  | 0 | K.DTBQLR.I                                 |
| 162 - 170   | 1079.5220 | 1078.5147 | 1078.5447 | -27.8 | 0 | K.AAVVDNIWK.V                              |
| 171 - 175   | 659.3752  | 658.3679  | 658.3802  | -18.8 | 0 | K.VINWK.T                                  |
| 181 - 185   | 581.3272  | 580.3199  | 580.2969  | 39.7  | 0 | R.FTOTR.E                                  |

Spot No.: 29

Mascot score: 84

Species: *Fusarium oxysporum Fo5176*

Protein name: vacuolar protease A

NCBI accession No.: gi| 342882947      Sequence coverage %: 19

Matched peptides No.: 8      Total peptides No.: 49

Calculated Mr: 42978      Calculated pI: 4.66

### Annotated PMF spectra:

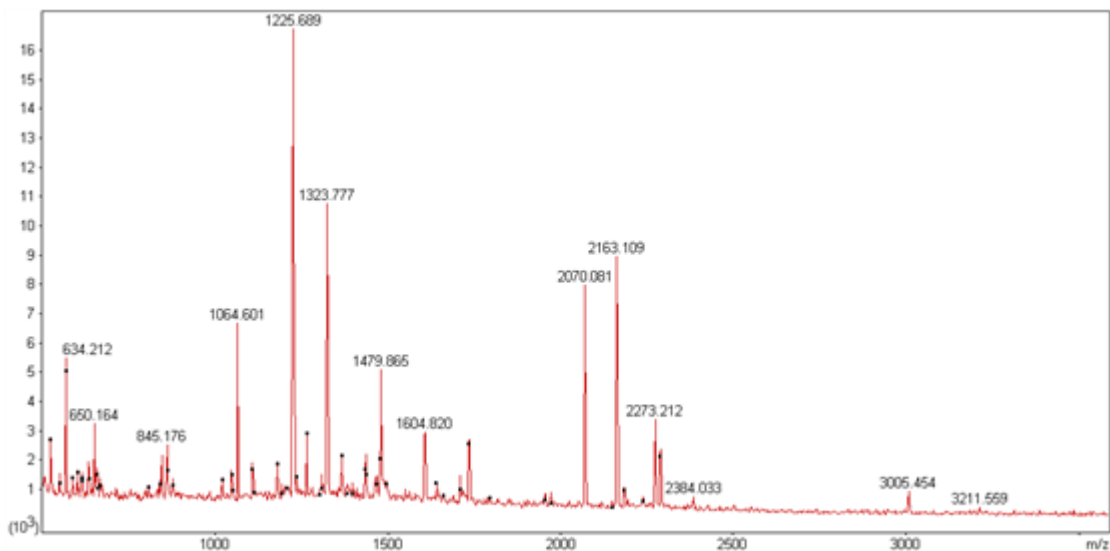

### Probability Based Mowse Score:

Protein score is  $-10 \cdot \log(P)$ , where P is the probability that the observed match is a random event. Protein scores greater than 75 are significant ( $p < 0.05$ ).

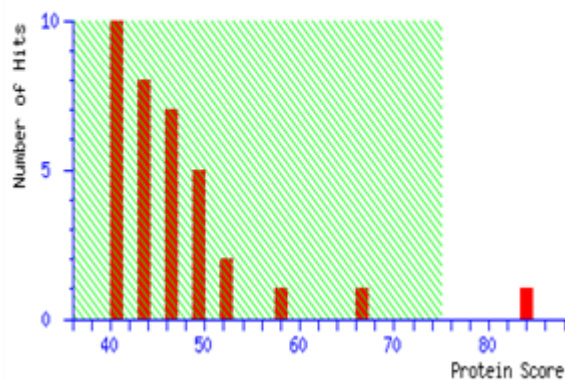

Matched peptide sequences: shown in **Bold Red**

```

1 MKGALLTAAA LLGSAQAGVH KMKLNKVPLA DQLATNSVED HLQSLGQKYL
51 GASRPKNAAD YAFATNTVNV EGGHPVPVSN FMNAQYFSEI TIGTPPQSFK
101 VVLDTGSSNL WVPSQQCGSI ACYLHISKYDS SASSTYKENG TEFEIHYGSG
151 SLSGFVSNDV VSIGDLEIKD QDFAEATKEP GLAFAFGRFD GILGLGYDRI
201 AVNGMVPPFY QMVNQKLLDE PVFAFYLDDQ EGSEATFGG IDKSKFTGDI
251 EYIPLRRKAY WEVDLEAIAF GDEVAEQENT GAILDTGTSL NVLPSALAEI
301 LNKEIGAKKG YNGQYTIECD KRASLPDITF NLAGSNYSLP ATDYILEVQG
351 SCISTFQGMDFPEVGPPLVI LGDAFLRRYY SVYDLGKNAV GLARAK

```

Matched peptides information:

| Start - End | Observed  | Mr (expt) | Mr (calc) | ppm  | M | Peptide                               |
|-------------|-----------|-----------|-----------|------|---|---------------------------------------|
| 170 - 188   | 2070.0807 | 2069.0734 | 2068.9854 | 42.5 | 1 | <b>K.DQDFAEATKEPGLAFAFGR.F</b>        |
| 179 - 188   | 1064.6010 | 1063.5937 | 1063.5451 | 45.7 | 0 | <b>K.EPGLAFAFGR.F</b>                 |
| 189 - 199   | 1225.6887 | 1224.6814 | 1224.6139 | 55.1 | 0 | <b>R.FDGILOLOYDR.I</b>                |
| 217 - 243   | 3005.4543 | 3004.4470 | 3004.3866 | 20.1 | 0 | <b>K.LLDEPVFAFYLDDQEGSEATFGGIDK.S</b> |
| 246 - 256   | 1323.7772 | 1322.7699 | 1322.6870 | 62.7 | 0 | <b>K.FTGDIEYIPLR.R</b>                |
| 246 - 257   | 1479.8653 | 1478.8580 | 1478.7881 | 47.3 | 1 | <b>K.FTGDIEYIPLR.K</b>                |
| 378 - 387   | 1263.6825 | 1262.6752 | 1262.6295 | 36.2 | 1 | <b>R.RYYSVYDLGK.N</b>                 |
| 379 - 387   | 1107.5764 | 1106.5691 | 1106.5284 | 36.8 | 0 | <b>R.YYSVYDLGR.N</b>                  |

Spot No.: **30**

Mascot score: **119**

Species: *Fusarium oxysporum f. sp. cubense race 4*

Protein name: **Actin**

NCBI accession No.: **gi| 475667318**      Sequence coverage %: **53**

Matched peptides No.: **19**      Total peptides No.: **62**

Calculated Mr: **45188**      Calculated pI: **6.08**

### Annotated PMF spectra:

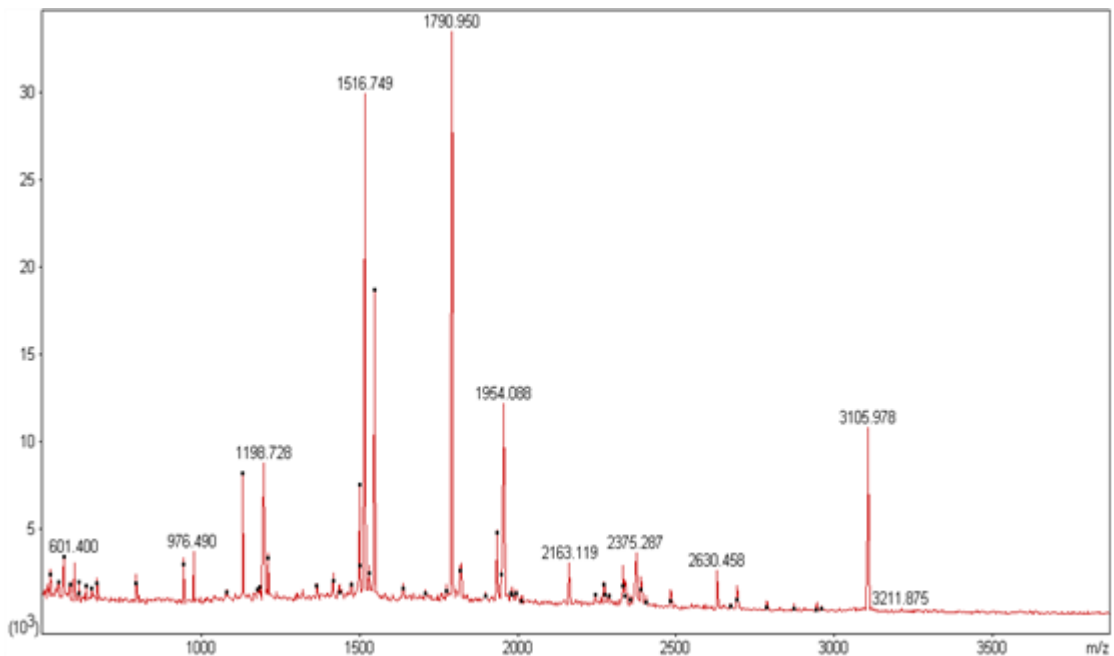

### Probability Based Mowse Score:

Protein score is  $-10 \cdot \log(P)$ , where P is the probability that the observed match is a random event. Protein scores greater than 75 are significant ( $p < 0.05$ ).

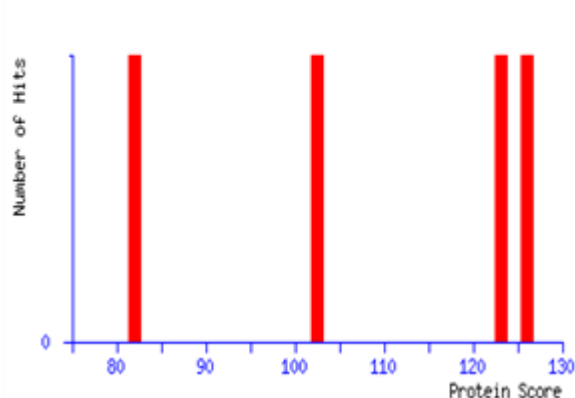

Matched peptide sequences: shown in **Bold Red**

1 MGKLPRLSHR **PLDYLPASLL** LDQICHPIVR CPTLASTLML GDSGMCKAGF  
 51 **AGDDAPRAVF** **PSIVGRPRHH** GIMIGMQKD SYVGDEAQS KRGILTLRYPI  
 101 **EHGVVTNWDD** **MEKIWHHTFY** NELRVAP~~EEH~~ **PVLLTEAPIN** PKSNREKMTQ  
 151 IVFETFNAPA FYVSIQAVLS LYASGR**TTGI** **VLDSDG**~~GVTH~~ **VVPIYEGFAL**  
 201 **PHAIARV**~~DMA~~ GRDLTDYLMK **ILA**~~ERGYTFS~~ **TTAEREIVRD** IKEKLCYVAL  
 251 **DFEQEIQTAA** **QSSSLEKSYE** LPDGQVITIG **NERFRAPEAL** FQPSVLGLES  
 301 **GGIHVTTFNS** **IMKCDVDVRK** **DLYGNIVMSG** **GTTMYPGLSD** RMQKEITALA  
 351 **PSSMKVKIIA** **PPERKYSVWI** GGSILASLST **FQQMWISKQE** YDESGPSIVH  
 401 **RKCF**

Matched peptides information:

| Start - End | Observed  | Nr (expt) | Mr (calc) | ppm  | M | Peptide                                          |
|-------------|-----------|-----------|-----------|------|---|--------------------------------------------------|
| 48 - 57     | 976.4897  | 975.4824  | 975.4410  | 42.4 | 0 | K.AGFAGDDAPR.A                                   |
| 58 - 68     | 1198.7279 | 1197.7206 | 1197.6982 | 18.7 | 0 | R.AVFFSIVGRPR.H                                  |
| 92 - 97     | 672.4815  | 671.4742  | 671.4330  | 61.3 | 0 | R.GILTLR.Y                                       |
| 98 - 113    | 1932.9029 | 1931.8956 | 1931.8724 | 12.0 | 0 | R.YPIESGVVTHDDMEK.I                              |
| 98 - 113    | 1948.9175 | 1947.9102 | 1947.8673 | 22.0 | 0 | R.YPIESGVVTHDDMEK.I + Oxidation (0)              |
| 125 - 142   | 1954.0884 | 1953.0811 | 1953.0571 | 12.3 | 0 | R.VAPEEHPVLLTEAPINPK.S                           |
| 177 - 206   | 3105.9781 | 3104.9708 | 3104.6295 | 110  | 0 | R.TTGIVLDSDGQVITIVVPIYEGFALPHAIAR.V              |
| 221 - 225   | 601.4004  | 600.3932  | 600.3595  | 56.1 | 0 | K.ILAE.R                                         |
| 226 - 235   | 1132.5483 | 1131.5410 | 1131.5197 | 18.9 | 0 | R.GYTFSTTAER.E                                   |
| 245 - 267   | 2630.4579 | 2629.4506 | 2629.2581 | 73.2 | 0 | K.LCYVALDFEQEIQTAAQSSSLER.S                      |
| 268 - 283   | 1790.9495 | 1789.9422 | 1789.8846 | 32.2 | 0 | K.SYELPDGQVITIGNER.F                             |
| 286 - 313   | 2943.8382 | 2942.8309 | 2942.5212 | 105  | 0 | R.APEALFQPSVLGLESOGIHVTTFNSIMK.C                 |
| 286 - 313   | 2959.8376 | 2958.8303 | 2958.5161 | 106  | 0 | R.APEALFQPSVLGLESOGIHVTTFNSIMK.C + Oxidation (0) |
| 320 - 341   | 2375.2868 | 2374.2795 | 2374.1297 | 63.1 | 1 | R.KDLYGNIVMSGOTTMYPOLSDR.M                       |
| 320 - 341   | 2391.2738 | 2390.2665 | 2390.1246 | 59.4 | 1 | R.KDLYGNIVMSGOTTMYPOLSDR.M + Oxidation (0)       |
| 320 - 341   | 2407.2989 | 2406.2916 | 2406.1196 | 71.5 | 1 | R.KDLYGNIVMSGOTTMYPOLSDR.M + 2 Oxidation (0)     |
| 321 - 341   | 2247.1802 | 2246.1729 | 2246.0348 | 61.5 | 0 | K.DLYGNIVMSGOTTMYPOLSDR.M                        |
| 358 - 364   | 795.4856  | 794.4783  | 794.4650  | 16.8 | 0 | K.IIAPPER.K                                      |
| 389 - 401   | 1516.7492 | 1515.7419 | 1515.6954 | 30.7 | 0 | K.QEYDESOPSIIVH.R                                |

Spot No.: **31**

Mascot score: **159**

Species: *Fusarium oxysporum f. sp. cubense race 4*

Protein name: **phosphoglycerate kinase**

NCBI accession No.: **gi| 475667960**      Sequence coverage %: **57**

Matched peptides No.: **21**      Total peptides No.: **59**

Calculated Mr: **44835**      Calculated pI: **5.77**

### Annotated PMF spectra:

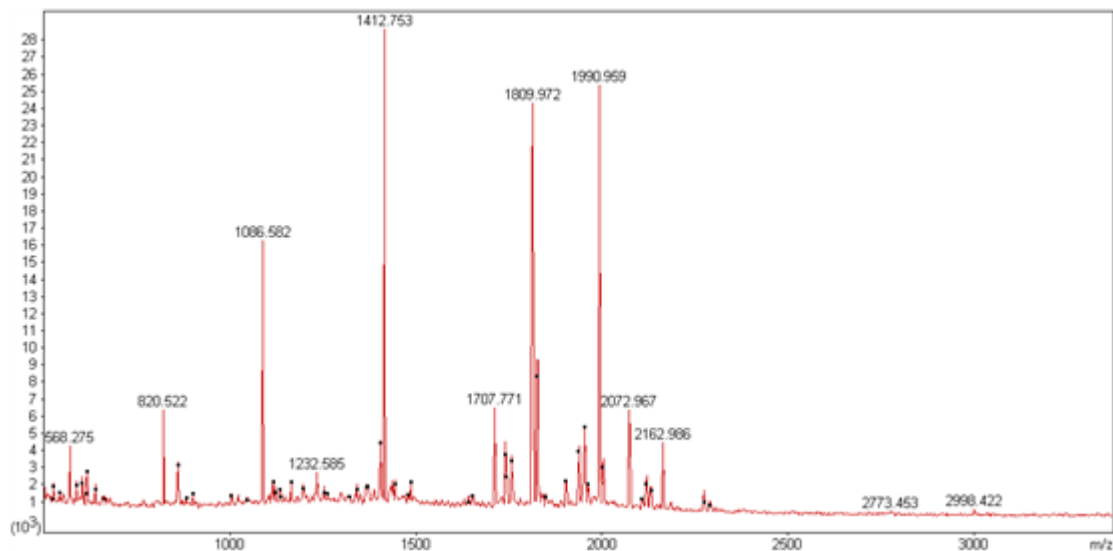

### Probability Based Mowse Score:

Protein score is  $-10 \cdot \log(P)$ , where P is the probability that the observed match is a random event. Protein scores greater than 75 are significant ( $p < 0.05$ ).

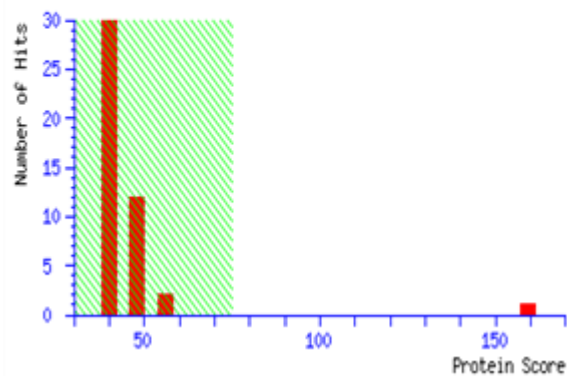

## Matched peptide sequences: shown in **Bold Red**

```

1  MSLSNKLSIT DVDVKGKRVL IRVDFNVPLD ADKNITMNQR IVGALPTIKY
51 ALENGAKSVI LMSHLGRPNG SPNEKYSLKP VVPELEKLLG KKVTTFAPDCV
101 GPEVEEIVNK AEDGAVILLE NLRFHIEEEG SSKDKEGNKT KADKAQVEAF
151 RKGLTALGDV YINDAFGTAH RAHSSMVGVD LPQKASGFLV KKELEYFAKA
201 LEEPQRPFLA ILGGAKVSDK IQLIDNLLDK VNTLIICGGM AFTFKKTLEG
251 VSIGNSLFDE AGSKTVGNLV EKAKAKGVKL VLPVDYITAD KFDKDANTGY
301 ATDKDGIPDG WQGLDCGEES VKLYKEAIAE AKTILWNGPA GVFEFEKFAFAS
351 GTKATLDAVV DAVQKDGKIV IIGGGDTATV AKKYGVEDKL SHVSTGGGAS
401 LELLEKELP GVTALSSK

```

## Matched peptides information:

| Start - End | Observed  | Mr (expt) | Mr (calc) | ppm   | M | Peptide                          |
|-------------|-----------|-----------|-----------|-------|---|----------------------------------|
| 23 - 33     | 1232.5850 | 1231.5777 | 1231.6085 | -25.0 | 0 | R.VDFNVPLDADK.N                  |
| 23 - 40     | 2072.9674 | 2071.9601 | 2072.0287 | -33.1 | 1 | R.VDFNVPLDADSNITMNQR.I           |
| 76 - 87     | 1401.7413 | 1400.7340 | 1400.7915 | -41.0 | 0 | K.YSLKPVVPELEK.L                 |
| 92 - 110    | 2131.0086 | 2130.0013 | 2130.0667 | -30.7 | 1 | K.KVTTFAPDCVGPPEVEEIVNK.A        |
| 93 - 110    | 2002.8771 | 2001.8698 | 2001.9718 | -50.9 | 0 | K.VTFAPDCVGPPEVEEIVNK.A          |
| 111 - 123   | 1412.7534 | 1411.7461 | 1411.7671 | -14.8 | 0 | K.AEDGAVILLENLR.F                |
| 124 - 133   | 1162.5477 | 1161.5404 | 1161.5302 | 8.80  | 0 | R.FHIEEBOSSK.D                   |
| 142 - 151   | 1134.5684 | 1133.5611 | 1133.5829 | -19.2 | 1 | K.ADKAQVEAFR.K                   |
| 145 - 151   | 820.5223  | 819.5150  | 819.4239  | 111   | 0 | K.AQVEAFR.K                      |
| 152 - 171   | 2119.0557 | 2118.0484 | 2118.0858 | -17.6 | 1 | R.KGLTALGDVYINDAFGTAHR.A         |
| 153 - 171   | 1990.9585 | 1989.9512 | 1989.9908 | -19.9 | 0 | K.GLTALGDVYINDAFGTAHR.A          |
| 172 - 184   | 1368.6914 | 1367.6841 | 1367.6867 | -1.91 | 0 | R.AHSSMVGVDLPQK.A                |
| 193 - 199   | 899.4973  | 898.4900  | 898.4436  | 51.7  | 0 | K.ELEYFAK.A                      |
| 200 - 216   | 1809.9722 | 1808.9649 | 1809.0148 | -27.6 | 0 | K.ALEEPQRPFLAILLOGAK.V           |
| 247 - 264   | 1823.7863 | 1822.7790 | 1822.8949 | -63.5 | 0 | K.TLEGVSGNSLFDEAGSK.T            |
| 265 - 272   | 859.4871  | 858.4798  | 858.4811  | -1.51 | 0 | K.TVGNLVER.K                     |
| 280 - 294   | 1736.8318 | 1735.8245 | 1735.9396 | -66.3 | 1 | K.LVLPVDYITADKFDK.D              |
| 295 - 322   | 2998.4218 | 2997.4145 | 2997.2934 | 40.4  | 1 | K.DANTGYATDRDGIPOGWQGLDCGEESVK.L |
| 305 - 322   | 1961.7666 | 1960.7593 | 1960.8473 | -44.9 | 0 | K.DOIPDQWQGLDCGEESVK.L           |
| 333 - 347   | 1707.7714 | 1706.7641 | 1706.8668 | -60.2 | 0 | K.TILMNGPAGVFEFK.F               |
| 390 - 407   | 1754.8226 | 1753.8153 | 1753.9210 | -60.3 | 0 | K.LSHVSTGGGASLELLEK.E            |

Spot No.: **32**

Mascot score: **123**

Species: *Fusarium oxysporum f. sp. cubense race 4*

Protein name: **elongation factor 1-gamma**

NCBI accession No.: **gi| 475667235**      Sequence coverage %: **51**

Matched peptides No.: **19**      Total peptides No.: **72**

Calculated Mr: **46170**      Calculated pI: **5.64**

### Annotated PMF spectra:

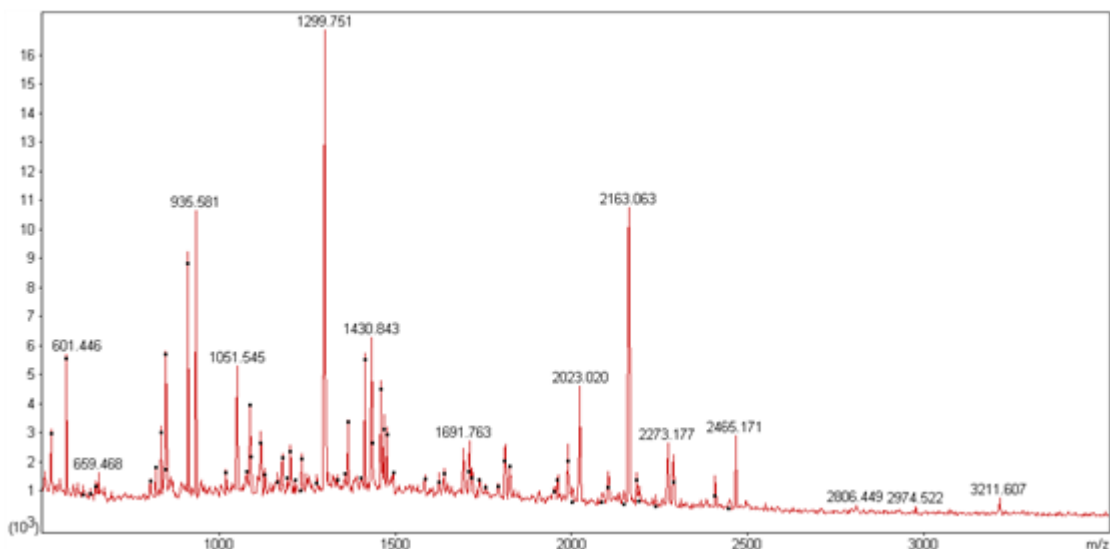

### Probability Based Mowse Score:

Protein score is  $-10 \cdot \log(P)$ , where P is the probability that the observed match is a random event. Protein scores greater than 75 are significant ( $p < 0.05$ ).

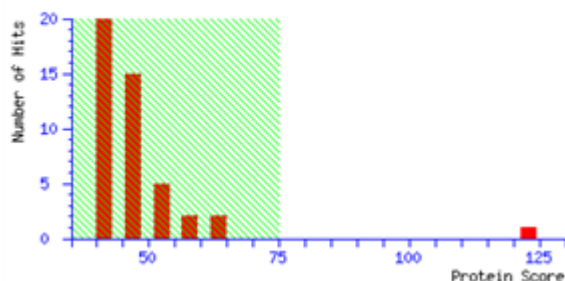



## Matched peptide sequences: shown in **Bold Red**

1 **MAFGTLFTRE** **NNCRSTAIRA** **VAKANDIELN** **IVEAEKGNAT** **VEHLKANGLG**  
 51 **KIPAFIGEDG** **FALSECIAIA** **IYITSQNEKT** **TLLGKTKQDY** **ASILKWSMFF**  
 101 **NSEVLPSLIA** **WFGPLKGDAP** **YNKKNVDDAS** **KASLKAFSVV** **EEHLIRNTFL**  
 151 **VGERITLADL** **FAAGIAVRGF** **QYFFDKQWRE** **ENPAVTRWFE** **TVRAQPIFAE**  
 201 **VAEKVELLET** **PALTNTPPKK** **PEQPKKEAKK** **EVKKEAAPAA** **EAAPASDEAP**  
 251 **AAPKAKHPLE** **ALGRPSRQYS** **NIKDNEAMK** **YFWDNFNFE** **YSIWKVDYKY**  
 301 **NEELTLTFMS** **NNLIGGFNNR** **LEGSRKYIFG** **CAAVYGENND** **SVIQGAFFVIR**  
 351 **GQEHVPAFDV** **APDWESYNFE** **KLDPTNPEHR** **QFVEDAWGWE** **KPITVNGKEY**  
 401 **KLADGKVKF**

## Matched peptides information:

| Start - End | Observed  | Mr(expt)  | Mr(calc)  | ppm   | M | Peptide                        |
|-------------|-----------|-----------|-----------|-------|---|--------------------------------|
| 1 - 14      | 1716.8667 | 1715.8594 | 1715.7872 | 42.1  | 1 | - .MAFGTLFTRENNCR. S           |
| 2 - 9       | 912.5768  | 911.5695  | 911.4865  | 91.0  | 0 | M.AFGTLFTR. E                  |
| 24 - 36     | 1457.7449 | 1456.7376 | 1456.7409 | -2.24 | 0 | K.ANDIELNIVEAEK. G             |
| 24 - 45     | 2407.2345 | 2406.2272 | 2406.2390 | -4.90 | 1 | K.ANDIELNIVEAEKGNATVEHLK. A    |
| 136 - 146   | 1299.7508 | 1298.7435 | 1298.6983 | 34.8  | 0 | K.AFSVVEHLIR. N                |
| 147 - 154   | 935.5809  | 934.5736  | 934.4872  | 92.4  | 0 | R.NTFLVGER. I                  |
| 155 - 168   | 1430.8434 | 1429.8361 | 1429.8293 | 4.78  | 0 | R.ITLADLFAAGIAVR. G            |
| 169 - 176   | 1051.5449 | 1050.5376 | 1050.4811 | 53.8  | 0 | R.GPQYFFDK. Q                  |
| 188 - 193   | 837.5337  | 836.5264  | 836.4181  | 130   | 0 | R.WFETVR. A                    |
| 194 - 204   | 1202.6474 | 1201.6401 | 1201.6343 | 4.88  | 0 | R.AQPIFAEVAEK. V               |
| 194 - 219   | 2806.4489 | 2805.4416 | 2805.5164 | -26.6 | 1 | R.AQPIFAEVAEKVELLETALTNTPPK. K |
| 205 - 219   | 1622.8732 | 1621.8659 | 1621.8927 | -16.5 | 0 | K.VELLETALTNTPPK. K            |
| 234 - 254   | 1962.9287 | 1961.9214 | 1961.9694 | -24.4 | 1 | K.EEAAPAAEAAPASDEAPAAPE. A     |
| 257 - 267   | 1232.6378 | 1231.6305 | 1231.6785 | -39.0 | 0 | K.HPLEALGRPSR. Q               |
| 281 - 295   | 2088.0489 | 2087.0416 | 2086.9101 | 63.0  | 0 | K.YPMDFNFPREYSINK. V           |
| 296 - 299   | 524.3021  | 523.2948  | 523.2642  | 58.6  | 0 | K.VDYK. Y                      |
| 300 - 320   | 2447.1908 | 2446.1835 | 2446.1587 | 10.2  | 0 | K.YNEELTLTFMSNNLIGGFNNR. L     |
| 351 - 371   | 2465.1708 | 2464.1635 | 2464.0972 | 26.9  | 0 | R.GQEHVPAFDVAAPDWESYNFEK. L    |
| 372 - 380   | 1078.5562 | 1077.5489 | 1077.5203 | 26.6  | 0 | K.LDPTNPEHR. Q                 |

Spot No.: **33**

Mascot score: **132**

Species: *Fusarium oxysporum f. sp. cubense race 4*

Protein name: **1,3-beta-glucanosyltransferase gel4**

NCBI accession No.: **gi| 475668458**      Sequence coverage %: **44**

Matched peptides No.: **22**      Total peptides No.: **77**

Calculated Mr: **59159**      Calculated pI: **4.83**

### Annotated PMF spectra:

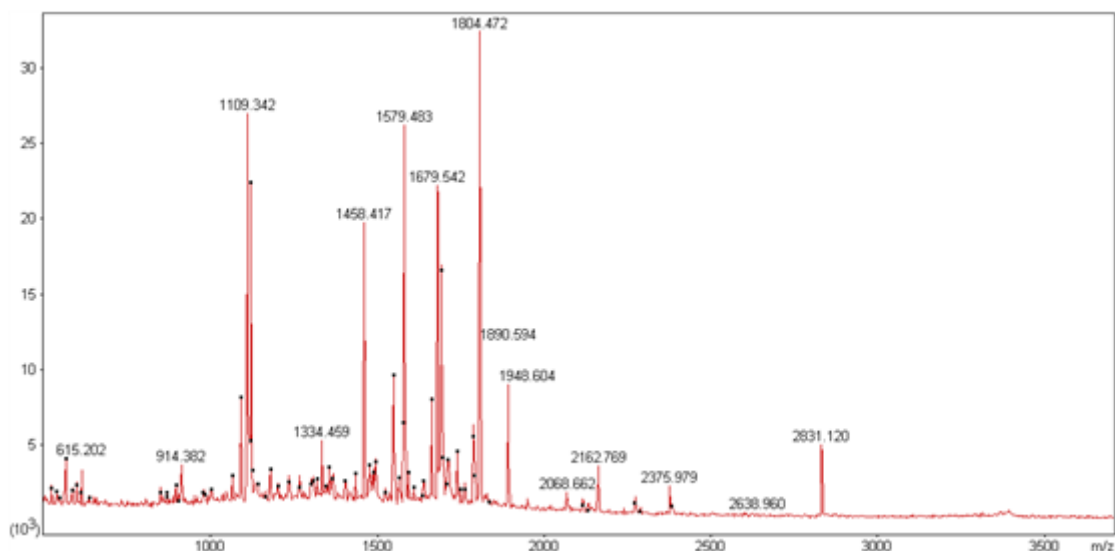

### Probability Based Mowse Score:

Protein score is  $-10 \cdot \log(P)$ , where P is the probability that the observed match is a random event. Protein scores greater than 75 are significant ( $p < 0.05$ ).

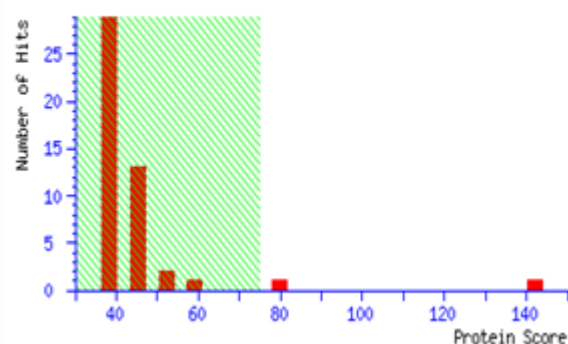

## Matched peptide sequences: shown in **Bold Red**

```

1  MKFSAAIVAA AATAASAKLE PITMKGSKLF YSNGTQFFMK GVAYQQDTAA
51 AGETNDKTTK YIDPLADEDA CKRDIPLLKQ LGTNIIRTYA INPKADHKAC
101 MKLLDDAGIY VISDLSEPSV SINRDDPKWD VELYERYIGV VDELGQYDNV
151 VGFFAGNEVS NNVSNTQASA FVKAAVRDTK KHIKSKFSRW LGVGYASNDD
201 VDIREQIADY FNCGDDDSRI DYWGYNIYSW CGKSSMQDSG YADQAKFFEN
251 YSVPVFFAEY GCNEPDGAAG RIFDETTALY EEKVMTDVFS GGIVMYMFQE
301 ANDYGLVKIS KNGDAVKQKD FAQLQKKANA AKPSGVEEDS YKPTGKAATC
351 PEQSKNWRAN SVLPPVPDSD LCDCMVKSRS CVPADNLKAK DFNDIFGYIC
401 GQDKICTAI NANATAGIYG AYSMCSNEAK LAYILDAYYT SQKSAADACD
451 FKGKATTQKA ESQDSCKSAL ASASKINEEV ATATHAVASS STGGSNSSSE
501 DDENFGLQAA SIARVFSLGD FAVGAYMAVA GVVGAGMVLL

```

## Matched peptides information:

| Start - End | Observed  | Mr (expt) | Mr (calc) | ppm   | M | Peptide                                                 |
|-------------|-----------|-----------|-----------|-------|---|---------------------------------------------------------|
| 1 - 18      | 1695.5374 | 1694.5301 | 1694.9025 | -220  | 1 | -.MKFSAAI <del>VAA</del> AAAAAASAK.L + Oxidation (0)    |
| 19 - 28     | 1119.3237 | 1118.3164 | 1118.6005 | -254  | 1 | K.LEPITMKR <del>SK</del> .L + Oxidation (0)             |
| 41 - 57     | 1738.5057 | 1737.4984 | 1737.7806 | -162  | 0 | K.GVAYQQDTAAAGETNDK.T                                   |
| 41 - 60     | 2068.6617 | 2067.6544 | 2067.9709 | -153  | 1 | K.GVAYQQDTAAAGETNDKTTK.Y                                |
| 80 - 87     | 914.3822  | 913.3749  | 913.5345  | -175  | 0 | K.QLGTHIIR.T                                            |
| 103 - 128   | 2831.1201 | 2830.1128 | 2830.4236 | -110  | 1 | K.LLDDAGIYVISDLSEPSVSINRDDPK.W                          |
| 125 - 136   | 1564.4549 | 1563.4476 | 1563.7205 | -175  | 1 | R.DDFSKDVELYER.Y                                        |
| 129 - 136   | 1109.3417 | 1108.3344 | 1108.5189 | -166  | 0 | K.WDVELYER.Y                                            |
| 190 - 204   | 1679.5417 | 1678.5344 | 1678.7951 | -155  | 0 | R.WLGVGYASNDVDIR.E                                      |
| 205 - 219   | 1804.4720 | 1803.4647 | 1803.7006 | -131  | 0 | R.EQIADYFNCGDDDSR.I                                     |
| 234 - 246   | 1403.3188 | 1402.3115 | 1402.5671 | -182  | 0 | K.SSMQDSGYADQAK.F + Oxidation (0)                       |
| 272 - 283   | 1458.4172 | 1457.4099 | 1457.6926 | -194  | 0 | R.IFDETTALYEEK.V                                        |
| 320 - 326   | 849.2443  | 848.2371  | 848.4392  | -238  | 0 | K.DFAQLQK.K                                             |
| 328 - 346   | 1948.6045 | 1947.5972 | 1947.9538 | -183  | 0 | K.ANAAKPSGVEEDSYKPTGK.A                                 |
| 359 - 377   | 2116.6857 | 2115.6784 | 2115.9639 | -135  | 0 | R.ANSVLPPV <del>PDSD</del> LCDCMVK.S                    |
| 359 - 377   | 2132.6592 | 2131.6519 | 2131.9588 | -144  | 0 | R.ANSVLPPV <del>PDSD</del> LCDCMVK.S + Oxidation (0)    |
| 359 - 379   | 2375.9786 | 2374.9713 | 2375.0920 | -50.8 | 1 | R.ANSVLPPV <del>PDSD</del> LCDCMVKSRS.S + Oxidation (0) |
| 380 - 388   | 1003.2703 | 1002.2630 | 1002.4804 | -217  | 0 | R.SCVPADNLK.A                                           |
| 389 - 404   | 1890.5942 | 1889.5869 | 1889.8618 | -145  | 1 | K.ARD <del>FND</del> IFGYICQDK.K                        |
| 391 - 404   | 1691.5386 | 1690.5313 | 1690.7297 | -117  | 0 | K.DFNDIFGYICQDK.K                                       |
| 431 - 443   | 1548.5062 | 1547.4989 | 1547.7871 | -186  | 0 | K.LAYILDAYTTSQK.S                                       |
| 444 - 452   | 984.2138  | 983.2065  | 983.4018  | -199  | 0 | K.SAADACDPK.G                                           |

Spot No.: **34**

Mascot score: **92**

Species: *Fusarium oxysporum f. sp. cubense race 4*

Protein name: **1,3-beta-glucanosyltransferase gel4**

NCBI accession No.: **gi| 475668458**      Sequence coverage %: **42**

Matched peptides No.: **19**      Total peptides No.: **79**

Calculated Mr: **59159**      Calculated pI: **4.83**

### Annotated PMF spectra:

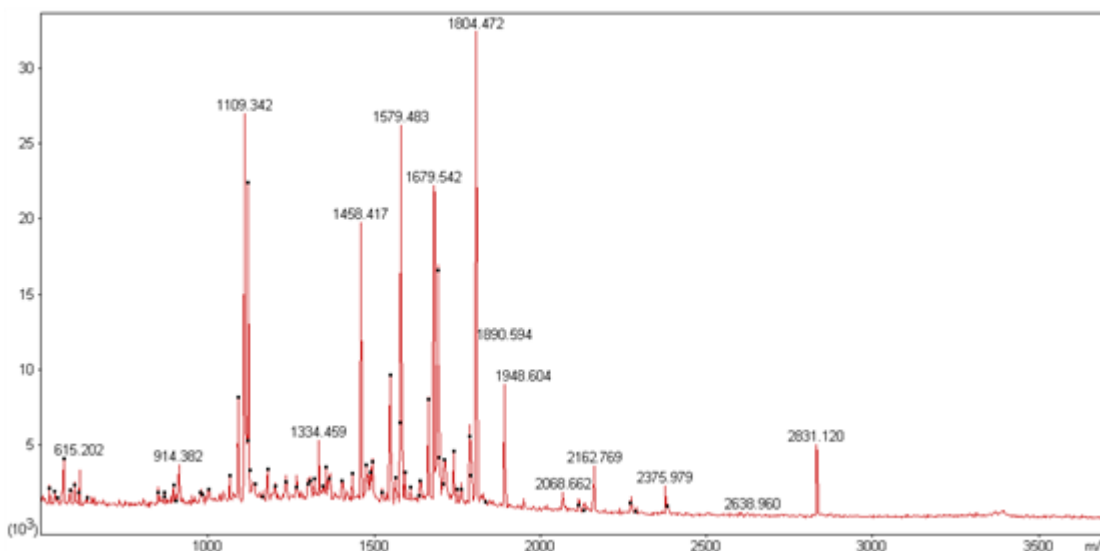

### Probability Based Mowse Score:

Protein score is  $-10 \cdot \log(P)$ , where P is the probability that the observed match is a random event. Protein scores greater than 75 are significant ( $p < 0.05$ ).

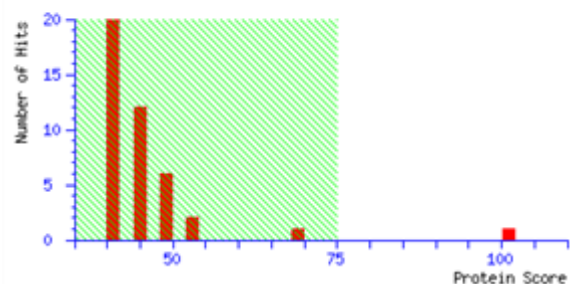

## Matched peptide sequences: shown in **Bold Red**

```

1  MKFSAAIVAA AATAASAKLE PITMKGSKLF YSNGTQFFMK GVAYQQDTAA
51 AGETNDKITK YIDPLADEDA CKRDIPLLKQ LGTNIIRTYA INPKADHKAC
101 MKLLDDAGIY VISDLSEPSV SINRDDPKWD VELYERYIGV VDELGQYDNV
151 VGFFAGNEVS NNVSNTQASA FVKAAVRDTK KHIKSKFSRW LGVGYASNDD
201 VDIREQIADY FNCGDDDSRI DYWGYNISW CGKSSMQDSG YADQAKFFEN
251 YSVPVFFAEY GCNEPDGAAG RIFDETTALY EEKVMTDVFS GGIVYMYFQE
301 ANDYGLVKIS KNGDAVKQKD FAQLQKKANA AKPSGVEEDS YKPTGKAATC
351 PEQSKNWRAN SVLPPVPSD LCDCMVKSRS CVPADNLKAK DFNDIFGYIC
401 GQDKKICTAI NANATAGIYG AYSMCSNEAK LAYILDAYT SQKSAADACD
451 FK GKATTQKA ESQDSCKSAL ASASKINEEV ATATHAVASS STGGSNSSSE
501 DDENFGLQAA SIARVFSLGD FAVGAYMAVA GVVGAGMVLL

```

## Matched peptides information:

| Start | End | Observed  | Mr(expt)  | Mr(calc)  | ppm   | M | Peptide                                                  |
|-------|-----|-----------|-----------|-----------|-------|---|----------------------------------------------------------|
| 19    | 28  | 1119.4431 | 1118.4358 | 1118.6005 | -147  | 1 | K.LEPITMKR <b>SK</b> .L + Oxidation (0)                  |
| 41    | 57  | 1738.5124 | 1737.5051 | 1737.7806 | -159  | 0 | K.GVAYQQDTAA <b>AGETNDK</b> .T                           |
| 74    | 87  | 1593.5119 | 1592.5046 | 1592.9613 | -287  | 1 | R.DIPL <b>LKQ</b> LOTN <b>IR</b> .T                      |
| 80    | 87  | 914.4343  | 913.4271  | 913.5345  | -118  | 0 | K.QLOTN <b>IR</b> .T                                     |
| 103   | 128 | 2831.3179 | 2830.3106 | 2830.4236 | -39.9 | 1 | K.LLDDAGIY <b>VISDLSEPSV</b> SIN <b>RDDPK</b> .W         |
| 129   | 136 | 1109.4175 | 1108.4102 | 1108.5189 | -98.0 | 0 | K.MDV <b>EL</b> YER.Y                                    |
| 190   | 204 | 1679.5730 | 1678.5657 | 1678.7951 | -137  | 0 | R.WLGVGYAS <b>NDD</b> VD <b>IR</b> .E                    |
| 205   | 219 | 1804.4916 | 1803.4843 | 1803.7006 | -120  | 0 | R.EQIADY <b>FNCGDDDSR</b> .I                             |
| 234   | 246 | 1403.3524 | 1402.3451 | 1402.5671 | -158  | 0 | K.S <b>SMQDSG</b> YAD <b>QAK</b> .P + Oxidation (0)      |
| 247   | 271 | 2843.1410 | 2842.1337 | 2842.2333 | -35.0 | 0 | K.FFENY <b>SVPVFFA</b> EYGCNEPDGAAG <b>R</b> .I          |
| 272   | 283 | 1458.4576 | 1457.4503 | 1457.6926 | -166  | 0 | R.I <b>FDETTAL</b> Y <b>EEK</b> .V                       |
| 320   | 326 | 849.3285  | 848.3212  | 848.4392  | -139  | 0 | K.D <b>FAQLQK</b> .K                                     |
| 328   | 346 | 1948.7043 | 1947.6970 | 1947.9538 | -132  | 0 | K.ANA <b>AKPSG</b> VEEDS <b>YKPTGK</b> .A                |
| 359   | 377 | 2116.7362 | 2115.7289 | 2115.9639 | -111  | 0 | R.ANSV <b>LPPVP</b> SD <b>LCDCMVK</b> .S                 |
| 359   | 377 | 2132.7105 | 2131.7032 | 2131.9588 | -120  | 0 | R.ANSV <b>LPPVP</b> SD <b>LCDCMVK</b> .S + Oxidation (0) |
| 359   | 379 | 2376.0800 | 2375.0727 | 2375.0920 | -8.10 | 1 | R.ANSV <b>LPPVP</b> SD <b>LCDCMVK</b> .S + Oxidation (0) |
| 389   | 404 | 1890.6650 | 1889.6577 | 1889.8618 | -108  | 1 | K.A <b>RD</b> FN <b>DIFG</b> YIC <b>QDK</b> .K           |
| 391   | 404 | 1691.5783 | 1690.5710 | 1690.7297 | -93.9 | 0 | K.D <b>FN</b> D <b>IFG</b> YIC <b>QDK</b> .K             |
| 431   | 443 | 1548.4861 | 1547.4788 | 1547.7871 | -199  | 0 | K.LAY <b>ILD</b> AY <b>TSQK</b> .S                       |

Spot No.: **35**

NCBI accession No.: **gi/477513214**

Plant species: ***Fusarium oxysporum f. sp. cubense race 1***

Protein name: **Beta-hexosaminidase subunit A1**

Mascot score: **93**                      Sequence coverage %: **4**

The number of matched peptides with  $p \leq 0.05$ : **1**

Calculated Mr: **34198**                      Calculated Pi: **6.25**

### Annotated MS spectra:

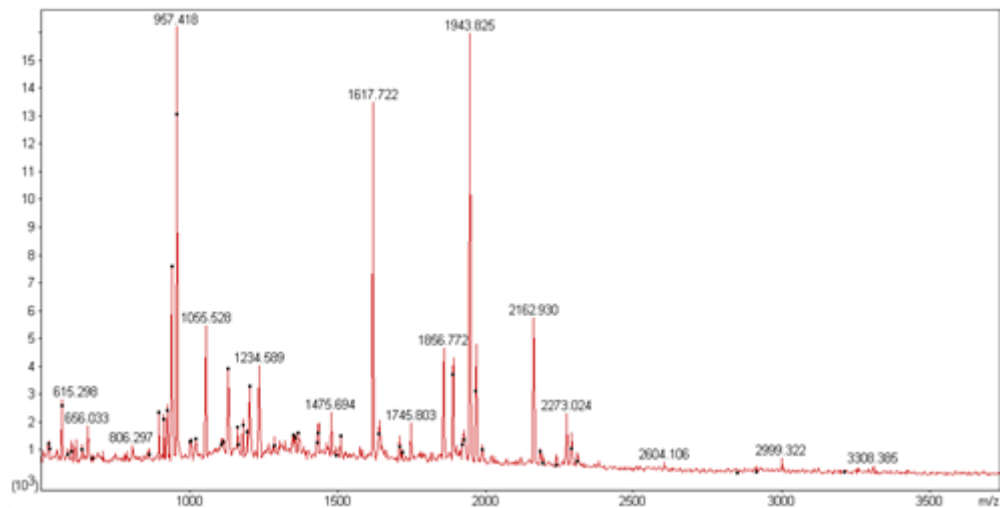

### Probability Based Mowse Score:

Ions score is  $-10 \cdot \log(P)$ , where P is the probability that the observed match is a random event. Individual ions scores  $> 48$  indicate identity or extensive homology ( $p < 0.05$ ). Protein scores are derived from ions scores as a non-probabilistic basis for ranking protein hits.

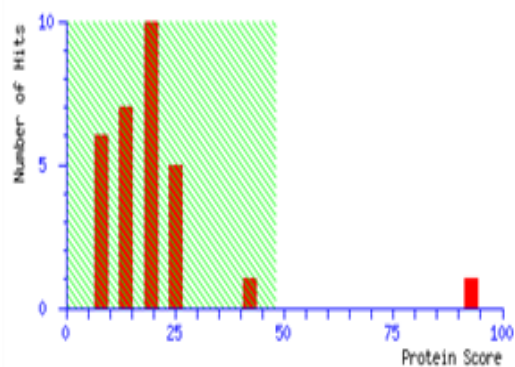

Matched peptide sequences: shown in **Bold Red**

```

1  MASNLYPHRG  FMLDTGRKFF  PVKAILHLLT  LLHQYNFNVF  HWHIYDAESF
51  PLLWPAGEGL  TNASVKYSQT  HTYYTPSDIQ  NVISYAENLG  ILVYPETDMP
101  GHSDIWGIWK  KDLVVGKASL  KKPDAQDIR  QNNKQVYDYI  RSLVSTVDGY
151  FGSPYHHFGG  DEVAYMWNTR  DDNKLFSFL  NWLKTLPKK  SVILWDDPLT
201  DSEKSITLSE  DWIIQTWHKG  TTQKILKKGH  RVIVSEDTF  YIGNADADKI
251  SSFVFPKSSK  VLGFEVAVFT  SQDDDPDLD  QDWIIDPLKA  ASKIRRK

```

### Matched peptides information:

| Query             | Start - End | Observed  | Nr(expt)  | Nr(calc)  | ppm   | H | Score | Expect  | Rank | U | Peptide           |
|-------------------|-------------|-----------|-----------|-----------|-------|---|-------|---------|------|---|-------------------|
| <a href="#">1</a> | 191 - 204   | 1617.7220 | 1616.7147 | 1616.7934 | -48.6 | 0 | 93    | 1.7e-06 | 1    | U | K.SVILWDDPLTSEK.S |

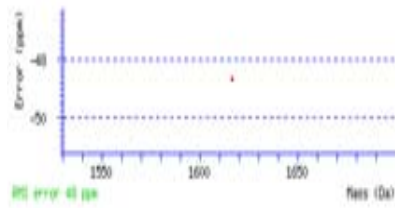

## Annotated ion spectra of the matched peptides with $p \leq 0.05$ :

CID No.: **35-1617.76**

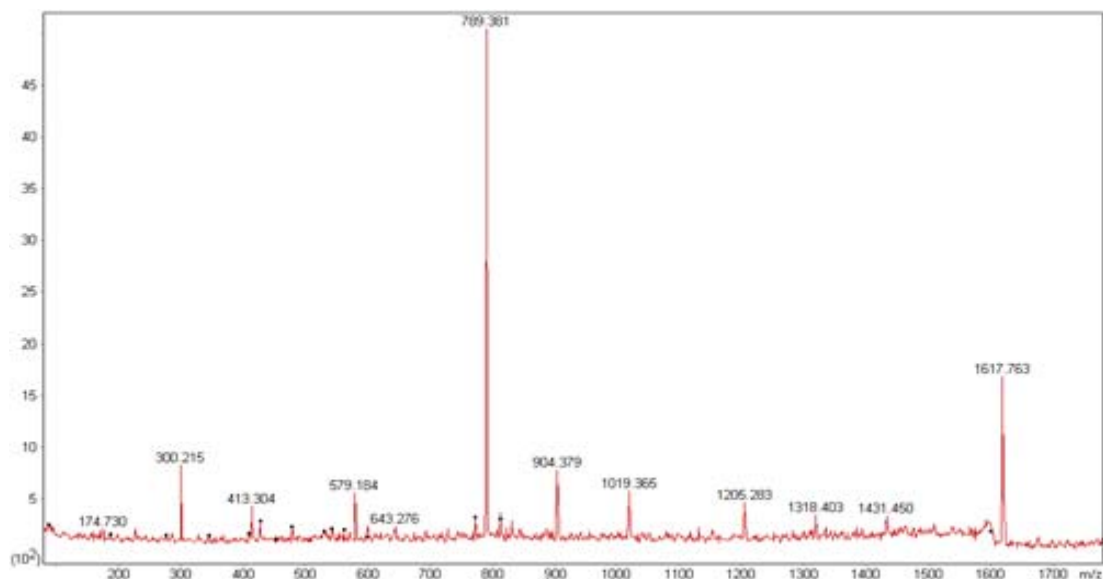

### MS/MS Fragmentation of **K.SVILWDDPLTDSEK.S**

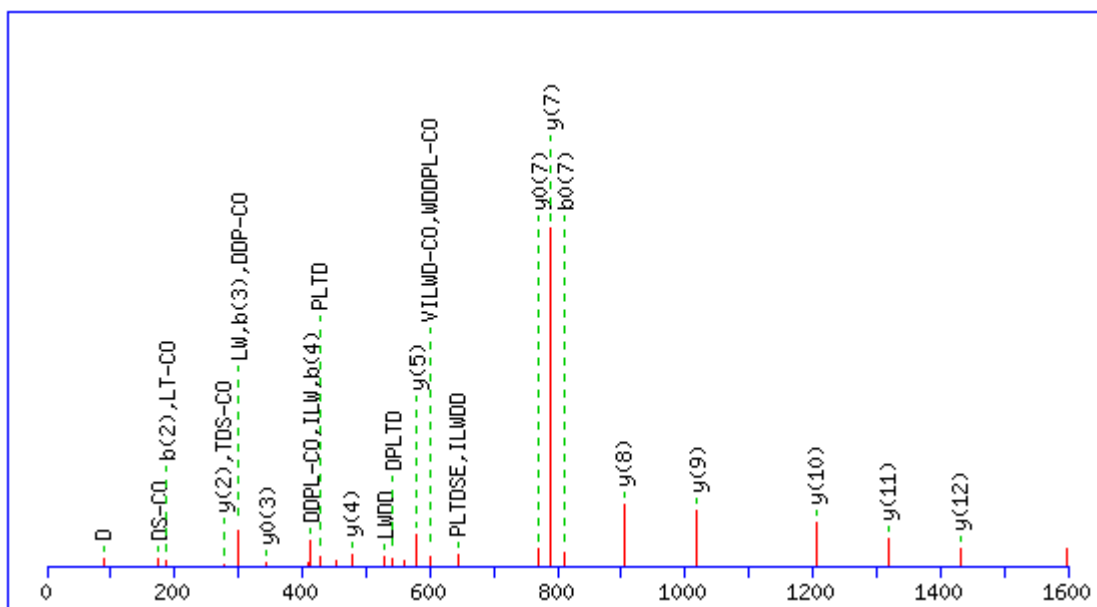

Monoisotopic mass of neutral peptide  $M_r(\text{calc})$ : 1616.7934

| #  | Immon.         | a         | a <sup>0</sup> | b               | b <sup>0</sup>  | d         | d'        | Seq. | v         | w         | w'        | y                | y <sup>+</sup> | y <sup>0</sup>  | #  |
|----|----------------|-----------|----------------|-----------------|-----------------|-----------|-----------|------|-----------|-----------|-----------|------------------|----------------|-----------------|----|
| 1  | 60.0444        | 60.0444   | 42.0338        | <b>88.0393</b>  | 70.0287         | 44.0495   |           | S    |           |           |           |                  |                |                 | 14 |
| 2  | 72.0808        | 159.1128  | 141.1022       | <b>187.1077</b> | 169.0972        | 145.0972  |           | V    | 1486.7060 | 1499.7264 |           | 1530.7686        | 1513.7421      | 1512.7581       | 13 |
| 3  | 86.0964        | 272.1969  | 254.1863       | <b>300.1918</b> | 282.1812        | 244.1656  | 258.1812  | I    | 1373.6220 | 1386.6424 | 1400.6580 | <b>1431.7002</b> | 1414.6737      | 1413.6896       | 12 |
| 4  | 86.0964        | 385.2809  | 367.2704       | <b>413.2758</b> | 395.2653        | 343.2340  |           | L    | 1260.5379 | 1259.5426 |           | <b>1318.6161</b> | 1301.5896      | 1300.6056       | 11 |
| 5  | 159.0917       | 571.3602  | 553.3497       | <b>599.3552</b> | 581.3446        |           |           | W    | 1074.4586 |           |           | <b>1205.5321</b> | 1188.5055      | 1187.5215       | 10 |
| 6  | <b>88.0393</b> | 686.3872  | 668.3766       | 714.3821        | 696.3715        | 642.3974  |           | D    | 959.4316  | 958.4364  |           | <b>1019.4528</b> | 1002.4262      | 1001.4422       | 9  |
| 7  | <b>88.0393</b> | 801.4141  | 783.4036       | 829.4090        | <b>811.3985</b> | 757.4243  |           | D    | 844.4047  | 843.4094  |           | <b>904.4258</b>  | 887.3993       | 886.4153        | 8  |
| 8  | 70.0651        | 898.4669  | 880.4563       | 926.4618        | 908.4512        | 872.4512  |           | P    | 747.3519  | 746.3567  |           | <b>789.3989</b>  | 772.3723       | <b>771.3883</b> | 7  |
| 9  | 86.0964        | 1011.5510 | 993.5404       | 1039.5459       | 1021.5353       | 969.5040  |           | L    | 634.2679  | 633.2726  |           | 692.3461         | 675.3196       | 674.3355        | 6  |
| 10 | 74.0600        | 1112.5986 | 1094.5881      | 1140.5936       | 1122.5830       | 1096.6037 | 1098.5830 | T    | 533.2202  | 546.2406  | 548.2198  | <b>579.2620</b>  | 562.2355       | 561.2515        | 5  |
| 11 | <b>88.0393</b> | 1227.6256 | 1209.6150      | 1255.6205       | 1237.6099       | 1183.6358 |           | D    | 418.1932  | 417.1980  |           | <b>478.2144</b>  | 461.1878       | 460.2038        | 4  |
| 12 | 60.0444        | 1314.6576 | 1296.6470      | 1342.6525       | 1324.6420       | 1298.6627 |           | S    | 331.1612  | 330.1660  |           | 363.1874         | 346.1609       | <b>345.1769</b> | 3  |
| 13 | 102.0550       | 1443.7002 | 1425.6896      | 1471.6951       | 1453.6846       | 1385.6947 |           | E    | 202.1186  | 201.1234  |           | <b>276.1554</b>  | 259.1288       | 258.1448        | 2  |
| 14 | 101.1073       |           |                |                 |                 |           |           | K    | 74.0237   | 73.0284   |           | 147.1128         | 130.0863       |                 | 1  |



| Seq           | ya       | yb       | Seq           | ya       | yb       | Seq           | ya       | yb       |
|---------------|----------|----------|---------------|----------|----------|---------------|----------|----------|
| <b>VI</b>     | 185.1648 | 213.1598 | <b>VIL</b>    | 298.2489 | 326.2438 | <b>VILW</b>   | 484.3282 | 512.3231 |
| <b>VILWD</b>  | 599.3552 | 627.3501 | <b>IL</b>     | 199.1805 | 227.1754 | <b>ILW</b>    | 385.2598 | 413.2547 |
| <b>ILWD</b>   | 500.2867 | 528.2817 | <b>ILWDD</b>  | 615.3137 | 643.3086 | <b>LW</b>     | 272.1757 | 300.1707 |
| <b>LWD</b>    | 387.2027 | 415.1976 | <b>LWDD</b>   | 502.2296 | 530.2245 | <b>LWDDP</b>  | 599.2824 | 627.2773 |
| <b>WD</b>     | 274.1186 | 302.1135 | <b>WDD</b>    | 389.1456 | 417.1405 | <b>WDDP</b>   | 486.1983 | 514.1932 |
| <b>WDDPL</b>  | 599.2824 | 627.2773 | <b>DD</b>     | 203.0662 | 231.0612 | <b>DDP</b>    | 300.1190 | 328.1139 |
| <b>DDPL</b>   | 413.2031 | 441.1980 | <b>DDPLT</b>  | 514.2508 | 542.2457 | <b>DDPLTD</b> | 629.2777 | 657.2726 |
| <b>DP</b>     | 185.0921 | 213.0870 | <b>DPL</b>    | 298.1761 | 326.1710 | <b>DPLT</b>   | 399.2238 | 427.2187 |
| <b>DPLTD</b>  | 514.2508 | 542.2457 | <b>DPLTDS</b> | 601.2828 | 629.2777 | <b>PL</b>     | 183.1492 | 211.1441 |
| <b>PLT</b>    | 284.1969 | 312.1918 | <b>PLTD</b>   | 399.2238 | 427.2187 | <b>PLTDS</b>  | 486.2558 | 514.2508 |
| <b>PLTDSE</b> | 615.2984 | 643.2933 | <b>LT</b>     | 187.1441 | 215.1390 | <b>LTD</b>    | 302.1710 | 330.1660 |
| <b>LTDS</b>   | 389.2031 | 417.1980 | <b>LTDSE</b>  | 518.2457 | 546.2406 | <b>TD</b>     | 189.0870 | 217.0819 |
| <b>TDS</b>    | 276.1190 | 304.1139 | <b>TDSE</b>   | 405.1616 | 433.1565 | <b>DS</b>     | 175.0713 | 203.0662 |
| <b>DSE</b>    | 304.1139 | 332.1088 | <b>SE</b>     | 189.0870 | 217.0819 |               |          |          |

Spot No.: **36**

Mascot score: **162**

Species: *Fusarium oxysporum f. sp. cubense race 4*

Protein name: **phosphoglycerate kinase**

NCBI accession No.: **gi| 475667960**      Sequence coverage %: **55**

Matched peptides No.: **20**      Total peptides No.: **56**

Calculated Mr: **44835**      Calculated pI: **5.77**

### Annotated PMF spectra:

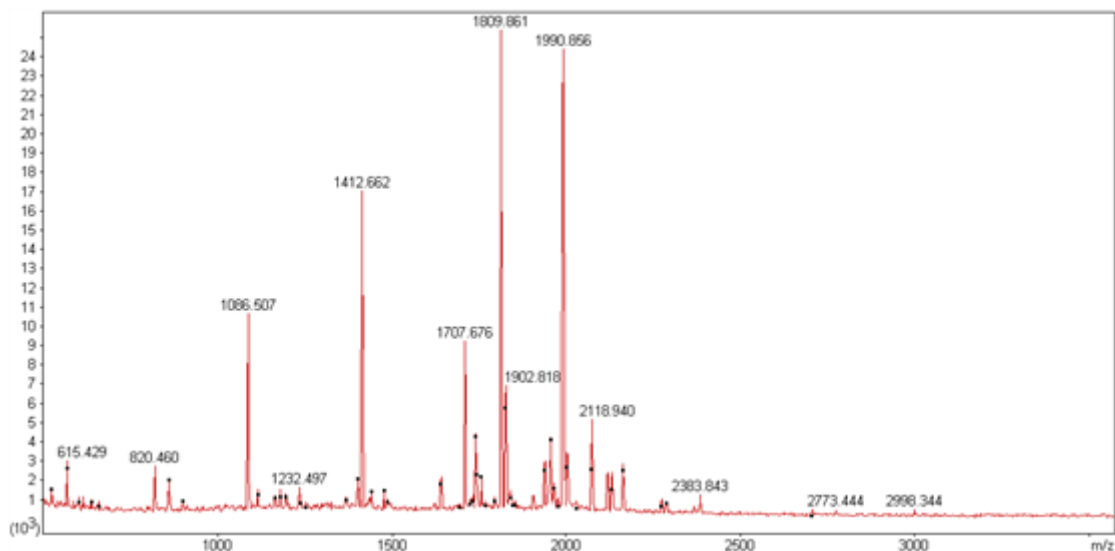

### Probability Based Mowse Score:

Protein score is  $-10 \cdot \log(P)$ , where P is the probability that the observed match is a random event. Protein scores greater than 75 are significant ( $p < 0.05$ ).

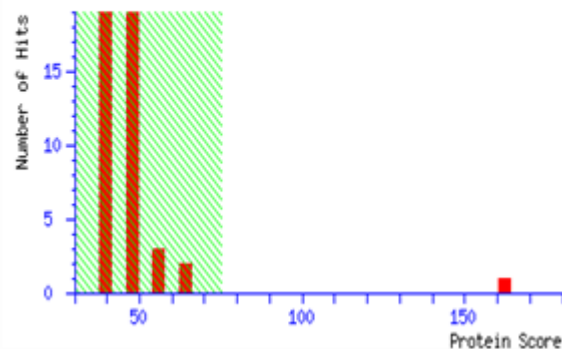

## Matched peptide sequences: shown in **Bold Red**

```

1  MSLSNKLSIT DVDVKGKRVL IRVDFNVPLD ADKNITNNQR IVGALPTIKY
51 ALENGAKSVI LMSHLGRPNG SPNEKYSLKP VVPELEKLLG KKVTFAPDCV
101 GPEVEEIVNK AEDGAVILLE NLRFHIEEEG SSKDKEGNKT KADKAQVEAF
151 RKGLTALGDV YINDAFGTAH RAHSSMVGVD LPQKASGFLV KKELEYFAKA
201 LEEPQRPFLA ILGGAKVSDK IQLIDNLLDK VNTLIICGGM AFTFKKTLEG
251 VSIGNSLFDE AGSKTVGNLV EKAKAKGVKL VLPVDYITAD KFDKDANTGY
301 ATDKDGIPDG WQGLDCGEES VKLYKEAIAE AKTILWNGPA GVFEFEK FAS
351 GTKATLDAVV DAVQKDGKIV IIGGGDTATV AKKYGVEDKL SHVSTGGGAS
401 LELLEGKELP GVTALSSK

```

## Matched peptides information:

| Start - End | Observed  | Mr (expt) | Mr (calc) | ppm   | M | Peptide                          |
|-------------|-----------|-----------|-----------|-------|---|----------------------------------|
| 23 - 33     | 1232.4972 | 1231.4899 | 1231.6085 | -96.3 | 0 | R.VDFNVPLDADK.N                  |
| 23 - 40     | 2072.8758 | 2071.8685 | 2072.0287 | -77.3 | 1 | R.VDFNVPLDADGNITNNQR.I           |
| 34 - 40     | 859.4474  | 858.4401  | 858.4308  | 10.9  | 0 | K.NITNNQR.I                      |
| 76 - 87     | 1401.6441 | 1400.6368 | 1400.7915 | -110  | 0 | K.YSLKPVVFELEK.L                 |
| 92 - 110    | 2130.9019 | 2129.8946 | 2130.0667 | -80.8 | 1 | K.KVTFAPDCVQPEVEEIVNK.A          |
| 93 - 110    | 2002.8168 | 2001.8095 | 2001.9718 | -81.0 | 0 | K.VTFAPDCVQPEVEEIVNK.A           |
| 111 - 123   | 1412.6620 | 1411.6547 | 1411.7671 | -79.6 | 0 | K.AEDGAVILLENLR.F                |
| 124 - 133   | 1162.4208 | 1161.4135 | 1161.5302 | -100  | 0 | R.FHIEEISSK.D                    |
| 145 - 151   | 820.4603  | 819.4530  | 819.4239  | 35.5  | 0 | K.AQVEAFR.K                      |
| 152 - 171   | 2118.9398 | 2117.9325 | 2118.0858 | -72.4 | 1 | R.RKGLTALGDVYINDAFGTAHR.A        |
| 153 - 171   | 1990.8559 | 1989.8486 | 1989.9908 | -71.5 | 0 | K.GLTALGDVYINDAFGTAHR.A          |
| 172 - 184   | 1368.5882 | 1367.5809 | 1367.6867 | -77.4 | 0 | R.AHSSMVGVDLPQK.A                |
| 193 - 199   | 899.4319  | 898.4247  | 898.4436  | -21.1 | 0 | K.ELEYFAK.A                      |
| 200 - 216   | 1809.8613 | 1808.8540 | 1809.0148 | -88.9 | 0 | K.ALEEPQRPFLAIILOGAK.V           |
| 247 - 264   | 1823.7140 | 1822.7067 | 1822.8949 | -103  | 0 | K.TLEOVSIGNSLFDEAGSK.T           |
| 280 - 294   | 1736.7426 | 1735.7353 | 1735.9396 | -118  | 1 | K.LVLPVDYITADKFDK.D              |
| 295 - 322   | 2998.3440 | 2997.3367 | 2997.2934 | 14.4  | 1 | K.DANTGYATREDGIPDQWQGLDCGEESVK.L |
| 305 - 322   | 1961.6835 | 1960.6762 | 1960.8473 | -87.2 | 0 | K.DGIPDQWQGLDCGEESVK.L           |
| 333 - 347   | 1707.6761 | 1706.6688 | 1706.8668 | -116  | 0 | K.TILWNGPAGVFEFEK.F              |
| 390 - 407   | 1754.7335 | 1753.7262 | 1753.9210 | -111  | 0 | K.LSHVSTGGGASLELLEGK.E           |

Spot No.: **37**

Mascot score: **191**

Species: *Fusarium oxysporum Fo5176*

Protein name: **adenosylhomocysteinase**

NCBI accession No.: **gi| 342873590**      Sequence coverage %: **57**

Matched peptides No.: **29**      Total peptides No.: **85**

Calculated Mr: **49506**      Calculated pI: **5.57**

### Annotated PMF spectra:

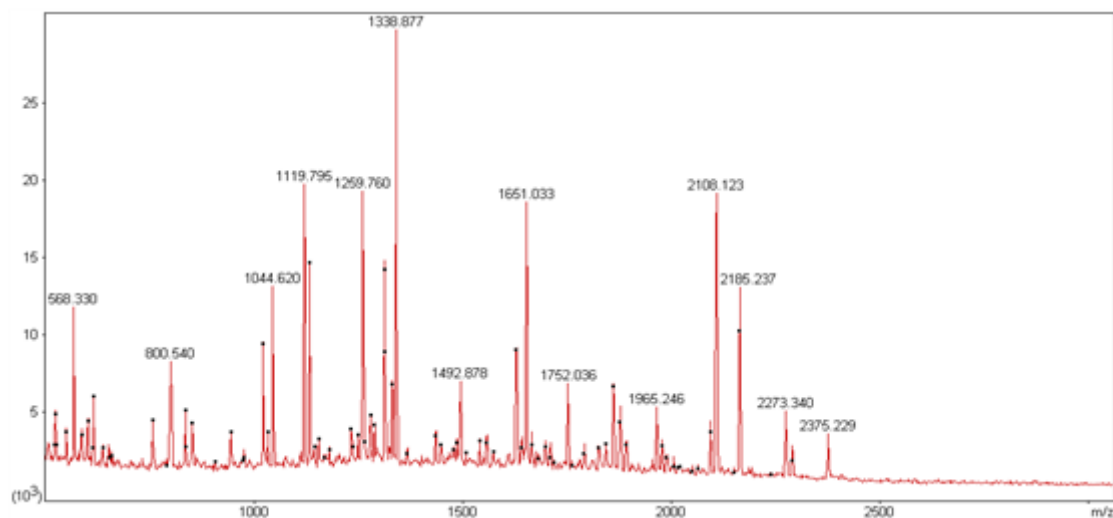

### Probability Based Mowse Score:

Protein score is  $-10 \cdot \log(P)$ , where P is the probability that the observed match is a random event. Protein scores greater than 75 are significant ( $p < 0.05$ ).

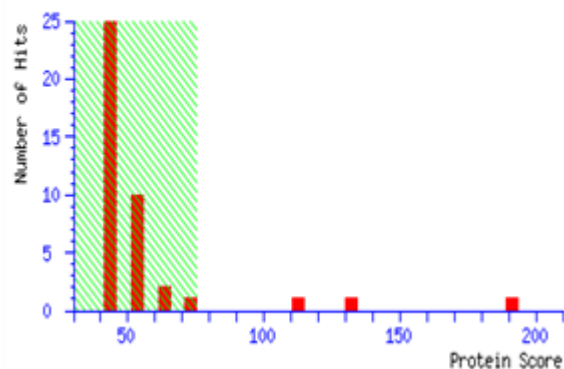

## Matched peptide sequences: shown in **Bold Red**

```

1  MSAPAHKFKV ADLSLAAFGR KEIELAENEM PGLMQTRAKY AADQPLAGAR
51 IAGCLHMTIQ TAVLIETLTA LGAEVTWISC NIFSTQDHAA AAIAAAAGVPV
101 FAWKGETEEE YNWCLEQQLT AFKDNKLN ILDDGGDLTT LVHQKYPEML
151 KDCFGVSEET TTGVHHLIRM LKDGKLLVPA INVNSVTKS KFDNLYGCRE
201 SLVDGIKRAT DVMIAGKVAV VAGFGDVGKG CAMALHGMGA RVLVTEIDPI
251 NALQAAMAGY QVTTMEKAAK VGQIFVTTTG CRDILTGEHF EAMPNDAIVC
301 NIGHFDIEID VAWLKANASS VQNIKPQVDR FLMPNGRHII LLAEGRLVNL
351 GCATGHSSFV MSCSFTNQVL AQIMLYKAAD KAWGEKYVEF AKTDKLDVGV
401 YVLPKILDEE VARLHLDHCQ AELSTLSKVQ AEYLGLTVEG PFKADIYRY

```

## Matched peptides information:

| Start | End | Observed  | He (length) | He (aa16) | ppm  | H | Peptide                                  |
|-------|-----|-----------|-------------|-----------|------|---|------------------------------------------|
| 10    | 20  | 1119.7945 | 1119.7972   | 1119.6084 | 160  | 0 | K.VADLSLAAFGR.E                          |
| 10    | 21  | 1247.7431 | 1246.7358   | 1246.7034 | 26.0 | 1 | K.VADLSLAAFGR.E                          |
| 21    | 37  | 1989.1922 | 1988.1749   | 1987.9706 | 103  | 1 | R.KEIELAENEMPOLMQTR.A                    |
| 22    | 37  | 1841.0623 | 1860.0500   | 1859.8707 | 96.4 | 0 | K.EIELAENEMPOLMQTR.A                     |
| 22    | 37  | 1877.0492 | 1876.0419   | 1875.8706 | 91.3 | 0 | K.EIELAENEMPOLMQTR.A + Oxidation: O0     |
| 22    | 37  | 1893.0562 | 1892.0489   | 1891.8655 | 96.9 | 0 | K.EIELAENEMPOLMQTR.A + 2 Oxidation: O0   |
| 40    | 50  | 1132.7308 | 1131.7310   | 1131.5672 | 149  | 0 | K.YAADQPLAGAR.I                          |
| 105   | 123 | 2375.2295 | 2374.2217   | 2374.0429 | 75.6 | 0 | K.GETEKEYRGLDQLTAFK.D                    |
| 127   | 145 | 2093.3184 | 2092.3113   | 2092.1528 | 75.8 | 1 | K.LHLLLEDDGDLTTLVNQR.Y                   |
| 128   | 145 | 1945.2455 | 1964.2382   | 1964.0579 | 91.8 | 0 | K.LHLLLEDDGDLTTLVNQR.Y                   |
| 152   | 169 | 2106.1231 | 2107.1158   | 2106.9429 | 82.1 | 0 | K.DCFVSEETTTQFWLYR.H                     |
| 176   | 189 | 1482.9758 | 1481.9685   | 1481.8453 | 83.1 | 0 | K.LLVFALHFDVSTYK.E                       |
| 190   | 199 | 1259.7601 | 1258.7528   | 1258.5764 | 140  | 1 | K.SKEFWLYGR.E                            |
| 192   | 199 | 1044.8200 | 1043.8127   | 1043.4495 | 156  | 0 | K.FEHWLYGR.E                             |
| 209   | 229 | 2004.1455 | 2004.1382   | 2004.0714 | 33.3 | 1 | R.ATDVFHAGRYVAVAGFDVGR.D                 |
| 209   | 229 | 2021.0990 | 2020.0917   | 2020.0663 | 52.6 | 1 | R.ATDVFHAGRYVAVAGFDVGR.D + Oxidation: O0 |
| 230   | 241 | 1231.7455 | 1230.7382   | 1230.5420 | 159  | 0 | K.GCAMALHGMGAR.Y                         |
| 230   | 241 | 1263.7688 | 1262.7615   | 1262.5318 | 162  | 0 | K.GCAMALHGMGAR.Y + 2 Oxidation: O0       |
| 271   | 282 | 1338.8774 | 1337.8701   | 1337.6762 | 143  | 0 | K.VGQIFVTTTGR.D                          |
| 316   | 330 | 1627.0193 | 1626.0120   | 1625.8485 | 101  | 0 | K.AKASVYQIKKQVDR.F                       |
| 331   | 337 | 834.5812  | 833.5740    | 833.4218  | 183  | 0 | R.FLDSWGR.H                              |
| 338   | 346 | 1021.7539 | 1020.7466   | 1020.6080 | 136  | 0 | R.HILLAEGR.L                             |
| 387   | 392 | 756.5288  | 755.5214    | 755.3854  | 180  | 0 | K.VYSEAK.T                               |
| 393   | 405 | 1446.9360 | 1445.9287   | 1445.8130 | 80.0 | 1 | K.TEKLVVYVYVYVYVPE.I                     |
| 406   | 413 | 844.6771  | 843.6698    | 843.4974  | 183  | 0 | K.LDEEYAR.L                              |
| 414   | 428 | 1752.0363 | 1751.0290   | 1750.8672 | 92.4 | 0 | R.LHLLHCGAEIETLSEK.Y                     |
| 429   | 443 | 1651.0328 | 1650.0255   | 1649.8665 | 96.4 | 0 | K.VGAEYLGTLVEGDFK.A                      |
| 444   | 448 | 837.4961  | 836.4888    | 836.3231  | 260  | 0 | K.ADIYR.Y                                |
| 444   | 448 | 800.5403  | 799.5331    | 799.3864  | 183  | 1 | K.ADIYR.Y                                |

Spot No.: **38**

Mascot score: **206**

Species: *Fusarium oxysporum f. sp. cubense race 4*

Protein name: **ATP synthase subunit beta, mitochondrial**

NCBI accession No.: **gi| 475664589**      Sequence coverage %: **71**

Matched peptides No.: **30**      Total peptides No.: **68**

Calculated Mr: **55197**      Calculated pI: **5.27**

### Annotated PMF spectra:

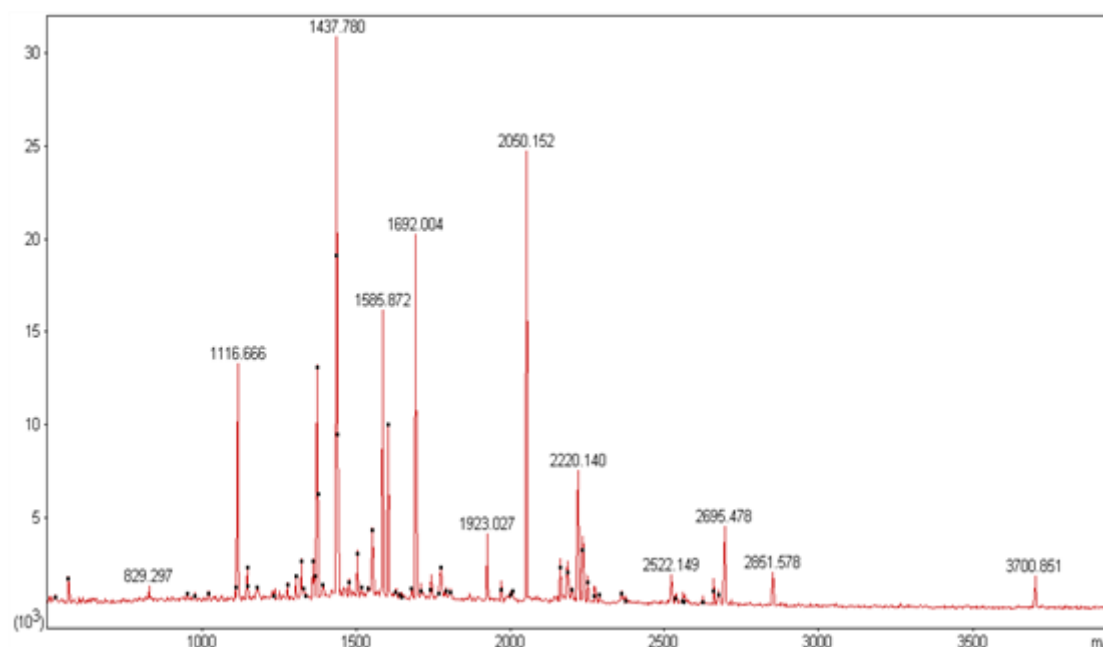

### Probability Based Mowse Score:

Protein score is  $-10 \cdot \log(P)$ , where P is the probability that the observed match is a random event. Protein scores greater than 75 are significant ( $p < 0.05$ ).

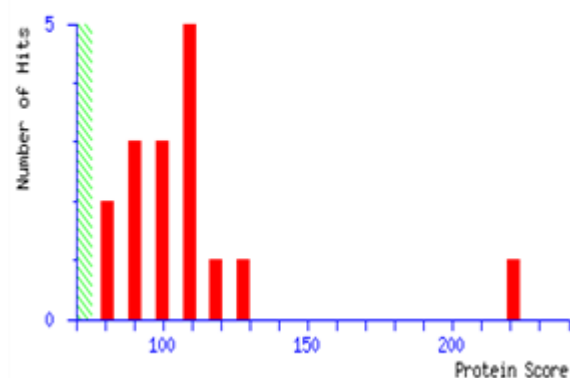

## Matched peptide sequences: shown in **Bold Red**

1 MFKSGISSFA RAARPAVLPR RALRPSSLRL PISSRWASTA SVGTGKIHQV  
 51 IGAVVDVKFD TQKLPAILNS **LETENNGQKL** VLEVSQHLGE NVVRCIAMDG  
 101 **TEGLVRGASA** QDTGAPITIP VGPATLGRIM NVTGDPIDER GPIKTDKRLP  
 151 **IHTEAPEFVE** QSTSAEVLVT GIKVVDLLAP YARGGKIGLF GGAGVVGKTVF  
 201 **IQELINNIK** AHGGYSVFTG VGERREGND LYHEMQETSV IQLDGESKVA  
 251 **LVFGQMNEPP** GARARVALTG LTVAEYFRDE EGQDVLLFID NIFRFTQAGS  
 301 **EVSALLGRIP** SAVGYQPTLA VDMGGMQERI TTTTKGSITS VQAVYVPADD  
 351 **LTDPAPATTF** AHLDATTVLS RGISELGIYP AVDPLDSKSR MLDPRVVGQE  
 401 **HYDVATRVOQ** ILQEYKSLQD IIAILGMDEL SEADKLTVER ARKIQRFLSQ  
 451 **PFTVAQVFTG** IEGKLVDLKE TINSFKAILN GEGDNLPEGA FYMVGDFASA  
 501 KAKGEKILAE LEGQ

## Matched peptides information:

| Start | End | Observed  | Ms (expt) | Ms (calc) | ppm   | M | Peptide                                    |
|-------|-----|-----------|-----------|-----------|-------|---|--------------------------------------------|
| 47    | 58  | 1277.7650 | 1276.7577 | 1276.7503 | 5.79  | 0 | K.IHQVIGAVVDK.F                            |
| 64    | 73  | 1740.9232 | 1739.9179 | 1739.9053 | 7.24  | 0 | K.LPALIWSLETENNGQK.L                       |
| 80    | 94  | 1692.0044 | 1690.9971 | 1690.9366 | 35.0  | 0 | K.VLEVSQHLGEVYR.C                          |
| 95    | 106 | 1321.6979 | 1320.6906 | 1320.6166 | 56.0  | 0 | K.CIANDQTEGLVR.G                           |
| 95    | 106 | 1327.6690 | 1326.6617 | 1326.6119 | 37.6  | 0 | K.CIANDQTEGLVR.G + Oxidation: O0           |
| 107   | 128 | 2050.1518 | 2049.1445 | 2049.0855 | 28.0  | 0 | K.QAAGDTGAPITIPQATLGR.I                    |
| 122   | 140 | 1359.7078 | 1358.7005 | 1358.6500 | 37.2  | 0 | K.IINVTGDPIDER.G                           |
| 122   | 140 | 1375.6401 | 1374.6328 | 1374.6449 | -9.81 | 0 | K.IINVTGDPIDER.G + Oxidation: O0           |
| 148   | 173 | 2851.5783 | 2850.5710 | 2850.5127 | 20.5  | 1 | K.NLPIHTEAPEFVEQSTSAEVLVTOEK.Y             |
| 149   | 173 | 2695.4774 | 2694.4703 | 2694.4116 | 21.8  | 0 | K.LPIHTEAPEFVEQSTSAEVLVTOEK.Y              |
| 174   | 183 | 1116.6661 | 1115.6588 | 1115.6339 | 22.4  | 0 | K.VVDLLAPYAR.G                             |
| 187   | 197 | 975.5551  | 974.5478  | 974.5849  | -7.34 | 0 | K.IQLDGGAGVQK.T                            |
| 198   | 210 | 1502.8882 | 1501.8789 | 1501.8504 | 19.0  | 0 | K.VYVIGELINNIK.A                           |
| 227   | 248 | 2522.1491 | 2521.1418 | 2521.1279 | 5.55  | 0 | K.EGDLVYKIGETSTVQLDGESEK.Y                 |
| 227   | 248 | 2538.1485 | 2537.1382 | 2537.1228 | 6.10  | 0 | K.EGDLVYKIGETSTVQLDGESEK.Y + Oxidation: O0 |
| 249   | 263 | 1585.8717 | 1584.8644 | 1584.8082 | 35.4  | 0 | K.VALTVOQSEPPGAR.A                         |
| 249   | 263 | 1601.8439 | 1600.8366 | 1600.8032 | 20.9  | 0 | K.VALTVOQSEPPGAR.A + Oxidation: O0         |
| 266   | 278 | 1439.0688 | 1438.0615 | 1438.7820 | 55.3  | 0 | K.VALTTLVAEYR.D                            |
| 279   | 294 | 1923.0271 | 1922.0198 | 1921.9422 | 40.4  | 0 | K.DEEQETPLFIDHIFR.F                        |
| 295   | 308 | 1435.7754 | 1434.7681 | 1434.7467 | 14.9  | 0 | K.YTQAGSEYSALGR.I                          |
| 309   | 329 | 2220.1398 | 2219.1323 | 2219.0719 | 27.4  | 0 | K.IPSAVYQPTLAVDNGQDER.I                    |
| 309   | 329 | 2236.1207 | 2235.1134 | 2235.0664 | 21.0  | 0 | K.IPSAVYQPTLAVDNGQDER.I + Oxidation: O0    |
| 309   | 329 | 2252.1076 | 2251.1003 | 2251.0613 | 17.3  | 0 | K.IPSAVYQPTLAVDNGQDER.I + 2 Oxidation: O0  |
| 336   | 371 | 3700.8507 | 3699.8434 | 3699.8632 | -5.35 | 0 | K.GSTTSVQAVYVPADDLTPAPATTFANLDATTVLSR.G    |
| 372   | 388 | 1773.9372 | 1772.9299 | 1772.9198 | 5.81  | 0 | K.GISELGIYPATVPLDSE.S                      |
| 394   | 407 | 1373.7253 | 1372.7180 | 1372.6735 | 32.4  | 0 | K.VVQGHYDVATR.Y                            |
| 408   | 414 | 1148.6559 | 1147.6486 | 1147.6237 | 21.7  | 0 | K.VQGITLQRYK.S                             |
| 417   | 440 | 2659.4430 | 2658.4357 | 2658.3786 | 21.5  | 1 | K.SLQDIIALQDSESEADKLTVER.A                 |
| 417   | 440 | 2675.4041 | 2674.3968 | 2674.3735 | 9.73  | 1 | K.SLQDIIALQDSESEADKLTVER.A + Oxidation: O0 |
| 447   | 464 | 1949.0687 | 1948.0614 | 1948.0357 | 13.1  | 0 | K.FLSQPTVAQVHTVTOEK.L                      |

Spot No.: **39**

Mascot score: **90**

Species: *Fusarium oxysporum f. sp. cubense race 1*

Protein name: **I-amino acid oxidase**

NCBI accession No.: **gi| 477517233**      Sequence coverage %: **24**

Matched peptides No.: **17**      Total peptides No.: **46**

Calculated Mr: **67814**      Calculated pI: **5.69**

### Annotated PMF spectra:

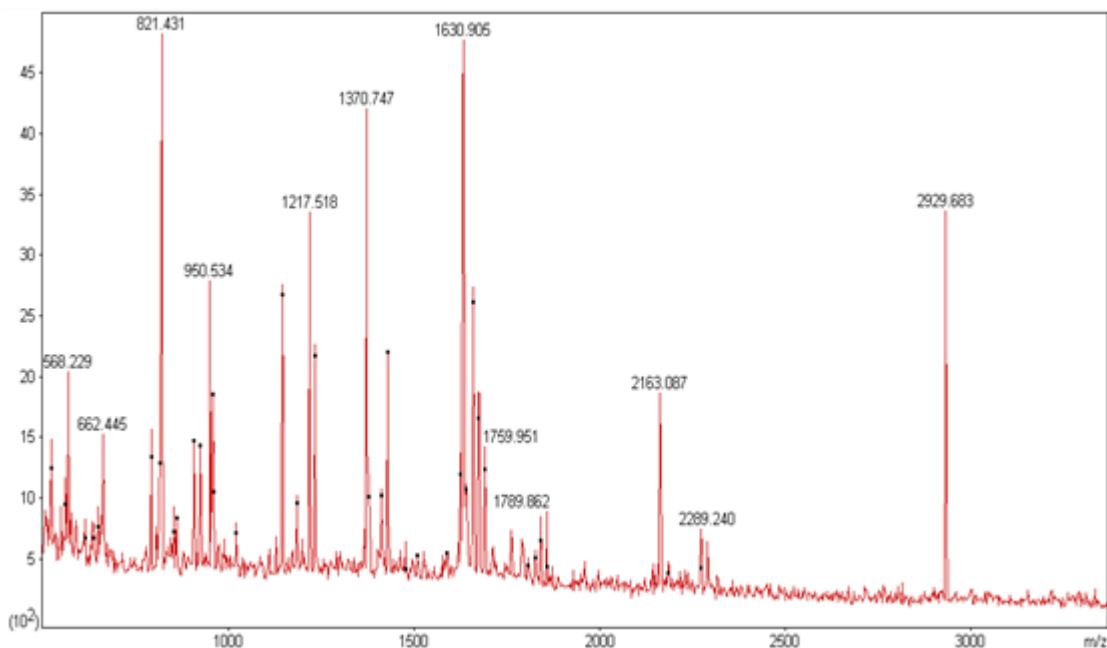

### Probability Based Mowse Score:

Protein score is  $-10 \cdot \log(P)$ , where P is the probability that the observed match is a random event. Protein scores greater than 75 are significant ( $p < 0.05$ ).

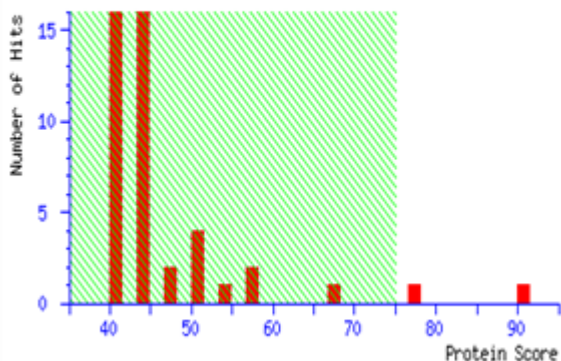



Matched peptide sequences: shown in **Bold Red**

```

1  MVKFTDEFPWG ASVLVLLFSL NAHGTKLPLK AQQTHLCADK PQMQNFDSVG
51  AWFDDVAKLN  CTSVSKAPNA SIAIVGGGVS GLTTALMLDS IGLHNWDIIE
101 ASDRVGGRFR  TKFVGGTKEF AEMGPMRLPY TVTYKSDNST YEYTEHRLTF
151 QLAETLNEMN  GNSDKWKVDF ISWIQHHPNE LIAWGTGRHP DGRIPTADI
201 HANSSLGKPP  AIVSTEYNET KHRMNEILKN ETMLKAIQAD VWRSHKFVMS
251 QGYDDWSEQC  MMREAFHASE NITDAIWTAT DYDVVWDEM V HNSNLALDGT
301 KDSLGETEWK  CVDGGFNRLT DAFIPHVSDR LVLNRKIGKL ESVKGEDGQT
351 QIRLSWYPSV  KNRTFESKDY DYTIMAVPFT MTRFMALPSF SSVLGRAISE
401 AGLRFKSACK VSLLFSEFRW EKGERPIFGG YSIPESRPIG ALYYPVYGLN
451 ESRPGLITHY  RGGDWSDRYV SFSDEEHVQT VLDAIVSLHG EQARELYTGD
501 YERLCWLQDE HTATSWCRPD VEQHNLIPA YHQTEHNTIF IGEHTAPTQA
551 WISSAIYSAA  RGTIQLLLEL GMVEEAKEIN RRWMGRWIRD ETKP

```

Matched peptides information:

| Start | End | Observed  | Mr(expt)  | Mr(calc)  | ppm   | M | Peptide                               |
|-------|-----|-----------|-----------|-----------|-------|---|---------------------------------------|
| 113   | 127 | 1656.7831 | 1655.7758 | 1655.7800 | -2.51 | 1 | K.FVGGTKEFAEMGPMR.L                   |
| 113   | 127 | 1672.7587 | 1671.7514 | 1671.7749 | -14.0 | 1 | K.FVGGTKEFAEMGPMR.L + Oxidation (0)   |
| 113   | 127 | 1688.7613 | 1687.7540 | 1687.7698 | -9.36 | 1 | K.FVGGTKEFAEMGPMR.L + 2 Oxidation (0) |
| 236   | 243 | 958.5090  | 957.5017  | 957.5032  | -1.56 | 0 | K.AIQADVWR.S                          |
| 311   | 318 | 924.3931  | 923.3858  | 923.3920  | -6.63 | 0 | K.CVDGGFMR.L                          |
| 319   | 330 | 1370.7465 | 1369.7392 | 1369.6990 | 29.4  | 0 | R.LYDAFIPHVSDR.L                      |
| 369   | 383 | 1823.9360 | 1822.9287 | 1822.8270 | 55.8  | 0 | K.DYDITIMAVPFTMTR.F                   |
| 369   | 383 | 1839.8647 | 1838.8574 | 1838.8219 | 19.3  | 0 | K.DYDITIMAVPFTMTR.F + Oxidation (0)   |
| 369   | 383 | 1855.9075 | 1854.9002 | 1854.8168 | 45.0  | 0 | K.DYDITIMAVPFTMTR.F + 2 Oxidation (0) |
| 384   | 396 | 1411.7492 | 1410.7419 | 1410.7330 | 6.36  | 0 | R.FMALPSFSSVLGR.A                     |
| 384   | 396 | 1427.7323 | 1426.7250 | 1426.7279 | -2.00 | 0 | R.FMALPSFSSVLGR.A + Oxidation (0)     |
| 397   | 404 | 816.4371  | 815.4299  | 815.4501  | -24.8 | 0 | R.AISEAGLR.F                          |
| 411   | 418 | 950.5340  | 949.5268  | 949.5233  | 3.69  | 0 | K.VSLLFSEFR.F                         |
| 462   | 468 | 792.3301  | 791.3228  | 791.3198  | 3.78  | 0 | R.GGDMSDR.Y                           |
| 469   | 494 | 2929.6827 | 2928.6754 | 2928.4254 | 85.4  | 0 | R.YVSPSDEEHVQTVLDAIVSLHGEQAR.E        |
| 495   | 503 | 1145.5118 | 1144.5045 | 1144.5036 | 0.77  | 0 | R.ELYTGQYER.L                         |
| 562   | 577 | 1759.9513 | 1758.9440 | 1758.9437 | 0.18  | 0 | R.GTIQLLLELGMVEEAK.E + Oxidation (0)  |

Spot No.: **40**

Mascot score: **128**

Species: *Fusarium oxysporum f. sp. cubense race 4*

Protein name: **ATP synthase subunit beta, mitochondrial**

NCBI accession No.: **gi| 475664589**      Sequence coverage %: **64**

Matched peptides No.: **24**      Total peptides No.: **84**

Calculated Mr: **55197**      Calculated pI: **5.27**

### Annotated PMF spectra:

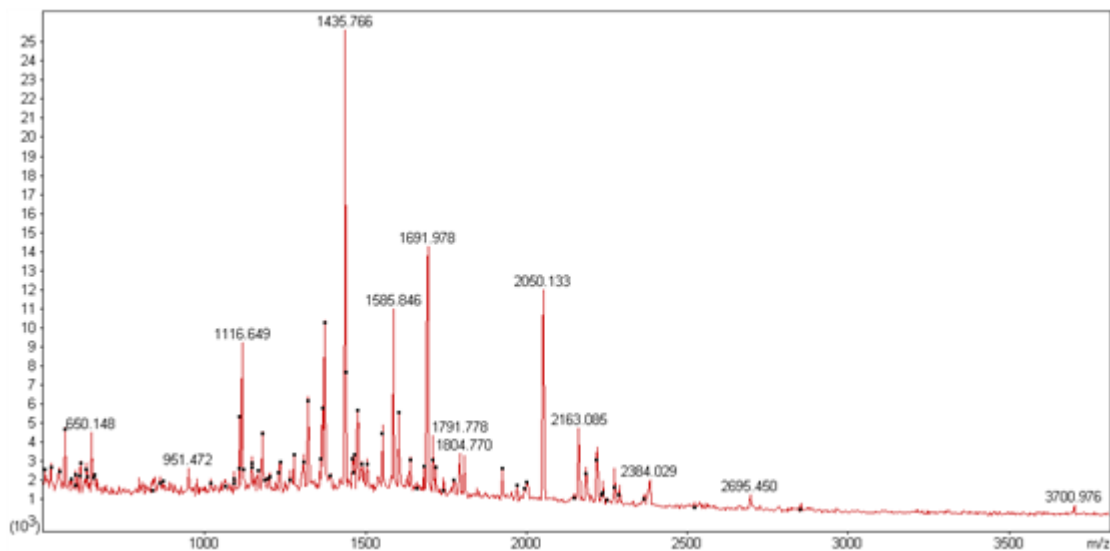

### Probability Based Mowse Score:

Protein score is  $-10 \cdot \log(P)$ , where P is the probability that the observed match is a random event. Protein scores greater than 75 are significant ( $p < 0.05$ ).

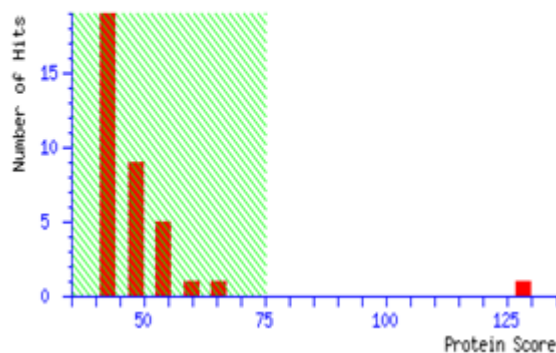

Matched peptide sequences: shown in **Bold Red**

```

1  MFKSGISSFA RAARPAVLPR RALRPSSLRL PISSRWASTA SVGTGKIHQV
51  IGAVVDVKFD TQKLPAILNS LETENNGQKL VLEVSQHLGE NVVRCIAMDG
101  TEGLVRGASA QDTGAPITIP VGPATLGRIM NVTGDPIDER GPIKTDKRLP
151  IHTEAPEFVE QSTSAEVLVT GIKVVDLLAP YARGGKIGLF GGAGVGKTVF
201  IQELINNIK AHGGYSVFTG VGERREGND LYHEMQETSV IQLDGESKVA
251  LVFGQMNEPP GARARVALTG LTVAEYFRDE EGQDVLLFID NIFRFTQAGS
301  EVSALLGRIP SAVGYQPTLA VDMGGMQERI TTTTKGSITS VQAVYVPADD
351  LTDPAPATTF AHLDATTVLS RGISELGIYP AVDPLDSKSR MLDPRVVGQE
401  HYDVATRQQ ILQEYKSLQD IIAILGMDL SEADKLTVER ARKIQRFLSQ
451  PFTVAQVFTG IEGKLVDLKE TINSFKAILN GEGDNLPEGA FYMVGDFASA
501  KAKGEKILAE LEGQ

```

Matched peptides information:

| Start - End | Observed  | Mr (expt) | Mr (calc) | ppm   | M | Peptide                                     |
|-------------|-----------|-----------|-----------|-------|---|---------------------------------------------|
| 1 - 11      | 1230.6166 | 1229.6093 | 1229.6227 | -10.8 | 1 | - .MFKSGISSFA.R.A                           |
| 47 - 58     | 1277.7267 | 1276.7194 | 1276.7503 | -24.2 | 0 | K.IHQVIGAVVDVK.F                            |
| 64 - 79     | 1740.9089 | 1739.9016 | 1739.9053 | -2.13 | 0 | K.LPAILNSLETENNGQK.L                        |
| 80 - 94     | 1691.9779 | 1690.9706 | 1690.9366 | 20.1  | 0 | K.LVLEVSQHLGEMVVR.C                         |
| 107 - 128   | 2050.1329 | 2049.1256 | 2049.0855 | 19.6  | 0 | R.GASAQDTGAPITIPVGPATLGR.I                  |
| 129 - 140   | 1359.6664 | 1358.6591 | 1358.6500 | 6.71  | 0 | R.IHNVTDGPIDER.G                            |
| 148 - 173   | 2851.6013 | 2850.5940 | 2850.5127 | 28.5  | 1 | K.RLPIHTEAPEFVEQSTSAEVLVTGK.V               |
| 149 - 173   | 2695.4498 | 2694.4425 | 2694.4116 | 11.5  | 0 | R.LPIHTEAPEFVEQSTSAEVLVTGK.V                |
| 174 - 183   | 1116.6491 | 1115.6418 | 1115.6339 | 7.12  | 0 | K.VVDLLAPYAR.G                              |
| 198 - 210   | 1502.8449 | 1501.8376 | 1501.8504 | -8.51 | 0 | K.TVFIQELINNIK.A                            |
| 227 - 248   | 2522.2189 | 2521.2116 | 2521.1278 | 33.2  | 0 | R.BONDLYHEMQETSVIQLDGESK.V                  |
| 249 - 263   | 1585.8464 | 1584.8391 | 1584.8082 | 19.5  | 0 | K.VALVFGQMNEPPGAR.A                         |
| 249 - 263   | 1601.8247 | 1600.8174 | 1600.8032 | 8.91  | 0 | K.VALVFGQMNEPPGAR.A + Oxidation (0)         |
| 266 - 278   | 1439.8319 | 1438.8246 | 1438.7820 | 29.6  | 0 | R.VALTGLTVARYFR.D                           |
| 279 - 294   | 1922.9776 | 1921.9703 | 1921.9422 | 14.7  | 0 | R.DEQQDVLLFIDNIFR.F                         |
| 295 - 308   | 1435.7662 | 1434.7589 | 1434.7467 | 8.53  | 0 | R.FTQAGSEVSALLGR.I                          |
| 309 - 329   | 2220.1354 | 2219.1281 | 2219.0715 | 25.5  | 0 | R.IPSAVGYQPTLAVDMGGMQER.I                   |
| 309 - 329   | 2236.1455 | 2235.1382 | 2235.0664 | 32.1  | 0 | R.IPSAVGYQPTLAVDMGGMQER.I + Oxidation (0)   |
| 309 - 329   | 2252.0879 | 2251.0806 | 2251.0613 | 8.58  | 0 | R.IPSAVGYQPTLAVDMGGMQER.I + 2 Oxidation (0) |
| 336 - 371   | 3700.9765 | 3699.9692 | 3699.8632 | 28.7  | 0 | K.GSITSVQAVYVPADLLTDPAPATTFHLDATTVLSR.G     |
| 372 - 388   | 1773.9640 | 1772.9567 | 1772.9196 | 20.9  | 0 | R.GISELGIYPAVDPLDSK.S                       |
| 396 - 407   | 1373.7124 | 1372.7051 | 1372.6735 | 23.0  | 0 | R.VVQGEHYDVATR.V                            |
| 408 - 416   | 1148.6050 | 1147.5977 | 1147.6237 | -22.6 | 0 | R.VQIILQEYK.S                               |
| 447 - 464   | 1969.0261 | 1968.0188 | 1968.0357 | -8.57 | 0 | R.FLSQPFVAQVFTQIEGK.L                       |

Spot No.: **41**

Mascot score: **88**

Species: *Fusarium oxysporum Fo5176*

Protein name: **carboxy-cis,cis-muconate cyclase**

NCBI accession No.: **gi| 342888171**      Sequence coverage %: **43**

Matched peptides No.: **14**      Total peptides No.: **58**

Calculated Mr: **42345**      Calculated pI: **6.76**

### Annotated PMF spectra:

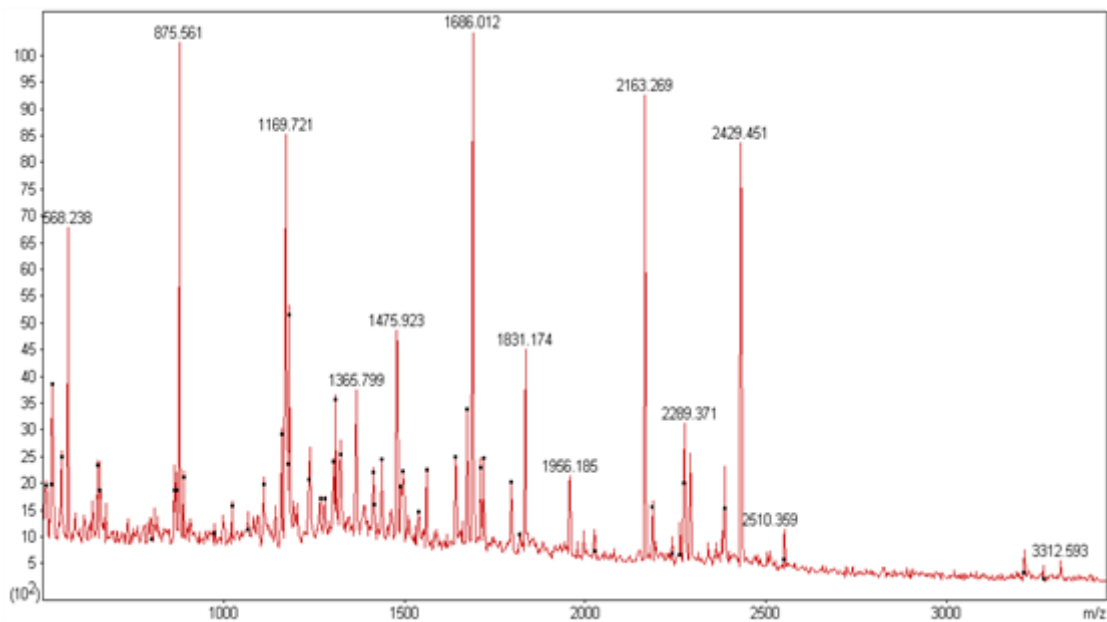

### Probability Based Mowse Score:

Protein score is  $-10 \cdot \log(P)$ , where P is the probability that the observed match is a random event. Protein scores greater than 75 are significant ( $p < 0.05$ ).

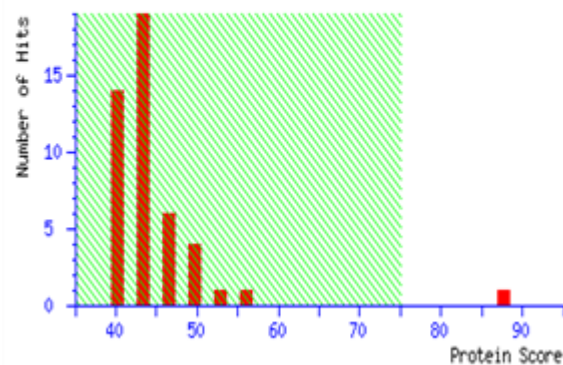

Matched peptide sequences: shown in **Bold Red**

```

1  MKYTIAGLLA TLATSASALP NIARSSYPTA SASSSAAARI LLGNSGHIYV
51 ADFSPKTGKF ELTLNQEIEG GNSWMAYYDF NLLYAVDENS DELRLFNLDL
101 EANKLLTKK KAGSVGVVHL EFNSDKRLV GAAYNGTID VWNTEKGGLE
151 FVKTLKSPGK LGPDKERQAA SHPHQANLDP SGRYFAVNDL GTDSVVIIDS
201 KDDAYKIAKN IPVEAGCGPR HGVFYPRGGK KATHYIVACE LSNQALVYSV
251 SYEENTLAFK HHQSISTYGK DAPAKDPKTA AVGEILLAPN NKDVYISNRL
301 SGNETDSIAR FTIAECGTLT YADTVSSGGL LPRMMSFSLT AKHVFGVNQN
351 GTSGLVALQR GADGKLAEKP VATLPGSAFG EPLFGPQYVQ QILLN

```

Matched peptides information:

| Start - End | Observed  | Mr (expt) | Mr (calc) | ppm  | M | Peptide                     |
|-------------|-----------|-----------|-----------|------|---|-----------------------------|
| 25 - 39     | 1413.8326 | 1412.8253 | 1412.6532 | 122  | 0 | R.SSYPTASASSSAAAR.I         |
| 40 - 56     | 1831.1738 | 1830.1665 | 1829.9676 | 109  | 0 | R.ILLGNSGHIYVADFSPK.T       |
| 95 - 104    | 1176.7299 | 1175.7226 | 1175.6186 | 88.5 | 0 | R.LFNLDLEANK.L              |
| 112 - 126   | 1558.9452 | 1557.9379 | 1557.7787 | 102  | 0 | K.AGSVGVVHLEFNSDK.T         |
| 112 - 128   | 1816.1718 | 1815.1645 | 1814.9275 | 131  | 1 | K.AGSVGVVHLEFNSDKTR.L       |
| 168 - 183   | 1686.0121 | 1685.0048 | 1684.8030 | 120  | 0 | R.QAASHPHQANLDPGR.Y         |
| 184 - 201   | 1956.1849 | 1955.1776 | 1954.9888 | 96.6 | 0 | R.YFAVNDLGTDSVVIIDSK.D      |
| 184 - 206   | 2548.4749 | 2547.4676 | 2547.2381 | 90.1 | 1 | R.YFAVNDLGTDSVVIIDSKDDAYK.I |
| 210 - 220   | 1169.7207 | 1168.7134 | 1168.5659 | 126  | 0 | K.NIPVEAGCGPR.H             |
| 221 - 227   | 875.5607  | 874.5534  | 874.4450  | 124  | 0 | R.HGVFYPR.G                 |
| 261 - 270   | 1157.6733 | 1156.6660 | 1156.5625 | 89.5 | 0 | K.HHQSISTYGK.D              |
| 279 - 292   | 1410.8854 | 1409.8781 | 1409.7878 | 64.1 | 0 | K.TAAVGEILLAPNPK.D          |
| 293 - 299   | 866.5311  | 865.5239  | 865.4294  | 109  | 0 | K.DVYISNR.L                 |
| 311 - 333   | 2429.4513 | 2428.4440 | 2428.1944 | 103  | 0 | R.FTIAECOTLYADTVSSGGLLPR.M  |

Spot No.: **42**

Mascot score: **80**

Species: *Fusarium oxysporum f. sp. cubense race 4*

Protein name: **Alpha-galactosidase 2**

NCBI accession No.: **gi| 475672613**      Sequence coverage %: **29**

Matched peptides No.: **18**      Total peptides No.: **65**

Calculated Mr: **83037**      Calculated pI: **5.01**

### Annotated PMF spectra:

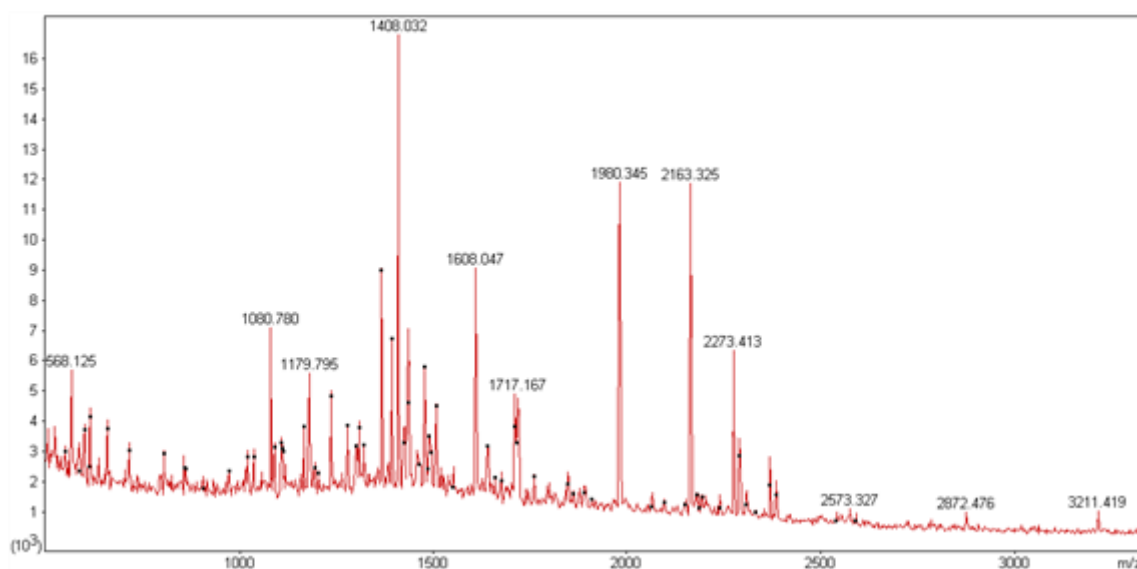

### Probability Based Mowse Score:

Protein score is  $-10 \cdot \log(P)$ , where P is the probability that the observed match is a random event. Protein scores greater than 75 are significant ( $p < 0.05$ ).

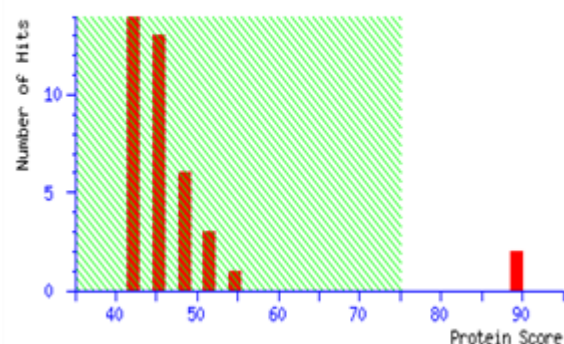

Matched peptide sequences: shown in **Bold Red**

```

1 MVLVTSKGIT TAAVLFSQVI SAFAETSDPI RVDGTSFALN GNNVSYRFHV
51 DNTTGD LIND HYGGPVAEDG ITTEIGPIQG WVNLI GRVRR EFPDHGRGDF
101 RIPAFQLQQA SGTTVTDFRY KSHEVVQGKP GLPGLPSTFG EADDVSTLVV
151 HMYDNYSSIA VDLSYSIFPE YDAIVRSVNI TNQGNATINL RKVSSWSVDL
201 QQDNLDLIEI KGDWAREGMR VRRKVDFTGQ GFQSSTGYSS HLHNPFLALV
251 SSTTTETQGE AWGFSLVYTG SFAVDVEKSS QGLTRAILGL NPLDFSWPLK
301 PEQTFITPEV VSVFSNKGVG GMSRQFHRLY RKHLMKSKYA EETRPVLLNS
351 WEGLAFDINE TAIEKIAKQS ADLGIKLFVM DDGWFGNKYP RVNDTAGLGD
401 WQPDKSRFPD GLTPLVENVT DLKVANSSDE LKFGIWFEPE MVNPESDLYD
451 KHPDWAIHAG SYPRTETRNQ LVLNLALPEV QEFIIDFVSK VLRESPISYV
501 KWDNNRGIHE TPDPTLNYKY MLGLYHVFET LISRFPDVLW EGCASGGGRF
551 DPGVLQWFPQ IWTSDDTDAV ERIAIQFGTS LAYPPSAMGA HLSHVPNGNT
601 QRITSVKFRA HVAMMGGSFG VELDPSDLEP EEREQIPGLI ELSEKINPIV
651 ITGDFYRLAL PEETNYPAGQ FISEDGKKVV LFAFQTRATI NNSWPWFERLQ
701 GLDASAKYKV DNNQTVSGST LMNLGIQLRF EGDYDSQVLM IEKQ

```

Matched peptides information:

| Start - End | Observed  | Mr (expt) | Mr (calc) | ppm  | M | Peptide                                      |
|-------------|-----------|-----------|-----------|------|---|----------------------------------------------|
| 91 - 97     | 857.4496  | 856.4423  | 856.3828  | 69.5 | 0 | R.EFPDHGR.G                                  |
| 102 - 119   | 1980.3447 | 1979.3374 | 1979.0113 | 165  | 0 | R.IPAFQLQQASGTTVTDFR.Y                       |
| 192 - 211   | 2330.4449 | 2329.4376 | 2329.2165 | 94.9 | 1 | R.RVSSWSVDLQQDNLDLIEIK.G                     |
| 377 - 391   | 1845.2127 | 1844.2054 | 1843.8716 | 181  | 1 | K.LFVMDGMPGNKYFR.V                           |
| 377 - 391   | 1861.1643 | 1860.1570 | 1859.8665 | 156  | 1 | K.LFVMDGMPGNKYFR.V + Oxidation (0)           |
| 408 - 423   | 1758.1761 | 1757.1688 | 1756.9247 | 139  | 0 | R.FPDGLTPLVENVTDLK.V                         |
| 452 - 464   | 1506.9967 | 1505.9894 | 1505.7164 | 181  | 0 | K.EFDMAIHAGSYFR.T                            |
| 494 - 506   | 1608.0469 | 1607.0396 | 1606.7739 | 165  | 1 | R.ESPISYVWDNNR.G                             |
| 507 - 519   | 1484.9839 | 1483.9766 | 1483.7307 | 166  | 0 | R.GIHETPDPTLNYK.Y                            |
| 610 - 633   | 2573.3272 | 2572.3199 | 2572.1574 | 63.2 | 0 | R.AHVAMMGGSFGVELDPSDLEPEER.E                 |
| 610 - 633   | 2589.3288 | 2588.3215 | 2588.1523 | 65.4 | 0 | R.AHVAMMGGSFGVELDPSDLEPEER.E + Oxidation (0) |
| 646 - 657   | 1408.0320 | 1407.0247 | 1406.7558 | 191  | 0 | K.INPITVITGDFYR.L                            |
| 658 - 677   | 2179.3048 | 2178.2975 | 2178.0480 | 115  | 0 | R.LALPEETNYPAGQFISEDGK.K                     |
| 658 - 678   | 2307.4160 | 2306.4087 | 2306.1430 | 115  | 1 | R.LALPEETNYPAGQFISEDGK.V                     |
| 679 - 687   | 1080.7796 | 1079.7723 | 1079.6128 | 148  | 0 | K.VVLFAPQTR.A                                |
| 688 - 698   | 1391.9621 | 1390.9548 | 1390.6782 | 199  | 0 | R.ATINNSWPFR.L                               |
| 699 - 709   | 1193.7878 | 1192.7805 | 1192.6452 | 114  | 1 | R.LQGLDASAKYK.V                              |
| 730 - 743   | 1674.0918 | 1673.0845 | 1672.7654 | 191  | 0 | R.FEGDYDSQVLMIEK.Q                           |

Spot No.: **43**

Mascot score: **113**

Species: *Fusarium oxysporum f. sp. cubense race 4*

Protein name: **Alpha-galactosidase 2**

NCBI accession No.: **gi| 475672613**      Sequence coverage %: **36**

Matched peptides No.: **24**      Total peptides No.: **79**

Calculated Mr: **83037**      Calculated pI: **5.01**

### Annotated PMF spectra:

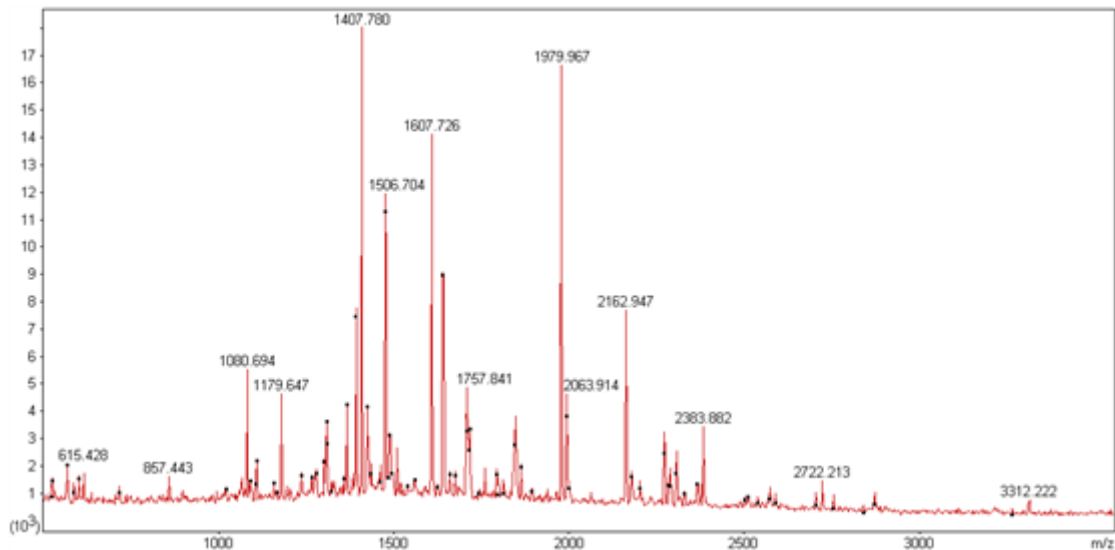

### Probability Based Mowse Score:

Protein score is  $-10 \cdot \log(P)$ , where P is the probability that the observed match is a random event. Protein scores greater than 75 are significant ( $p < 0.05$ ).

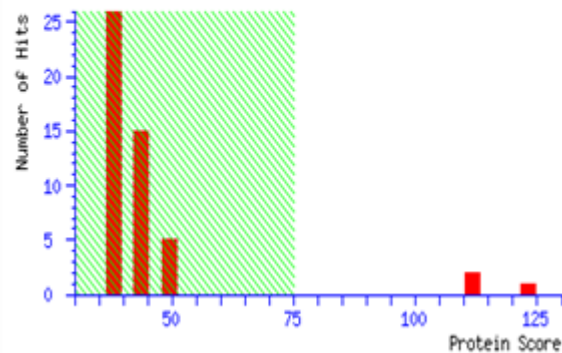



## Matched peptide sequences: shown in **Bold Red**

```

1  MVLVTSKGIT TAAVLFSQVI SAFAETSDPI RVDGTSFALN GNNVSYRFHV
51 DNTTGLDLIND HYGGPVAEDG ITTEIGPIQG WVNLIQGRVRR EFPDHGRGDF
101 RIPAFQLQQA SGTTVTDFRY KSHEVVQGKP GLPGLPSTFG EADDVSTLVV
151 HMYDNYSSIA VDLSYSIFPE YDAIVRSVNI TNQGNATINL RKVSSWSVDL
201 QQDNLDLIEI KGDWAREGMR VRRKVDFTGQ GFQSSTGYSS HLHNPFLALV
251 SSTTTETQGE AWGFSLVYTG SFAVDVEKSS QGLTRAILGL NPLDFSWPLK
301 PEQFTTPEV VSVFSNKGVG GMSRQFHRLY RKHLMKSKYA EETRPVLLNS
351 WEGLAFDINE TAIEKIAKQS ADLGIKLFVM DDGWFGNKYP RVNDTAGLGD
401 WQPDKSRFPD GLTPLVENVT DLKVANSSDE LKFGIWFEPE MVNPESDLYD
451 KHPDWAHAG SYPRTETRNQ LVLNLALPEV QEFIIDFVSK VLRESPISYV
501 KWDNNRGIHE TPDPTLNYKY MLGLYHVFET LTSRFPDVLW EGCASGGGRF
551 DPGVLQWFPQ IWTSDDTDAV ERIAIQFGTS LAYPPSAMGA HLSHVPNGNT
601 QRITSVKFRA HVAMMGSFG VELDPSDLEP EEREQIPGLI ELSEKINPIV
651 ITGDFYRLAL PEETNYPAGQ FISEDGKKVV LFAFQTRATI NNSWPWFRLQ
701 GLDASAKYKV DNNQTVSGST LMNLGIQLRF EGDYDSQVLM IEKQ

```

## Matched peptides information:

| Start - End | Observed  | Mr (expt) | Mr (calc) | ppm   | M | Peptide                                                  |
|-------------|-----------|-----------|-----------|-------|---|----------------------------------------------------------|
| 91 - 97     | 857.4433  | 856.4360  | 856.3828  | 62.2  | 0 | R.EFPD <b>BGR</b> .G                                     |
| 102 - 119   | 1979.9665 | 1978.9592 | 1979.0113 | -26.3 | 0 | R. <b>RIPAFQLQQA</b> <b>SGTTVTDFR</b> .Y                 |
| 192 - 211   | 2330.1207 | 2329.1134 | 2329.2165 | -44.3 | 1 | R. <b>KVSSMSVDLQQDNLDLIEI</b> .G                         |
| 193 - 211   | 2201.9817 | 2200.9744 | 2201.1216 | -66.8 | 0 | K. <b>VSSWSVDLQQDNLDLIEI</b> .G                          |
| 325 - 328   | 587.2710  | 586.2638  | 586.2976  | -57.7 | 0 | R. <b>QFRR</b> .L                                        |
| 377 - 391   | 1844.8396 | 1843.8323 | 1843.8716 | -21.3 | 1 | K.L <b>FMDDGWFGNKYR</b> .V                               |
| 377 - 391   | 1860.8034 | 1859.7961 | 1859.8665 | -37.8 | 1 | K.L <b>FMDDGWFGNKYR</b> .V + Oxidation (0)               |
| 406 - 423   | 2000.9523 | 1999.9450 | 2000.0579 | -56.4 | 1 | K. <b>SRFPDGLTPLVENVTDLK</b> .V                          |
| 408 - 423   | 1757.8410 | 1756.8337 | 1756.9247 | -51.8 | 0 | R. <b>FDGLTPLVENVTDLK</b> .V                             |
| 452 - 464   | 1506.7041 | 1505.6968 | 1505.7164 | -13.0 | 0 | K. <b>HPDWAHAGSYPR</b> .T                                |
| 452 - 468   | 1993.9295 | 1992.9222 | 1992.9554 | -16.7 | 1 | K. <b>HPDWAHAGSYPRTE</b> .N                              |
| 507 - 519   | 1484.6899 | 1483.6826 | 1483.7307 | -32.4 | 0 | R. <b>GIHETPDPTLNYK</b> .Y                               |
| 507 - 534   | 3312.2217 | 3311.2144 | 3310.6332 | 176   | 1 | R. <b>GIHETPDPTLNYKMLGLYHVFETLTSR</b> .F + Oxidation (0) |
| 535 - 549   | 1607.7263 | 1606.7190 | 1606.7198 | -0.51 | 0 | R. <b>FDVLMEOCASOGR</b> .F                               |
| 550 - 572   | 2722.2134 | 2721.2061 | 2721.2711 | -23.9 | 0 | R. <b>FDGVLQWFPQIWTSDOTDAVER</b> .I                      |
| 610 - 633   | 2573.1275 | 2572.1202 | 2572.1574 | -14.4 | 0 | R. <b>AVAMMGSGFVELDPSDLEPEER</b> .E                      |
| 610 - 633   | 2589.0802 | 2588.0729 | 2588.1523 | -30.7 | 0 | R. <b>AVAMMGSGFVELDPSDLEPEER</b> .E + Oxidation (0)      |
| 634 - 645   | 1355.7315 | 1354.7242 | 1354.7344 | -7.48 | 0 | R. <b>EQIPGLIEISEK</b> .I                                |
| 646 - 657   | 1407.7799 | 1406.7726 | 1406.7558 | 12.0  | 0 | K. <b>INPIVITODFYR</b> .L                                |
| 658 - 677   | 2178.9372 | 2177.9299 | 2178.0480 | -54.2 | 0 | R.LAL <b>PEETNYPAGQFISEDG</b> .K                         |
| 658 - 678   | 2307.0508 | 2306.0435 | 2306.1430 | -43.1 | 1 | R.LAL <b>PEETNYPAGQFISEDG</b> .V                         |
| 679 - 687   | 1080.6942 | 1079.6869 | 1079.6128 | 68.7  | 0 | K. <b>VVLPFQTR</b> .A                                    |
| 688 - 698   | 1391.7010 | 1390.6937 | 1390.6782 | 11.2  | 0 | R. <b>ATINNSWPFR</b> .L                                  |
| 730 - 743   | 1673.7111 | 1672.7038 | 1672.7654 | -36.8 | 0 | R. <b>EGDYDSQVLMIEK</b> .Q                               |

Spot No.: **44**

NCBI accession No.: **gi/342878413**

Plant species: **quinone oxidoreductase**

Protein name: ***hypothetical protein ARALYDRAFT\_486548***

Mascot score: **163**

Sequence coverage %: **18**

The number of matched peptides with  $p \leq 0.05$ : **5**

Calculated Mr: **21740**

Calculated Pi: **5.54**

### Annotated MS spectra:

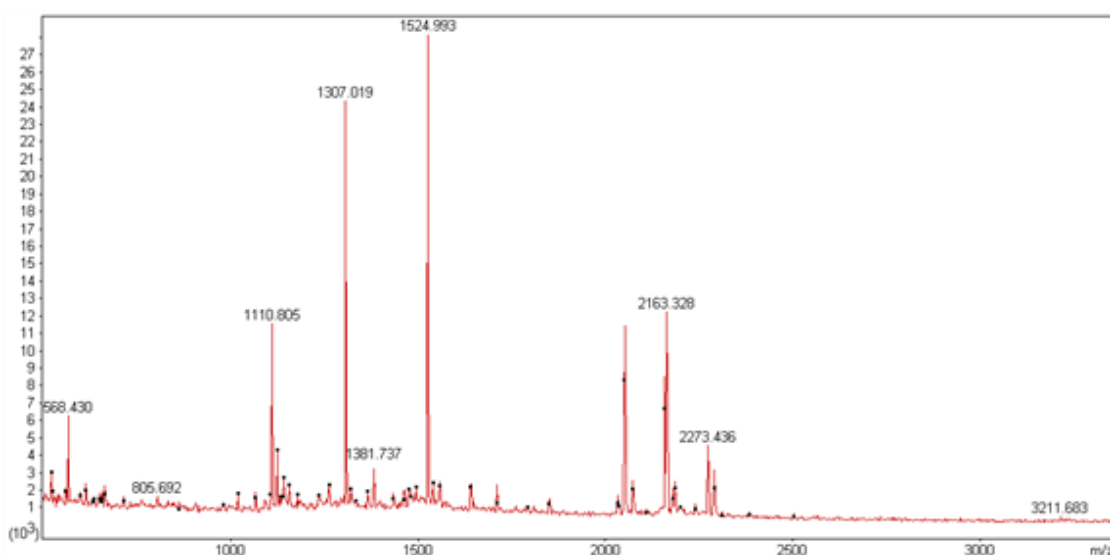

### Probability Based Mowse Score:

Ions score is  $-10 \cdot \log(P)$ , where  $P$  is the probability that the observed match is a random event.

Individual ions scores  $> 48$  indicate identity or extensive homology ( $p < 0.05$ ).

Protein scores are derived from ions scores as a non-probabilistic basis for ranking protein hits.

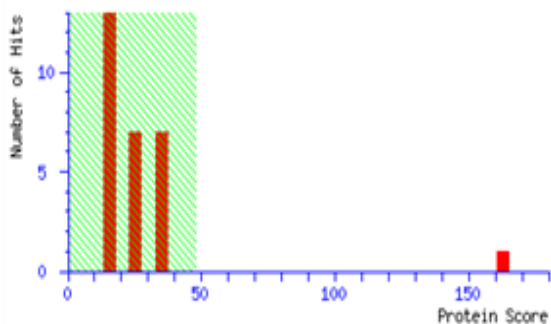

Matched peptide sequences: shown in **Bold Red**

```

1  MAPKIAIVYY SMYGHKQLA EAEKAGIEKA GGSADIFQVP ETLPEDVLAK
51  MHAPPKPTDV PTLDDPSVLE GYDAFLLGIP TRYGNFPAQW KAFWDKTGKQ
101 WASGGFWGKM AGIFVSTASQ GGGQETTAQN AISTLTHHGI IYVPPGYAKA
151 FGVLTDLSEV RGGSAWGAGT FAGADGSRQP SAKELELAQI QGENFYQTVA
201 KFTG

```

Matched peptides information:

| Query                      | Start - End | Observed  | Mr (expt) | Mr (calc) | ppm | M | Score | Expect  | Rank          | U | Peptide               |
|----------------------------|-------------|-----------|-----------|-----------|-----|---|-------|---------|---------------|---|-----------------------|
| $\rightarrow$ <sub>1</sub> | 83 - 91     | 1110.8051 | 1109.7978 | 1109.5294 | 242 | 0 | 27    | 8.4     | $\frac{1}{1}$ | U | R.YRFFPAQGR.A         |
| $\rightarrow$ <sub>2</sub> | 83 - 91     | 1110.8051 | 1109.7978 | 1109.5294 | 242 | 0 | 27    | 8.4     | $\frac{1}{1}$ | U | R.YRFFPAQGR.A         |
| $\rightarrow$ <sub>2</sub> | 100 - 161   | 1307.0190 | 1306.0117 | 1305.6929 | 244 | 0 | 55    | 0.0087  | $\frac{1}{1}$ | U | K.AFGVLTDLSEVR.G      |
| $\rightarrow$ <sub>1</sub> | 100 - 161   | 1307.0190 | 1306.0117 | 1305.6929 | 244 | 0 | 55    | 0.0087  | $\frac{1}{1}$ | U | K.AFGVLTDLSEVR.G      |
| $\rightarrow$ <sub>2</sub> | 162 - 178   | 1524.9830 | 1523.9857 | 1523.6753 | 204 | 0 | 81    | 2.9e-05 | $\frac{1}{1}$ | U | R.GGSAMGAGTFAGADGSR.Q |

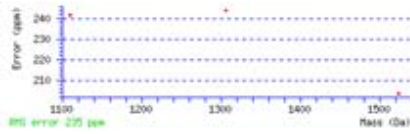

## Annotated ion spectra of the matched peptides with $p \leq 0.05$ :

CID No.: **44-1110.8**

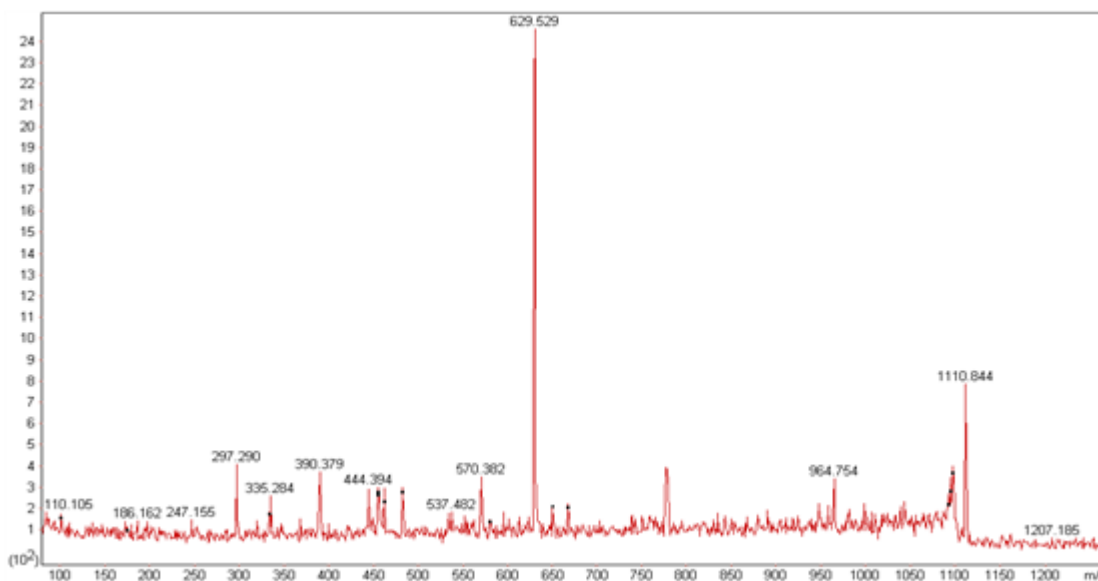

MS/MS Fragmentation of **R.YGNFPAQWK.A**

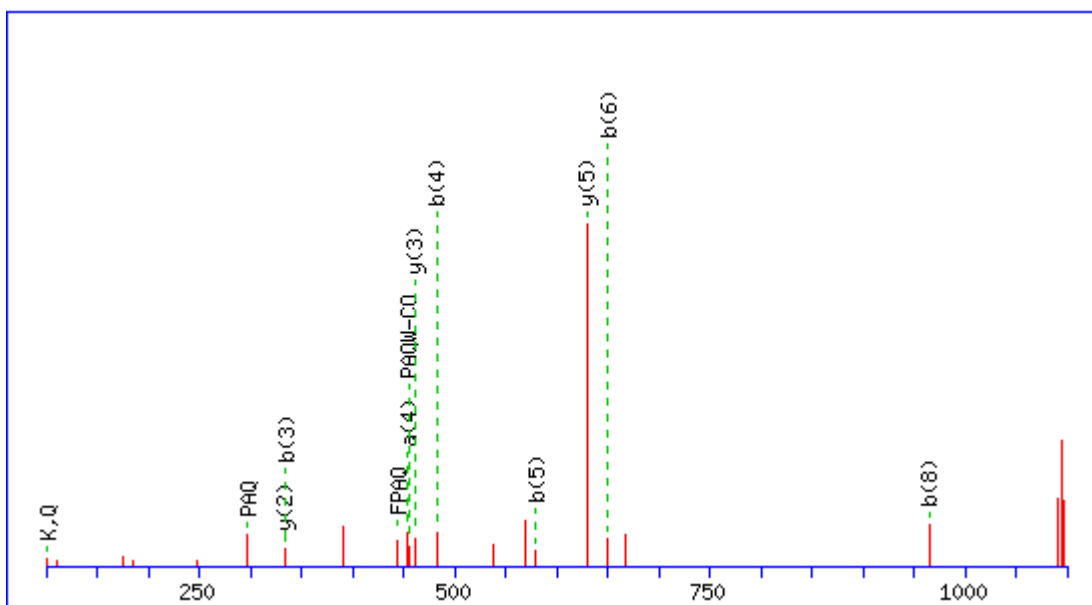

Monoisotopic mass of neutral peptide  $M_r(\text{calc})$ : 1109.5294

| # | Immon.          | a               | a <sup>+</sup> | b               | b <sup>+</sup> | d        | Seq. | v        | w        | y               | y <sup>+</sup>  | # |
|---|-----------------|-----------------|----------------|-----------------|----------------|----------|------|----------|----------|-----------------|-----------------|---|
| 1 | 136.0757        | 136.0757        |                | 164.0706        |                | 44.0495  | Y    |          |          |                 |                 | 9 |
| 2 | 30.0338         | 193.0972        |                | 221.0921        |                |          | G    |          |          | 947.4734        | 930.4468        | 8 |
| 3 | 87.0553         | 307.1401        | 290.1135       | <b>335.1350</b> | 318.1084       | 264.1343 | N    | 831.4148 | 830.4196 | 890.4519        | 873.4254        | 7 |
| 4 | 120.0808        | <b>454.2085</b> | 437.1819       | <b>482.2034</b> | 465.1769       |          | F    | 684.3464 |          | 776.4090        | 759.3824        | 6 |
| 5 | 70.0651         | 551.2613        | 534.2347       | <b>579.2562</b> | 562.2296       | 525.2456 | P    | 587.2936 | 586.2984 | <b>629.3406</b> | 612.3140        | 5 |
| 6 | 44.0495         | 622.2984        | 605.2718       | <b>650.2933</b> | 633.2667       |          | A    | 516.2565 |          | 532.2878        | 515.2613        | 4 |
| 7 | <b>101.0709</b> | 750.3570        | 733.3304       | 778.3519        | 761.3253       | 693.3355 | Q    | 388.1979 | 387.2027 | <b>461.2507</b> | <b>444.2241</b> | 3 |
| 8 | 159.0917        | 936.4363        | 919.4097       | <b>964.4312</b> | 947.4046       |          | W    | 202.1186 |          | <b>333.1921</b> | 316.1656        | 2 |
| 9 | <b>101.1073</b> |                 |                |                 |                |          | K    | 74.0237  | 73.0284  | 147.1128        | 130.0863        | 1 |

| Seq          | ya              | yb       | Seq           | ya       | yb       | Seq          | ya       | yb              |
|--------------|-----------------|----------|---------------|----------|----------|--------------|----------|-----------------|
| <b>GN</b>    | 144.0768        | 172.0717 | <b>GNF</b>    | 291.1452 | 319.1401 | <b>GNFP</b>  | 388.1979 | 416.1928        |
| <b>GNFPA</b> | 459.2350        | 487.2300 | <b>GNFPAQ</b> | 587.2936 | 615.2885 | <b>NF</b>    | 234.1237 | 262.1186        |
| <b>NFP</b>   | 331.1765        | 359.1714 | <b>NFPA</b>   | 402.2136 | 430.2085 | <b>NFPAQ</b> | 530.2722 | 558.2671        |
| <b>FP</b>    | 217.1335        | 245.1285 | <b>FPA</b>    | 288.1707 | 316.1656 | <b>FPAQ</b>  | 416.2292 | <b>444.2241</b> |
| <b>FPAQW</b> | 602.3085        | 630.3035 | <b>PA</b>     | 141.1022 | 169.0972 | <b>PAQ</b>   | 269.1608 | <b>297.1557</b> |
| <b>PAQW</b>  | <b>455.2401</b> | 483.2350 | <b>AQ</b>     | 172.1081 | 200.1030 | <b>AQW</b>   | 358.1874 | 386.1823        |
| <b>QW</b>    | 287.1503        | 315.1452 |               |          |          |              |          |                 |

## Annotated ion spectra of the matched peptides with $p \leq 0.05$ :

CID No.: **44-1307.08**

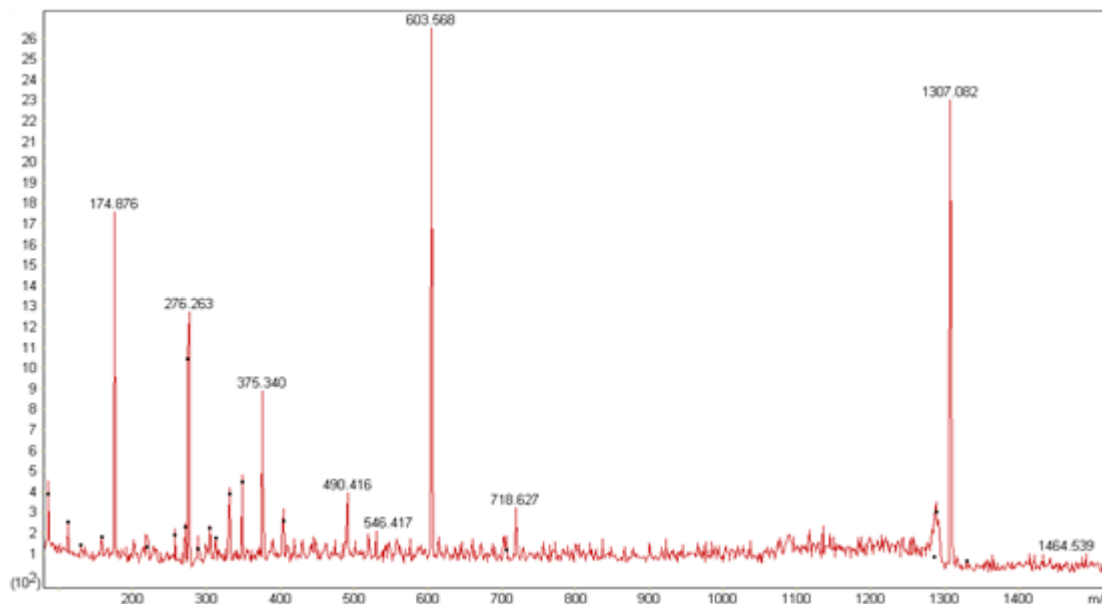

### MS/MS Fragmentation of **K.AFGVLTDLSEVR.G**

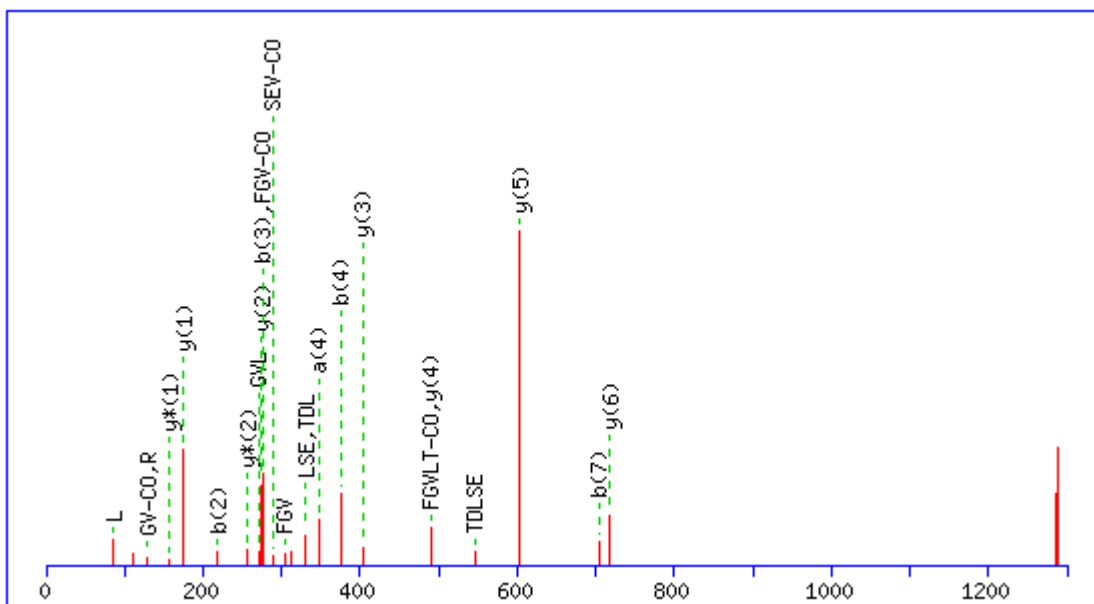

Monoisotopic mass of neutral peptide  $M_r(\text{calc})$ : 1305.6929

| #  | Immon.   | a         | a <sup>0</sup> | b         | b <sup>0</sup> | d         | d'       | Seq. | v         | w         | w'       | y         | y <sup>+</sup> | y <sup>0</sup> | #  |
|----|----------|-----------|----------------|-----------|----------------|-----------|----------|------|-----------|-----------|----------|-----------|----------------|----------------|----|
| 1  | 44.0495  | 44.0495   |                | 72.0444   |                | 44.0495   |          | A    |           |           |          |           |                |                | 12 |
| 2  | 120.0808 | 191.1179  |                | 219.1128  |                |           |          | F    | 1143.6004 |           |          | 1235.6630 | 1218.6365      | 1217.6525      | 11 |
| 3  | 30.0338  | 248.1394  |                | 276.1343  |                |           |          | G    |           |           |          | 1088.5946 | 1071.5681      | 1070.5840      | 10 |
| 4  | 72.0808  | 347.2078  |                | 375.2027  |                | 333.1921  |          | V    | 987.5106  | 1000.5310 |          | 1031.5732 | 1014.5466      | 1013.5626      | 9  |
| 5  | 86.0964  | 460.2918  |                | 488.2867  |                | 418.2449  |          | L    | 874.4265  | 873.4312  |          | 932.5047  | 915.4782       | 914.4942       | 8  |
| 6  | 74.0600  | 561.3395  | 543.3289       | 589.3344  | 571.3239       | 545.3446  | 547.3239 | T    | 773.3788  | 786.3992  | 788.3785 | 819.4207  | 802.3941       | 801.4101       | 7  |
| 7  | 88.0393  | 676.3665  | 658.3559       | 704.3614  | 686.3508       | 632.3766  |          | D    | 658.3519  | 657.3566  |          | 718.3730  | 701.3464       | 700.3624       | 6  |
| 8  | 86.0964  | 789.4505  | 771.4400       | 817.4454  | 799.4349       | 747.4036  |          | L    | 545.2678  | 544.2726  |          | 603.3461  | 586.3195       | 585.3355       | 5  |
| 9  | 60.0444  | 876.4825  | 858.4720       | 904.4775  | 886.4669       | 860.4876  |          | S    | 458.2358  | 457.2405  |          | 490.2620  | 473.2354       | 472.2514       | 4  |
| 10 | 102.0550 | 1005.5251 | 987.5146       | 1033.5201 | 1015.5095      | 947.5197  |          | E    | 329.1932  | 328.1979  |          | 403.2300  | 386.2034       | 385.2194       | 3  |
| 11 | 72.0808  | 1104.5936 | 1086.5830      | 1132.5885 | 1114.5779      | 1090.5779 |          | V    | 230.1248  | 243.1452  |          | 274.1874  | 257.1608       |                | 2  |
| 12 | 129.1135 |           |                |           |                |           |          | R    | 74.0237   | 73.0284   |          | 175.1190  | 158.0924       |                | 1  |

| Seq           | ya       | yb       | Seq            | ya       | yb       | Seq           | ya       | yb       |
|---------------|----------|----------|----------------|----------|----------|---------------|----------|----------|
| <b>FG</b>     | 177.1022 | 205.0972 | <b>FGV</b>     | 276.1707 | 304.1656 | <b>FGVL</b>   | 389.2547 | 417.2496 |
| <b>FGVLT</b>  | 490.3024 | 518.2973 | <b>FGVLTDL</b> | 605.3293 | 633.3243 | <b>GV</b>     | 129.1022 | 157.0972 |
| <b>GVL</b>    | 242.1863 | 270.1812 | <b>GVLT</b>    | 343.2340 | 371.2289 | <b>GVLTD</b>  | 458.2609 | 486.2558 |
| <b>GVLTDL</b> | 571.3450 | 599.3399 | <b>GVLTDLS</b> | 658.3770 | 686.3719 | <b>VL</b>     | 185.1648 | 213.1598 |
| <b>VLT</b>    | 286.2125 | 314.2074 | <b>VLTD</b>    | 401.2395 | 429.2344 | <b>VLTDL</b>  | 514.3235 | 542.3184 |
| <b>VLTDLS</b> | 601.3556 | 629.3505 | <b>LT</b>      | 187.1441 | 215.1390 | <b>LTD</b>    | 302.1710 | 330.1660 |
| <b>LTDL</b>   | 415.2551 | 443.2500 | <b>LTDLS</b>   | 502.2871 | 530.2821 | <b>LTDLSE</b> | 631.3297 | 659.3246 |
| <b>TD</b>     | 189.0870 | 217.0819 | <b>TDL</b>     | 302.1710 | 330.1660 | <b>TDLS</b>   | 389.2031 | 417.1980 |
| <b>TDLSE</b>  | 518.2457 | 546.2406 | <b>TDLSEV</b>  | 617.3141 | 645.3090 | <b>DL</b>     | 201.1234 | 229.1183 |
| <b>DLS</b>    | 288.1554 | 316.1503 | <b>DLSE</b>    | 417.1980 | 445.1929 | <b>DLSEV</b>  | 516.2664 | 544.2613 |
| <b>LS</b>     | 173.1285 | 201.1234 | <b>LSE</b>     | 302.1710 | 330.1660 | <b>LSEV</b>   | 401.2395 | 429.2344 |
| <b>SE</b>     | 189.0870 | 217.0819 | <b>SEV</b>     | 288.1554 | 316.1503 | <b>EV</b>     | 201.1234 | 229.1183 |

**Annotated ion spectra of the matched peptides with  $p \leq 0.05$ :**

CID No.: **44-1525.02**

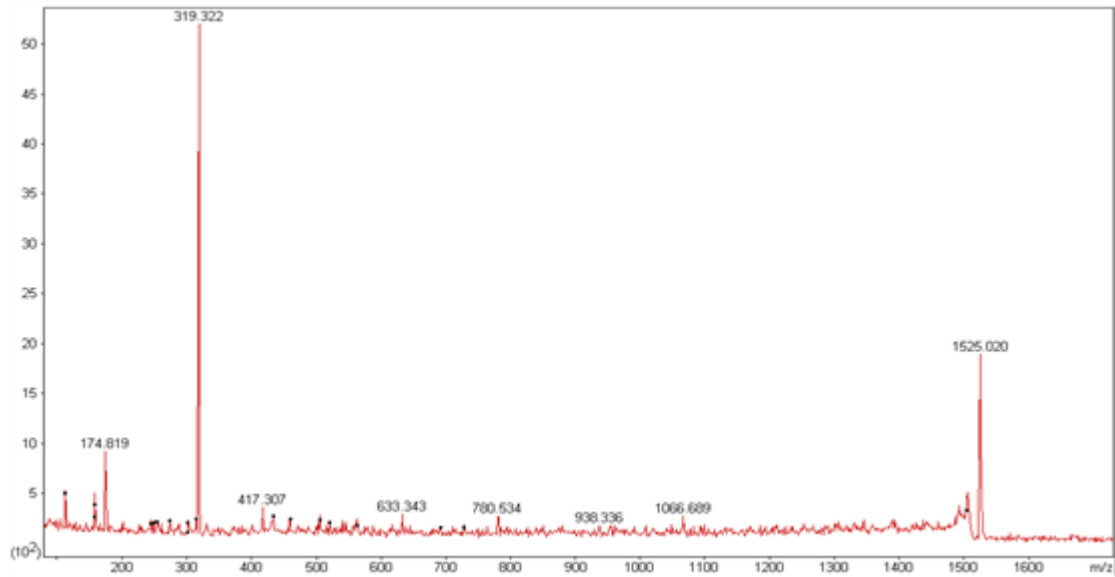

MS/MS Fragmentation of **R.GGSAWGAGTFAGADGSR.Q**

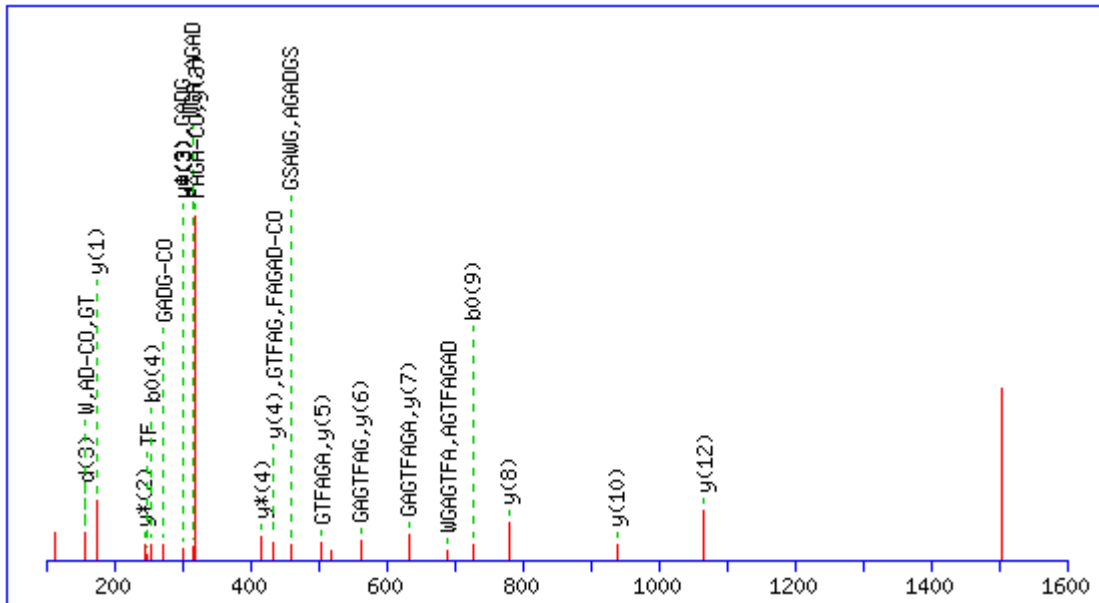

Monoisotopic mass of neutral peptide  $M_r(\text{calc})$ : 1523.6753



| #  | Immon.   | a         | a <sup>0</sup> | b         | b <sup>0</sup> | d         | d'       | Seq. | v         | w         | w'       | y         | y*        | y <sup>0</sup> | #  |
|----|----------|-----------|----------------|-----------|----------------|-----------|----------|------|-----------|-----------|----------|-----------|-----------|----------------|----|
| 1  | 30.0338  | 30.0338   |                | 58.0287   |                | 44.0495   |          | G    |           |           |          |           |           |                | 17 |
| 2  | 30.0338  | 87.0553   |                | 115.0502  |                |           |          | G    |           |           |          | 1467.6611 | 1450.6346 | 1449.6506      | 16 |
| 3  | 60.0444  | 174.0873  | 156.0768       | 202.0822  | 184.0717       | 158.0924  |          | S    | 1378.6135 | 1377.6182 |          | 1410.6397 | 1393.6131 | 1392.6291      | 15 |
| 4  | 44.0495  | 245.1244  | 227.1139       | 273.1193  | 255.1088       |           |          | A    | 1307.5763 |           |          | 1323.6076 | 1306.5811 | 1305.5971      | 14 |
| 5  | 159.0917 | 431.2037  | 413.1932       | 459.1987  | 441.1881       |           |          | W    | 1121.4970 |           |          | 1252.5705 | 1235.5440 | 1234.5600      | 13 |
| 6  | 30.0338  | 488.2252  | 470.2146       | 516.2201  | 498.2096       |           |          | G    |           |           |          | 1066.4912 | 1049.4647 | 1048.4806      | 12 |
| 7  | 44.0495  | 559.2623  | 541.2518       | 587.2572  | 569.2467       |           |          | A    | 993.4385  |           |          | 1009.4698 | 992.4432  | 991.4592       | 11 |
| 8  | 30.0338  | 616.2838  | 598.2732       | 644.2787  | 626.2681       |           |          | G    |           |           |          | 938.4326  | 921.4061  | 920.4221       | 10 |
| 9  | 74.0600  | 717.3315  | 699.3209       | 745.3264  | 727.3158       | 701.3365  | 703.3158 | T    | 835.3693  | 848.3897  | 850.3690 | 881.4112  | 864.3846  | 863.4006       | 9  |
| 10 | 120.0808 | 864.3999  | 846.3893       | 892.3948  | 874.3842       |           |          | F    | 688.3009  |           |          | 780.3635  | 763.3369  | 762.3529       | 8  |
| 11 | 44.0495  | 935.4370  | 917.4264       | 963.4319  | 945.4213       |           |          | A    | 617.2638  |           |          | 633.2951  | 616.2685  | 615.2845       | 7  |
| 12 | 30.0338  | 992.4585  | 974.4479       | 1020.4534 | 1002.4428      |           |          | G    |           |           |          | 562.2580  | 545.2314  | 544.2474       | 6  |
| 13 | 44.0495  | 1063.4956 | 1045.4850      | 1091.4905 | 1073.4799      |           |          | A    | 489.2052  |           |          | 505.2365  | 488.2100  | 487.2259       | 5  |
| 14 | 88.0393  | 1178.5225 | 1160.5119      | 1206.5174 | 1188.5069      | 1134.5327 |          | D    | 374.1783  | 373.1830  |          | 434.1994  | 417.1728  | 416.1888       | 4  |
| 15 | 30.0338  | 1235.5440 | 1217.5334      | 1263.5389 | 1245.5283      |           |          | G    |           |           |          | 319.1724  | 302.1459  | 301.1619       | 3  |
| 16 | 60.0444  | 1322.5760 | 1304.5654      | 1350.5709 | 1332.5604      | 1306.5811 |          | S    | 230.1248  | 229.1295  |          | 262.1510  | 245.1244  | 244.1404       | 2  |
| 17 | 129.1135 |           |                |           |                |           |          | R    | 74.0237   | 73.0284   |          | 175.1190  | 158.0924  |                | 1  |

| Seq      | ya       | yb       | Seq      | ya       | yb       | Seq      | ya       | yb       |
|----------|----------|----------|----------|----------|----------|----------|----------|----------|
| GS       | 117.0659 | 145.0608 | GSA      | 188.1030 | 216.0979 | GSAW     | 374.1823 | 402.1772 |
| GSAWG    | 431.2037 | 459.1987 | GSAWGA   | 502.2409 | 530.2358 | GSAWGAG  | 559.2623 | 587.2572 |
| GSAWGAGT | 660.3100 | 688.3049 | SA       | 131.0815 | 159.0764 | SAW      | 317.1608 | 345.1557 |
| SAWG     | 374.1823 | 402.1772 | SAWGA    | 445.2194 | 473.2143 | SAWGAG   | 502.2409 | 530.2358 |
| SAWGAGT  | 603.2885 | 631.2835 | AW       | 230.1288 | 258.1237 | AWG      | 287.1503 | 315.1452 |
| AWGA     | 358.1874 | 386.1823 | AWGAG    | 415.2088 | 443.2037 | AWGAGT   | 516.2565 | 544.2514 |
| AWGAGTF  | 663.3249 | 691.3198 | WG       | 216.1131 | 244.1081 | WGA      | 287.1503 | 315.1452 |
| WGAG     | 344.1717 | 372.1666 | WGAGT    | 445.2194 | 473.2143 | WGAGTF   | 592.2878 | 620.2827 |
| WGAGTFA  | 663.3249 | 691.3198 | GA       | 101.0709 | 129.0659 | GAG      | 158.0924 | 186.0873 |
| GAGT     | 259.1401 | 287.1350 | GAGTF    | 406.2085 | 434.2034 | GAGTFA   | 477.2456 | 505.2405 |
| GAGTFAG  | 534.2671 | 562.2620 | GAGTFAGA | 605.3042 | 633.2991 | AG       | 101.0709 | 129.0659 |
| AGT      | 202.1186 | 230.1135 | AGTF     | 349.1870 | 377.1819 | AGTFA    | 420.2241 | 448.2191 |
| AGTFAG   | 477.2456 | 505.2405 | AGTFAGA  | 548.2827 | 576.2776 | AGTFAGAD | 663.3097 | 691.3046 |
| GT       | 131.0815 | 159.0764 | GTF      | 278.1499 | 306.1448 | GTFAG    | 349.1870 | 377.1819 |
| GTFAG    | 406.2085 | 434.2034 | GTFAGA   | 477.2456 | 505.2405 | GTFAGAD  | 592.2726 | 620.2675 |
| GTFAGADG | 649.2940 | 677.2889 | TF       | 221.1285 | 249.1234 | TFA      | 292.1656 | 320.1605 |
| TFAG     | 349.1870 | 377.1819 | TFAGA    | 420.2241 | 448.2191 | TFAGAD   | 535.2511 | 563.2460 |
| TFAGADG  | 592.2726 | 620.2675 | TFAGADGS | 679.3046 | 707.2995 | FA       | 191.1179 | 219.1128 |
| FAG      | 248.1394 | 276.1343 | FAGA     | 319.1765 | 347.1714 | FAGAD    | 434.2034 | 462.1983 |
| FAGADG   | 491.2249 | 519.2198 | FAGADGS  | 578.2569 | 606.2518 | AG       | 101.0709 | 129.0659 |
| AGA      | 172.1081 | 200.1030 | AGAD     | 287.1350 | 315.1299 | AGADG    | 344.1565 | 372.1514 |
| AGADGS   | 431.1885 | 459.1834 | GA       | 101.0709 | 129.0659 | GAD      | 216.0979 | 244.0928 |
| GADG     | 273.1193 | 301.1143 | GADGS    | 360.1514 | 388.1463 | AD       | 159.0764 | 187.0713 |
| ADG      | 216.0979 | 244.0928 | ADGS     | 303.1299 | 331.1248 | DG       | 145.0608 | 173.0557 |
| DGS      | 232.0928 | 260.0877 | GS       | 117.0659 | 145.0608 |          |          |          |

Spot No.: **45**

Mascot score: **148**

Species: *Fusarium oxysporum Fo5176*

Protein name: **protein disulfide-isomerase tigA precursor**

NCBI accession No.: **gi| 342876003**      Sequence coverage %: **60**

Matched peptides No.: **21**      Total peptides No.: **81**

Calculated Mr: **44513**      Calculated pI: **5.77**

### Annotated PMF spectra:

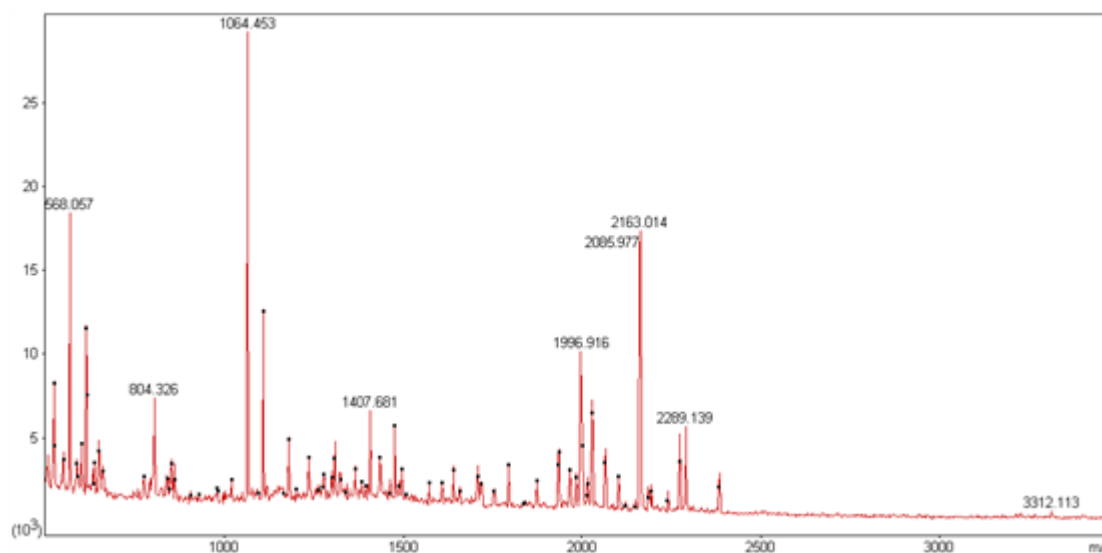

### Probability Based Mowse Score:

Protein score is  $-10 \cdot \log(P)$ , where P is the probability that the observed match is a random event. Protein scores greater than 75 are significant ( $p < 0.05$ ).

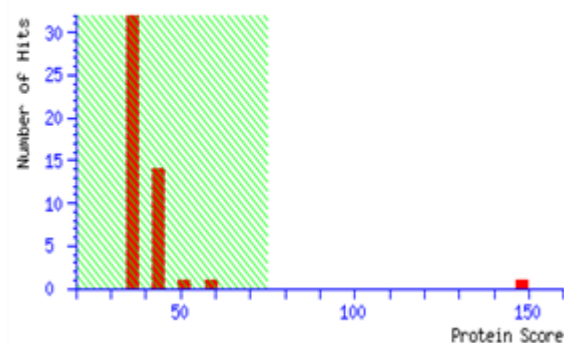

## Matched peptide sequences: shown in **Bold Red**

1 MVLIKSFVLS **ALAAATVAAKS AVIELLPSNF DDIVLKSGKP TLVEFFAPWC**  
 51 **GHCKTLAPVW EDLANTYEYA KDKVQIAKVD ADAQRELGKR FGIQGFPTLK**  
 101 **FFDGKSSKPQ DYKSGRDLES LTNFIVEKTG VKPKKKLELP SEVTYLNDAT**  
 151 **FPKAIGGDKH VLVAFTAPWC GHCKSLAPTW EDLANTFVNE KNVLIAKVDA**  
 201 **EAPNSKAVAE EQGVKSYPTI KWFPAGSKKA VAYESGRSEQ AFVDWINEHA**  
 251 **GTHRVTGGGL DTVAGTVESL DTLVAKITGG AAIADVAEEV KKEVETLTD**  
 301 **AQKTYAEYYV RVFDKLSNN DWVSKELARL DGILTKGGLA PAKRDQIQK**  
 351 TNVLRKFTQK VEEKVEEIKD EL

## Matched peptides information:

| Start | End | Observed  | Mr(expt)  | Mr(cale)  | ppm   | M | Peptide                    |
|-------|-----|-----------|-----------|-----------|-------|---|----------------------------|
| 20    | 36  | 1872.9733 | 1871.9660 | 1872.0244 | -31.2 | 0 | K.SAVIELLPSNFDDIVLK.S      |
| 37    | 54  | 2120.9629 | 2119.9556 | 2119.9972 | -19.6 | 0 | K.SGKPTLVEFFAPMCGHCK.T     |
| 55    | 71  | 1983.8875 | 1982.8802 | 1982.9625 | -41.5 | 0 | K.TLAPVWEDLANTYEVAK.D      |
| 79    | 85  | 774.3139  | 773.3066  | 773.3668  | -77.8 | 0 | K.VDADAQR.E                |
| 79    | 89  | 1201.5342 | 1200.5269 | 1200.6098 | -69.1 | 1 | K.VDADAQRELQK.R            |
| 90    | 100 | 1263.6246 | 1262.6173 | 1262.7135 | -76.2 | 1 | K.RFGIQGFPTLK.F            |
| 91    | 100 | 1107.5455 | 1106.5382 | 1106.6124 | -67.1 | 0 | R.FGIQGFPTLK.F             |
| 101   | 105 | 613.2265  | 612.2192  | 612.2908  | -117  | 0 | K.FFDGK.S                  |
| 114   | 128 | 1707.7616 | 1706.7543 | 1706.8839 | -75.9 | 1 | K.SGRDLESLTNFIVEK.T        |
| 117   | 128 | 1407.6812 | 1406.6739 | 1406.7293 | -39.4 | 0 | R.DLESLTNFIVEK.T           |
| 136   | 153 | 2065.0480 | 2064.0407 | 2064.0779 | -18.0 | 1 | K.KLELPSEVTYLNDATFPK.A     |
| 137   | 153 | 1936.9603 | 1935.9530 | 1935.9829 | -15.5 | 0 | K.LELPSEVTYLNDATFPK.A      |
| 175   | 191 | 1934.8967 | 1933.8894 | 1933.9421 | -27.3 | 0 | K.SLAPTWEDLANTFVNEK.N      |
| 198   | 206 | 930.3850  | 929.3778  | 929.4454  | -72.8 | 0 | K.VDAEAPNSK.A              |
| 229   | 237 | 980.4152  | 979.4079  | 979.5087  | -103  | 1 | K.KAVAYESGR.S              |
| 230   | 237 | 852.3518  | 851.3445  | 851.4137  | -81.3 | 0 | K.AVAYESGR.S               |
| 238   | 254 | 1996.9164 | 1995.9091 | 1995.9187 | -4.81 | 0 | R.SEQAFVDWINEHAQTHR.V      |
| 255   | 276 | 2103.0571 | 2102.0498 | 2102.1107 | -29.0 | 0 | R.VTGGOLDTVAGTVESLDTLVAK.I |
| 277   | 292 | 1571.8090 | 1570.8017 | 1570.8566 | -34.9 | 1 | K.ITGGAAIADVAEEVKK.E       |
| 304   | 311 | 1064.4527 | 1063.4454 | 1063.4974 | -48.9 | 0 | K.TYAEYYVR.V               |
| 312   | 325 | 1638.8045 | 1637.7972 | 1637.8049 | -4.71 | 1 | R.VFDKLSNNIDWVSK.E         |

Spot No.: **46**

Mascot score: **168**

Species: *Fusarium oxysporum f. sp. cubense race 4*

Protein name: **ATP synthase subunit beta, mitochondrial**

NCBI accession No.: **gi| 475664589**      Sequence coverage %: **68**

Matched peptides No.: **28**      Total peptides No.: **71**

Calculated Mr: **55197**      Calculated pI: **5.27**

### Annotated PMF spectra:

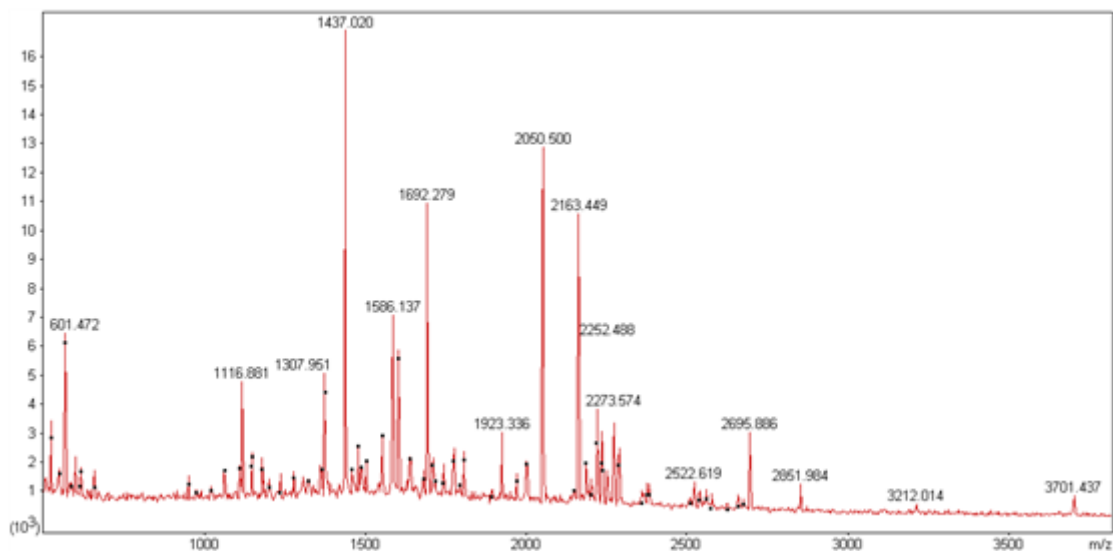

### Probability Based Mowse Score:

Protein score is  $-10 \cdot \log(P)$ , where P is the probability that the observed match is a random event. Protein scores greater than 75 are significant ( $p < 0.05$ ).

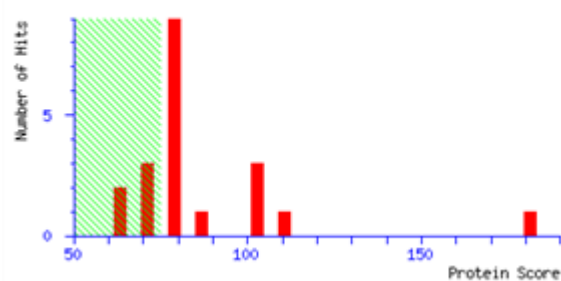

Matched peptide sequences: shown in **Bold Red**

```

1  MFKSGISSFA RAARPAVLPR RALRPSSLRL PISSRWASTA SVGTGKIHQV
51  IGAVVDVKFD TQKLPAILNS LETENNGQKL VLEVSQHLGE NVVRCIAMDG
101  TEGLVRGASA QDTGAPITIP VGPATLGRIM NVTGDPIDER GPIKTDKRLP
151  IHTEAPEFVE QSTSAEVLVT GIKVVDLLAP YARGGKIGLF GGAGVGKTVF
201  IQELINNIK AHGGYSVFTG VGERTREGND LYHEMQETSV IQLDGESKVA
251  LVFGQMNEPP GARARVALTG LTVAEYFRDE EGQDVLLFID NIFRFTQAGS
301  EVSALLGRIP SAVGYQPTLA VDMGGMQERI TTTTKGSITS VQAVVYPADD
351  LTDPAPATTF AHLDATTVLS RGISELGIYP AVDPLDSKSR MLDPRVVGQE
401  HYDVATRQQ ILQEYKSLQD IIAILGMDL SEADKLTVER ARKIQRFLSQ
451  PFTVAQVFTG IEGKLVLDKE TINSFKAILN GEGDNLPEGA FYMVGDFASA
501  KAKGEKILAE LEGQ

```

Matched peptides information:

| Start | End   | Observed  | Ms (expt) | Ms (calc) | ppm   | zI | Peptide                                   |
|-------|-------|-----------|-----------|-----------|-------|----|-------------------------------------------|
| 47    | - 58  | 1277.9769 | 1276.9696 | 1276.7503 | 172   | 0  | K.IHQVIGAVVDVK.F                          |
| 59    | - 79  | 2360.6399 | 2359.6326 | 2359.2019 | 163   | 1  | K.FDTQLRAILNSLETENNGQK.L                  |
| 64    | - 79  | 1741.1681 | 1740.1608 | 1739.9053 | 147   | 0  | K.LRAILNSLETENNGQK.L                      |
| 80    | - 94  | 1692.2787 | 1691.2714 | 1690.9268 | 198   | 0  | K.VLEVSQHLGEVVS.C                         |
| 95    | - 106 | 1321.9203 | 1320.9130 | 1320.6168 | 224   | 0  | R.CIANQDTEGLYR.G                          |
| 107   | - 129 | 2090.5003 | 2049.4930 | 2049.0855 | 199   | 0  | R.GASQDTGAPITIPGATLGR.I                   |
| 148   | - 173 | 2881.9845 | 2880.9772 | 2880.5127 | 163   | 1  | K.RLPIHTEAPEFVEQSTSAEVLVTOIK.V            |
| 169   | - 173 | 2695.8861 | 2694.8788 | 2694.4116 | 173   | 0  | R.LPIHTEAPEFVEQSTSAEVLVTOIK.V             |
| 174   | - 183 | 1116.8009 | 1115.8736 | 1115.6339 | 215   | 0  | K.VYDILAPYAR.G                            |
| 187   | - 197 | 975.7881  | 974.7808  | 974.5549  | 232   | 0  | K.DULFGQAVQK.Y                            |
| 198   | - 210 | 1802.0998 | 1802.0925 | 1801.8504 | 161   | 0  | K.TYIIEELINNIK.A                          |
| 211   | - 224 | 1437.0200 | 1436.0127 | 1435.6844 | 229   | 0  | K.AHGQYSVFTVQYR.T                         |
| 227   | - 248 | 2822.6193 | 2821.6120 | 2821.1278 | 192   | 0  | R.ESDLYHEIQETSYIQLDGEEK.V                 |
| 227   | - 248 | 2838.6523 | 2837.6450 | 2837.1228 | 206   | 0  | R.ESDLYHEIQETSYIQLDGEEK.V + Oxidation (O) |
| 249   | - 263 | 1886.1365 | 1885.1292 | 1884.8082 | 203   | 0  | K.VALVYQGMSEPPGAR.A                       |
| 249   | - 263 | 1602.0982 | 1601.0909 | 1600.8032 | 180   | 0  | K.VALVYQGMSEPPGAR.A + Oxidation (O)       |
| 279   | - 294 | 1923.3359 | 1922.3285 | 1921.9422 | 201   | 0  | R.DEEQGVLLFIDNIK.F                        |
| 309   | - 329 | 2220.4822 | 2219.4749 | 2219.0715 | 182   | 0  | R.IPSAVYQPTLAVDMSQYR.I                    |
| 309   | - 329 | 2236.4704 | 2235.4631 | 2235.0664 | 178   | 0  | R.IPSAVYQPTLAVDMSQYR.I + Oxidation (O)    |
| 309   | - 329 | 2252.4893 | 2251.4819 | 2251.0453 | 186   | 0  | R.IPSAVYQPTLAVDMSQYR.I + 2 Oxidation (O)  |
| 336   | - 371 | 3701.4373 | 3700.4300 | 3699.8632 | 153   | 0  | K.GSITVQAVYVYFADLTPAPATTFARLHLDATTVLSR.G  |
| 372   | - 388 | 1774.2213 | 1773.2140 | 1772.9198 | 166   | 0  | R.GISELGIYFVDPLSK.S                       |
| 396   | - 407 | 1373.9492 | 1372.9419 | 1372.6739 | 196   | 0  | R.VYQDHYDVATR.V                           |
| 408   | - 416 | 1149.8914 | 1147.8841 | 1147.6237 | 192   | 0  | R.YQQLQEK.S                               |
| 417   | - 440 | 2659.0357 | 2658.0284 | 2658.3786 | 169   | 1  | K.SLQDIILGDELSEADKLTVER.A                 |
| 417   | - 440 | 2675.0670 | 2674.7997 | 2674.3739 | 159   | 1  | K.SLQDIILGDELSEADKLTVER.A + Oxidation (O) |
| 447   | - 464 | 1969.3909 | 1968.3832 | 1968.0387 | 177   | 0  | R.FLSQPTVAVVTOIEK.L                       |
| 465   | - 489 | 887.3447  | 886.3374  | 886.3690  | -53.9 | 0  | K.LYDLK.E                                 |

Spot No.: **47**

Mascot score: **81**

Species: *Laccaria bicolor S238N-H82*

Protein name: **ubiquitin**

NCBI accession No.: **gi| 170098594**      Sequence coverage %: **84**

Matched peptides No.: **7**      Total peptides No.: **61**

Calculated Mr: **8152**      Calculated pI: **5.71**

### Annotated PMF spectra:

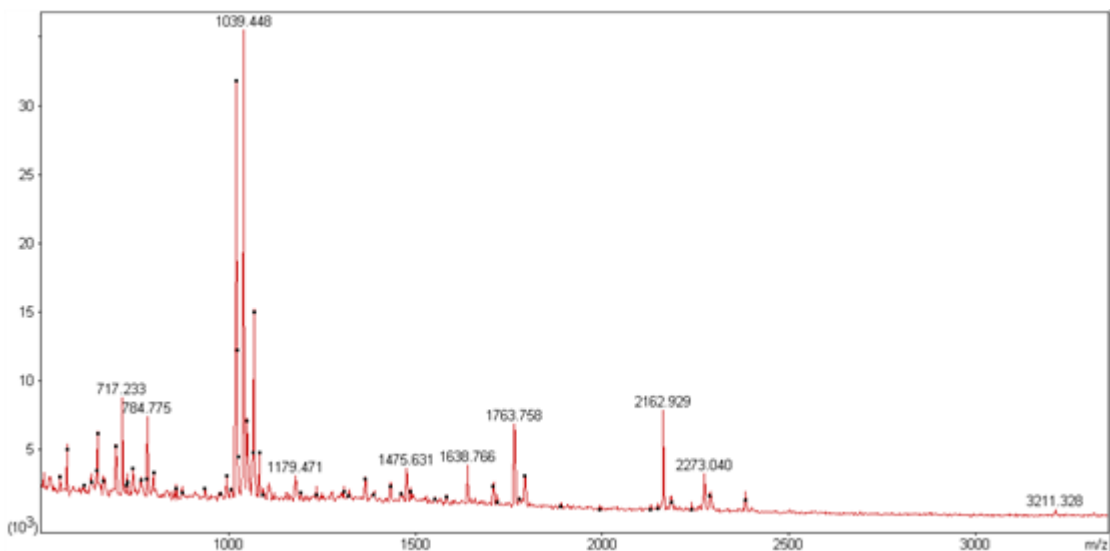

### Probability Based Mowse Score:

Protein score is  $-10 \cdot \log(P)$ , where P is the probability that the observed match is a random event. Protein scores greater than 75 are significant ( $p < 0.05$ ).

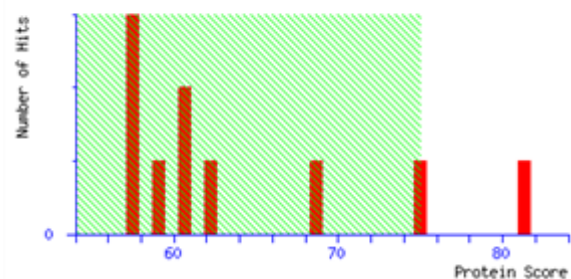

Matched peptide sequences: shown in **Bold Red**

**1 MQIFVKILTG KTITLEVESS DTIDNVKAKI QDKEGIPPDQ QRLIFAGKQL**  
**51 EDGRTLSDYN IQKESTLHLV LR**

Matched peptides information:

| Start | End | Observed  | Mr (expt) | Mr (calc) | ppm   | M | Peptide              |
|-------|-----|-----------|-----------|-----------|-------|---|----------------------|
| 1     | 6   | 765.3025  | 764.2952  | 764.4255  | -170  | 0 | -MQIFVK.T            |
| 12    | 27  | 1763.7576 | 1762.7503 | 1762.8836 | -75.6 | 0 | K.TITLEVESSDTIDNVK.A |
| 34    | 42  | 1039.4483 | 1038.4410 | 1038.5094 | -65.9 | 0 | K.EGIPPDQR.L         |
| 43    | 48  | 648.2649  | 647.2576  | 647.4006  | -221  | 0 | R.LIFAGK.Q           |
| 49    | 54  | 717.2329  | 716.2256  | 716.3453  | -167  | 0 | K.QLEDGR.T           |
| 55    | 63  | 1081.4277 | 1080.4204 | 1080.5451 | -115  | 0 | R.TLSDYNIQK.E        |
| 64    | 72  | 1067.5175 | 1066.5102 | 1066.6135 | -96.8 | 0 | K.ESTLHLVLR.-        |

Spot No.: **48**

NCBI accession No.: **gi/342873137**

Plant species: ***Verticillium dahliae* VdLs.17**

Protein name: **nuclear transport factor 2**

Mascot score: **166**

Sequence coverage %: **12**

The number of matched peptides with  $p \leq 0.05$ : **2**

Calculated Mr: **13980**

Calculated Pi: **4.61**

### Annotated MS spectra:

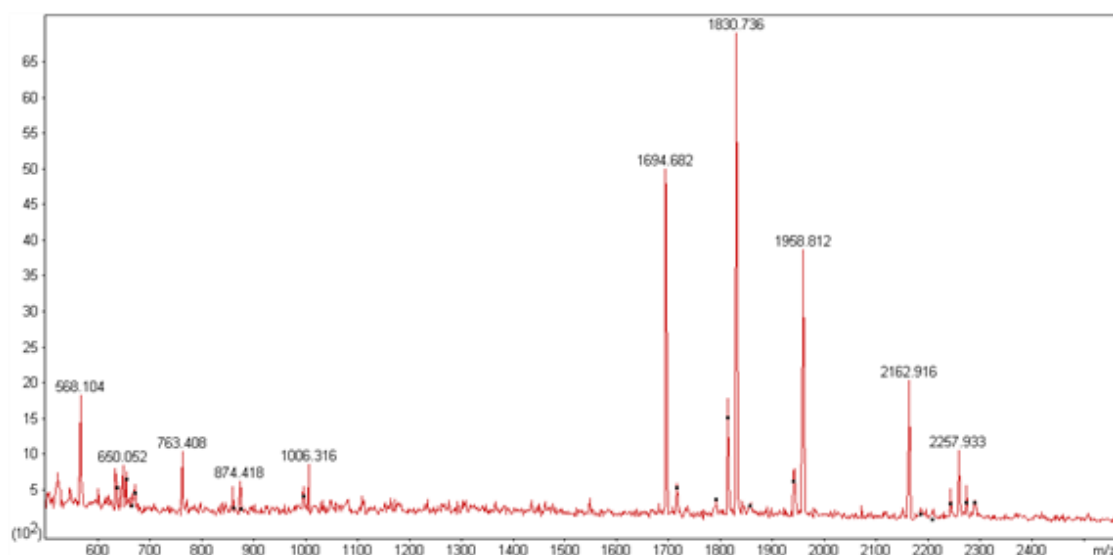

### Probability Based Mowse Score:

Ions score is  $-10 \cdot \log(P)$ , where P is the probability that the observed match is a random event. Individual ions scores  $> 47$  indicate identity or extensive homology ( $p < 0.05$ ). Protein scores are derived from ions scores as a non-probabilistic basis for ranking protein hits.

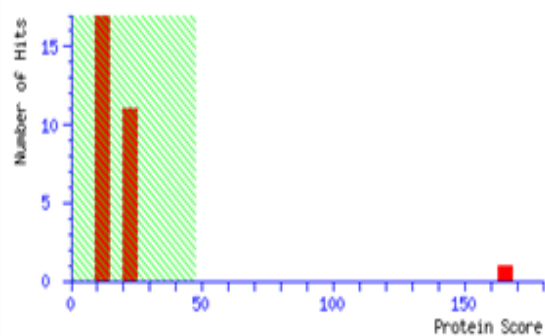

Matched peptide sequences: shown in **Bold Red**



1 MAGNFEEVAK QFVEFYNTF DSDRKGLAAL YRDNMMLTFE SASVLGTQAI  
 51 TEKLAGLPFE KVKHQVSTLD AQPNDQGGV IILITGALLV DEEQRPMNFS  
 101 QSFQLARDAN GQYFVYNDIF KLVFG

Matched peptides information:

| Query | Start - End | Observed  | Mr(expt)  | Mr(calcd) | ppm   | M | Score | Expect  | Rank | U | Peptide          |
|-------|-------------|-----------|-----------|-----------|-------|---|-------|---------|------|---|------------------|
| 1     | 11 - 24     | 1830.7360 | 1829.7287 | 1829.7897 | -33.3 | 0 | 80    | 2.6e-05 | 1    | 0 | K.QFVEFYNTFDSR.K |
| 1     | 11 - 25     | 1958.8120 | 1957.6047 | 1957.8846 | -40.8 | 1 | 86    | 7.3e-06 | 1    | 0 | K.QFVEFYNTFDSR.G |

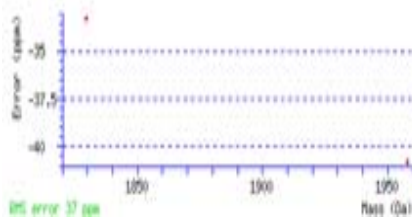

# Annotated ion spectra of the matched peptides with $p \leq 0.05$ :

CID No.: **48-1830.7**

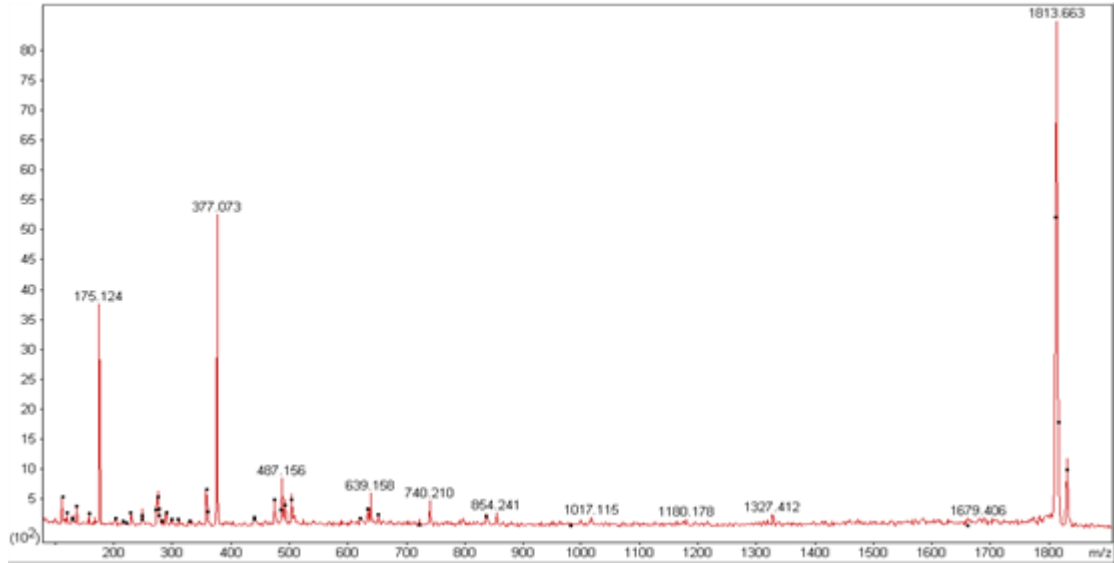

## MS/MS Fragmentation of **K.QFVEFYNTFSDR.K**

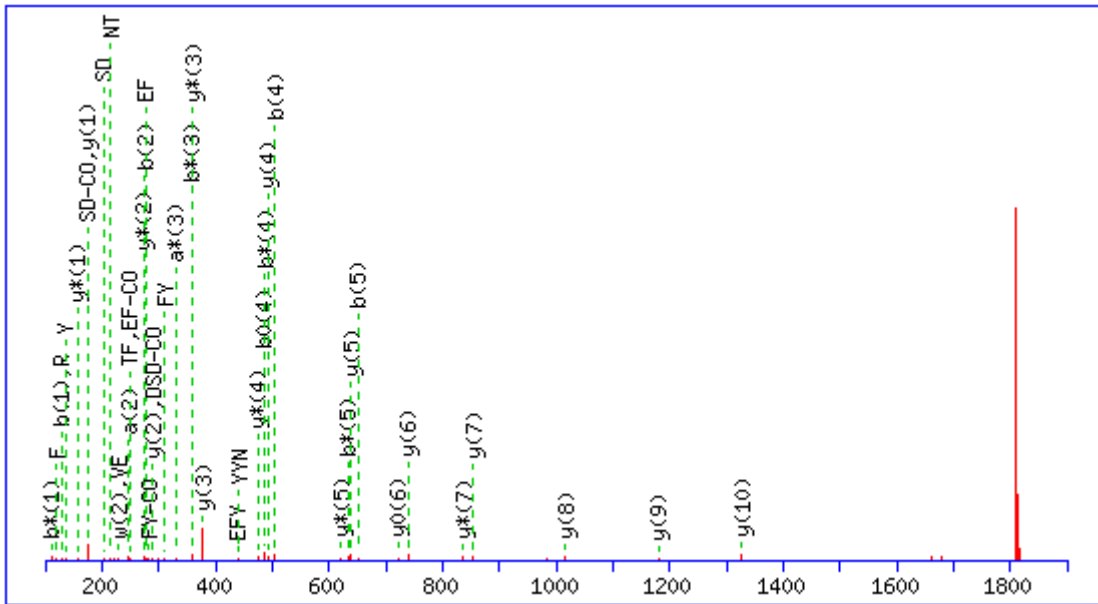

Monoisotopic mass of neutral peptide  $M_r(\text{calc})$ : 1829.7897

| #  | Immon.   | a         | a*        | a <sup>0</sup> | b         | b*        | b <sup>0</sup> | d         | d'        | Seq. | v         | w         | w'       | y         | y*        | y <sup>0</sup> | #  |
|----|----------|-----------|-----------|----------------|-----------|-----------|----------------|-----------|-----------|------|-----------|-----------|----------|-----------|-----------|----------------|----|
| 1  | 101.0709 | 101.0709  | 84.0444   |                | 129.0659  | 112.0393  |                | 44.0495   |           | Q    |           |           |          |           |           |                | 14 |
| 2  | 120.0808 | 248.1394  | 231.1128  |                | 276.1343  | 259.1077  |                |           |           | F    | 1610.6758 |           |          | 1702.7384 | 1685.7118 | 1684.7278      | 13 |
| 3  | 72.0808  | 347.2078  | 330.1812  |                | 375.2027  | 358.1761  |                | 333.1921  |           | V    | 1511.6074 | 1524.6278 |          | 1555.6700 | 1538.6434 | 1537.6594      | 12 |
| 4  | 102.0550 | 476.2504  | 459.2238  | 458.2398       | 504.2453  | 487.2187  | 486.2347       | 418.2449  |           | E    | 1382.5648 | 1381.5695 |          | 1456.6016 | 1439.5750 | 1438.5910      | 11 |
| 5  | 120.0808 | 623.3188  | 606.2922  | 605.3082       | 651.3137  | 634.2871  | 633.3031       |           |           | F    | 1235.4964 |           |          | 1327.5590 | 1310.5324 | 1309.5484      | 10 |
| 6  | 136.0757 | 786.3821  | 769.3556  | 768.3715       | 814.3770  | 797.3505  | 796.3665       |           |           | Y    | 1072.4330 |           |          | 1180.4905 | 1163.4640 | 1162.4800      | 9  |
| 7  | 136.0757 | 949.4454  | 932.4189  | 931.4349       | 977.4403  | 960.4138  | 959.4298       |           |           | Y    | 909.3697  |           |          | 1017.4272 | 1000.4007 | 999.4167       | 8  |
| 8  | 87.0553  | 1063.4884 | 1046.4618 | 1045.4778      | 1091.4833 | 1074.4567 | 1073.4727      | 1020.4825 |           | N    | 795.3268  | 794.3315  |          | 854.3639  | 837.3373  | 836.3533       | 7  |
| 9  | 74.0600  | 1164.5360 | 1147.5095 | 1146.5255      | 1192.5310 | 1175.5044 | 1174.5204      | 1148.5411 | 1150.5204 | T    | 694.2791  | 707.2995  | 709.2788 | 740.3210  | 723.2944  | 722.3104       | 6  |
| 10 | 120.0808 | 1311.6045 | 1294.5779 | 1293.5939      | 1339.5994 | 1322.5728 | 1321.5888      |           |           | F    | 547.2107  |           |          | 639.2733  | 622.2467  | 621.2627       | 5  |
| 11 | 88.0393  | 1426.6314 | 1409.6048 | 1408.6208      | 1454.6263 | 1437.5998 | 1436.6157      | 1382.6416 |           | D    | 432.1837  | 431.1885  |          | 492.2049  | 475.1783  | 474.1943       | 4  |
| 12 | 60.0444  | 1513.6634 | 1496.6369 | 1495.6529      | 1541.6583 | 1524.6318 | 1523.6478      | 1497.6685 |           | S    | 345.1517  | 344.1565  |          | 377.1779  | 360.1514  | 359.1674       | 3  |
| 13 | 88.0393  | 1628.6904 | 1611.6638 | 1610.6798      | 1656.6853 | 1639.6587 | 1638.6747      | 1584.7005 |           | D    | 230.1248  | 229.1295  |          | 290.1459  | 273.1193  | 272.1353       | 2  |
| 14 | 129.1135 |           |           |                |           |           |                |           |           | R    | 74.0237   | 73.0284   |          | 175.1190  | 158.0924  |                | 1  |

| Seq          | ya              | yb              | Seq           | ya              | yb              | Seq          | ya              | yb              |
|--------------|-----------------|-----------------|---------------|-----------------|-----------------|--------------|-----------------|-----------------|
| <b>FV</b>    | 219.1492        | 247.1441        | <b>FVE</b>    | 348.1918        | 376.1867        | <b>FVEF</b>  | 495.2602        | 523.2551        |
| <b>FVEFY</b> | 658.3235        | 686.3184        | <b>VE</b>     | 201.1234        | <b>229.1183</b> | <b>VEF</b>   | 348.1918        | 376.1867        |
| <b>VEFY</b>  | 511.2551        | 539.2500        | <b>VEFY</b>   | 674.3184        | 702.3134        | <b>EF</b>    | <b>249.1234</b> | <b>277.1183</b> |
| <b>EFY</b>   | 412.1867        | <b>440.1816</b> | <b>EFYY</b>   | 575.2500        | 603.2449        | <b>EFYYN</b> | 689.2930        | 717.2879        |
| <b>FY</b>    | <b>283.1441</b> | <b>311.1390</b> | <b>FYY</b>    | 446.2074        | 474.2023        | <b>FYYN</b>  | 560.2504        | 588.2453        |
| <b>FYYNT</b> | 661.2980        | 689.2930        | <b>YY</b>     | 299.1390        | 327.1339        | <b>YYN</b>   | 413.1819        | <b>441.1769</b> |
| <b>YYNT</b>  | 514.2296        | 542.2245        | <b>YYNTF</b>  | 661.2980        | 689.2930        | <b>YN</b>    | 250.1186        | 278.1135        |
| <b>YNT</b>   | 351.1663        | 379.1612        | <b>YNTF</b>   | 498.2347        | 526.2296        | <b>YNTFD</b> | 613.2617        | 641.2566        |
| <b>NT</b>    | 188.1030        | <b>216.0979</b> | <b>NTF</b>    | 335.1714        | 363.1663        | <b>NTFD</b>  | 450.1983        | 478.1932        |
| <b>NTFDS</b> | 537.2304        | 565.2253        | <b>NTFDSD</b> | 652.2573        | 680.2522        | <b>TF</b>    | 221.1285        | <b>249.1234</b> |
| <b>TFD</b>   | 336.1554        | 364.1503        | <b>TFDS</b>   | 423.1874        | 451.1823        | <b>TFDSD</b> | 538.2144        | 566.2093        |
| <b>FD</b>    | 235.1077        | 263.1026        | <b>FDS</b>    | 322.1397        | 350.1347        | <b>FDS</b>   | 437.1667        | 465.1616        |
| <b>DS</b>    | <b>175.0713</b> | <b>203.0662</b> | <b>DSD</b>    | <b>290.0983</b> | 318.0932        | <b>SD</b>    | <b>175.0713</b> | <b>203.0662</b> |

# Annotated ion spectra of the matched peptides with $p \leq 0.05$ :

CID No.: **48-1958.8**

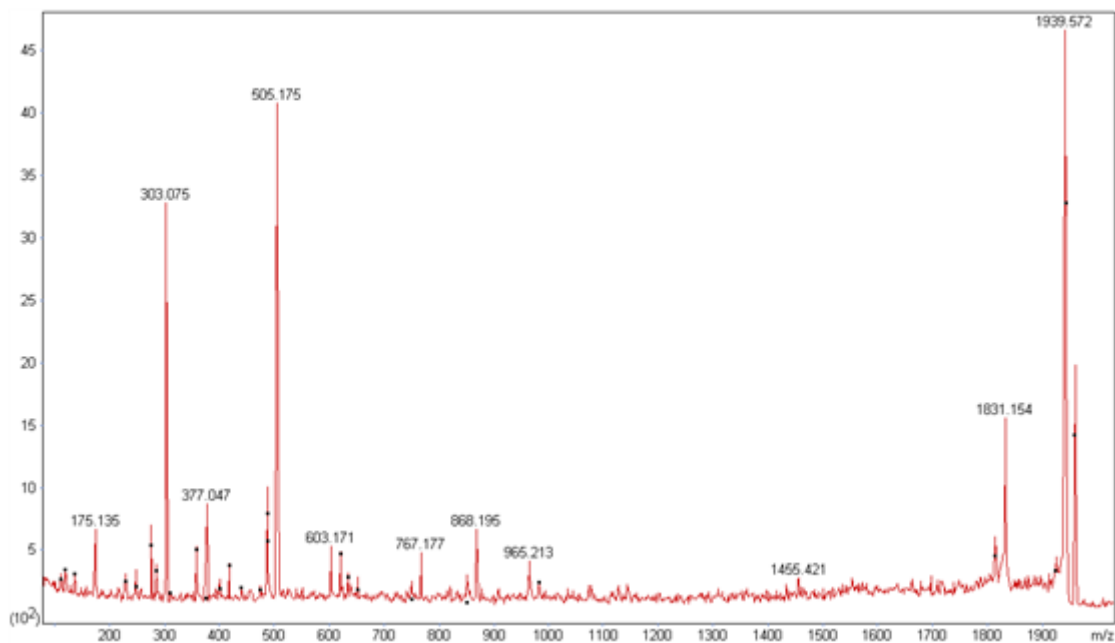

## MS/MS Fragmentation of **K.QFVEFYNTFDSDRK.G**

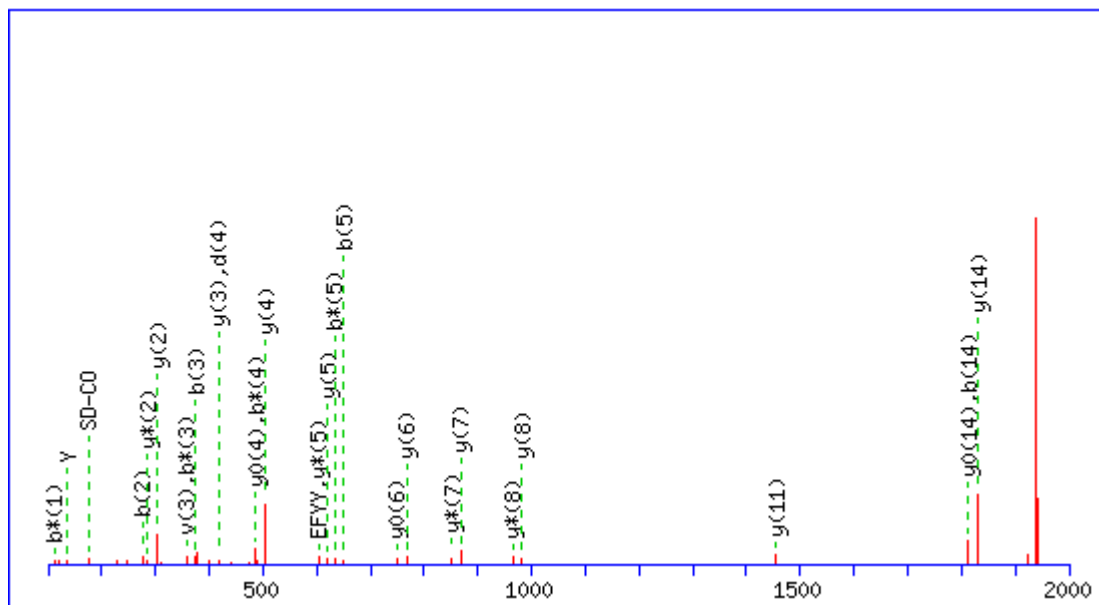

Monoisotopic mass of neutral peptide  $M_r(\text{calc})$ : 1957.8846

| #  | Immon.   | a         | a*        | a <sup>0</sup> | b         | b*        | b <sup>0</sup> | d         | d'        | Seq. | v         | w         | w'       | y         | y*        | y <sup>0</sup> | #  |
|----|----------|-----------|-----------|----------------|-----------|-----------|----------------|-----------|-----------|------|-----------|-----------|----------|-----------|-----------|----------------|----|
| 1  | 101.0709 | 101.0709  | 84.0444   |                | 129.0659  | 112.0393  |                | 44.0495   |           | Q    |           |           |          |           |           |                | 15 |
| 2  | 120.0808 | 248.1394  | 231.1128  |                | 276.1343  | 259.1077  |                |           |           | F    | 1738.7707 |           |          | 1830.8333 | 1813.8068 | 1812.8228      | 14 |
| 3  | 72.0808  | 347.2078  | 330.1812  |                | 375.2027  | 358.1761  |                | 333.1921  |           | V    | 1639.7023 | 1652.7227 |          | 1683.7649 | 1666.7384 | 1665.7544      | 13 |
| 4  | 102.0550 | 476.2504  | 459.2238  | 458.2398       | 504.2453  | 487.2187  | 486.2347       | 418.2449  |           | E    | 1510.6597 | 1509.6645 |          | 1584.6965 | 1567.6700 | 1566.6859      | 12 |
| 5  | 120.0808 | 623.3188  | 606.2922  | 605.3082       | 651.3137  | 634.2871  | 633.3031       |           |           | F    | 1363.5913 |           |          | 1455.6539 | 1438.6274 | 1437.6434      | 11 |
| 6  | 136.0757 | 786.3821  | 769.3556  | 768.3715       | 814.3770  | 797.3505  | 796.3665       |           |           | Y    | 1200.5280 |           |          | 1308.5855 | 1291.5590 | 1290.5749      | 10 |
| 7  | 136.0757 | 949.4454  | 932.4189  | 931.4349       | 977.4403  | 960.4138  | 959.4298       |           |           | Y    | 1037.4647 |           |          | 1145.5222 | 1128.4956 | 1127.5116      | 9  |
| 8  | 87.0553  | 1063.4884 | 1046.4618 | 1045.4778      | 1091.4833 | 1074.4567 | 1073.4727      | 1020.4825 |           | N    | 923.4217  | 922.4265  |          | 982.4588  | 965.4323  | 964.4483       | 8  |
| 9  | 74.0600  | 1164.5360 | 1147.5095 | 1146.5255      | 1192.5310 | 1175.5044 | 1174.5204      | 1148.5411 | 1150.5204 | T    | 822.3741  | 835.3945  | 837.3737 | 868.4159  | 851.3894  | 850.4054       | 7  |
| 10 | 120.0808 | 1311.6045 | 1294.5779 | 1293.5939      | 1339.5994 | 1322.5728 | 1321.5888      |           |           | F    | 675.3056  |           |          | 767.3682  | 750.3417  | 749.3577       | 6  |
| 11 | 88.0393  | 1426.6314 | 1409.6048 | 1408.6208      | 1454.6263 | 1437.5998 | 1436.6157      | 1382.6416 |           | D    | 560.2787  | 559.2835  |          | 620.2998  | 603.2733  | 602.2893       | 5  |
| 12 | 60.0444  | 1513.6634 | 1496.6369 | 1495.6529      | 1541.6583 | 1524.6318 | 1523.6478      | 1497.6685 |           | S    | 473.2467  | 472.2514  |          | 505.2729  | 488.2463  | 487.2623       | 4  |
| 13 | 88.0393  | 1628.6904 | 1611.6638 | 1610.6798      | 1656.6853 | 1639.6587 | 1638.6747      | 1584.7005 |           | D    | 358.2197  | 357.2245  |          | 418.2409  | 401.2143  | 400.2303       | 3  |
| 14 | 129.1135 | 1784.7915 | 1767.7649 | 1766.7809      | 1812.7864 | 1795.7598 | 1794.7758      | 1699.7275 |           | R    | 202.1186  | 201.1234  |          | 303.2139  | 286.1874  |                | 2  |
| 15 | 101.1073 |           |           |                |           |           |                |           |           | K    | 74.0237   | 73.0284   |          | 147.1128  | 130.0863  |                | 1  |

| Seq   | ya       | yb       | Seq   | ya       | yb       | Seq   | ya       | yb       |
|-------|----------|----------|-------|----------|----------|-------|----------|----------|
| FV    | 219.1492 | 247.1441 | FVE   | 348.1918 | 376.1867 | FVEF  | 495.2602 | 523.2551 |
| FVEFY | 658.3235 | 686.3184 | VE    | 201.1234 | 229.1183 | VEF   | 348.1918 | 376.1867 |
| VEFY  | 511.2551 | 539.2500 | VEFY  | 674.3184 | 702.3134 | EF    | 249.1234 | 277.1183 |
| EFY   | 412.1867 | 440.1816 | EFY   | 575.2500 | 603.2449 | EFYFN | 689.2930 | 717.2879 |
| FY    | 283.1441 | 311.1390 | FY    | 446.2074 | 474.2023 | FYFN  | 560.2504 | 588.2453 |
| FYFNT | 661.2980 | 689.2930 | YY    | 299.1390 | 327.1339 | YYN   | 413.1819 | 441.1769 |
| YYNT  | 514.2296 | 542.2245 | YYNTF | 661.2980 | 689.2930 | YN    | 250.1186 | 278.1135 |
| YNT   | 351.1663 | 379.1612 | YNTF  | 498.2347 | 526.2296 | YNTFD | 613.2617 | 641.2566 |
| NT    | 188.1030 | 216.0979 | NTF   | 335.1714 | 363.1663 | NTFD  | 450.1983 | 478.1932 |
| NTFDS | 537.2304 | 565.2253 | NTFDS | 652.2573 | 680.2522 | TF    | 221.1285 | 249.1234 |
| TFD   | 336.1554 | 364.1503 | TFDS  | 423.1874 | 451.1823 | TFDS  | 538.2144 | 566.2093 |
| TFDS  | 694.3155 | 722.3104 | FD    | 235.1077 | 263.1026 | FDS   | 322.1397 | 350.1347 |
| FDS   | 437.1667 | 465.1616 | FDS   | 593.2678 | 621.2627 | DS    | 175.0713 | 203.0662 |
| DSD   | 290.0983 | 318.0932 | DSD   | 446.1994 | 474.1943 | SD    | 175.0713 | 203.0662 |
| SDR   | 331.1724 | 359.1674 | DR    | 244.1404 | 272.1353 |       |          |          |

Spot No.: **49**

NCBI accession No.: **gi|475664589**

Plant species: ***Fusarium oxysporum f. sp. cubense race 4***

Protein name: **ATP synthase subunit beta, mitochondrial**

Mascot score: **117**                      Sequence coverage %: **5**

The number of matched peptides with  $p \leq 0.05$ : **2**

Calculated Mr: **41859**                      Calculated Pi: **4.74**

### Annotated MS spectra:

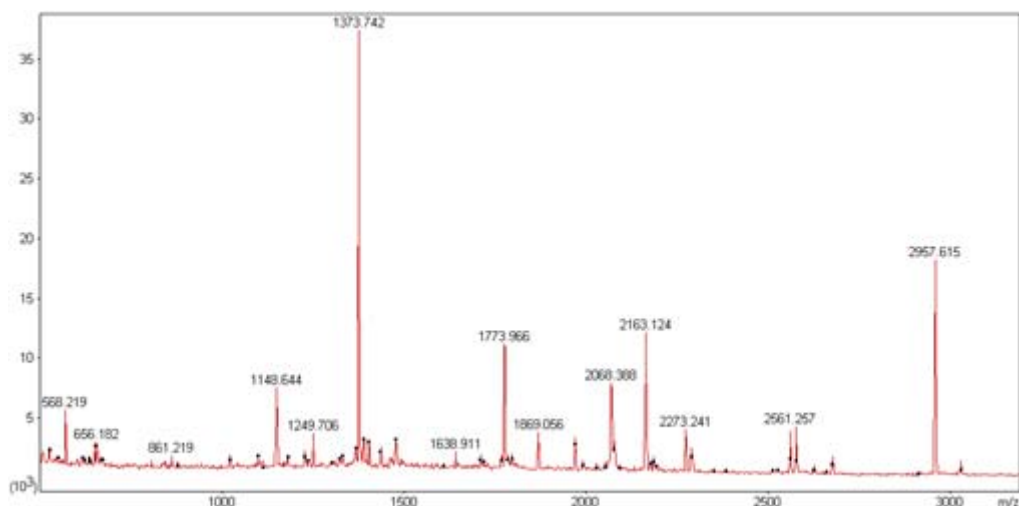

### Probability Based Mowse Score:

Ions score is  $-10 \cdot \log(P)$ , where P is the probability that the observed match is a random event. Individual ions scores  $> 47$  indicate identity or extensive homology ( $p < 0.05$ ). Protein scores are derived from ions scores as a non-probabilistic basis for ranking protein hits.

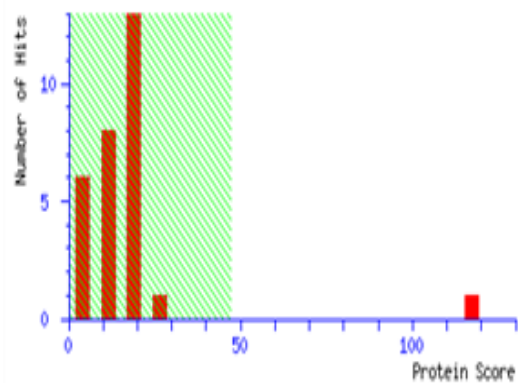

Matched peptide sequences: shown in **Bold Red**

```

1 MLSTSGSLIF DIDVEFKTDK RLPITTEAPE FVEQSTSAEV LVTGIKVVVDL
51 LAPYARGGKI GLFGGAGVGK TVFIQELINN IAKAHGGYSV FIGVGERTRE
101 GNDLYHEMQE TSVIQLDGES KVALVFGQMN EPPGARARVA LTGLTVAEYF
151 RDEEGQDVLL FIDNIFRFTQ AGSEVSALLG RIPSAVGYQP TLAVDMGGMQ
201 ERITTTTKGS ITSVQAVYVP ADDLTDPAFA TTF AHLDATT VLSRGISELG
251 IYPAVDPLDS KSRMLDPRVV GQEHYDVATR VQQILQEYKS LQDIIAILGM
301 DELSEADKLT VERARKIQRV LSQPFTVAQV FTGIEGKLVV LKETINSFKA
351 ILNGEGDNLV EGAFYVMVGF ASAKAKGEKI LAELEGQ

```

### Matched peptides information:

| Query              | Start - End | Observed  | Mr(expt)  | Mr(alc)   | ppm  | M | Score | Expect  | Rank | Q | Peptide               |
|--------------------|-------------|-----------|-----------|-----------|------|---|-------|---------|------|---|-----------------------|
| <a href="#">#1</a> | 245 - 261   | 1773.9659 | 1772.9596 | 1772.9196 | 22.0 | 0 | 50    | 0.029   | 1    | 0 | R-GISELQIYPAVDPLDSK.S |
| <a href="#">#1</a> | 269 - 280   | 1373.7419 | 1372.7346 | 1372.6735 | 44.5 | 0 | 67    | 0.00077 | 1    | 0 | R-VQEHYDVATR.V        |

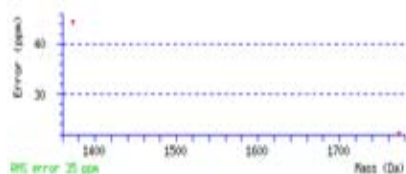

## Annotated ion spectra of the matched peptides with $p \leq 0.05$ :

CID No.: **49-1373.7**

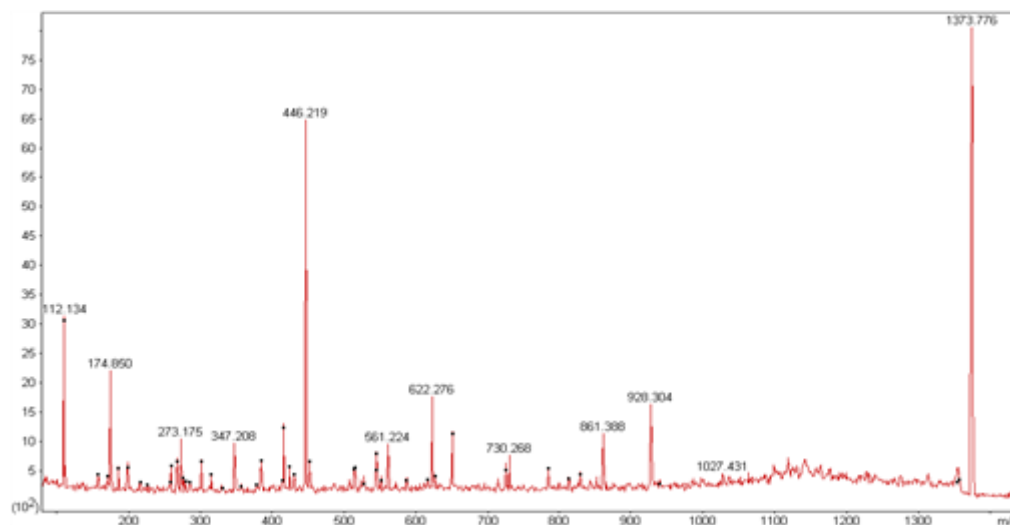

MS/MS Fragmentation of **R.VVGQEHYDVATR.V**

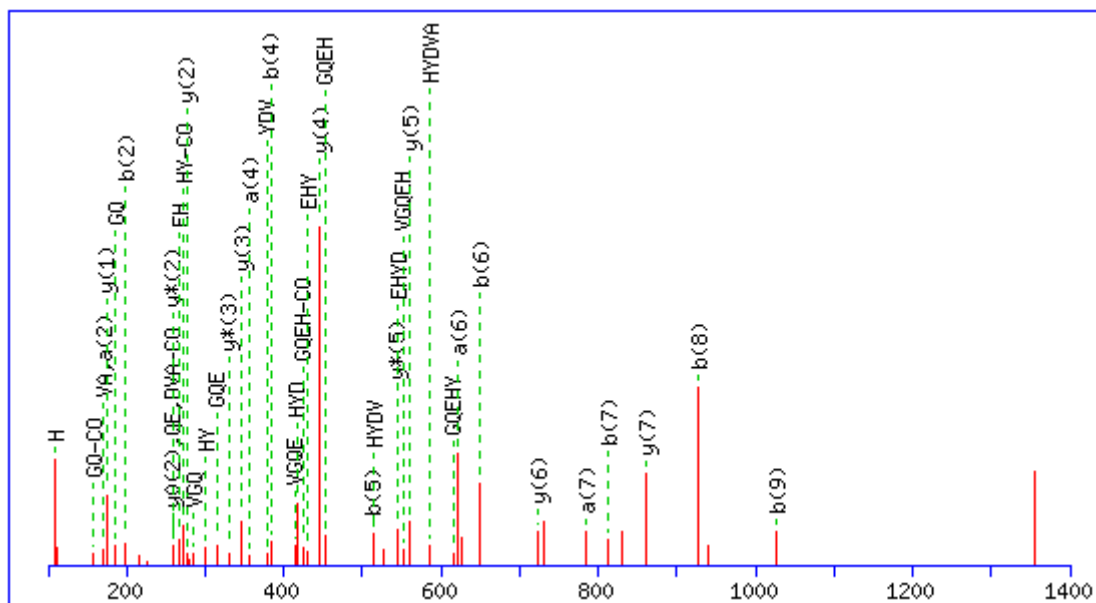

Monoisotopic mass of neutral peptide  $M_r(\text{calc})$ : 1372.6735



| #  | Immon.   | a         | a*        | a <sup>0</sup> | b         | b*        | b <sup>0</sup> | d         | d'        | Seq. | v         | w         | w'       | y         | y*        | y <sup>0</sup> | #  |
|----|----------|-----------|-----------|----------------|-----------|-----------|----------------|-----------|-----------|------|-----------|-----------|----------|-----------|-----------|----------------|----|
| 1  | 72.0808  | 72.0808   |           |                | 100.0757  |           |                | 44.0495   |           | V    |           |           |          |           |           |                | 12 |
| 2  | 72.0808  | 171.1492  |           |                | 199.1441  |           |                | 157.1335  |           | V    | 1230.5498 | 1243.5702 |          | 1274.6124 | 1257.5858 | 1256.6018      | 11 |
| 3  | 30.0338  | 228.1707  |           |                | 256.1656  |           |                |           |           | G    |           |           |          | 1175.5440 | 1158.5174 | 1157.5334      | 10 |
| 4  | 101.0709 | 356.2292  | 339.2027  |                | 384.2241  | 367.1976  |                | 299.2078  |           | Q    | 1045.4698 | 1044.4745 |          | 1118.5225 | 1101.4960 | 1100.5119      | 9  |
| 5  | 102.0550 | 485.2718  | 468.2453  | 467.2613       | 513.2667  | 496.2402  | 495.2562       | 427.2663  |           | E    | 916.4272  | 915.4319  |          | 990.4639  | 973.4374  | 972.4534       | 8  |
| 6  | 110.0713 | 622.3307  | 605.3042  | 604.3202       | 650.3257  | 633.2991  | 632.3151       |           |           | H    | 779.3682  |           |          | 861.4213  | 844.3948  | 843.4108       | 7  |
| 7  | 136.0757 | 785.3941  | 768.3675  | 767.3835       | 813.3890  | 796.3624  | 795.3784       |           |           | Y    | 616.3049  |           |          | 724.3624  | 707.3359  | 706.3519       | 6  |
| 8  | 88.0393  | 900.4210  | 883.3945  | 882.4104       | 928.4159  | 911.3894  | 910.4054       | 856.4312  |           | D    | 501.2780  | 500.2827  |          | 561.2991  | 544.2726  | 543.2885       | 5  |
| 9  | 72.0808  | 999.4894  | 982.4629  | 981.4789       | 1027.4843 | 1010.4578 | 1009.4738      | 985.4738  |           | V    | 402.2096  | 415.2300  |          | 446.2722  | 429.2456  | 428.2616       | 4  |
| 10 | 44.0495  | 1070.5265 | 1053.5000 | 1052.5160      | 1098.5215 | 1081.4949 | 1080.5109      |           |           | A    | 331.1724  |           |          | 347.2037  | 330.1772  | 329.1932       | 3  |
| 11 | 74.0600  | 1171.5742 | 1154.5477 | 1153.5637      | 1199.5691 | 1182.5426 | 1181.5586      | 1155.5793 | 1157.5586 | T    | 230.1248  | 243.1452  | 245.1244 | 276.1666  | 259.1401  | 258.1561       | 2  |
| 12 | 129.1135 |           |           |                |           |           |                |           |           | R    | 74.0237   | 73.0284   |          | 175.1190  | 158.0924  |                | 1  |

| Seq   | ya       | yb       | Seq    | ya       | yb       | Seq    | ya       | yb       |
|-------|----------|----------|--------|----------|----------|--------|----------|----------|
| VG    | 129.1022 | 157.0972 | VGQ    | 257.1608 | 285.1557 | VGQE   | 386.2034 | 414.1983 |
| VGQEH | 523.2623 | 551.2572 | VGQEHY | 686.3257 | 714.3206 | GQ     | 158.0924 | 186.0873 |
| GQE   | 287.1350 | 315.1299 | GQEH   | 424.1939 | 452.1888 | GQEHY  | 587.2572 | 615.2522 |
| QE    | 230.1135 | 258.1084 | QEH    | 367.1724 | 395.1674 | QEHY   | 530.2358 | 558.2307 |
| QEHYD | 645.2627 | 673.2576 | EH     | 239.1139 | 267.1088 | EHY    | 402.1772 | 430.1721 |
| EHYD  | 517.2041 | 545.1991 | EHYDV  | 616.2726 | 644.2675 | EHYDVA | 687.3097 | 715.3046 |
| HY    | 273.1346 | 301.1295 | HYD    | 388.1615 | 416.1565 | HYDV   | 487.2300 | 515.2249 |
| HYDVA | 558.2671 | 586.2620 | HYDVAT | 659.3148 | 687.3097 | YD     | 251.1026 | 279.0975 |
| YDV   | 350.1710 | 378.1660 | YDVA   | 421.2082 | 449.2031 | YDVAT  | 522.2558 | 550.2508 |
| DV    | 187.1077 | 215.1026 | DVA    | 258.1448 | 286.1397 | DVAT   | 359.1925 | 387.1874 |
| VA    | 143.1179 | 171.1128 | VAT    | 244.1656 | 272.1605 | AT     | 145.0972 | 173.0921 |

## Annotated ion spectra of the matched peptides with $p \leq 0.05$ :

CID No.: **49-1773.9**

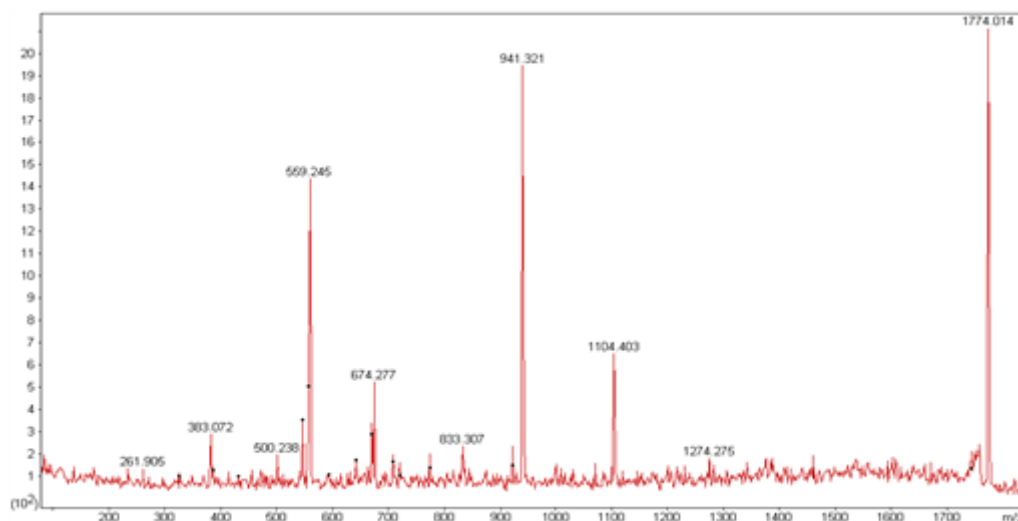

MS/MS Fragmentation of **R.GISELGIYPAVDPLDSK.S**

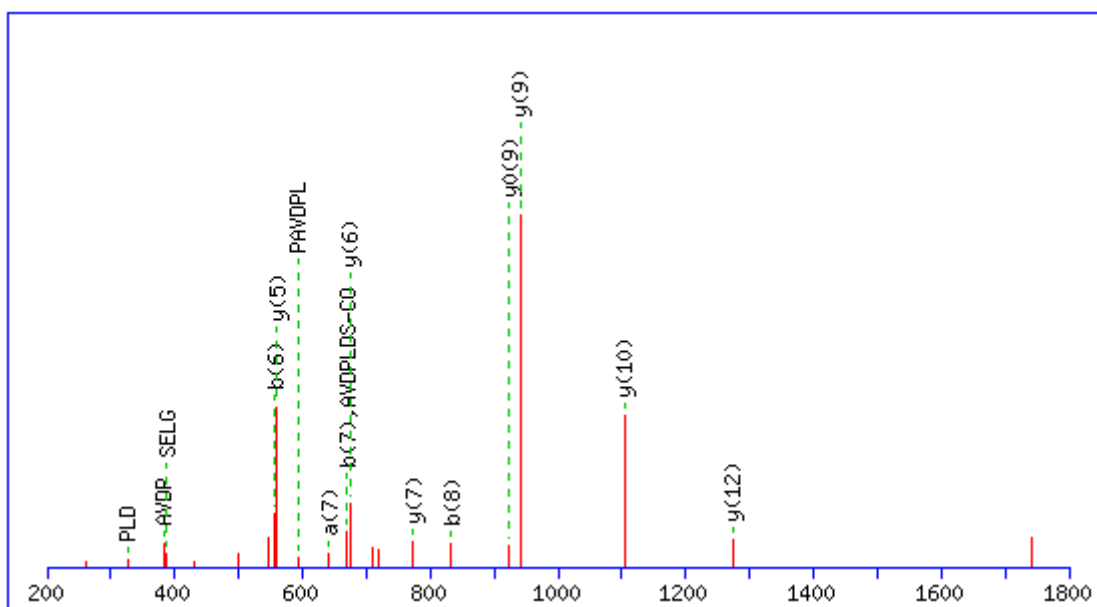

Monoisotopic mass of neutral peptide  $M_r(\text{calc})$ : 1772.9196

| #  | Immon.   | a               | a <sup>0</sup> | b               | b <sup>0</sup> | d         | d'       | Seq. | v         | w         | w'        | y                | y*        | y <sup>0</sup>  | #  |
|----|----------|-----------------|----------------|-----------------|----------------|-----------|----------|------|-----------|-----------|-----------|------------------|-----------|-----------------|----|
| 1  | 30.0338  | 30.0338         |                | 58.0287         |                | 44.0495   |          | G    |           |           |           |                  |           |                 | 17 |
| 2  | 86.0964  | 143.1179        |                | 171.1128        |                | 115.0866  | 129.1022 | I    | 1658.8272 | 1671.8476 | 1685.8632 | 1716.9054        | 1699.8789 | 1698.8949       | 16 |
| 3  | 60.0444  | 230.1499        | 212.1394       | 258.1448        | 240.1343       | 214.1550  |          | S    | 1571.7952 | 1570.7999 |           | 1603.8214        | 1586.7948 | 1585.8108       | 15 |
| 4  | 102.0550 | 359.1925        | 341.1819       | <b>387.1874</b> | 369.1769       | 301.1870  |          | E    | 1442.7526 | 1441.7573 |           | 1516.7894        | 1499.7628 | 1498.7788       | 14 |
| 5  | 86.0964  | 472.2766        | 454.2660       | 500.2715        | 482.2609       | 430.2296  |          | L    | 1329.6685 | 1328.6733 |           | 1387.7468        | 1370.7202 | 1369.7362       | 13 |
| 6  | 30.0338  | 529.2980        | 511.2875       | <b>557.2930</b> | 539.2824       |           |          | G    |           |           |           | <b>1274.6627</b> | 1257.6361 | 1256.6521       | 12 |
| 7  | 86.0964  | <b>642.3821</b> | 624.3715       | <b>670.3770</b> | 652.3665       | 614.3508  | 628.3665 | I    | 1159.5630 | 1172.5834 | 1186.5990 | 1217.6412        | 1200.6147 | 1199.6307       | 11 |
| 8  | 136.0757 | 805.4454        | 787.4349       | <b>833.4403</b> | 815.4298       |           |          | Y    | 996.4997  |           |           | <b>1104.5572</b> | 1087.5306 | 1086.5466       | 10 |
| 9  | 70.0651  | 902.4982        | 884.4876       | 930.4931        | 912.4825       | 876.4825  |          | P    | 899.4469  | 898.4516  |           | <b>941.4938</b>  | 924.4673  | <b>923.4833</b> | 9  |
| 10 | 44.0495  | 973.5353        | 955.5247       | 1001.5302       | 983.5197       |           |          | A    | 828.4098  |           |           | 844.4411         | 827.4145  | 826.4305        | 8  |
| 11 | 72.0808  | 1072.6037       | 1054.5932      | 1100.5986       | 1082.5881      | 1058.5881 |          | V    | 729.3414  | 742.3618  |           | <b>773.4040</b>  | 756.3774  | 755.3934        | 7  |
| 12 | 88.0393  | 1187.6307       | 1169.6201      | 1215.6256       | 1197.6150      | 1143.6408 |          | D    | 614.3144  | 613.3192  |           | <b>674.3355</b>  | 657.3090  | 656.3250        | 6  |
| 13 | 70.0651  | 1284.6834       | 1266.6729      | 1312.6783       | 1294.6678      | 1258.6678 |          | P    | 517.2617  | 516.2664  |           | <b>559.3086</b>  | 542.2821  | 541.2980        | 5  |
| 14 | 86.0964  | 1397.7675       | 1379.7569      | 1425.7624       | 1407.7518      | 1355.7205 |          | L    | 404.1776  | 403.1823  |           | 462.2558         | 445.2293  | 444.2453        | 4  |
| 15 | 88.0393  | 1512.7944       | 1494.7839      | 1540.7894       | 1522.7788      | 1468.8046 |          | D    | 289.1506  | 288.1554  |           | 349.1718         | 332.1452  | 331.1612        | 3  |
| 16 | 60.0444  | 1599.8265       | 1581.8159      | 1627.8214       | 1609.8108      | 1583.8316 |          | S    | 202.1186  | 201.1234  |           | 234.1448         | 217.1183  | 216.1343        | 2  |
| 17 | 101.1073 |                 |                |                 |                |           |          | K    | 74.0237   | 73.0284   |           | 147.1128         | 130.0863  |                 | 1  |

| Seq    | ya       | yb              | Seq    | ya       | yb              | Seq     | ya       | yb              |
|--------|----------|-----------------|--------|----------|-----------------|---------|----------|-----------------|
| IS     | 173.1285 | 201.1234        | ISE    | 302.1710 | 330.1660        | ISEL    | 415.2551 | 443.2500        |
| ISELG  | 472.2766 | 500.2715        | ISELGI | 585.3606 | 613.3556        | SE      | 189.0870 | 217.0819        |
| SEL    | 302.1710 | 330.1660        | SELG   | 359.1925 | <b>387.1874</b> | SELGI   | 472.2766 | 500.2715        |
| SELGIY | 635.3399 | 663.3348        | EL     | 215.1390 | 243.1339        | ELG     | 272.1605 | 300.1554        |
| ELGI   | 385.2445 | 413.2395        | ELGIY  | 548.3079 | 576.3028        | ELGIYP  | 645.3606 | 673.3556        |
| LG     | 143.1179 | 171.1128        | LGI    | 256.2020 | 284.1969        | LGIY    | 419.2653 | 447.2602        |
| LGIYP  | 516.3180 | 544.3130        | LGIYPA | 587.3552 | 615.3501        | LGIYPAV | 686.4236 | 714.4185        |
| GI     | 143.1179 | 171.1128        | GIY    | 306.1812 | 334.1761        | GIYP    | 403.2340 | 431.2289        |
| GIYPA  | 474.2711 | 502.2660        | GIYPAV | 573.3395 | 601.3344        | GIYPAVD | 688.3665 | 716.3614        |
| IY     | 249.1598 | 277.1547        | IYP    | 346.2125 | 374.2074        | IYPA    | 417.2496 | 445.2445        |
| IYPAV  | 516.3180 | 544.3130        | IYPAVD | 631.3450 | 659.3399        | YP      | 233.1285 | 261.1234        |
| YPA    | 304.1656 | 332.1605        | YPAV   | 403.2340 | 431.2289        | YPAVD   | 518.2609 | 546.2558        |
| YPAVDP | 615.3137 | 643.3086        | PA     | 141.1022 | 169.0972        | PAV     | 240.1707 | 268.1656        |
| PAVD   | 355.1976 | <b>383.1925</b> | PAVDP  | 452.2504 | 480.2453        | PAVDPL  | 565.3344 | <b>593.3293</b> |

|         |                 |                 |       |          |                 |        |          |                 |
|---------|-----------------|-----------------|-------|----------|-----------------|--------|----------|-----------------|
| PAVDPLD | 680.3614        | 708.3563        | AV    | 143.1179 | 171.1128        | AVD    | 258.1448 | 286.1397        |
| AVDP    | 355.1976        | <b>383.1925</b> | AVDPL | 468.2817 | 496.2766        | AVDPLD | 583.3086 | 611.3035        |
| AVDPLDS | <b>670.3406</b> | 698.3355        | VD    | 187.1077 | 215.1026        | VDP    | 284.1605 | 312.1554        |
| VDPL    | 397.2445        | 425.2395        | VDPLD | 512.2715 | 540.2664        | VDPLDS | 599.3035 | 627.2984        |
| DP      | 185.0921        | 213.0870        | DPL   | 298.1761 | <b>326.1710</b> | DPLD   | 413.2031 | 441.1980        |
| DPLDS   | 500.2351        | 528.2300        | PL    | 183.1492 | 211.1441        | PLD    | 298.1761 | <b>326.1710</b> |
| PLDS    | 385.2082        | 413.2031        | LD    | 201.1234 | 229.1183        | LDS    | 288.1554 | 316.1503        |
| DS      | 175.0713        | 203.0662        |       |          |                 |        |          |                 |

Spot No.: **50**

Mascot score: **80**

Species: *Fusarium oxysporum f. sp. cubense race 4*

Protein name: **Enolase**

NCBI accession No.: **gi| 475668982**      Sequence coverage %: **38**

Matched peptides No.: **17**      Total peptides No.: **63**

Calculated Mr: **47469**      Calculated pI: **5.06**

### Annotated PMF spectra:

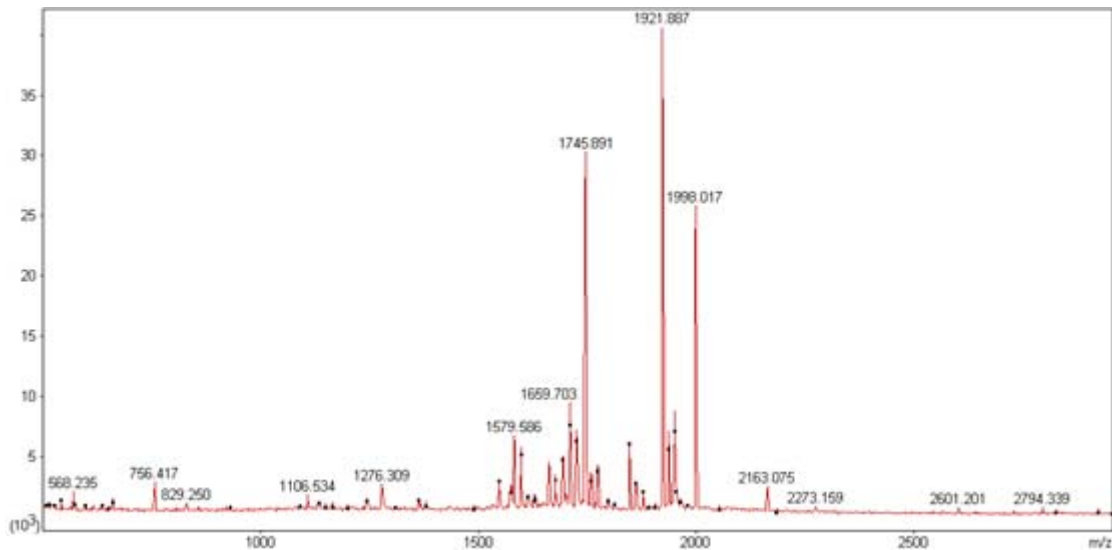

### Probability Based Mowse Score:

Protein score is  $-10 \cdot \log(P)$ , where P is the probability that the observed match is a random event. Protein scores greater than 75 are significant ( $p < 0.05$ ).

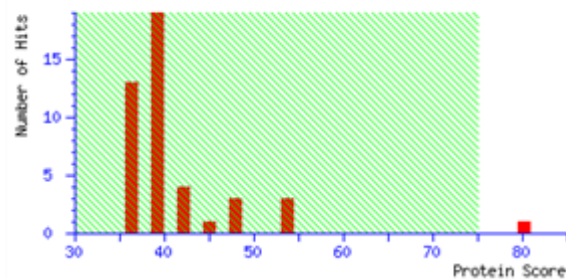

Matched peptide sequences: shown in **Bold Red**

1 MAVKKVFARS VYDSRGNPTV EVDVVTETGL HRAIVPSGAS TGQHEACELR  
 51 DGDKSKWGGK GVTKAVENVN TVIAPALIEK NLDVVDQSAV **DAFLNELDGT**  
 101 **PNKTKL**GANA ILGVSLAVAK AGAAEKGVPL YAHVSDLAGT KKPYPVLPVPF  
 151 MNVLNGGSHA GGRLAFQEFM IVPTEAPTFT **EAMRQGA**EVY **QALKGLAKKR**  
 201 YGQSAGNVGD EGGVAPDIQT AEEALELITD AIEQVGYTGK **IKIAMDVASS**  
 251 **EFYKVEEKY** **DLD**FKNPESD PTKWITYEEL **ANLYSELCKK** **YPIVSIEDPF**  
 301 **AEDDWEAWSY** **FSKTQDIQIV** **GDDLTVTNPL** **RIKKAI**ELKS **CNALLLKVNQ**  
 351 **IGTLTESIQA** **AKDSYADGWG** **VMVSHRSGET** **EDVTIADIAV** **GLRAGEIKTG**  
 401 **APAR**SERLAK **LNQILRI**EEE **LGDQAIY**PGA **NFRKSVNL**

Matched peptides information:

| Start - End | Observed  | Mr (expt) | Mr (calc) | ppm   | M | Peptide                              |
|-------------|-----------|-----------|-----------|-------|---|--------------------------------------|
| 86 - 105    | 2163.0749 | 2162.0676 | 2162.0491 | 8.55  | 1 | K.DQSAVDAPFLNELDOTPHRYK.L            |
| 185 - 194   | 1106.5336 | 1105.5263 | 1105.5768 | -45.6 | 0 | R.QGAEVYQALK.G                       |
| 243 - 254   | 1360.5955 | 1359.5882 | 1359.6380 | -36.6 | 0 | K.IAMDVASSEFYK.V                     |
| 243 - 254   | 1376.6424 | 1375.6351 | 1375.6329 | 1.58  | 0 | K.IAMDVASSEFYK.V + Oxidation (O)     |
| 243 - 258   | 1845.9591 | 1844.9518 | 1844.8866 | 35.4  | 1 | K.IAMDVASSEFYRVEEK.K                 |
| 243 - 258   | 1861.9336 | 1860.9263 | 1860.8815 | 24.1  | 1 | K.IAMDVASSEFYRVEEK.K + Oxidation (O) |
| 259 - 265   | 928.3601  | 927.3529  | 927.4702  | -126  | 1 | K.IYDLDPK.N                          |
| 290 - 313   | 2922.4245 | 2921.4172 | 2921.3436 | 25.2  | 1 | K.KYPIVSIEDPFAEDDWEAWSYFSK.T         |
| 291 - 313   | 2794.3394 | 2793.3321 | 2793.2486 | 29.9  | 0 | K.YPIVSIEDPFAEDDWEAWSYFSK.T          |
| 314 - 331   | 1998.0174 | 1997.0101 | 1997.0430 | -16.4 | 0 | K.TQDIQIVGDDLTVTNPLR.I               |
| 348 - 362   | 1572.8010 | 1571.7937 | 1571.8519 | -37.0 | 0 | K.VNQIGTLTESIQAAK.D                  |
| 363 - 376   | 1579.5855 | 1578.5782 | 1578.6885 | -69.9 | 0 | K.DSYADGWVMVSHR.S                    |
| 363 - 376   | 1595.5888 | 1594.5515 | 1594.6835 | -82.7 | 0 | K.DSYADGWVMVSHR.S + Oxidation (O)    |
| 377 - 393   | 1745.8907 | 1744.8834 | 1744.8843 | -0.51 | 0 | R.SGETEDVTIADIAVGLR.A                |
| 399 - 404   | 572.2901  | 571.2828  | 571.3078  | -43.8 | 0 | K.TGAPAR.S                           |
| 411 - 416   | 756.4167  | 755.4094  | 755.4653  | -74.0 | 0 | K.LNQILR.I                           |
| 417 - 433   | 1921.8874 | 1920.8801 | 1920.9217 | -21.7 | 0 | R.IEEELGDQAIYPGANFR.K                |

Spot No.: **51**

Mascot score: **216**

Species: *Fusarium oxysporum f. sp. cubense race 1*

Protein name: **Chitooligosaccharidolytic**

**beta-N-acetylglucosaminidase**

NCBI accession No.: **gi| 477507289**

Sequence coverage %: **48**

Matched peptides No.: **24**

Total peptides No.: **51**

Calculated Mr: **66058**

Calculated pI: **5.31**

### Annotated PMF spectra:

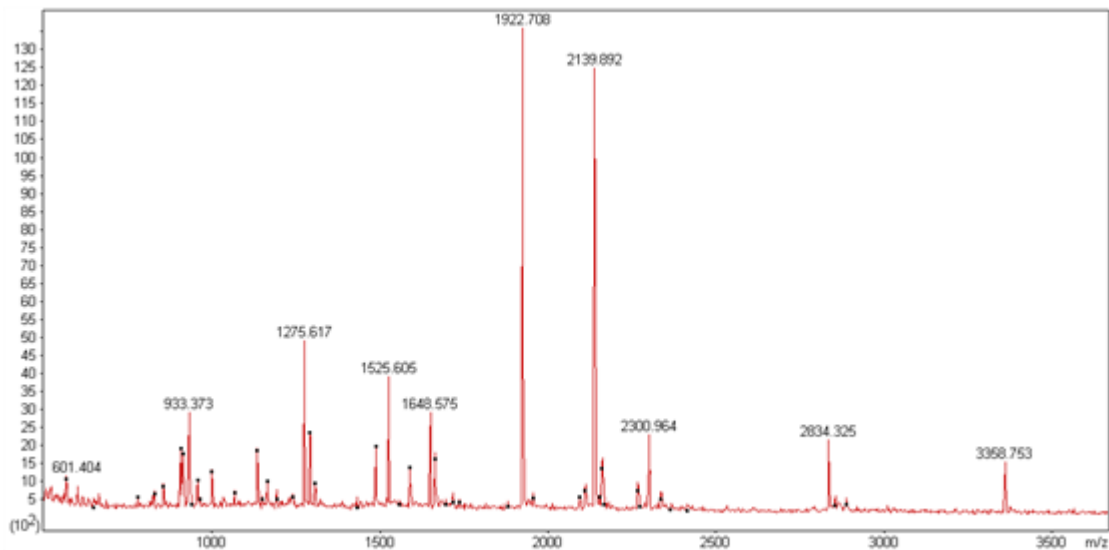

### Probability Based Mowse Score:

Protein score is  $-10 \cdot \log(P)$ , where P is the probability that the observed match is a random event. Protein scores greater than 75 are significant ( $p < 0.05$ ).

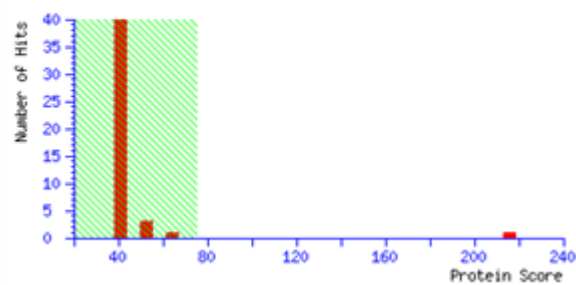

## Matched peptide sequences: shown in **Bold Red**

```

1 MWSKAKALLA IAAFALTPVD AIWPVPPKIS TGDKVLFIDQ SLDITYNGDF
51 MPYTYKQPD AGSKFNSKQI VQAGVSRALQ AIFNDNFVPW KLRERNSDFE
101 PDLQKQWVK SLKIVQTEED DKSTFKPLAG EVDESYSLTL SEKGEASIKA
151 KSSSTGILHGL ETFLQLFFKH SSGTSWYTPH APVTIQDAPE YPHRGILLDV
201 ARSFFEVEHI KRTIDAMSW S KLNRLHLHIT DSQSWPLEIP ALPKLAEKGA
251 YRKGLTYSPE DLAGIYEYGV HRGVEVIMEI DMPGHIGVVE LAYKDLIVAY
301 NEKPYQWCK EPPCGAFRMN STDVYDFLDT LFEDLFPRIS PYSAYFHAGG
351 DELNHNSM L DPGVRSNKTE VLAPLLQKFV DYTHGKIRDA GLTPFVWEEM
401 ITEWNMTL GK DVVIQSWLGN GAVKAMAEAG HKVIDSDYNF WYLD CGRGQW
451 LNFNNGEAFK TYYPFNDCG PTKSWRLIYS HDPRAGLSEE AAKLVLGGEA
501 AVWTETIDSV NLDTIVWPR AVMGEVLWSG RTDASGQNR QYDAAPRLAE
551 LRERMVARGV SASPIQMPFC TQGNATECAQ FDG

```

## Matched peptides information:

| Start | End | Observed  | Mr (expt) | Mr (calc) | ppm   | M | Peptide                                    |
|-------|-----|-----------|-----------|-----------|-------|---|--------------------------------------------|
| 69    | 77  | 957.4909  | 956.4837  | 956.5403  | -59.2 | 0 | K.QIVQAGVSR.A                              |
| 78    | 91  | 1662.6921 | 1661.6848 | 1661.8566 | -103  | 0 | R.ALQAI FNDNFVPMK.L                        |
| 96    | 105 | 1192.4834 | 1191.4761 | 1191.5408 | -54.3 | 0 | R.RSDFE PDLQK.K                            |
| 114   | 143 | 3358.7529 | 3357.7456 | 3357.6351 | 32.9  | 1 | K.IVQTEEDDKSTFKPLAGEVDESYSLTLSEK.G         |
| 123   | 143 | 2300.9642 | 2299.9569 | 2300.1423 | -80.6 | 0 | K.STFKPLAGEVDESYSLTLSEK.G                  |
| 123   | 149 | 2886.5368 | 2885.5295 | 2885.4546 | 26.0  | 1 | K.STFKPLAGEVDESYSLTLSEKGEASIK.A            |
| 170   | 194 | 2834.3254 | 2833.3181 | 2833.3208 | -0.96 | 0 | K.RSSGTSWYTPHAPVTIQDAPEYPRH.G              |
| 195   | 202 | 856.4777  | 855.4704  | 855.5178  | -55.3 | 0 | R.GILLDVAR.S                               |
| 203   | 211 | 1135.5106 | 1134.5033 | 1134.5710 | -59.6 | 0 | R.SFFEVEHIK.R                              |
| 253   | 272 | 2267.9497 | 2266.9424 | 2267.1222 | -79.3 | 1 | R.KGLTYSPE DLAGIYEYGVHR.G                  |
| 254   | 272 | 2139.8918 | 2138.8845 | 2139.0273 | -66.7 | 0 | K. GLTYSPE DLAGIYEYGVHR.G                  |
| 273   | 294 | 2415.1153 | 2414.1080 | 2414.2225 | -47.4 | 0 | R.GVEVIHEIDMPOHIGVVELAYK.D + Oxidation (0) |
| 295   | 310 | 2112.8413 | 2111.8340 | 2112.0139 | -85.1 | 0 | K.DLIVAYNEKPYQWCK.E                        |
| 311   | 318 | 933.3735  | 932.3662  | 932.4174  | -54.9 | 0 | K.EPPCGAFR.M                               |
| 379   | 386 | 966.3873  | 965.3801  | 965.4607  | -83.5 | 0 | K.PVDYTHGK.I                               |
| 433   | 447 | 1922.7082 | 1921.7009 | 1921.8305 | -67.4 | 0 | K.VIDSDYNFMYLDCOR.G                        |
| 448   | 460 | 1525.6055 | 1524.5982 | 1524.6997 | -66.6 | 0 | R.QQLNPNFNGEAFK.T                          |
| 461   | 473 | 1648.5751 | 1647.5678 | 1647.7028 | -81.9 | 0 | K.TYYPFNDCGPTK.S                           |
| 477   | 484 | 1000.4477 | 999.4404  | 999.5138  | -73.4 | 0 | R.LIYSDPR.A                                |
| 494   | 519 | 2854.5070 | 2853.4997 | 2853.4913 | 2.96  | 0 | K.LVLGGEAAVWTETIDSVNLDTIVWPR.A             |
| 520   | 531 | 1275.6169 | 1274.6096 | 1274.6441 | -27.1 | 0 | R.AAVMGEVLSGR.T                            |
| 520   | 531 | 1291.5974 | 1290.5901 | 1290.6391 | -37.9 | 0 | R.AAVMGEVLSGR.T + Oxidation (0)            |
| 540   | 547 | 907.3954  | 906.3881  | 906.4195  | -34.7 | 0 | R.SQYDAAPR.L                               |
| 548   | 552 | 601.4044  | 600.3971  | 600.3595  | 62.7  | 0 | R.LAELR.E                                  |

Spot No.: **52**

Mascot score: **81**

Species: *Fusarium oxysporum Fo5176*

Protein name: **2-nitropropane dioxygenase**

NCBI accession No.: **gi| 342879444**      Sequence coverage %: **54**

Matched peptides No.: **18**      Total peptides No.: **61**

Calculated Mr: **36989**      Calculated pI: **5.78**

### Annotated PMF spectra:

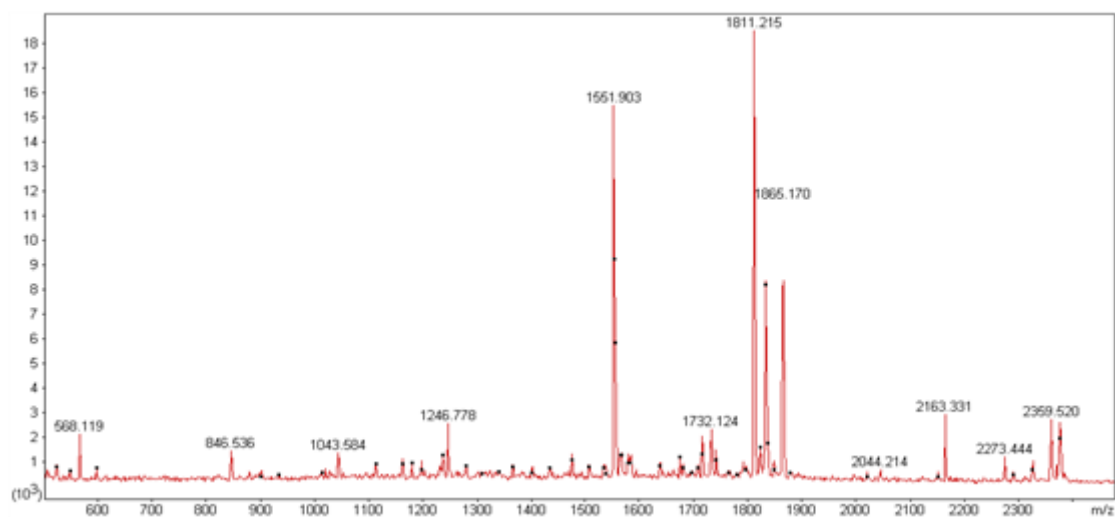

### Probability Based Mowse Score:

Protein score is  $-10 \cdot \log(P)$ , where P is the probability that the observed match is a random event. Protein scores greater than 75 are significant ( $p < 0.05$ ).

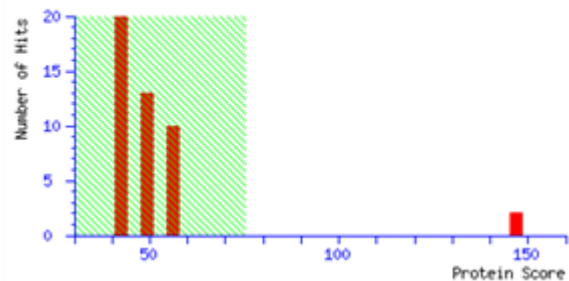



## Matched peptide sequences: shown in **Bold Red**

**1 MASPQKL RTP ITDLFKIQHP VLLAGMNVAA GPKLAAAVSN AGGLGVIGGV**  
**51 GYTPDMLREQ IAELKSFLND KNAFPQVDLL LPQVGGSSARK TNYDYTKGKL**  
**101 NELVDIIIEE GARLFVSAVG VPPKAVVDKL HANGIVYMMN IGHVKHVQKC**  
**151 LDLGVDIICA QGGEGGGHTG DIPTTVLIPA VVDICKKHKS PLTGGFPVQVI**  
**201 AAGGIHNGQL LAAALMMGAG AVWEAVRTSG HDDNIRTIIW TGRPMRVRNN**  
**251 DYINDWEVNR QAEIKELVSK GVIPEADLD KLAEASDND SDDDEDLLDK**  
**301 YRPLYMGKCA AVVNEQKPAK AVVDEFVDDA VAWLQKGNKM IAKL**

## Matched peptides information:

| Start - End | Observed  | Mr (expt) | Mr (calc) | ppm  | M | Peptide                                      |
|-------------|-----------|-----------|-----------|------|---|----------------------------------------------|
| 9 - 16      | 934.5848  | 933.5775  | 933.5171  | 64.6 | 0 | R.TPITDLFK.I                                 |
| 17 - 33     | 1716.1213 | 1715.1140 | 1714.9552 | 92.6 | 0 | K.IQHPVLLAGMNVAAQPK.L                        |
| 17 - 33     | 1732.1245 | 1731.1172 | 1730.9501 | 96.5 | 0 | K.IQHPVLLAGMNVAAQPK.L + Oxidation (0)        |
| 34 - 58     | 2359.5204 | 2358.5131 | 2358.2366 | 117  | 0 | K.LAAAVSNAGGLGVIGGVYTPDMLR.E                 |
| 34 - 58     | 2375.5307 | 2374.5234 | 2374.2315 | 123  | 0 | K.LAAAVSNAGGLGVIGGVYTPDMLR.E + Oxidation (0) |
| 59 - 71     | 1534.8879 | 1533.8806 | 1533.8038 | 50.1 | 1 | R.EQIAELKSFLNDR.H                            |
| 72 - 89     | 1811.2150 | 1810.2077 | 1809.9737 | 129  | 0 | K.NAPFPQVDLLLPQVGGSSAR.K                     |
| 98 - 113    | 1741.1677 | 1740.1604 | 1739.9669 | 111  | 1 | K.GKLNELVDIIIEEGAK.L                         |
| 100 - 113   | 1556.0631 | 1555.0558 | 1554.8504 | 132  | 0 | K.LNELVDIIIEEGAK.L                           |
| 114 - 124   | 1113.7355 | 1112.7282 | 1112.6594 | 61.9 | 0 | K.LFVSAVQVPPK.A                              |
| 125 - 145   | 2325.5425 | 2324.5352 | 2324.2133 | 139  | 1 | K.AVVDKLHANGIVYMMNIGHVK.H + Oxidation (0)    |
| 130 - 145   | 1797.1317 | 1796.1244 | 1795.9225 | 112  | 0 | K.LHANGIVYMMNIGHVK.H                         |
| 130 - 149   | 2289.4226 | 2288.4153 | 2288.2034 | 92.6 | 1 | K.LHANGIVYMMNIGHVKHVQR.C                     |
| 228 - 236   | 1014.5485 | 1013.5412 | 1013.4526 | 87.4 | 0 | R.TSGHDDNIR.T                                |
| 237 - 246   | 1246.7781 | 1245.7708 | 1245.6652 | 84.8 | 0 | R.TIWTGRPMR.V + Oxidation (0)                |
| 249 - 260   | 1551.9027 | 1550.8954 | 1550.6750 | 142  | 0 | R.NNDYINDWEVNR.Q                             |
| 301 - 308   | 1043.5837 | 1042.5764 | 1042.5270 | 47.4 | 0 | K.YRPLYMGK.C + Oxidation (0)                 |
| 321 - 336   | 1833.1703 | 1832.1630 | 1831.9105 | 138  | 0 | K.AVVDEFVDDAVAWLQK.R                         |

Spot No.: **53**

Mascot score: **76**

Species: *Fusarium oxysporum f. sp. cubense race 4*

Protein name: **1,3-beta-glucanosyltransferase gel4**

NCBI accession No.: **gi| 475668458**      Sequence coverage %: **29**

Matched peptides No.: **15**      Total peptides No.: **62**

Calculated Mr: **59159**      Calculated pI: **4.83**

### Annotated PMF spectra:

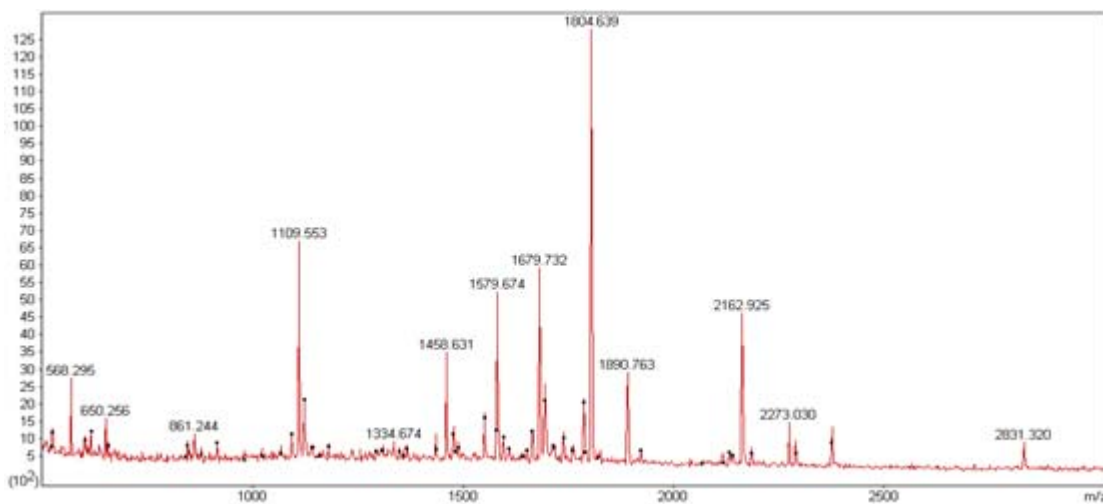

### Probability Based Mowse Score:

Protein score is  $-10 \cdot \log(P)$ , where P is the probability that the observed match is a random event. Protein scores greater than 75 are significant ( $p < 0.05$ ).

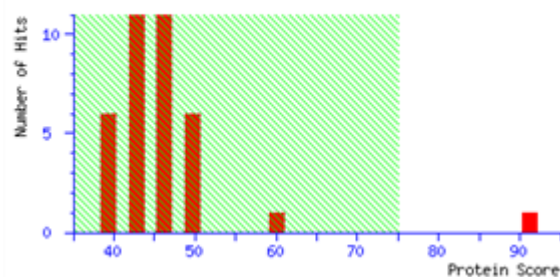

## Matched peptide sequences: shown in **Bold Red**

```

1  MKFSAAIVAA AATAASAKLE PITMKGSKLF YSNGTQFFMK GVAYQQDTAA
51 AGETNDKTTK YIDPLADED A CKRDIPLLKQ LGTNIIRTYA INPKADHKAC
101 MKLLDDAGIY VISDLSEPSV SINRDDPKWD VELYERYIGV VDELGQYDNV
151 VGFFAGNEVS NNVSNTQASA FVKA AVRDTK KHIKSKFSRW LGVGYASNDD
201 VDIREQIADY FNCGDDDSRI DYWGYNIYSW CGKSSMQDSG YADQAKFFEN
251 YSVPVFFAEY GCNEPDGAAG RIFDETTALY EKVMTDVFS GGIVYMYFQE
301 ANDYGLVKIS KINGDAVKQKD FAQLQKKANA AKPSGVEEDS YKPTGKAATC
351 PEQSKNWRAN SVLPPVPDS LCDCMVKSRS CVPADNLKAK DFNDIFGYIC
401 GQDKICTAI NANATAGIYG AYSMCSNEAK LAYILDAYYT SQKSAADACD
451 FKGKATTQKA ESQDSCKSAL ASASKINEEV ATATHAVASS STGGSNSNSE
501 DDENFGLQAA SIARVFLGD FAVGAYMAVA GVVGAGMVLL

```

## Matched peptides information:

| Start - End | Observed  | Mr(expt)  | Mr(calc)  | ppm   | M | Peptide                                  |
|-------------|-----------|-----------|-----------|-------|---|------------------------------------------|
| 41 - 57     | 1738.6554 | 1737.6481 | 1737.7806 | -76.2 | 0 | K.GVAYQQDTAAAGETNDK.T                    |
| 41 - 60     | 2068.8149 | 2067.8076 | 2067.9709 | -78.9 | 1 | K.GVAYQQDTAAAGETNDKTTK.Y                 |
| 74 - 87     | 1593.6572 | 1592.6499 | 1592.9613 | -196  | 1 | R.DIPLKQLOTNIIR.T                        |
| 80 - 87     | 914.5843  | 913.5770  | 913.5345  | 46.5  | 0 | K.QLOTNIIR.T                             |
| 103 - 128   | 2831.3203 | 2830.3130 | 2830.4236 | -39.1 | 1 | K.LLDDAGIYVISDLSEPSVSINRDDPK.W           |
| 129 - 136   | 1109.5526 | 1108.5453 | 1108.5189 | 23.8  | 0 | K.MDVELYER.Y                             |
| 190 - 204   | 1679.7317 | 1678.7244 | 1678.7951 | -42.1 | 0 | R.WLGVGYASNDVDIR.E                       |
| 205 - 219   | 1804.6387 | 1803.6314 | 1803.7006 | -38.4 | 0 | R.EQIADYFNCGDDDSR.I                      |
| 272 - 283   | 1458.6307 | 1457.6234 | 1457.6926 | -47.4 | 0 | R.IFDETTALYEEK.V                         |
| 359 - 377   | 2116.8474 | 2115.8401 | 2115.9639 | -58.5 | 0 | R.ANSVLPPVPDSLDCDCMVK.S                  |
| 359 - 377   | 2132.8154 | 2131.8081 | 2131.9588 | -70.7 | 0 | R.ANSVLPPVPDSLDCDCMVK.S + Oxidation (0)  |
| 359 - 379   | 2376.0964 | 2375.0891 | 2375.0920 | -1.20 | 1 | R.ANSVLPPVPDSLDCDCMVKS.S + Oxidation (0) |
| 389 - 404   | 1890.7630 | 1889.7557 | 1889.8618 | -56.1 | 1 | K.AJDFNDIFGYICOQDK.K                     |
| 391 - 404   | 1691.7118 | 1690.7045 | 1690.7297 | -14.9 | 0 | K.DFNDIFGYICOQDK.K                       |
| 431 - 443   | 1548.6985 | 1547.6912 | 1547.7871 | -62.0 | 0 | K.LAYILDAYYTSQK.S                        |

Spot No.: **54**

NCBI accession No.: **gi/607818**

Plant species: ***Neurospora crassa***

Protein name: **70 kDa heat shock protein**

Mascot score: **83**

Sequence coverage %: **5**

The number of matched peptides with  $p \leq 0.05$ : **3**

Calculated Mr: **70786**

Calculated Pi: **5.03**

### Annotated MS spectra:

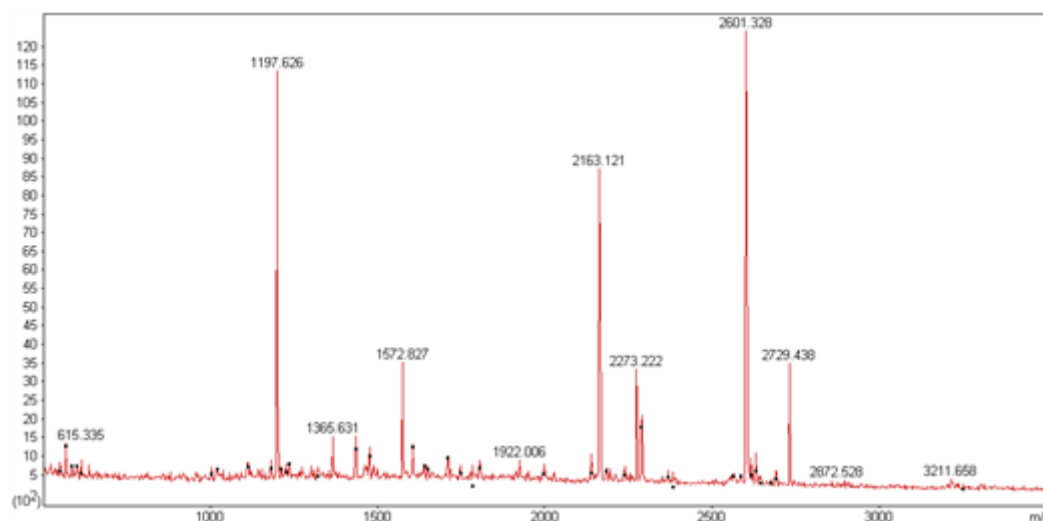

### Probability Based Mowse Score:

Ions score is  $-10 \cdot \log(P)$ , where P is the probability that the observed match is a random event. Individual ions scores  $> 47$  indicate identity or extensive homology ( $p < 0.05$ ). Protein scores are derived from ions scores as a non-probabilistic basis for ranking protein hits.

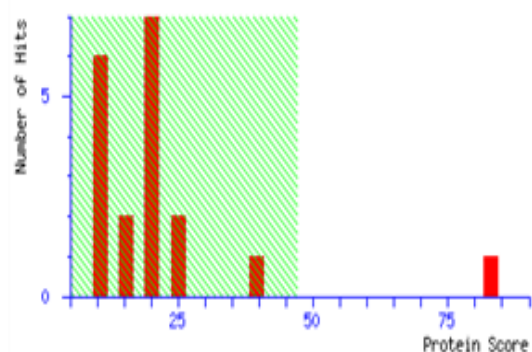

Matched peptide sequences: shown in **Bold Red**

```

1  MAPAVGIDLG  TTYSVGVFR  EDRCEIAND  QGNRTTPSFV  AFTDTERLVG
51  DAAKNQVAMN  PANTVFDAGR  LIGRKFSDFE  VQADMKHFPF  KVIDRGGKPV
101 IQVEFKGETK  VFTPEEISAM  ILQMKETAE  AYLGGTVNNA  VVTVPAYFND
151 SQRQATKDAG  LIAGLNLVRI  INEPTAAIA  YGLDKKVEGE  RNVLIFDLGG
201 GTFDVSLLTI  EEGIFEVKST  AGDTHLGGED  FDNRLVNHFV  QEFKRKDKKD
251 LSTNARALRR  LRTACERAKR  TLSSAQTSI  EIDSLFEGID  FYTSITRARF
301 EELCQDLFRS  TLQPVDRVLT  DAKIDKSQVH  EIVLVGGSTR  IPRIQKLISD
351 YFDGKEPNKR  INPDEAVAYG  AAVQAAILSG  DTSSKSTSEI  LLDVAPLSL
401 GIETAGGMMT  KLIPRNTTIP  TKKSEVFSTF SDNQPGVLIQ VYGERQRTK
451 DNNLLGKFEL TGIPPAPRGV  PQIEVTFDVD  ANGIMNVSAL  EKGIGKTNQI
501 TIINDKGRSL  KEEIERMLAE  AEKFKEEDEA  EAKRVAKNG  LESYAYSLRN
551 TLSDSKVDEK  LDAADKEKLE  SEIDKIVAWL  DENQQATREE  YEERQKELEA
601 IANPIMMKFY  GAGGAPGGMP  GAAPGGFPGG  APGSNDNEGP  TVEEVD

```

Matched peptides information:

| Query     | Start - End | Observed  | Mr(expt)  | Mr(calc)  | ppm   | M | Score | Expect | Rank | Q | Peptide                    |
|-----------|-------------|-----------|-----------|-----------|-------|---|-------|--------|------|---|----------------------------|
| <i>q2</i> | 424 - 446   | 2601.3279 | 2600.3204 | 2600.2395 | 31.2  | 0 | 38    | 0.33   | 1    | 0 | K.SVVFSTFSDNQPGVLIQVYGER.Q |
| <i>q2</i> | 424 - 446   | 2601.3279 | 2600.3204 | 2600.2395 | 31.2  | 0 | 38    | 0.33   | 1    | 0 | K.SVVFSTFSDNQPGVLIQVYGER.Q |
| <i>q1</i> | 438 - 468   | 1197.6260 | 1196.6187 | 1196.6553 | -30.6 | 0 | 45    | 0.12   | 1    | 0 | K.FELTGIPPAPR.G            |

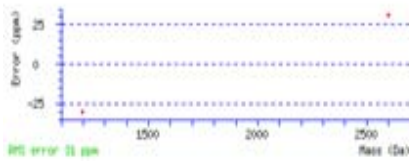

## Annotated ion spectra of the matched peptides with $p \leq 0.05$ :

CID No.: **54-1197.6**

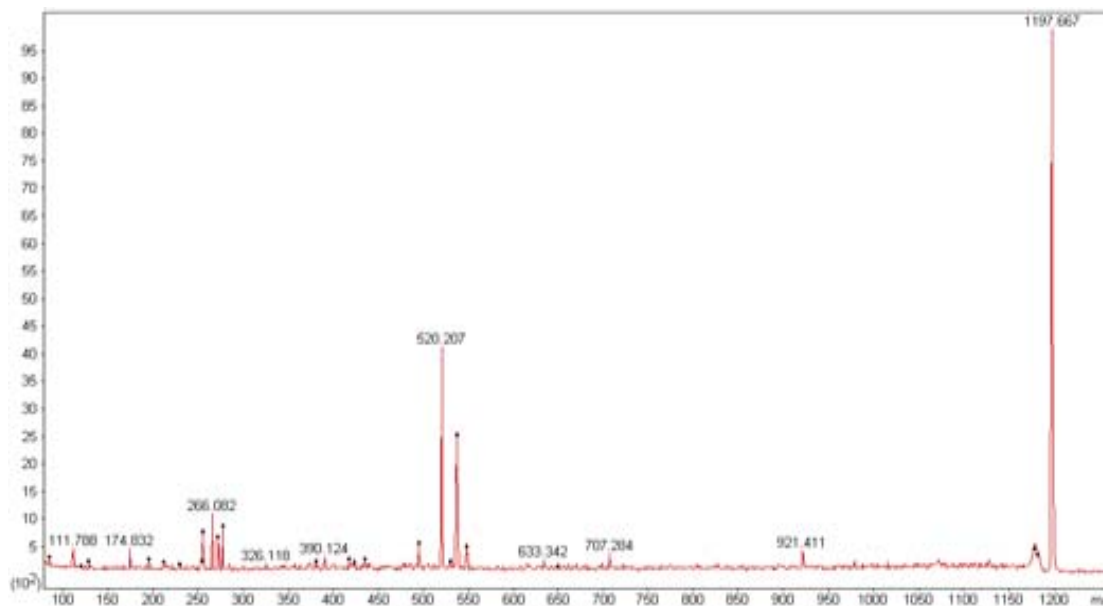

### MS/MS Fragmentation of **K.FELTGIPPAPR.G**

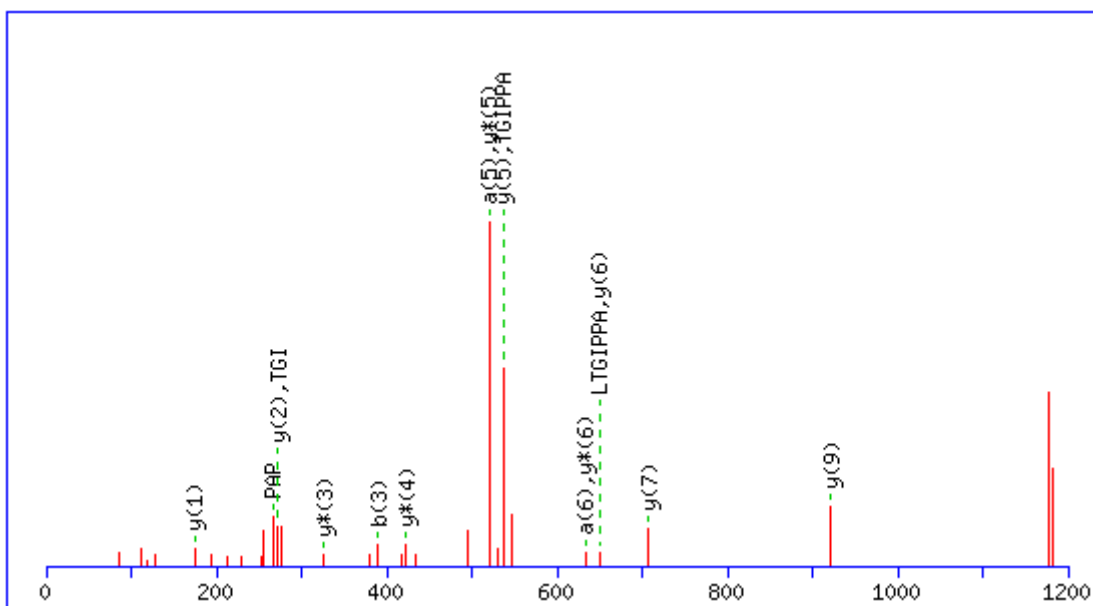

Monoisotopic mass of neutral peptide  $M_r(\text{calc})$ : 1196.6553

| #  | Immon.   | a               | a <sup>0</sup> | b               | b <sup>0</sup> | d        | d'       | Seq. | v        | w        | w'       | y               | y*              | y <sup>0</sup> | #  |
|----|----------|-----------------|----------------|-----------------|----------------|----------|----------|------|----------|----------|----------|-----------------|-----------------|----------------|----|
| 1  | 120.0808 | 120.0808        |                | 148.0757        |                | 44.0495  |          | F    |          |          |          |                 |                 |                | 11 |
| 2  | 102.0550 | 249.1234        | 231.1128       | 277.1183        | 259.1077       | 191.1179 |          | E    | 976.5574 | 975.5622 |          | 1050.5942       | 1033.5677       | 1032.5837      | 10 |
| 3  | 86.0964  | 362.2074        | 344.1969       | <b>390.2023</b> | 372.1918       | 320.1605 |          | L    | 863.4734 | 862.4781 |          | <b>921.5516</b> | 904.5251        | 903.5411       | 9  |
| 4  | 74.0600  | 463.2551        | 445.2445       | 491.2500        | 473.2395       | 447.2602 | 449.2395 | T    | 762.4257 | 775.4461 | 777.4254 | 808.4676        | 791.4410        | 790.4570       | 8  |
| 5  | 30.0338  | <b>520.2766</b> | 502.2660       | 548.2715        | 530.2609       |          |          | G    |          |          |          | <b>707.4199</b> | 690.3933        |                | 7  |
| 6  | 86.0964  | <b>633.3606</b> | 615.3501       | 661.3556        | 643.3450       | 605.3293 | 619.3450 | I    | 592.3202 | 605.3406 | 619.3562 | <b>650.3984</b> | <b>633.3719</b> |                | 6  |
| 7  | 70.0651  | 730.4134        | 712.4028       | 758.4083        | 740.3978       | 704.3978 |          | P    | 495.2674 | 494.2722 |          | <b>537.3144</b> | <b>520.2878</b> |                | 5  |
| 8  | 70.0651  | 827.4662        | 809.4556       | 855.4611        | 837.4505       | 801.4505 |          | P    | 398.2146 | 397.2194 |          | 440.2616        | <b>423.2350</b> |                | 4  |
| 9  | 44.0495  | 898.5033        | 880.4927       | 926.4982        | 908.4876       |          |          | A    | 327.1775 |          |          | 343.2088        | <b>326.1823</b> |                | 3  |
| 10 | 70.0651  | 995.5560        | 977.5455       | 1023.5510       | 1005.5404      | 969.5404 |          | P    | 230.1248 | 229.1295 |          | <b>272.1717</b> | 255.1452        |                | 2  |
| 11 | 129.1135 |                 |                |                 |                |          |          | R    | 74.0237  | 73.0284  |          | <b>175.1190</b> | 158.0924        |                | 1  |

| Seq          | ya       | yb       | Seq           | ya       | yb       | Seq            | ya       | yb       |
|--------------|----------|----------|---------------|----------|----------|----------------|----------|----------|
| <b>EL</b>    | 215.1390 | 243.1339 | <b>ELT</b>    | 316.1867 | 344.1816 | <b>ELTG</b>    | 373.2082 | 401.2031 |
| <b>ELTGI</b> | 486.2922 | 514.2871 | <b>ELTGIP</b> | 583.3450 | 611.3399 | <b>ELTGIPP</b> | 680.3978 | 708.3927 |
| <b>LT</b>    | 187.1441 | 215.1390 | <b>LTG</b>    | 244.1656 | 272.1605 | <b>LTGI</b>    | 357.2496 | 385.2445 |
| <b>LTGIP</b> | 454.3024 | 482.2973 | <b>LTGIPP</b> | 551.3552 | 579.3501 | <b>LTGIPPA</b> | 622.3923 | 650.3872 |
| <b>TG</b>    | 131.0815 | 159.0764 | <b>TGI</b>    | 244.1656 | 272.1605 | <b>TGIP</b>    | 341.2183 | 369.2132 |
| <b>TGIPP</b> | 438.2711 | 466.2660 | <b>TGIPPA</b> | 509.3082 | 537.3031 | <b>TGIPPAP</b> | 606.3610 | 634.3559 |
| <b>GI</b>    | 143.1179 | 171.1128 | <b>GIP</b>    | 240.1707 | 268.1656 | <b>GIPP</b>    | 337.2234 | 365.2183 |
| <b>GIPPA</b> | 408.2605 | 436.2554 | <b>GIPPAP</b> | 505.3133 | 533.3082 | <b>IP</b>      | 183.1492 | 211.1441 |
| <b>IPP</b>   | 280.2020 | 308.1969 | <b>IPPA</b>   | 351.2391 | 379.2340 | <b>IPPAP</b>   | 448.2918 | 476.2867 |
| <b>PP</b>    | 167.1179 | 195.1128 | <b>PPA</b>    | 238.1550 | 266.1499 | <b>PPAP</b>    | 335.2078 | 363.2027 |
| <b>PA</b>    | 141.1022 | 169.0972 | <b>PAP</b>    | 238.1550 | 266.1499 | <b>AP</b>      | 141.1022 | 169.0972 |

## Annotated ion spectra of the matched peptides with $p \leq 0.05$ :

CID No.: **54-2601.3**

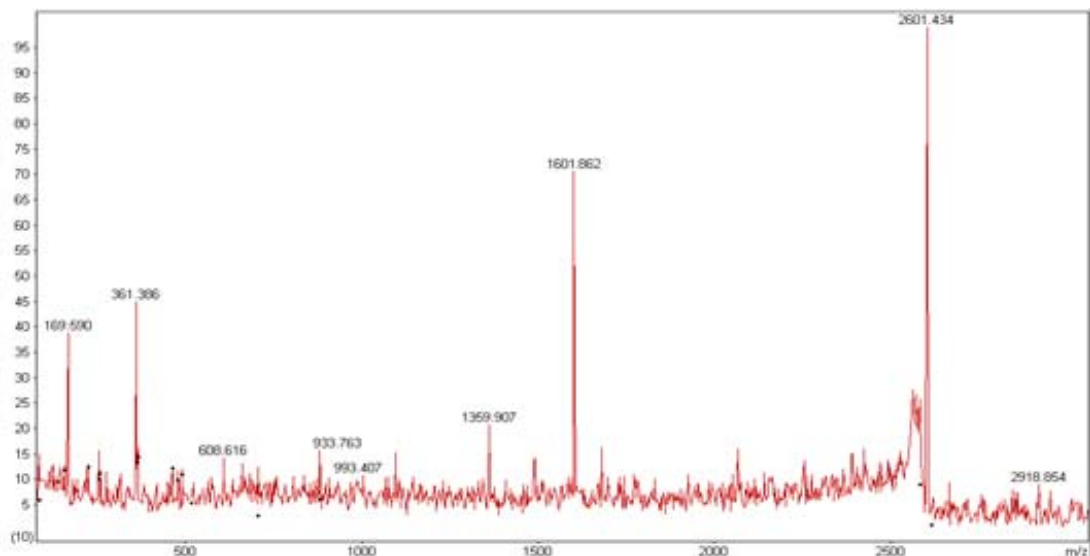

### MS/MS Fragmentation of **K.SEVFSSTFDNQPGVLIQVYEGER.Q**

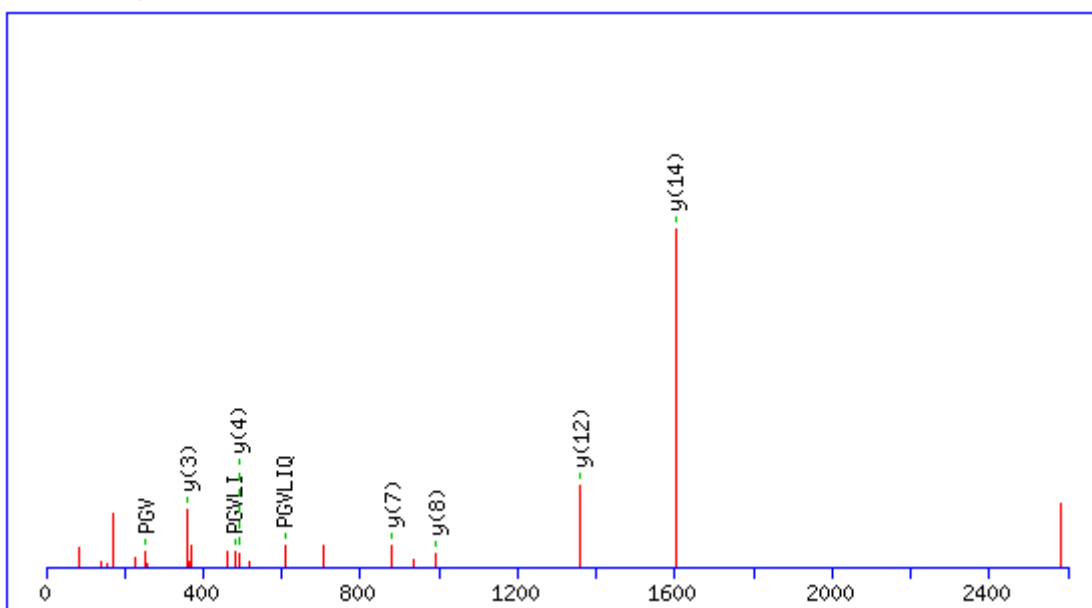

Monoisotopic mass of neutral peptide  $M_r(\text{calc})$ : 1196.6553

| #  | Immon.   | a         | a*        | a <sup>0</sup> | b         | b*        | b <sup>0</sup> | d         | d'       | Seq. | v         | w         | w'        | y         | y*        | y <sup>0</sup> | #  |
|----|----------|-----------|-----------|----------------|-----------|-----------|----------------|-----------|----------|------|-----------|-----------|-----------|-----------|-----------|----------------|----|
| 1  | 60.0444  | 60.0444   |           | 42.0338        | 88.0393   |           | 70.0287        | 44.0495   |          | S    |           |           |           |           |           |                | 23 |
| 2  | 102.0550 | 189.0870  |           | 171.0764       | 217.0819  |           | 199.0713       | 131.0815  |          | E    | 2440.1779 | 2439.1827 |           | 2514.2147 | 2497.1882 | 2496.2041      | 22 |
| 3  | 72.0808  | 288.1554  |           | 270.1448       | 316.1503  |           | 298.1397       | 274.1397  |          | V    | 2341.1095 | 2354.1299 |           | 2385.1721 | 2368.1456 | 2367.1616      | 21 |
| 4  | 120.0808 | 435.2238  |           | 417.2132       | 463.2187  |           | 445.2082       |           |          | F    | 2194.0411 |           |           | 2286.1037 | 2269.0772 | 2268.0931      | 20 |
| 5  | 60.0444  | 522.2558  |           | 504.2453       | 550.2508  |           | 532.2402       | 506.2609  |          | S    | 2107.0091 | 2106.0138 |           | 2139.0353 | 2122.0087 | 2121.0247      | 19 |
| 6  | 74.0600  | 623.3035  |           | 605.2930       | 651.2984  |           | 633.2879       | 607.3086  | 609.2879 | T    | 2005.9614 | 2018.9818 | 2020.9611 | 2052.0033 | 2034.9767 | 2033.9927      | 18 |
| 7  | 120.0808 | 770.3719  |           | 752.3614       | 798.3668  |           | 780.3563       |           |          | F    | 1858.8930 |           |           | 1950.9556 | 1933.9290 | 1932.9450      | 17 |
| 8  | 60.0444  | 857.4040  |           | 839.3934       | 885.3989  |           | 867.3883       | 841.4090  |          | S    | 1771.8610 | 1770.8657 |           | 1803.8872 | 1786.8606 | 1785.8766      | 16 |
| 9  | 88.0393  | 972.4309  |           | 954.4203       | 1000.4258 |           | 982.4153       | 928.4411  |          | D    | 1656.8340 | 1655.8388 |           | 1716.8551 | 1699.8286 | 1698.8446      | 15 |
| 10 | 87.0553  | 1086.4738 | 1069.4473 | 1068.4633      | 1114.4687 | 1097.4422 | 1096.4582      | 1043.4680 |          | N    | 1542.7911 | 1541.7958 |           | 1601.8282 | 1584.8016 | 1583.8176      | 14 |
| 11 | 101.0709 | 1214.5324 | 1197.5059 | 1196.5218      | 1242.5273 | 1225.5008 | 1224.5168      | 1157.5109 |          | Q    | 1414.7325 | 1413.7373 |           | 1487.7853 | 1470.7587 | 1469.7747      | 13 |
| 12 | 70.0651  | 1311.5852 | 1294.5586 | 1293.5746      | 1339.5801 | 1322.5535 | 1321.5695      | 1285.5695 |          | P    | 1317.6797 | 1316.6845 |           | 1359.7267 | 1342.7001 | 1341.7161      | 12 |
| 13 | 30.0338  | 1368.6066 | 1351.5801 | 1350.5961      | 1396.6016 | 1379.5750 | 1378.5910      |           |          | G    |           |           |           | 1262.6739 | 1245.6474 | 1244.6634      | 11 |
| 14 | 72.0808  | 1467.6750 | 1450.6485 | 1449.6645      | 1495.6700 | 1478.6434 | 1477.6594      | 1453.6594 |          | V    | 1161.5899 | 1174.6103 |           | 1205.6525 | 1188.6259 | 1187.6419      | 10 |
| 15 | 86.0964  | 1580.7591 | 1563.7326 | 1562.7485      | 1608.7540 | 1591.7275 | 1590.7435      | 1538.7122 |          | L    | 1048.5058 | 1047.5106 |           | 1106.5841 | 1089.5575 | 1088.5735      | 9  |



|    |          |           |           |           |           |           |           |           |           |   |          |          |          |          |          |          |   |
|----|----------|-----------|-----------|-----------|-----------|-----------|-----------|-----------|-----------|---|----------|----------|----------|----------|----------|----------|---|
| 16 | 86.0964  | 1693.8432 | 1676.8166 | 1675.8326 | 1721.8381 | 1704.8115 | 1703.8275 | 1665.8119 | 1679.8275 | I | 935.4217 | 948.4421 | 962.4578 | 993.5000 | 976.4734 | 975.4894 | 8 |
| 17 | 101.0709 | 1821.9018 | 1804.8752 | 1803.8912 | 1849.8967 | 1832.8701 | 1831.8861 | 1764.8803 |           | Q | 807.3632 | 806.3679 |          | 880.4159 | 863.3894 | 862.4054 | 7 |
| 18 | 72.0808  | 1920.9702 | 1903.9436 | 1902.9596 | 1948.9651 | 1931.9385 | 1930.9545 | 1906.9545 |           | V | 708.2947 | 721.3151 |          | 752.3573 | 735.3308 | 734.3468 | 6 |
| 19 | 136.0757 | 2084.0335 | 2067.0069 | 2066.0229 | 2112.0284 | 2095.0019 | 2094.0178 |           |           | Y | 545.2314 |          |          | 653.2889 | 636.2624 | 635.2784 | 5 |
| 20 | 102.0550 | 2213.0761 | 2196.0495 | 2195.0655 | 2241.0710 | 2224.0445 | 2223.0604 | 2155.0706 |           | E | 416.1888 | 415.1936 |          | 490.2256 | 473.1991 | 472.2150 | 4 |
| 21 | 30.0338  | 2270.0976 | 2253.0710 | 2252.0870 | 2298.0925 | 2281.0659 | 2280.0819 |           |           | G |          |          |          | 361.1830 | 344.1565 | 343.1724 | 3 |
| 22 | 102.0550 | 2399.1401 | 2382.1136 | 2381.1296 | 2427.1351 | 2410.1085 | 2409.1245 | 2341.1347 |           | E | 230.1248 | 229.1295 |          | 304.1615 | 287.1350 | 286.1510 | 2 |
| 23 | 129.1135 |           |           |           |           |           |           |           |           | R | 74.0237  | 73.0284  |          | 175.1190 | 158.0924 |          | 1 |

| Seq    | ya       | yb       | Seq     | ya       | yb       | Seq     | ya       | yb       |
|--------|----------|----------|---------|----------|----------|---------|----------|----------|
| EV     | 201.1234 | 229.1183 | EVF     | 348.1918 | 376.1867 | EVFS    | 435.2238 | 463.2187 |
| EVFST  | 536.2715 | 564.2664 | EVFSTF  | 683.3399 | 711.3348 | VF      | 219.1492 | 247.1441 |
| VFS    | 306.1812 | 334.1761 | VFST    | 407.2289 | 435.2238 | VFSTF   | 554.2973 | 582.2922 |
| VFSTFS | 641.3293 | 669.3243 | FS      | 207.1128 | 235.1077 | FST     | 308.1605 | 336.1554 |
| FSTF   | 455.2289 | 483.2238 | FSTFS   | 542.2609 | 570.2558 | FSTFSD  | 657.2879 | 685.2828 |
| ST     | 161.0921 | 189.0870 | STF     | 308.1605 | 336.1554 | STFS    | 395.1925 | 423.1874 |
| STFSD  | 510.2195 | 538.2144 | STFSDN  | 624.2624 | 652.2573 | TF      | 221.1285 | 249.1234 |
| TFS    | 308.1605 | 336.1554 | TFSD    | 423.1874 | 451.1823 | TFSDN   | 537.2304 | 565.2253 |
| TFSDNQ | 665.2889 | 693.2838 | FS      | 207.1128 | 235.1077 | FSD     | 322.1397 | 350.1347 |
| FSDN   | 436.1827 | 464.1776 | FSDNQ   | 564.2413 | 592.2362 | FSDNQP  | 661.2940 | 689.2889 |
| SD     | 175.0713 | 203.0662 | SDN     | 289.1143 | 317.1092 | SDNQ    | 417.1728 | 445.1678 |
| SDNQP  | 514.2256 | 542.2205 | SDNQPG  | 571.2471 | 599.2420 | SDNQPGV | 670.3155 | 698.3104 |
| DN     | 202.0822 | 230.0771 | DNQ     | 330.1408 | 358.1357 | DNQP    | 427.1936 | 455.1885 |
| DNQPG  | 484.2150 | 512.2100 | DNQPGV  | 583.2835 | 611.2784 | DNQPGVL | 696.3675 | 724.3624 |
| NQ     | 215.1139 | 243.1088 | NQP     | 312.1666 | 340.1615 | NQPG    | 369.1881 | 397.1830 |
| NQPGV  | 468.2565 | 496.2514 | NQPGVL  | 581.3406 | 609.3355 | NQPGVLI | 694.4246 | 722.4196 |
| QP     | 198.1237 | 226.1186 | QPG     | 255.1452 | 283.1401 | QPGV    | 354.2136 | 382.2085 |
| QPGVL  | 467.2976 | 495.2926 | QPGVLI  | 580.3817 | 608.3766 | PG      | 127.0866 | 155.0815 |
| PGV    | 226.1550 | 254.1499 | PGVL    | 339.2391 | 367.2340 | PGVLI   | 452.3231 | 480.3180 |
| PGVLIQ | 580.3817 | 608.3766 | PGVLIQV | 679.4501 | 707.4450 | GV      | 129.1022 | 157.0972 |
| GVL    | 242.1863 | 270.1812 | GVLI    | 355.2704 | 383.2653 | GVLIQ   | 483.3289 | 511.3239 |
| GVLIQV | 582.3974 | 610.3923 | VL      | 185.1648 | 213.1598 | VLI     | 298.2489 | 326.2438 |
| VLIQ   | 426.3075 | 454.3024 | VLIQV   | 525.3759 | 553.3708 | VLIQVY  | 688.4392 | 716.4341 |
| LI     | 199.1805 | 227.1754 | LIQ     | 327.2391 | 355.2340 | LIQV    | 426.3075 | 454.3024 |
| LIQVY  | 589.3708 | 617.3657 | IQ      | 214.1550 | 242.1499 | IQV     | 313.2234 | 341.2183 |
| IQVY   | 476.2867 | 504.2817 | IQVYE   | 605.3293 | 633.3243 | IQVYEG  | 662.3508 | 690.3457 |
| QV     | 200.1394 | 228.1343 | QVY     | 363.2027 | 391.1976 | QVYE    | 492.2453 | 520.2402 |
| QVYEG  | 549.2667 | 577.2617 | QVYEGE  | 678.3093 | 706.3042 | VY      | 235.1441 | 263.1390 |
| VYE    | 364.1867 | 392.1816 | VYEG    | 421.2082 | 449.2031 | VYEGE   | 550.2508 | 578.2457 |
| YE     | 265.1183 | 293.1132 | YEG     | 322.1397 | 350.1347 | YEGE    | 451.1823 | 479.1773 |
| EG     | 159.0764 | 187.0713 | EGE     | 288.1190 | 316.1139 | GE      | 159.0764 | 187.0713 |

Spot No.: **55**

Mascot score: **109**

Species: *Fusarium oxysporum Fo5176*

Protein name: **actin lateral binding protein(Tropomyosin)**

NCBI accession No.: **gi| 342881318**      Sequence coverage %: **69**

Matched peptides No.: **16**      Total peptides No.: **89**

Calculated Mr: **18809**      Calculated pI: **4.84**

### Annotated PMF spectra:

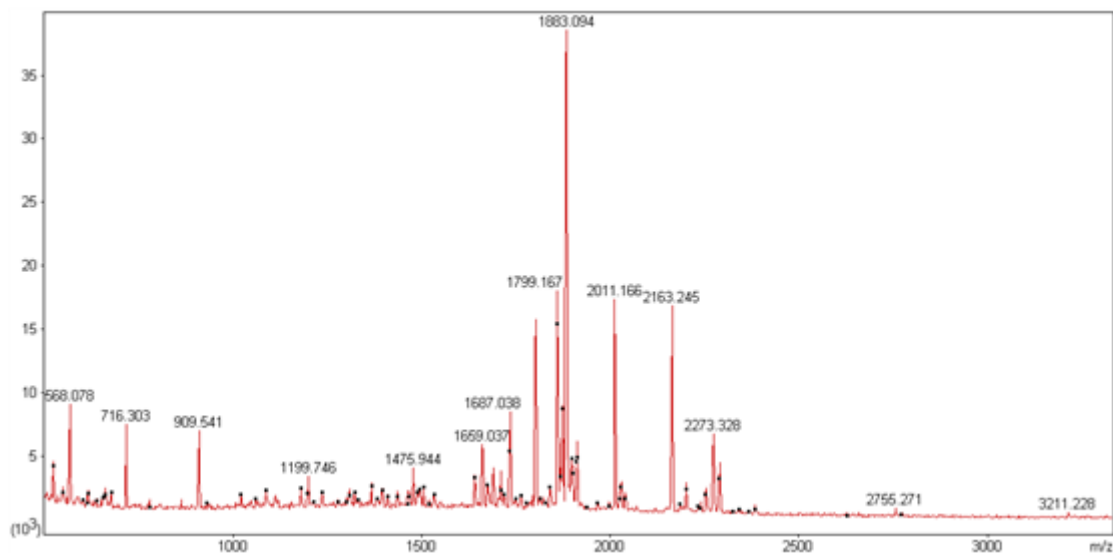

### Probability Based Mowse Score:

Protein score is  $-10 \cdot \log(P)$ , where P is the probability that the observed match is a random event. Protein scores greater than 75 are significant ( $p < 0.05$ ).

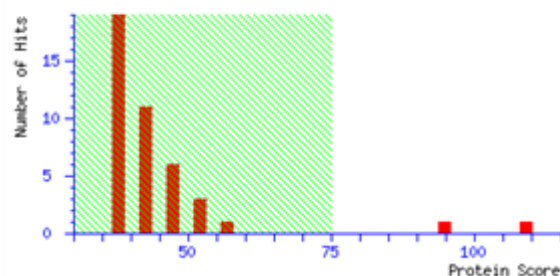

Matched peptide sequences: shown in **Bold Red**

1 MDRIKE**KMNQ** LRLEADEASG **KVEELQSKVK** VLEQENLSKE QEITSLQHK**N**  
 51 **NLLEGEVEKL** ENAVK**DFKKA** ADEGQQHG**TQ** NETLQRR**LQ** LEEEAEDAD**K**  
 101 **TLREANEKLR** QIDVKAGH**FE** RKVQALENER DQWESKY**EEM** SQKYNALQ**KE**  
 151 LEELQAEIGN I

Matched peptides information:

| Start - End | Observed  | Mr (expt) | Mr (calc) | ppm   | M | Peptide                                   |
|-------------|-----------|-----------|-----------|-------|---|-------------------------------------------|
| 8 - 12      | 661.2949  | 660.2876  | 660.3377  | -75.8 | 0 | K.M <b>NI</b> QLR.L                       |
| 8 - 12      | 677.2972  | 676.2899  | 676.3326  | -63.2 | 0 | K.M <b>NI</b> QLR.L + Oxidation (0)       |
| 22 - 30     | 1059.6364 | 1058.6291 | 1058.5972 | 30.2  | 1 | K.V <b>EE</b> LQSKVK.V                    |
| 31 - 49     | 2253.3065 | 2252.2992 | 2252.1648 | 59.7  | 1 | K.V <b>LE</b> QENLS <b>RE</b> QEITSLQHK.N |
| 40 - 49     | 1212.7576 | 1211.7503 | 1211.6146 | 112   | 0 | K.E <b>QE</b> ITSLQHK.N                   |
| 50 - 65     | 1799.1667 | 1798.1594 | 1797.9472 | 118   | 1 | K.N <b>NI</b> LEGEVEKLENAVK.D             |
| 69 - 86     | 2011.1663 | 2010.1590 | 2009.9515 | 103   | 1 | K.K <b>AA</b> DEQQHG <b>TQ</b> NETLQR.R   |
| 70 - 86     | 1883.0942 | 1882.0869 | 1881.8565 | 122   | 0 | K.A <b>AA</b> DEQQHG <b>TQ</b> NETLQR.R   |
| 70 - 87     | 2039.1972 | 2038.1899 | 2037.9576 | 114   | 1 | K.A <b>AA</b> DEQQHG <b>TQ</b> NETLQR.L   |
| 87 - 100    | 1659.0369 | 1658.0296 | 1657.8158 | 129   | 1 | R.R <b>LQ</b> LEEEAEDADK.T                |
| 88 - 100    | 1502.9069 | 1501.8996 | 1501.7147 | 123   | 0 | R.L <b>Q</b> LEEEAEDADK.T                 |
| 88 - 103    | 1873.1659 | 1872.1586 | 1871.9476 | 113   | 1 | R.L <b>Q</b> LEEEAEDADK <b>TLR</b> .E     |
| 116 - 121   | 716.3030  | 715.2957  | 715.3402  | -62.2 | 0 | K.A <b>GH</b> FER.K                       |
| 122 - 130   | 1086.7206 | 1085.7133 | 1085.5829 | 120   | 1 | R.R <b>VQ</b> ALENER.D                    |
| 123 - 136   | 1732.0531 | 1731.0458 | 1730.8223 | 129   | 1 | K.V <b>Q</b> ALENERDQWESK.Y               |
| 137 - 143   | 930.4523  | 929.4450  | 929.3800  | 69.9  | 0 | K.Y <b>EE</b> MSQK.Y + Oxidation (0)      |

Spot No.: **56**

NCBI accession No.: **gi/475674506**

Plant species: ***Fusarium oxysporum f. sp. cubense race 4***

Protein name: **Peroxiredoxin-1**

Mascot score: **127**

Sequence coverage %: **14**

The number of matched peptides with  $p \leq 0.05$ : **4**

Calculated Mr: **23683**

Calculated Pi: **5.14**

### Annotated MS spectra:

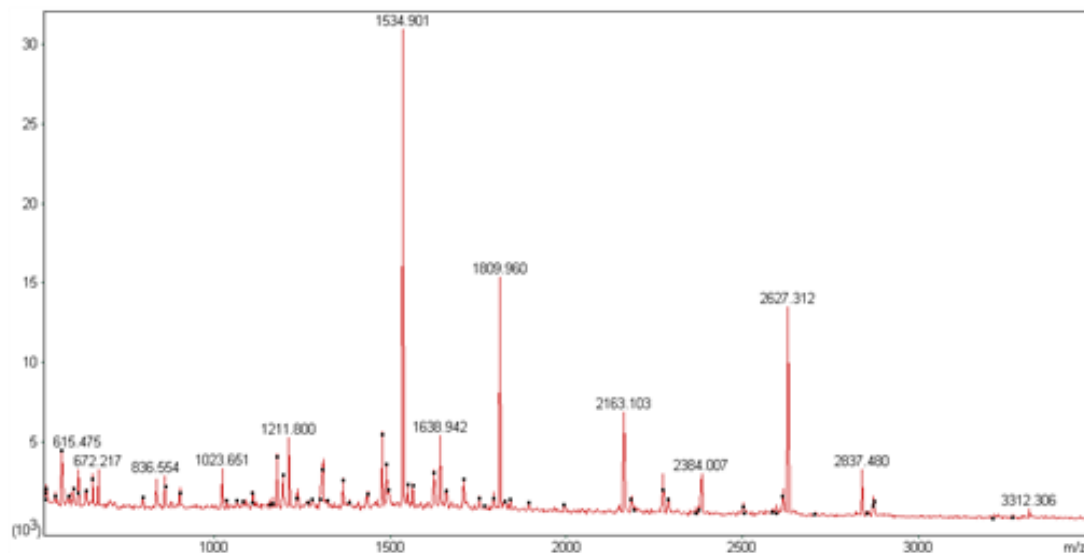

### Probability Based Mowse Score:

Ions score is  $-10 \cdot \log(P)$ , where  $P$  is the probability that the observed match is a random event. Individual ions scores  $> 47$  indicate identity or extensive homology ( $p < 0.05$ ). Protein scores are derived from ions scores as a non-probabilistic basis for ranking protein hits.

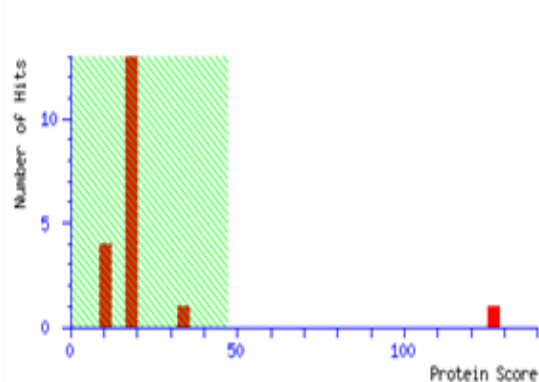

Matched peptide sequences: shown in **Bold Red**

```

1  MSSAFVQRPA PDFSATTLEP GGEFRDIKLS DFKGQWVVLL FYPMDFTFVC
51 PTEIIQYNNA LDRFREINTT VLGVSTDSHF THLAWVEKPR KQGGLGPDLE
101 LPLVADKSTK ISRSYGVLE DEGIALRGLF IIDPKGVLKQ ITVNDLPVGR
151 DVEETIRLVK AFQFTDEYGE VCPAGWQEGG KTMKADPKGS LEYFSEQGEN
201 GESRKRPRTE

```

Matched peptides information:

| Query              | Start - End | Observed  | Mr(expt)  | Mr(calc)  | ppm  | H | Score | Expect | Rank              | U | Peptide             |
|--------------------|-------------|-----------|-----------|-----------|------|---|-------|--------|-------------------|---|---------------------|
| <a href="#">#1</a> | 9 - 25      | 1859.9600 | 1808.9527 | 1808.8734 | 43.9 | 0 | 64    | 0.0011 | <a href="#">1</a> | U | R.PAQPASATTLFPOGR.D |
| <a href="#">#2</a> | 9 - 25      | 1859.9600 | 1808.9527 | 1808.8734 | 43.9 | 0 | 64    | 0.0011 | <a href="#">1</a> | U | R.PAQPASATTLFPOGR.D |
| <a href="#">#3</a> | 114 - 127   | 1534.9010 | 1533.8937 | 1533.8038 | 59.6 | 0 | 63    | 0.0018 | <a href="#">1</a> | U | R.SYVLIEDGIALR.G    |
| <a href="#">#4</a> | 114 - 127   | 1534.9010 | 1533.8937 | 1533.8038 | 59.6 | 0 | 63    | 0.0018 | <a href="#">1</a> | U | R.SYVLIEDGIALR.G    |

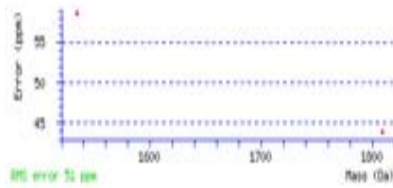

Annotated ion spectra of the matched peptides with  $p \leq 0.05$ :

CID No.: **56-1534.9**

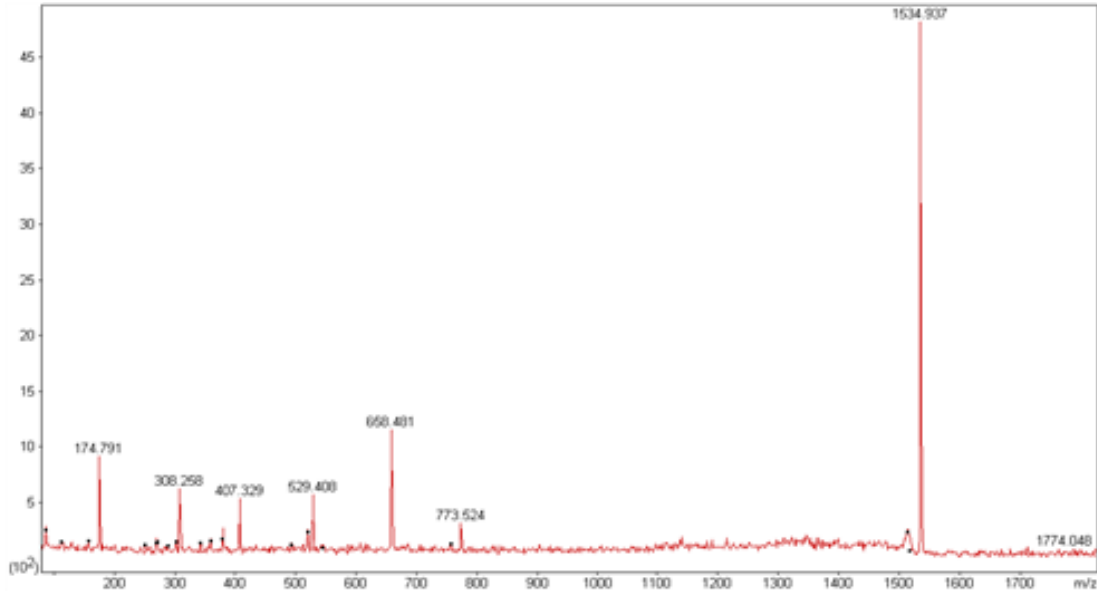

MS/MS Fragmentation of **R.SYGVLIIEDEGIALR.G**

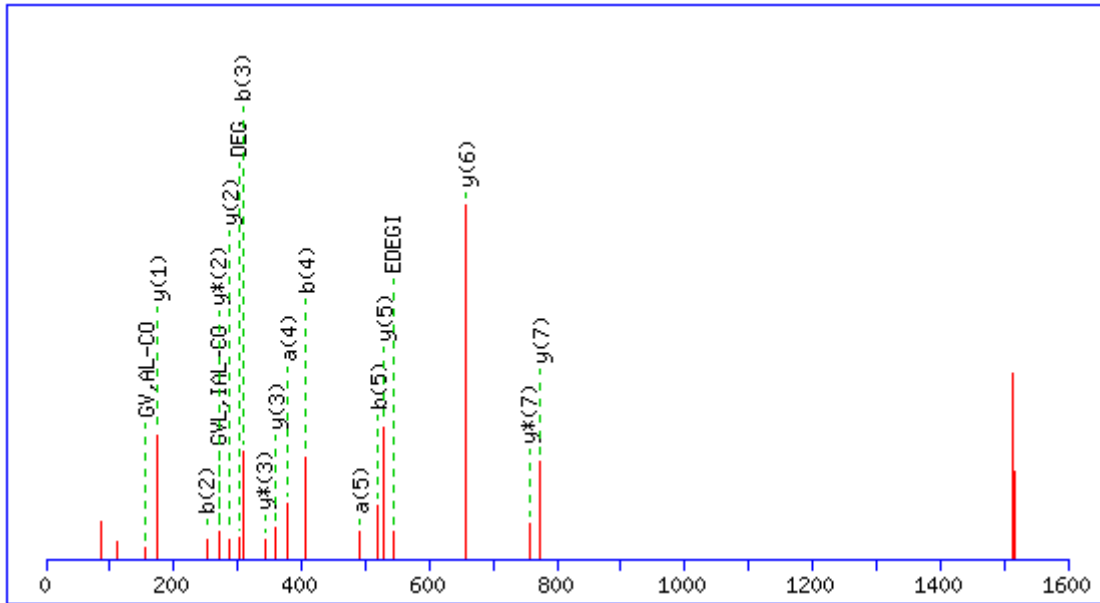

Monoisotopic mass of neutral peptide  $M_r(\text{calc})$ : 1533.8038

| #  | Immon.   | a               | a <sup>0</sup> | b               | b <sup>0</sup> | d         | d'        | Seq. | v         | w         | w'       | y               | y*              | y <sup>0</sup> | #  |
|----|----------|-----------------|----------------|-----------------|----------------|-----------|-----------|------|-----------|-----------|----------|-----------------|-----------------|----------------|----|
| 1  | 60.0444  | 60.0444         | 42.0338        | 88.0393         | 70.0287        | 44.0495   |           | S    |           |           |          |                 |                 |                | 14 |
| 2  | 136.0757 | 223.1077        | 205.0972       | <b>251.1026</b> | 233.0921       |           |           | Y    | 1339.7216 |           |          | 1447.7791       | 1430.7526       | 1429.7686      | 13 |
| 3  | 30.0338  | 280.1292        | 262.1186       | <b>308.1241</b> | 290.1135       |           |           | G    |           |           |          | 1284.7158       | 1267.6892       | 1266.7052      | 12 |
| 4  | 72.0808  | <b>379.1976</b> | 361.1870       | <b>407.1925</b> | 389.1819       | 365.1819  |           | V    | 1183.6317 | 1196.6521 |          | 1227.6943       | 1210.6678       | 1209.6838      | 11 |
| 5  | 86.0964  | <b>492.2817</b> | 474.2711       | <b>520.2766</b> | 502.2660       | 450.2347  |           | L    | 1070.5477 | 1069.5524 |          | 1128.6259       | 1111.5994       | 1110.6153      | 10 |
| 6  | 86.0964  | 605.3657        | 587.3552       | 633.3606        | 615.3501       | 577.3344  | 591.3501  | I    | 957.4636  | 970.4840  | 984.4997 | 1015.5419       | 998.5153        | 997.5313       | 9  |
| 7  | 102.0550 | 734.4083        | 716.3978       | 762.4032        | 744.3927       | 676.4028  |           | E    | 828.4210  | 827.4258  |          | 902.4578        | 885.4312        | 884.4472       | 8  |
| 8  | 88.0393  | 849.4353        | 831.4247       | 877.4302        | 859.4196       | 805.4454  |           | D    | 713.3941  | 712.3988  |          | <b>773.4152</b> | <b>756.3886</b> | 755.4046       | 7  |
| 9  | 102.0550 | 978.4779        | 960.4673       | 1006.4728       | 988.4622       | 920.4724  |           | E    | 584.3515  | 583.3562  |          | <b>658.3883</b> | 641.3617        | 640.3777       | 6  |
| 10 | 30.0338  | 1035.4993       | 1017.4888      | 1063.4942       | 1045.4837      |           |           | G    |           |           |          | <b>529.3457</b> | 512.3191        |                | 5  |
| 11 | 86.0964  | 1148.5834       | 1130.5728      | 1176.5783       | 1158.5677      | 1120.5521 | 1134.5677 | I    | 414.2459  | 427.2663  | 441.2820 | 472.3242        | 455.2976        |                | 4  |
| 12 | 44.0495  | 1219.6205       | 1201.6099      | 1247.6154       | 1229.6048      |           |           | A    | 343.2088  |           |          | <b>359.2401</b> | <b>342.2136</b> |                | 3  |
| 13 | 86.0964  | 1332.7046       | 1314.6940      | 1360.6995       | 1342.6889      | 1290.6576 |           | L    | 230.1248  | 229.1295  |          | <b>288.2030</b> | <b>271.1765</b> |                | 2  |
| 14 | 129.1135 |                 |                |                 |                |           |           | R    | 74.0237   | 73.0284   |          | <b>175.1190</b> | 158.0924        |                | 1  |

| Seq           | ya              | yb              | Seq            | ya              | yb              | Seq            | ya              | yb              |
|---------------|-----------------|-----------------|----------------|-----------------|-----------------|----------------|-----------------|-----------------|
| <b>YG</b>     | 193.0972        | 221.0921        | <b>YGV</b>     | 292.1656        | 320.1605        | <b>YGVL</b>    | 405.2496        | 433.2445        |
| <b>YGVLI</b>  | 518.3337        | 546.3286        | <b>YGV LIE</b> | 647.3763        | 675.3712        | <b>GV</b>      | 129.1022        | <b>157.0972</b> |
| <b>GVL</b>    | 242.1863        | <b>270.1812</b> | <b>GVLI</b>    | 355.2704        | 383.2653        | <b>GVLIE</b>   | 484.3130        | 512.3079        |
| <b>GVLIED</b> | 599.3399        | 627.3348        | <b>VL</b>      | 185.1648        | 213.1598        | <b>VLI</b>     | 298.2489        | 326.2438        |
| <b>VLIE</b>   | 427.2915        | 455.2864        | <b>VLIED</b>   | 542.3184        | 570.3134        | <b>V LIEDE</b> | 671.3610        | 699.3559        |
| <b>LI</b>     | 199.1805        | 227.1754        | <b>LIE</b>     | 328.2231        | 356.2180        | <b>LIED</b>    | 443.2500        | 471.2449        |
| <b>LIEDE</b>  | 572.2926        | 600.2875        | <b>LIEDEG</b>  | 629.3141        | 657.3090        | <b>IE</b>      | 215.1390        | 243.1339        |
| <b>IED</b>    | 330.1660        | 358.1609        | <b>IEDE</b>    | 459.2086        | 487.2035        | <b>IEDEG</b>   | 516.2300        | <b>544.2249</b> |
| <b>IEDEGI</b> | 629.3141        | 657.3090        | <b>ED</b>      | 217.0819        | 245.0768        | <b>EDE</b>     | 346.1245        | 374.1194        |
| <b>EDEG</b>   | 403.1460        | 431.1409        | <b>EDEGI</b>   | 516.2300        | <b>544.2249</b> | <b>EDEGIA</b>  | 587.2671        | 615.2620        |
| <b>DE</b>     | 217.0819        | 245.0768        | <b>DEG</b>     | 274.1034        | <b>302.0983</b> | <b>DEGI</b>    | 387.1874        | 415.1823        |
| <b>DEGIA</b>  | 458.2245        | 486.2195        | <b>DEGIAL</b>  | 571.3086        | 599.3035        | <b>EG</b>      | 159.0764        | 187.0713        |
| <b>EGI</b>    | 272.1605        | 300.1554        | <b>EGIA</b>    | 343.1976        | 371.1925        | <b>EGIAL</b>   | 456.2817        | 484.2766        |
| <b>GI</b>     | 143.1179        | 171.1128        | <b>GIA</b>     | 214.1550        | 242.1499        | <b>GIAL</b>    | 327.2391        | 355.2340        |
| <b>IA</b>     | <b>157.1335</b> | 185.1285        | <b>IAL</b>     | <b>270.2176</b> | 298.2125        | <b>AL</b>      | <b>157.1335</b> | 185.1285        |

## Annotated ion spectra of the matched peptides with $p \leq 0.05$ :

CID No.: **56-1809.9**

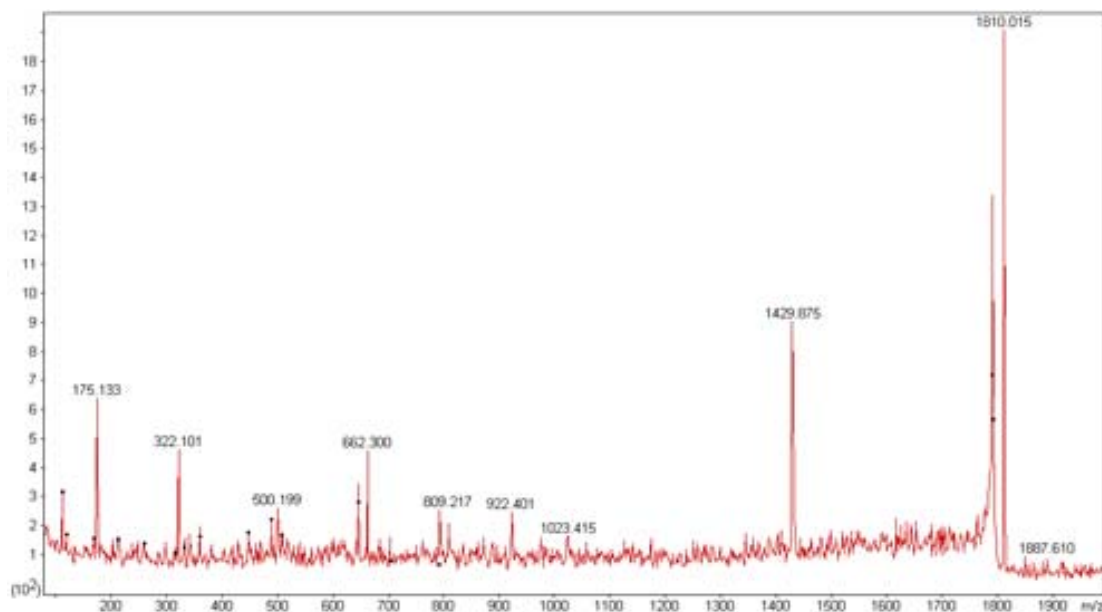

MS/MS Fragmentation of **R.PAPDFSATTLFPGGEFR.D**

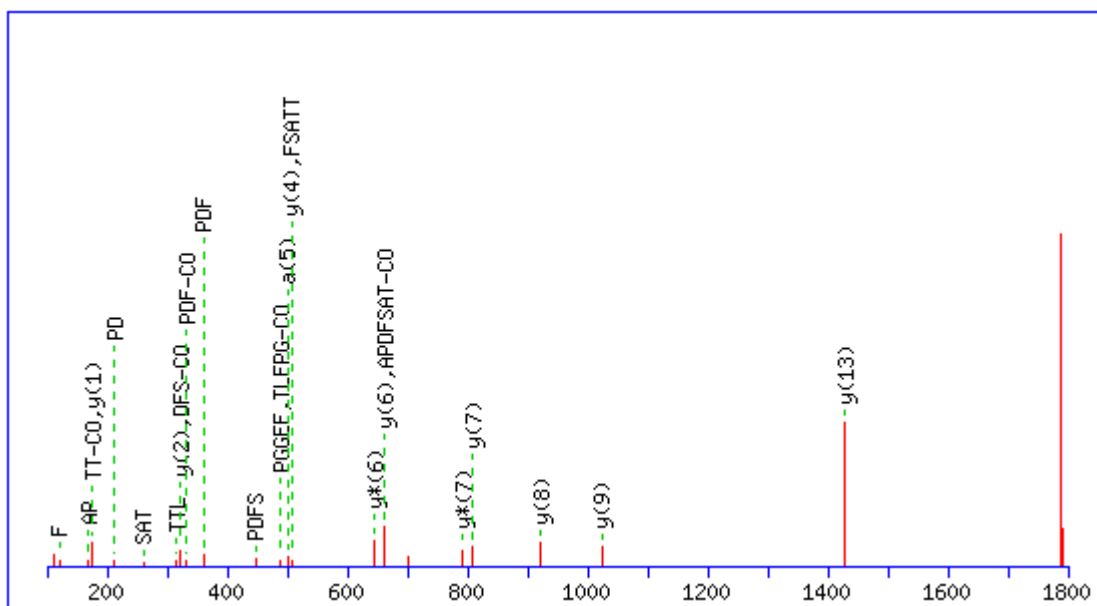

Monoisotopic mass of neutral peptide  $M_r(\text{calc})$ : 1808.8734



| #  | Immon.   | a         | a <sup>0</sup> | b         | b <sup>0</sup> | d         | d'       | Seq. | v         | w         | w'        | y         | y*        | y <sup>0</sup> | #  |
|----|----------|-----------|----------------|-----------|----------------|-----------|----------|------|-----------|-----------|-----------|-----------|-----------|----------------|----|
| 1  | 70.0651  | 70.0651   |                | 98.0600   |                | 44.0495   |          | P    |           |           |           |           |           |                | 17 |
| 2  | 44.0495  | 141.1022  |                | 169.0972  |                |           |          | A    | 1696.7966 |           |           | 1712.8279 | 1695.8013 | 1694.8173      | 16 |
| 3  | 70.0651  | 238.1550  |                | 266.1499  |                | 212.1394  |          | P    | 1599.7438 | 1598.7486 |           | 1641.7907 | 1624.7642 | 1623.7802      | 15 |
| 4  | 88.0393  | 353.1819  | 335.1714       | 381.1769  | 363.1663       | 309.1921  |          | D    | 1484.7169 | 1483.7216 |           | 1544.7380 | 1527.7114 | 1526.7274      | 14 |
| 5  | 120.0808 | 500.2504  | 482.2398       | 528.2453  | 510.2347       |           |          | F    | 1337.6484 |           |           | 1429.7110 | 1412.6845 | 1411.7005      | 13 |
| 6  | 60.0444  | 587.2824  | 569.2718       | 615.2773  | 597.2667       | 571.2875  |          | S    | 1250.6164 | 1249.6212 |           | 1282.6426 | 1265.6161 | 1264.6321      | 12 |
| 7  | 44.0495  | 658.3195  | 640.3089       | 686.3144  | 668.3039       |           |          | A    | 1179.5793 |           |           | 1195.6106 | 1178.5841 | 1177.6000      | 11 |
| 8  | 74.0600  | 759.3672  | 741.3566       | 787.3621  | 769.3515       | 743.3723  | 745.3515 | T    | 1078.5316 | 1091.5520 | 1093.5313 | 1124.5735 | 1107.5469 | 1106.5629      | 10 |
| 9  | 74.0600  | 860.4149  | 842.4043       | 888.4098  | 870.3992       | 844.4199  | 846.3992 | T    | 977.4839  | 990.5043  | 992.4836  | 1023.5258 | 1006.4993 | 1005.5152      | 9  |
| 10 | 86.0964  | 973.4989  | 955.4884       | 1001.4938 | 983.4833       | 931.4520  |          | L    | 864.3999  | 863.4046  |           | 922.4781  | 905.4516  | 904.4676       | 8  |
| 11 | 120.0808 | 1120.5673 | 1102.5568      | 1148.5623 | 1130.5517      |           |          | F    | 717.3315  |           |           | 809.3941  | 792.3675  | 791.3835       | 7  |
| 12 | 70.0651  | 1217.6201 | 1199.6095      | 1245.6150 | 1227.6045      | 1191.6045 |          | P    | 620.2787  | 619.2835  |           | 662.3257  | 645.2991  | 644.3151       | 6  |
| 13 | 30.0338  | 1274.6416 | 1256.6310      | 1302.6365 | 1284.6259      |           |          | G    |           |           |           | 565.2729  | 548.2463  | 547.2623       | 5  |
| 14 | 30.0338  | 1331.6630 | 1313.6525      | 1359.6579 | 1341.6474      |           |          | G    |           |           |           | 508.2514  | 491.2249  | 490.2409       | 4  |
| 15 | 102.0550 | 1460.7056 | 1442.6951      | 1488.7005 | 1470.6900      | 1402.7001 |          | E    | 377.1932  | 376.1979  |           | 451.2300  | 434.2034  | 433.2194       | 3  |
| 16 | 120.0808 | 1607.7740 | 1589.7635      | 1635.7690 | 1617.7584      |           |          | F    | 230.1248  |           |           | 322.1874  | 305.1608  |                | 2  |
| 17 | 129.1135 |           |                |           |                |           |          | R    | 74.0237   | 73.0284   |           | 175.1190  | 158.0924  |                | 1  |

| Seq     | ya       | yb       | Seq     | ya       | yb       | Seq     | ya       | yb       |
|---------|----------|----------|---------|----------|----------|---------|----------|----------|
| AP      | 141.1022 | 169.0972 | APD     | 256.1292 | 284.1241 | APDF    | 403.1976 | 431.1925 |
| APDFS   | 490.2296 | 518.2245 | APDFSAT | 561.2667 | 589.2617 | APDFSAT | 662.3144 | 690.3093 |
| PD      | 185.0921 | 213.0870 | PDF     | 332.1605 | 360.1554 | PDFS    | 419.1925 | 447.1874 |
| PDFSA   | 490.2296 | 518.2245 | PDFSAT  | 591.2773 | 619.2722 | PDFSATT | 692.3250 | 720.3199 |
| DF      | 235.1077 | 263.1026 | DFS     | 322.1397 | 350.1347 | DFSA    | 393.1769 | 421.1718 |
| DFSAT   | 494.2245 | 522.2195 | DFSATT  | 595.2722 | 623.2671 | FS      | 207.1128 | 235.1077 |
| FSA     | 278.1499 | 306.1448 | FSAT    | 379.1976 | 407.1925 | FSATT   | 480.2453 | 508.2402 |
| FSATTL  | 593.3293 | 621.3243 | SA      | 131.0815 | 159.0764 | SAT     | 232.1292 | 260.1241 |
| SATT    | 333.1769 | 361.1718 | SATTL   | 446.2609 | 474.2558 | SATTLF  | 593.3293 | 621.3243 |
| SATTLFP | 690.3821 | 718.3770 | AT      | 145.0972 | 173.0921 | ATT     | 246.1448 | 274.1397 |
| ATTL    | 359.2289 | 387.2238 | ATTLF   | 506.2973 | 534.2922 | ATTLFP  | 603.3501 | 631.3450 |
| ATTLFPG | 660.3715 | 688.3665 | TT      | 175.1077 | 203.1026 | TTL     | 288.1918 | 316.1867 |
| TTLF    | 435.2602 | 463.2551 | TTLFP   | 532.3130 | 560.3079 | TTLFPG  | 589.3344 | 617.3293 |
| TTLFPGG | 646.3559 | 674.3508 | TL      | 187.1441 | 215.1390 | TLF     | 334.2125 | 362.2074 |
| TLFP    | 431.2653 | 459.2602 | TLFPG   | 488.2867 | 516.2817 | TLFPGG  | 545.3082 | 573.3031 |
| TLFPGGE | 674.3508 | 702.3457 | LF      | 233.1648 | 261.1598 | LFP     | 330.2176 | 358.2125 |
| LFPG    | 387.2391 | 415.2340 | LFPGG   | 444.2605 | 472.2554 | LFPGGE  | 573.3031 | 601.2980 |
| FP      | 217.1335 | 245.1285 | FPG     | 274.1550 | 302.1499 | FPGG    | 331.1765 | 359.1714 |
| FPGGE   | 460.2191 | 488.2140 | FPGGEF  | 607.2875 | 635.2824 | PG      | 127.0866 | 155.0815 |
| PGG     | 184.1081 | 212.1030 | PGGE    | 313.1506 | 341.1456 | PGGEF   | 460.2191 | 488.2140 |
| GG      | 87.0553  | 115.0502 | GGE     | 216.0979 | 244.0928 | GGEF    | 363.1663 | 391.1612 |
| GE      | 159.0764 | 187.0713 | GEF     | 306.1448 | 334.1397 | EF      | 249.1234 | 277.1183 |

Spot No.: **57**

Mascot score: **79**

Species: *Chaetomium thermophilum var.*

Protein name: **hypothetical protein CTHT\_0057040**

NCBI accession No.: **gi| 340924179**      Sequence coverage %: **51**

Matched peptides No.: **9**      Total peptides No.: **66**

Calculated Mr: **17921**      Calculated pI: **10.69**

### Annotated PMF spectra:

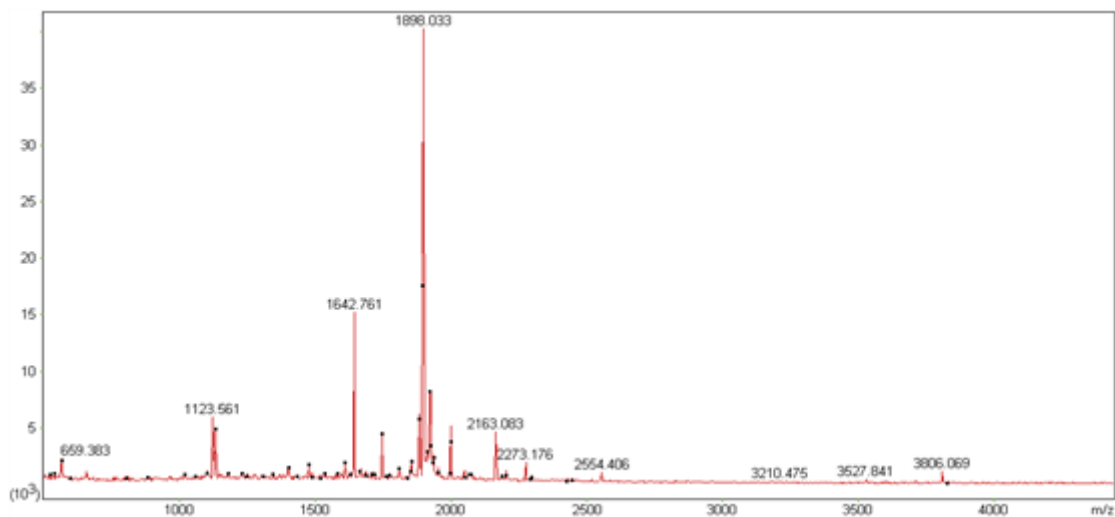

### Probability Based Mowse Score:

Protein score is  $-10 \cdot \log(P)$ , where P is the probability that the observed match is a random event. Protein scores greater than 75 are significant ( $p < 0.05$ ).

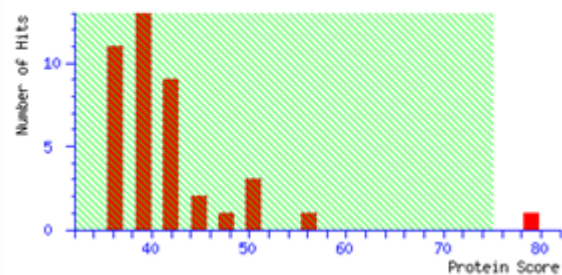

Matched peptide sequences: shown in **Bold Red**

1 **MAPTANTKQR** RGRGAATTAD SDSAIEYQAY NGRRLREASAA RARLKKAQEN  
51 **RNQRRAALSA AHSAAIARVE ARLRSSIAKH HALRSAILLS HLNRLREALQ**  
101 **RRDSILTQIA NKVAAQRRRM LNLGIQLSTL YEGRKEDIKG LIAELNGEKD**  
151 **PDTEEQELIR** G

Matched peptides information:

| Start - End | Observed  | Mr (expt) | Mr (calc) | ppm   | M | Peptide                              |
|-------------|-----------|-----------|-----------|-------|---|--------------------------------------|
| 1 - 10      | 1133.5593 | 1132.5520 | 1132.5659 | -12.2 | 1 | -MAPTANTKQR.R + Oxidation (0)        |
| 56 - 72     | 1664.7681 | 1663.7608 | 1663.9117 | -90.7 | 1 | R.AALSAHSAAIARVEAR.L                 |
| 85 - 94     | 1123.5611 | 1122.5538 | 1122.6509 | -86.5 | 0 | R.SAIIISHLNR.L                       |
| 95 - 101    | 885.4245  | 884.4172  | 884.5192  | -115  | 1 | R.LREALQR.R                          |
| 103 - 112   | 1102.7415 | 1101.7342 | 1101.6030 | 119   | 0 | R.DSILTQIANK.V                       |
| 119 - 134   | 1879.9300 | 1878.9227 | 1878.9985 | -40.3 | 1 | R.RMLNLGIQLSTLYEGR.K + Oxidation (0) |
| 120 - 134   | 1707.8062 | 1706.7989 | 1706.9025 | -60.7 | 0 | R.MLNLIQLSTLYEGR.K                   |
| 120 - 135   | 1851.9429 | 1850.9356 | 1850.9924 | -30.7 | 1 | R.MLNLIQLSTLYEGRK.E + Oxidation (0)  |
| 150 - 161   | 1401.7547 | 1400.7474 | 1400.6419 | 75.3  | 1 | K.DPDTEEQELIR.-                      |

Spot No.: **58**

Mascot score: **77**

Species: *Fusarium oxysporum f. sp. cubense race 1*

Protein name: **Alpha-galactosidase 2**

NCBI accession No.: **gi| 477514377**      Sequence coverage %: **27**

Matched peptides No.: **15**      Total peptides No.: **50**

Calculated Mr: **82979**      Calculated pI: **5.13**

### Annotated PMF spectra:

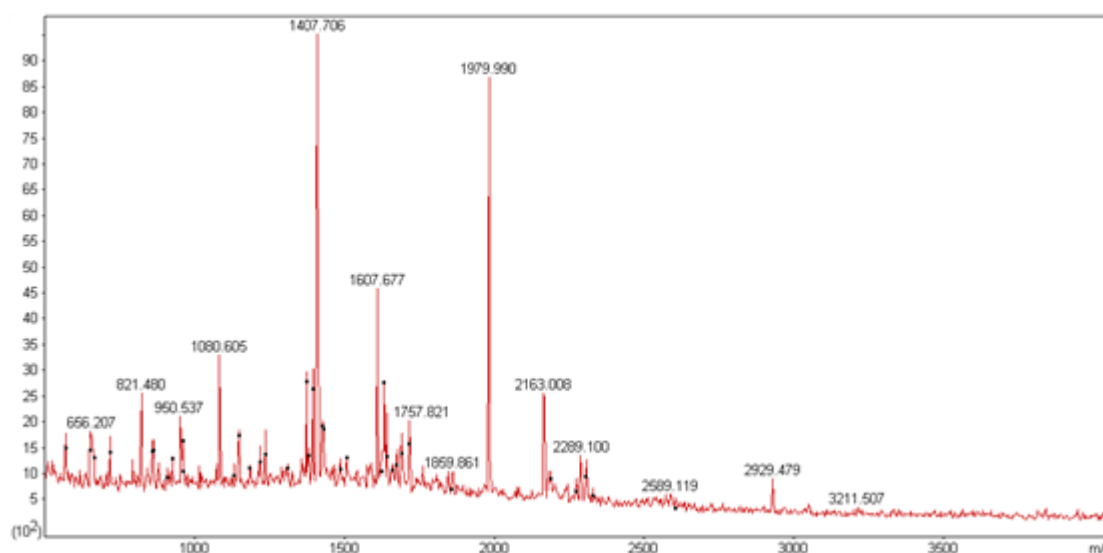

### Probability Based Mowse Score:

Protein score is  $-10 \cdot \log(P)$ , where P is the probability that the observed match is a random event. Protein scores greater than 75 are significant ( $p < 0.05$ ).

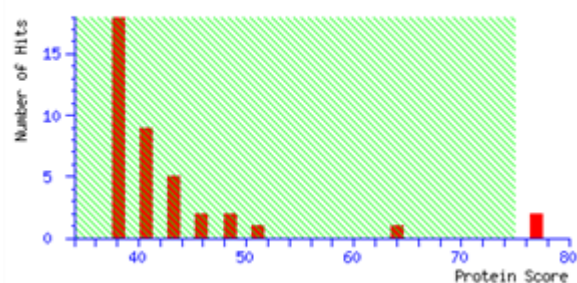

Matched peptide sequences: shown in **Bold Red**

```

1  MVLVTSKGIT  TAAVLCQVI  SAFAESSDPI  RVDGTSFALN  GDNVSYRFHV
51 DNTTGLDLIND  HYGGPVAEDG  ITTEIGPIQG  WVNLIQVRR  EFPDHGRGDF
101 RIPAFQLQQA  SGTTVTDFRY  KSHEVVQGKP  GLPGLPSTFG  EADDVSTLVV
151 HMYDNYSSIA  VDLSYSIFPK  YDAIVRSVNI  TNQGNATINL  RKVSSWSVDL
201 QQDNLDLIEI  KGDWAREGMR  VRRKVDFTGQ  GFQSSTGYSS  HLHNPFLALV
251 SSTTTETQGE  AWGFSLVYTG  SFAVDVEKSS  QGLTRAILGL  NPLDFSWPLK
301 AGQTFITTPEV  VSVFSSKGVG  GMSRQFHRLY  RKHLMKSKYA  EETRPVLLNS
351 WEGLAFDINE  TAIEKIAKQS  ADLGIKLFVM  DDGWFGNKYP  RVNDTAGLGD
401 WQPKSRFPD  GLTPLVENVT  DLKVANSSDE  LKFGIWFEP  MVNPESDLYD
451 KHPDWAIHAG  SYPRTETRNQ  LVLNLALPEV  QEFIIDFVSK  VLRESPISYV
501 KWDNNRGIHE  TPNPTLNYKY  MLGLYHFVET  LTSRFPDVLW  EGCASGGGRF
551 DPGVLQWFPQ  IWTSDDTDAV  ERIAIQFGTS  LAYPPSAMGA  HLSHVPNGNT
601 QRITSVKFRA  HVAMMGSFG  VELDPSDLEP  EEREQIPGLI  ELSEKINPIV
651 ITGDFYRLAL  PEETNYPAGQ  FISEDGKKV  LFAFQTRATI  NNSWPWFRLQ
701 GLDASAKYKV  DNNHTVSGST  LMNLGIQLRF  EGDYDSQVLM  IEKQ

```

Matched peptides information:

| Start - End | Observed  | Mr (expt) | Mr (calc) | ppm   | M | Peptide                                                |
|-------------|-----------|-----------|-----------|-------|---|--------------------------------------------------------|
| 32 - 47     | 1714.7763 | 1713.7690 | 1713.7958 | -15.6 | 0 | R.VDGT <b>SFALN</b> GDNVSYR.F                          |
| 91 - 97     | 857.4355  | 856.4283  | 856.3828  | 53.1  | 0 | R.EFPD <b>HGR</b> .G                                   |
| 102 - 119   | 1979.9902 | 1978.9829 | 1979.0113 | -14.3 | 0 | R.IPAP <b>QLQQA</b> SGTTVTDFR.Y                        |
| 192 - 211   | 2330.0526 | 2329.0453 | 2329.2165 | -73.5 | 1 | R.KVSS <b>WSVDL</b> QQDNLDLIEI.K.G                     |
| 332 - 336   | 656.2073  | 655.2000  | 655.3839  | -281  | 1 | R. <b>RKHLMK</b> .S                                    |
| 408 - 423   | 1757.8211 | 1756.8138 | 1756.9247 | -63.1 | 0 | R.FPD <b>GLTPLVENVT</b> DLK.V                          |
| 452 - 464   | 1506.6105 | 1505.6032 | 1505.7164 | -75.2 | 0 | K.HPD <b>WAIHAG</b> SYPR.T                             |
| 535 - 549   | 1607.6771 | 1606.6698 | 1606.7198 | -31.1 | 0 | R.FPD <b>VLM</b> ECCASGGGR.F                           |
| 610 - 633   | 2589.1186 | 2588.1113 | 2588.1523 | -15.8 | 0 | R.A <b>HVAMMGSFG</b> VELDPSDLEPEER.E + Oxidation (0)   |
| 610 - 633   | 2605.1522 | 2604.1449 | 2604.1472 | -0.88 | 0 | R.A <b>HVAMMGSFG</b> VELDPSDLEPEER.E + 2 Oxidation (0) |
| 646 - 657   | 1407.7059 | 1406.6986 | 1406.7558 | -40.6 | 0 | K.INPIVIT <b>GDFYR</b> .L                              |
| 658 - 678   | 2307.0835 | 2306.0762 | 2306.1430 | -29.0 | 1 | R.LAL <b>PEETNYPAGQ</b> FISEDGKK.V                     |
| 679 - 687   | 1080.6052 | 1079.5979 | 1079.6128 | -13.8 | 0 | K.VV <b>LFAFQTR</b> .A                                 |
| 688 - 698   | 1391.6203 | 1390.6130 | 1390.6782 | -46.9 | 0 | R.ATIN <b>SNPWFR</b> .L                                |
| 710 - 729   | 2184.9318 | 2183.9245 | 2184.0957 | -78.4 | 0 | K.VDN <b>HTVSGST</b> LMNLGIQLR.F + Oxidation (0)       |

Spot No.: **59**

NCBI accession No.: **gi/475664853**

Plant species: ***Fusarium oxysporum f. sp. cubense race 4***

Protein name: **Carboxypeptidase cpdS**

Mascot score: **62**

Sequence coverage %: **2**

The number of matched peptides with  $p \leq 0.05$ : **1**

Calculated Mr: **57426**

Calculated Pi: **6.71**

### Annotated MS spectra:

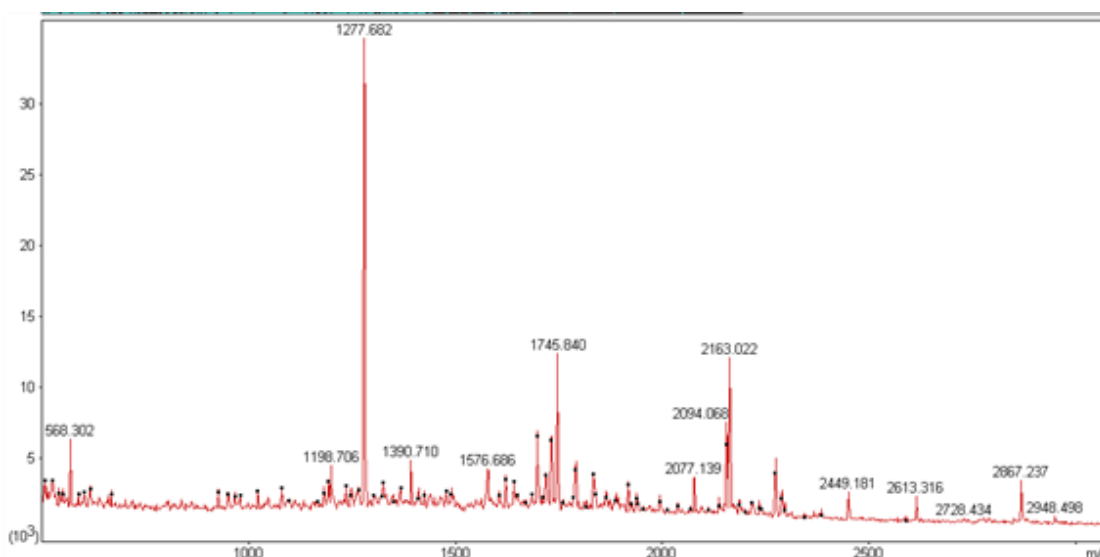

### Probability Based Mowse Score:

Ions score is  $-10 \cdot \log(P)$ , where P is the probability that the observed match is a random event.

Individual ions scores  $> 45$  indicate peptides with significant homology.

Individual ions scores  $> 49$  indicate identity or extensive homology ( $p < 0.05$ ).

Protein scores are derived from ions scores as a non-probabilistic basis for ranking protein hits.

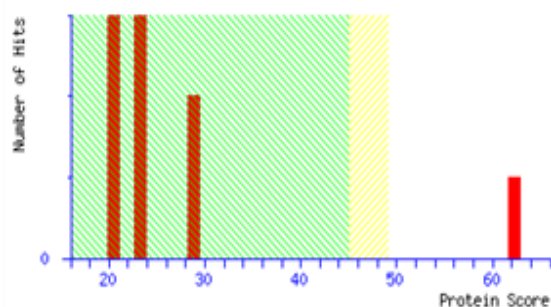

Matched peptide sequences: shown in **Bold Red**

```

1  MGLKTALLSV LGFVALANAS VIHPRTSKPA HAQYYNKKTTS PYYVPSTGIP
51 EVSFDIGESY AGQIPVDWKK TGSKDPKFFY WFFPTVNPAG KDDVVIWFNG
101 GPGCSSLEGL TQENGPFSWK YGTYKVPVNA WSWHKLANVI WVEYPIGTGF
151 STGHVTAMNN TETAAQFVEW WKNLVDTFGL QGKKLYVTGE SYAGVYVPYV
201 GAAMLEKKDK TYYNVKGALY YDPVMPYADK LRLDHAAFPG FFRHWESVFA
251 IPDKNKKILD NDNEKCGLDR YREAHLYPP PPAPWKPVQV KGC DITAHFD
301 EISTVINPCF NVYHVQDTCP VLWDVLGFPS VQYTPPGATL FFNIPGVRKA
351 IHAPAAPKEW ASCSGPVFVG DDDRYDPAEH ETKFQILVEK TNNVMIGSGM
401 ADYIITSNTT ALAVQGLKWN GKQGFQTAPS AEFVVPVINN TESNVENWAG
451 GSVQGSVHSE RGFTLATVKT SGHMVPQYAP PAAFRQLEHI LGRVKSLTDA
501 EPFSVNISTS FKWPY

```

### Matched peptides information:

| Query                                                                             | Start - End | Observed  | Mr (expt) | Mr (calc) | ppm  | # | Score | Expect | Rank | D | Peptide         |
|-----------------------------------------------------------------------------------|-------------|-----------|-----------|-----------|------|---|-------|--------|------|---|-----------------|
|  | 233 - 243   | 1277.6820 | 1276.6747 | 1276.6353 | 30.9 | 0 | 62    | 0.0024 | 1    | 0 | R.LDHAAFVQPPR.H |

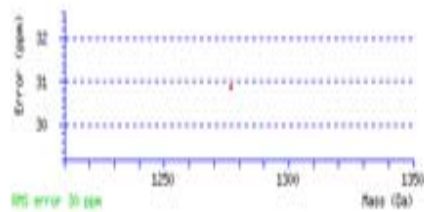

## Annotated ion spectra of the matched peptides with $p \leq 0.05$ :

CID No.: **59-1277.6**

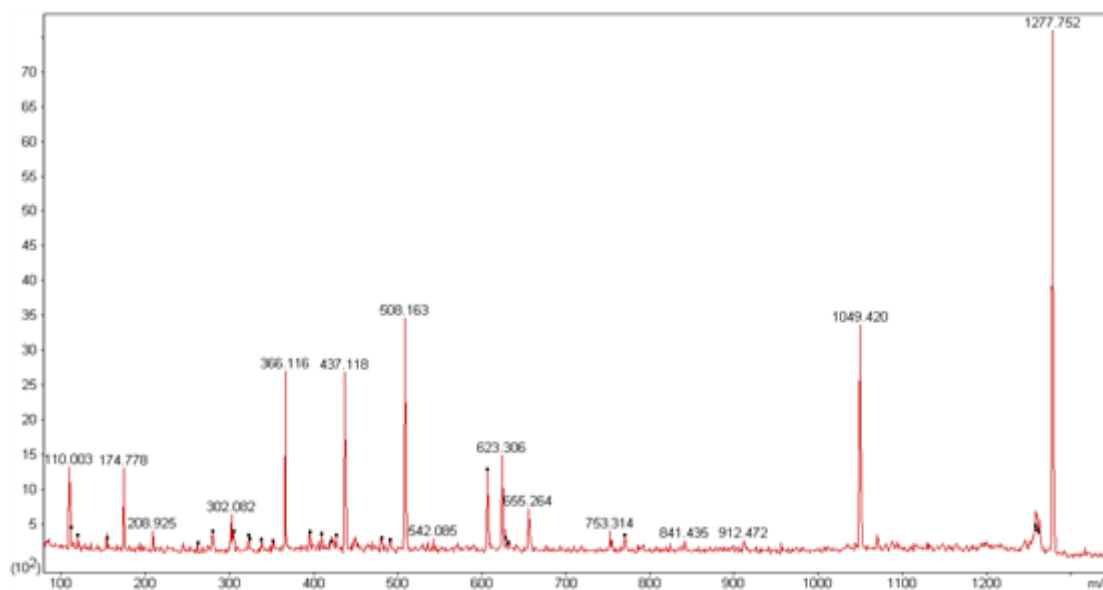

MS/MS Fragmentation of **R.LDHAAFPGFFR.H**

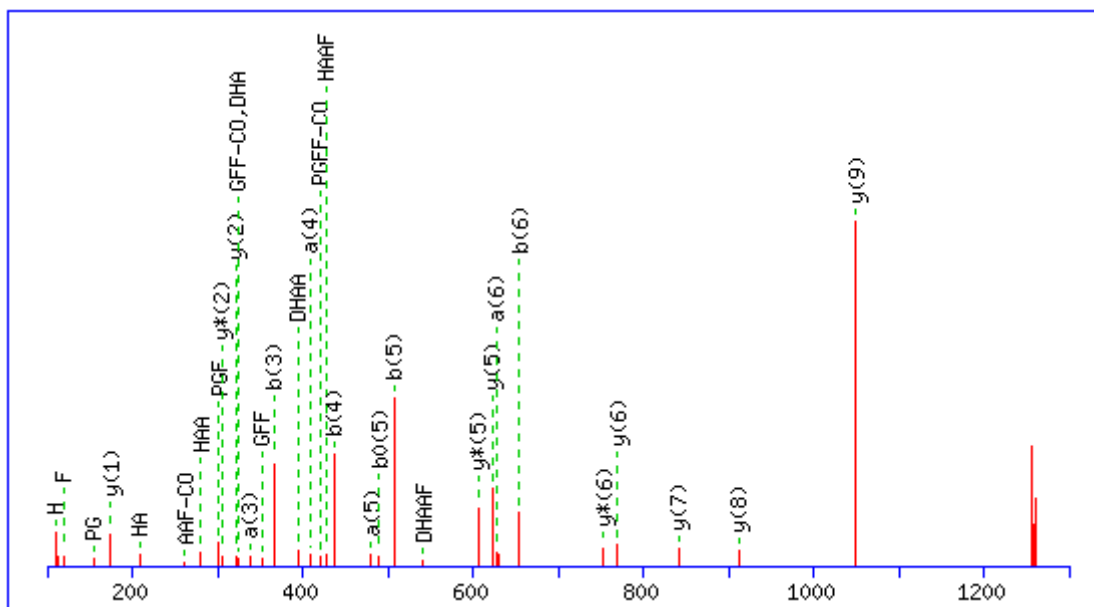

Monoisotopic mass of neutral peptide  $M_r(\text{calc})$ : 1276.6353

| #  | Immon.   | a         | a <sup>0</sup> | b         | b <sup>0</sup> | d        | Seq. | v         | w         | y         | y <sup>*</sup> | y <sup>0</sup> | #  |
|----|----------|-----------|----------------|-----------|----------------|----------|------|-----------|-----------|-----------|----------------|----------------|----|
| 1  | 86.0964  | 86.0964   |                | 114.0913  |                | 44.0495  | L    |           |           |           |                |                | 11 |
| 2  | 88.0393  | 201.1234  | 183.1128       | 229.1183  | 211.1077       | 157.1335 | D    | 1104.5374 | 1103.5421 | 1164.5585 | 1147.5320      | 1146.5479      | 10 |
| 3  | 110.0713 | 338.1823  | 320.1717       | 366.1772  | 348.1666       |          | H    | 967.4785  |           | 1049.5316 | 1032.5050      |                | 9  |
| 4  | 44.0495  | 409.2194  | 391.2088       | 437.2143  | 419.2037       |          | A    | 896.4414  |           | 912.4727  | 895.4461       |                | 8  |
| 5  | 44.0495  | 480.2565  | 462.2459       | 508.2514  | 490.2409       |          | A    | 825.4042  |           | 841.4355  | 824.4090       |                | 7  |
| 6  | 120.0808 | 627.3249  | 609.3144       | 655.3198  | 637.3093       |          | F    | 678.3358  |           | 770.3984  | 753.3719       |                | 6  |
| 7  | 70.0651  | 724.3777  | 706.3671       | 752.3726  | 734.3620       | 698.3620 | P    | 581.2831  | 580.2878  | 623.3300  | 606.3035       |                | 5  |
| 8  | 30.0338  | 781.3992  | 763.3886       | 809.3941  | 791.3835       |          | G    |           |           | 526.2772  | 509.2507       |                | 4  |
| 9  | 120.0808 | 928.4676  | 910.4570       | 956.4625  | 938.4519       |          | F    | 377.1932  |           | 469.2558  | 452.2292       |                | 3  |
| 10 | 120.0808 | 1075.5360 | 1057.5254      | 1103.5309 | 1085.5203      |          | F    | 230.1248  |           | 322.1874  | 305.1608       |                | 2  |
| 11 | 129.1135 |           |                |           |                |          | R    | 74.0237   | 73.0284   | 175.1190  | 158.0924       |                | 1  |



| Seq    | ya       | yb       | Seq    | ya       | yb       | Seq     | ya       | yb       |
|--------|----------|----------|--------|----------|----------|---------|----------|----------|
| DH     | 225.0982 | 253.0931 | DHA    | 296.1353 | 324.1302 | DHAA    | 367.1724 | 395.1674 |
| DHAAF  | 514.2409 | 542.2358 | DHAAFP | 611.2936 | 639.2885 | DHAAFPG | 668.3151 | 696.3100 |
| HA     | 181.1084 | 209.1033 | HAA    | 252.1455 | 280.1404 | HAAF    | 399.2139 | 427.2088 |
| HAAFP  | 496.2667 | 524.2616 | HAAFPG | 553.2881 | 581.2831 | AA      | 115.0866 | 143.0815 |
| AAF    | 262.1550 | 290.1499 | AAFP   | 359.2078 | 387.2027 | AAFPG   | 416.2292 | 444.2241 |
| AAFPGF | 563.2976 | 591.2926 | AF     | 191.1179 | 219.1128 | AFP     | 288.1707 | 316.1656 |
| AFPG   | 345.1921 | 373.1870 | AFPGF  | 492.2605 | 520.2554 | AFPGFF  | 639.3289 | 667.3239 |
| FP     | 217.1335 | 245.1285 | FPG    | 274.1550 | 302.1499 | FPGF    | 421.2234 | 449.2183 |
| FPGFF  | 568.2918 | 596.2867 | PG     | 127.0866 | 155.0815 | PGF     | 274.1550 | 302.1499 |
| PGFF   | 421.2234 | 449.2183 | GF     | 177.1022 | 205.0972 | GFF     | 324.1707 | 352.1656 |
| FF     | 267.1492 | 295.1441 |        |          |          |         |          |          |

Spot No.: **60**

Mascot score: **93**

Species: *Fusarium oxysporum f. sp. cubense race 4*

Protein name: **Chitinase 1**

NCBI accession No.: **gi| 475673339**

Sequence coverage %: **36**

Matched peptides No.: **16**

Total peptides No.: **66**

Calculated Mr: **47886**

Calculated pI: **6.31**

### Annotated PMF spectra:

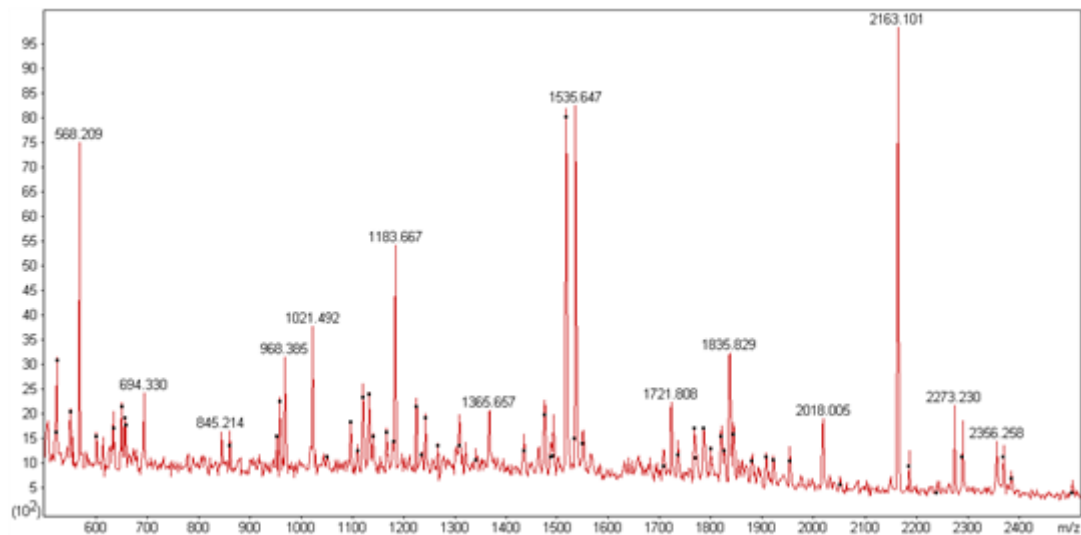

### Probability Based Mowse Score:

Protein score is  $-10 \cdot \log(P)$ , where P is the probability that the observed match is a random event. Protein scores greater than 75 are significant ( $p < 0.05$ ).

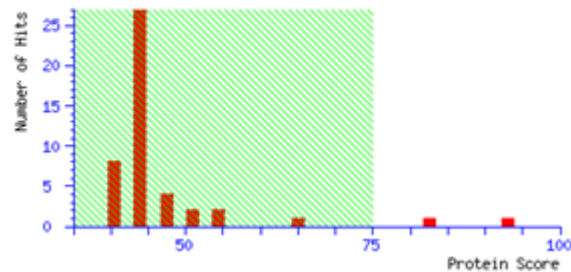

## Matched peptide sequences: shown in **Bold Red**

```

1 MRVSTLLGLS AYAVAEASCS RNIIYYDQWH TDDLPPKDVT HSVTHVMMSF
51 ANSSLFTEP SGKYEPFQPL KQVRALFDHD IKVCLAIGGW GDNAGFDAGL
101 KTDRSRERFA RNVASTLDRL GYDCVDIDME YPGGNGADYK QVVNSKKTYE
151 IQAFPLLKE IKKFIGSKEL SIAVPGLERD MIAVVPSETP LIEKSVDFVN
201 VMTYDLMNRR DSYTTHHVSV KGAARAIKDY LSLGFPAHKL GIPFYAKWFT
251 TKQGYKCTNP IGCPTELLEN PKDGSDTGKS GSMTFEAANF VSAPTNLTTT
301 PDATCGAGTF FKCATGGCCA ASGWCGDTAA HCGTGCQSAY GHCDGIDLSA
351 SFHEALDKGK TDKANGGQWY WDAPNRIFWS WDTPELIAEK ISLLAKTRGV
401 KSVMAWALAL DSHDWSHLKA MQQQFDRVNA

```

## Matched peptides information:

| Start - End | Observed  | Mr (expt) | Mr (calc) | ppm   | M | Peptide                                                       |
|-------------|-----------|-----------|-----------|-------|---|---------------------------------------------------------------|
| 22 - 37     | 2018.0049 | 2016.9976 | 2016.9581 | 19.6  | 0 | R.NIIYYDQWHTDDLPPK.D                                          |
| 64 - 71     | 1021.4915 | 1020.4842 | 1020.5280 | -42.9 | 0 | K.YEFPQPLK.Q                                                  |
| 75 - 82     | 958.4709  | 957.4637  | 957.4920  | -29.6 | 0 | R.ALFDHDIK.V                                                  |
| 83 - 101    | 1920.9716 | 1919.9643 | 1919.9200 | 23.1  | 0 | K.VCLAIGGMDNAGFDAGLK.T                                        |
| 102 - 106   | 634.2155  | 633.2082  | 633.3194  | -176  | 1 | K.TDRSR.E                                                     |
| 147 - 156   | 1224.6042 | 1223.5969 | 1223.6550 | -47.5 | 1 | K.KTYEIQAFPK.L                                                |
| 148 - 156   | 1096.5087 | 1095.5014 | 1095.5600 | -53.5 | 0 | K.TYEIQAFPK.L                                                 |
| 169 - 179   | 1183.6673 | 1182.6600 | 1182.6608 | -0.67 | 0 | K.ELSI <del>AV</del> PGLER.D                                  |
| 180 - 194   | 1721.8081 | 1720.8008 | 1720.8593 | -34.0 | 0 | R.DMI <del>AV</del> VPSETP <del>LIEK</del> .S + Oxidation (0) |
| 195 - 209   | 1819.8527 | 1818.8454 | 1818.8281 | 9.54  | 0 | K.SVDFVNVMTYDLMNR.R + Oxidation (0)                           |
| 195 - 209   | 1835.8294 | 1834.8221 | 1834.8230 | -0.47 | 0 | K.SVDFVNVMTYDLMNR.R + 2 Oxidation (0)                         |
| 230 - 239   | 1132.5596 | 1131.5523 | 1131.6077 | -48.9 | 0 | K.YLSLGFPAEK.L                                                |
| 257 - 272   | 1842.8576 | 1841.8503 | 1841.8652 | -8.05 | 0 | K.CTNPIGCPT <del>ELLEN</del> PK.D                             |
| 377 - 390   | 1734.8698 | 1733.8625 | 1733.8665 | -2.27 | 0 | R.IFWSN <del>DTPE</del> LIAEK.I                               |
| 420 - 427   | 952.4206  | 951.4133  | 951.4232  | -10.5 | 0 | K.AMQQQFDR.V                                                  |
| 420 - 427   | 968.3851  | 967.3778  | 967.4182  | -41.7 | 0 | K.AMQQQFDR.V + Oxidation (0)                                  |

Spot No.: **61**

Mascot score: **81**

Species: *Podospora anserina S mat+*

Protein name: **hypothetical protein**

NCBI accession No.: **gi| 171680085**

Sequence coverage %: **34**

Matched peptides No.: **10**

Total peptides No.: **42**

Calculated Mr: **41333**

Calculated pI: **5.61**

### Annotated PMF spectra:

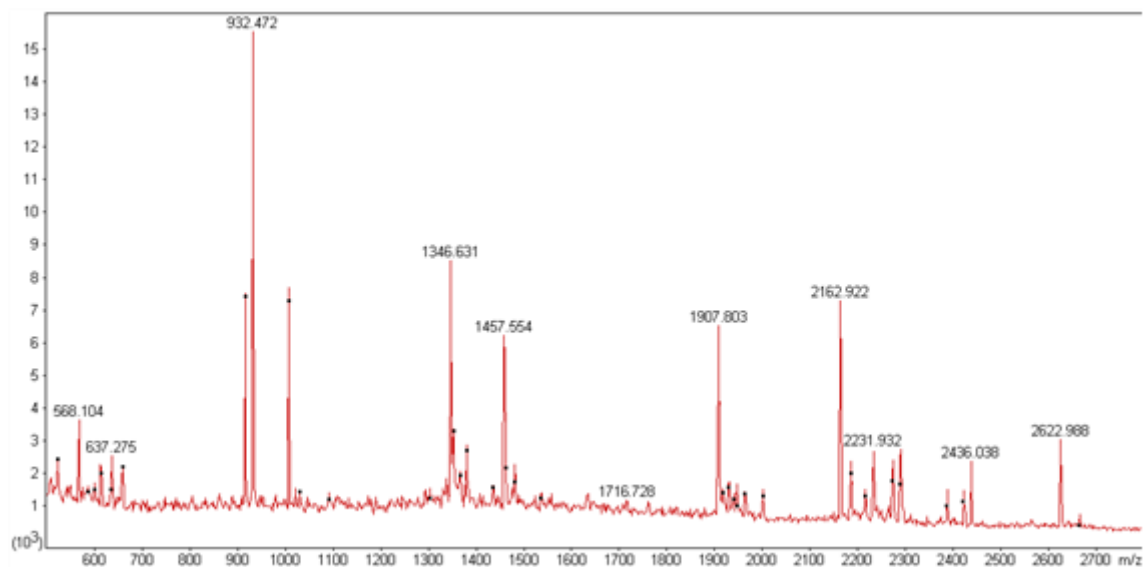

### Probability Based Mowse Score:

Protein score is  $-10 \cdot \log(P)$ , where  $P$  is the probability that the observed match is a random event. Protein scores greater than 75 are significant ( $p < 0.05$ ).

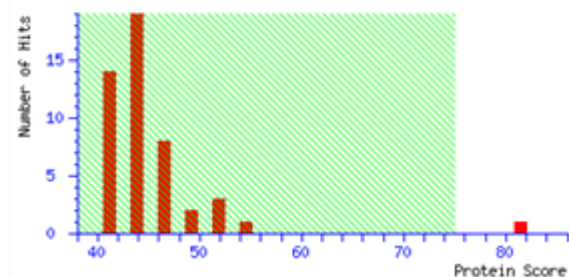

Matched peptide sequences: shown in **Bold Red**

```

1 TLALLDYYHI PFILLTNGGG KFEADRVAEL NEKLGSHMTT ENFCQSHTPF
51 QELLPVYRDK TILVTGSDYE KCREIMEGYG FRSVVTPGDI FRAAPEVFPP
101 DTVRGKVGRD LPKPIWRPRK EAGEHHQGSK GMVRDTEQEE REGKLEDHLK
151 VEAMFVLNDP RDWALDVQVF IDLLQSKQGY VGTYSEENNK GRWQGDGQPK
201 LFFSNSDLIW AAKYHLPRFG QGAFQHALVG IWNEVTEGKK ELVRTSFGKP
251 HRETYEYAE MLVRHRGGWL RAKGYKEGEI EGGLKRVYMV GDNPESDIAG
301 ANDYDGKGKY GTEWVSLIVE TGVFDATRMN FKDGDVRKAD VVKPNVAEAV
351 KWALRNEGWV DE

```

Matched peptides information:

| Start | End | Observed  | Mr(expt)  | Mr(calc)  | ppm   | M | Peptide                                |
|-------|-----|-----------|-----------|-----------|-------|---|----------------------------------------|
| 22    | 26  | 637.2748  | 636.2675  | 636.2867  | -30.2 | 0 | <b>KFEADR.V</b>                        |
| 72    | 82  | 1433.6489 | 1432.6416 | 1432.6227 | 13.2  | 1 | <b>KCREIMEGYGFR.S + Oxidation (0)</b>  |
| 83    | 92  | 1090.3906 | 1089.3913 | 1089.5819 | -175  | 0 | <b>R.SVVTPGDIFR.A</b>                  |
| 83    | 104 | 2420.0623 | 2419.0550 | 2419.2536 | -82.1 | 1 | <b>R.SVVTPGDI FRAAPEVFPFDIVR.G</b>     |
| 93    | 106 | 1533.6514 | 1532.6441 | 1532.7987 | -101  | 1 | <b>R.AAPEVFFFDIVRGR.V</b>              |
| 131   | 141 | 1365.5978 | 1364.5905 | 1364.5990 | -6.23 | 1 | <b>K.GMVRDTEQEER.E + Oxidation (0)</b> |
| 193   | 200 | 915.4566  | 914.4493  | 914.4246  | 27.0  | 0 | <b>R.WQGDGQPK.L</b>                    |
| 219   | 239 | 2287.9604 | 2286.9531 | 2287.1386 | -81.1 | 0 | <b>R.FQGAFQHALVGIWNEVTEGK.K</b>        |
| 286   | 307 | 2386.0714 | 2385.0641 | 2385.0543 | 4.12  | 1 | <b>K.RVYMGDNFESDIAGANDYDGK.G</b>       |
| 310   | 332 | 2662.9905 | 2661.9832 | 2662.3101 | -123  | 1 | <b>K.YTEWVSLIVETGVFDATRMNFK.D</b>      |

Spot No.: **62**

Mascot score: **83**

Species: *Fusarium oxysporum*

Protein name: **predicted GMC oxidoreductase**

NCBI accession No.: **gi| 283806340**      Sequence coverage %: **27**

Matched peptides No.: **9**      Total peptides No.: **24**

Calculated Mr: **71355**      Calculated pI: **5.20**

### Annotated PMF spectra:

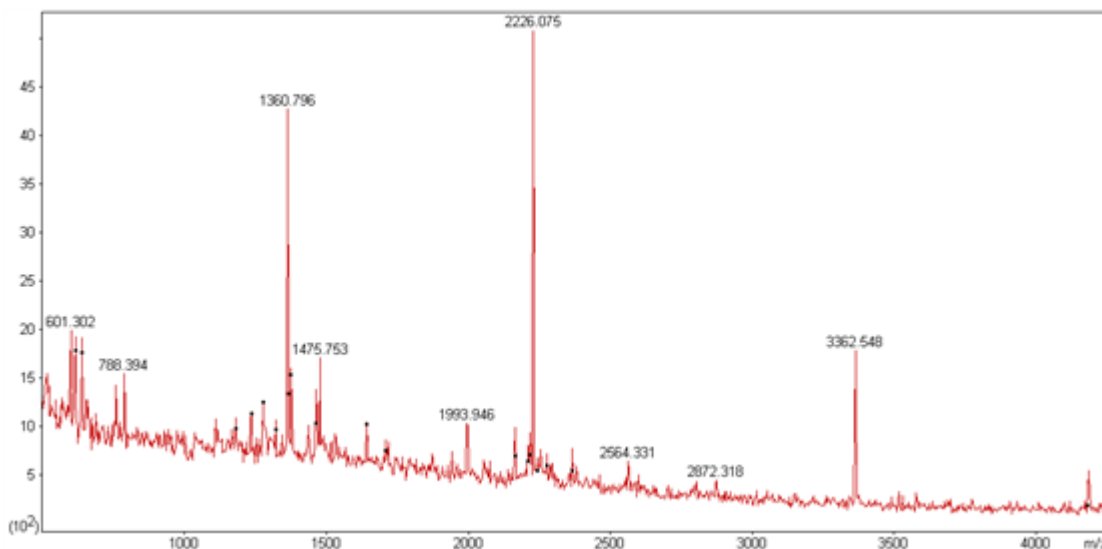

### Probability Based Mowse Score:

Protein score is  $-10 \cdot \log(P)$ , where P is the probability that the observed match is a random event. Protein scores greater than 75 are significant ( $p < 0.05$ ).

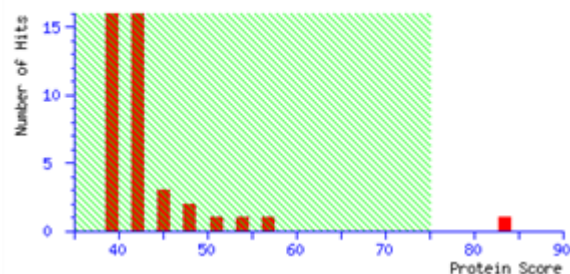

Matched peptide sequences: shown in **Bold Red**

```

1 MRCNVLSPSL LALSLSTSVT ARPEIPFIST LLDPLQHIVK SAYAGDGLKV
51 GHLGELGGIP GVDAEYDYVV VGGGTAGNTI GYRLAKAGYS VAIVEAGPFL
101 EISKPILOTS PGGVTAGSGA SLLDSNPLRD WRFTTTAQTG ADDREIHYAR
151 GMVLGGSSQL NFLVYHRPTN GTMAKWAEDV GDDSYTWEQM LPHFQKSPSF
201 TPPDNEKRNV TTDYDASAFS KEKGPLQISY ANYVPSWAVL VEKGLKSLGF
251 KGIDGFSSGS LLGYSYTTTT VQPKTATRSA SDDFVKTARS EKLKTLKVYT
301 ESLAKKVTFD DDKKATGVEV SSVGIDYTLK AKKEVIVSGG AFQSPQVLMV
351 SGVGPQKQHLE ELDIPVVADL PGVGQNLWDH VLFGPSFEVQ GLEDTLSAAI
401 NNDTVFQQAL DAYAQQQAGP LITNQVELLG WEKAPEKYRS KFSAETIKDL
451 ATFPDDWPEM EIIPLNVYSE DWSFPILQQP TDGKKYTSLN GALVAPLSRG
501 NITLRTNSTT DAPLINPNFL TKKADQEVAI ALFRRLREIA KSTPLKDTVL
551 KEVYPGEQHE TDEQILAVLR DTLMTVWHAA CTCKMGKKD EMAVLDSKAR
601 VYGVKGLRVV DASAFLLIP GHPVGTVYAL AEKIAHDIIT EKSEGSAYK
651 VDIDVEVS

```

Matched peptides information:

| Start - End | Observed  | Mr (expt) | Mr (calc) | ppm   | M | Peptide                                                                                                                                                    |
|-------------|-----------|-----------|-----------|-------|---|------------------------------------------------------------------------------------------------------------------------------------------------------------|
| 50 - 83     | 3362.5479 | 3361.5406 | 3361.6579 | -34.9 | 0 | K.VHGLGELGGIPGVDAEYDYVVVGGGTAGNTI <b>GYR</b> .L                                                                                                            |
| 87 - 129    | 4183.0748 | 4182.0675 | 4182.2212 | -36.8 | 0 | K.AGY <b>S</b> VAIVEAGP <b>FL</b> EIS <b>R</b> PI <b>L</b> AT <b>S</b> PG <b>V</b> T <b>A</b> GS <b>G</b> AS <b>L</b> LD <b>S</b> N <b>P</b> L <b>R</b> .D |
| 145 - 150   | 788.3944  | 787.3871  | 787.3977  | -13.4 | 0 | R. <b>E</b> I <b>H</b> Y <b>A</b> R. <b>G</b>                                                                                                              |
| 197 - 208   | 1374.6924 | 1373.6851 | 1373.6575 | 20.1  | 1 | K. <b>S</b> P <b>S</b> F <b>T</b> P <b>P</b> D <b>N</b> E <b>K</b> R.N                                                                                     |
| 315 - 330   | 1638.8490 | 1637.8417 | 1637.8512 | -5.80 | 0 | K. <b>A</b> T <b>G</b> V <b>E</b> V <b>S</b> S <b>V</b> G <b>I</b> D <b>Y</b> T <b>L</b> K. <b>A</b>                                                       |
| 523 - 534   | 1360.7964 | 1359.7891 | 1359.7510 | 28.0  | 1 | K. <b>K</b> A <b>D</b> Q <b>E</b> V <b>A</b> I <b>A</b> L <b>F</b> R. <b>R</b>                                                                             |
| 552 - 570   | 2226.0751 | 2225.0678 | 2225.0964 | -12.8 | 0 | K. <b>E</b> V <b>Y</b> P <b>O</b> E <b>Q</b> E <b>T</b> D <b>E</b> Q <b>I</b> L <b>A</b> V <b>L</b> R. <b>D</b>                                            |
| 589 - 600   | 1365.6718 | 1364.6645 | 1364.6242 | 29.6  | 1 | K.D <b>D</b> E <b>H</b> A <b>V</b> L <b>D</b> S <b>K</b> A <b>R</b> .V + Oxidation (H)                                                                     |
| 609 - 633   | 2564.3314 | 2563.3241 | 2563.4050 | -31.6 | 0 | R. <b>V</b> D <b>A</b> S <b>A</b> F <b>L</b> L <b>I</b> P <b>H</b> P <b>V</b> T <b>V</b> Y <b>A</b> L <b>A</b> E <b>K</b> .I                               |

Spot No.: **63**

Mascot score: **134**

Species: *Fusarium oxysporum f. sp. cubense race 4*

Protein name: **O-acetylhomoserine (thiol)-lyase**

NCBI accession No.: **gi| 475675629**      Sequence coverage %: **57**

Matched peptides No.: **15**      Total peptides No.: **35**

Calculated Mr: **47110**      Calculated pI: **5.89**

### Annotated PMF spectra:

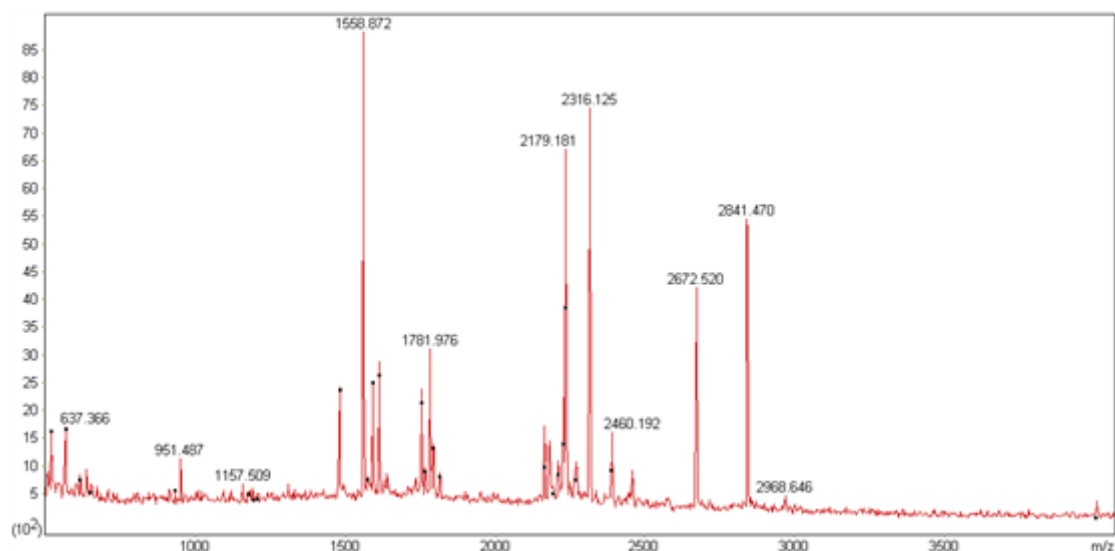

### Probability Based Mowse Score:

Protein score is  $-10 \cdot \log(P)$ , where P is the probability that the observed match is a random event. Protein scores greater than 75 are significant ( $p < 0.05$ ).

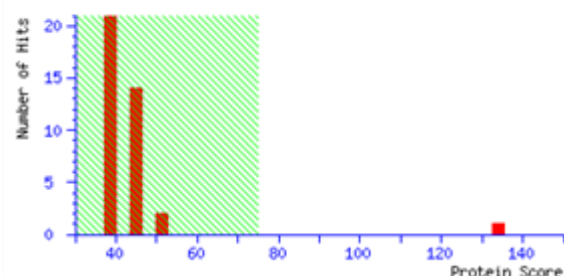



## Matched peptide sequences: shown in **Bold Red**

1 MAEQVFQNF **TLQLHAGYTP** **DPHTRSTAVP** **IYATSSYTFN** **DSAHGARLFG**  
 51 **LKELGNIYSR** LMNPTVDVFE KRIAALGGI AAAATSSGQA AQFLTIATLA  
 101 **KAGDNIVASS** **HLYGGTYNQL** **NVLLPRFGIK** **TKFVRSKLE** **DYAAAIDDQT**  
 151 **RAIYVESMSN** **PDYVVPDFEG** **IAKIAHEHGI** **PLVVDNTLGA** **GGYYVRPIEH**  
 201 **GADIVVHSAT** **KWIGGHGTTI** **GGVIVDSGRF** **NWNKHSRFP** **EMVEPSPSYH**  
 251 **GLKYWEAFGP** **ATFITRIRVE** **MLRDIGACLS** **PFSAQQLLG** **IETLGLRAER**  
 301 **HAQNTKLA** **YFESSPNVSW** **VLWPGSESH** **TYAQAKKYL** **RGFGAMLSIG**  
 351 **VKGDASAGSK** **VVDGLKLVSN** **LANVGDAKSL** **AIHPWSTTHE** **QLSEDERLAS**  
 401 **GVTEDMIRIS** **VGIEHVDDII** **ADFEQSFQKA** YGS

## Matched peptides information:

| Start - End | Observed  | Mr (expt) | Mr (calc) | ppm   | M | Peptide                                    |
|-------------|-----------|-----------|-----------|-------|---|--------------------------------------------|
| 26 - 47     | 2316.1253 | 2315.1180 | 2315.0818 | 15.6  | 0 | R.STAVPIYATSSYTFNDSAHGAR.L                 |
| 53 - 60     | 951.4869  | 950.4796  | 950.4821  | -2.62 | 0 | K.ELGNIYSR.L                               |
| 102 - 126   | 2672.5203 | 2671.5130 | 2671.3718 | 52.9  | 0 | K.AGDNIVASSHLYGGTYNQLNVLLPR.F              |
| 139 - 151   | 1480.7845 | 1479.7772 | 1479.6841 | 62.9  | 0 | K.LEDYAAAIDDQTR.A                          |
| 152 - 173   | 2460.1916 | 2459.1843 | 2459.1566 | 11.3  | 0 | R.AIYVESMSNPDYVVPDFEGIAK.I + Oxidation (0) |
| 174 - 211   | 4005.9917 | 4004.9844 | 4005.0861 | -25.4 | 0 | K.IAHEHGIPLVVDNTLGAQGYVVRPIEHGADIVVHSATK.W |
| 212 - 229   | 1781.9760 | 1780.9687 | 1780.9221 | 26.2  | 0 | K.WIGGHGTTIGGVIVDSGR.F                     |
| 235 - 253   | 2213.0963 | 2212.0890 | 2212.0371 | 23.5  | 1 | K.HSDRFFEMVEPSPSYHGLK.Y                    |
| 235 - 253   | 2229.0015 | 2227.9942 | 2228.0320 | -17.0 | 1 | K.HSDRFFEMVEPSPSYHGLK.Y + Oxidation (0)    |
| 254 - 266   | 1558.8718 | 1557.8645 | 1557.7616 | 66.1  | 0 | K.YWEAFGPATFITR.I                          |
| 342 - 360   | 1752.8887 | 1751.8814 | 1751.8876 | -3.54 | 1 | R.GFGAMLSIGVKGDAKSLV                       |
| 379 - 397   | 2236.1104 | 2235.1031 | 2235.0556 | 21.3  | 0 | K.SLAHPWSTTHEQLSEDER.L                     |
| 398 - 408   | 1191.5454 | 1190.5381 | 1190.5965 | -49.0 | 0 | R.LASGVTEDMIR.I                            |
| 398 - 408   | 1207.6235 | 1206.6162 | 1206.5914 | 20.5  | 0 | R.LASGVTEDMIR.I + Oxidation (0)            |
| 409 - 429   | 2390.2758 | 2389.2685 | 2389.1802 | 37.0  | 0 | R.ISVGIEHVDDIADFEQSFQKA                    |

Spot No.: **64**

Mascot score: **75**

Species: *Fusarium oxysporum*

Protein name: **lactonohydrolase**

NCBI accession No.: **gi| 3810873**      Sequence coverage %: **31**

Matched peptides No.: **11**      Total peptides No.: **58**

Calculated Mr: **43237**      Calculated pI: **5.10**

### Annotated PMF spectra:

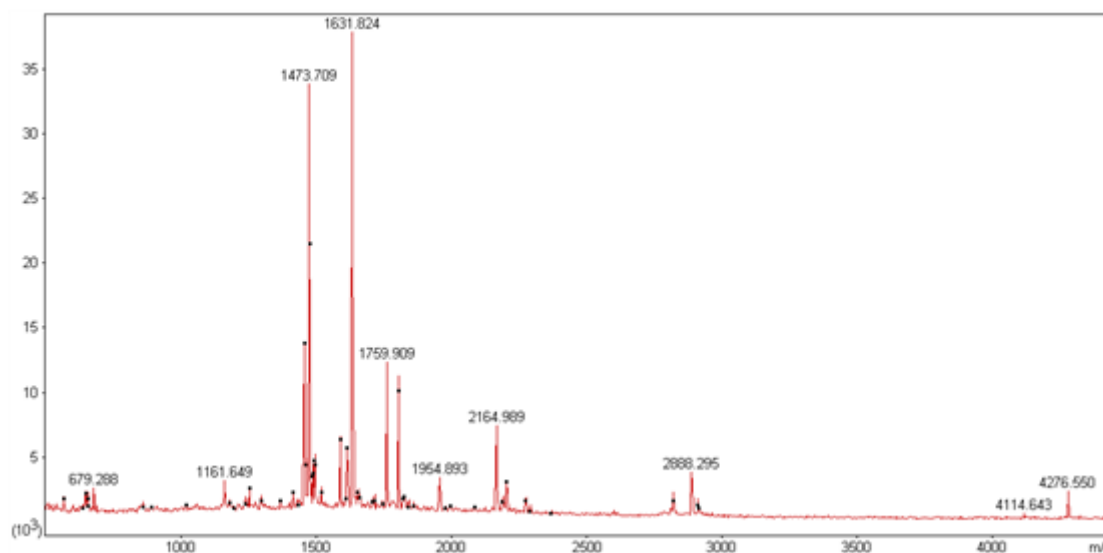

### Probability Based Mowse Score:

Protein score is  $-10 \cdot \log(P)$ , where P is the probability that the observed match is a random event. Protein scores greater than 75 are significant ( $p < 0.05$ ).

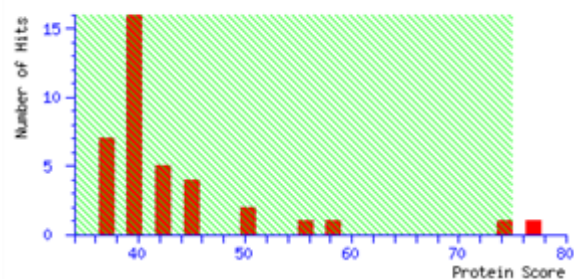

Matched peptide sequences: shown in **Bold Red**

```

1  MPSSISVLAG VLVFVLGAVA AKLPSTAQII DQKSFNVLKD VPPPAVANDS
51  LVFTWPGVTE ESLVEKPFHV YDEEFYDVIG KDPSLTLIAT SDTDPIFHEA
101 VVWYPPTEEV FFVQNAGAPA AGTGLNKSSI IQKISLKEAD AVRKGKQDEV
151 KVTVVDSNPQ VINPNGGTYI KGNIIFAGEG QGDDVPSALY LMNPLPPYNT
201 TILLNNYFGR QFNSLNDVGI NPRNGDLYFT DTLYGYLQDF RPVPGLRNQV
251 YRYNFDTGAV TVVADDFILP NGIGFGPDGK KVYVTDTGIA LGFYGRNLSS
301 PASVYSFDVN QDGTLQNRKT FAYVASFIPD GVHTDSKGRV YAGCGDGVHV
351 WNPSGKLIK IYTGTVAAANF QFAGKGRMII TGQTKLFYVT LGASGPKLYD

```

Matched peptides information:

| Start | End | Observed  | Mr (expt) | Mr (calc) | ppm   | M | Peptide                  |
|-------|-----|-----------|-----------|-----------|-------|---|--------------------------|
| 152   | 171 | 2164.9885 | 2163.9812 | 2164.0801 | -45.7 | 0 | K.VTVVDSNPQVINPHOOTYYK.G |
| 211   | 223 | 1473.7092 | 1472.7019 | 1472.7372 | -23.9 | 0 | R.QFNSLNDVGINFR.N        |
| 248   | 252 | 679.2879  | 678.2806  | 678.3449  | -94.8 | 0 | R.NQVYR.Y                |
| 281   | 296 | 1759.9087 | 1758.9014 | 1758.9305 | -16.5 | 1 | K.KVYVTDTGIALGFYOR.N     |
| 282   | 296 | 1631.8239 | 1630.8166 | 1630.8355 | -11.6 | 0 | K.VVYVTDTGIALGFYOR.N     |
| 319   | 337 | 2082.9745 | 2081.9672 | 2082.0422 | -36.0 | 1 | R.KTFAYVASFIPDGVHTDSK.G  |
| 320   | 337 | 1954.8934 | 1953.8861 | 1953.9473 | -31.3 | 0 | K.TFAYVASFIPDGVHTDSK.G   |
| 340   | 356 | 1802.7742 | 1801.7669 | 1801.8206 | -29.8 | 0 | R.VYAGCGDGVVWNPSGK.L     |
| 361   | 375 | 1587.7483 | 1586.7410 | 1586.8093 | -43.0 | 0 | K.IYTGTVAAANFQFAGK.G     |
| 378   | 385 | 891.4544  | 890.4471  | 890.4895  | -47.6 | 0 | R.MIITQTK.L              |
| 386   | 397 | 1252.5909 | 1251.5836 | 1251.6863 | -82.1 | 0 | K.LFYVTLGASGPK.L         |

Spot No.: **65**

Mascot score: **126**

Species: *Fusarium oxysporum f. sp. cubense race 4*

Protein name: **Catalase-peroxidase**

NCBI accession No.: **gi| 475671755**

Sequence coverage %: **39**

Matched peptides No.: **15**

Total peptides No.: **51**

Calculated Mr: **73292**

Calculated pI: **5.98**

### Annotated PMF spectra:

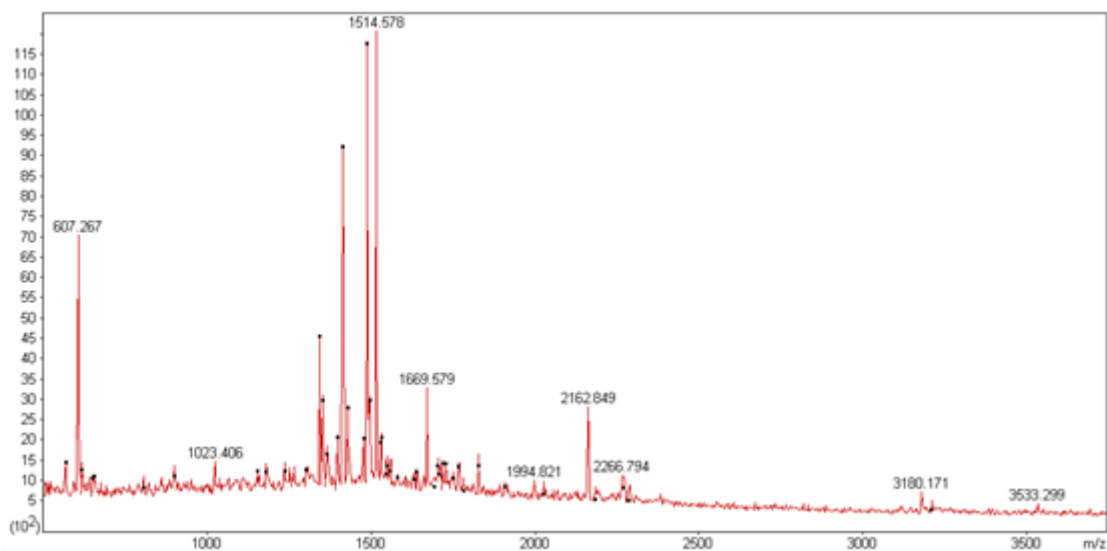

### Probability Based Mowse Score:

Protein score is  $-10 \cdot \log(P)$ , where P is the probability that the observed match is a random event. Protein scores greater than 75 are significant ( $p < 0.05$ ).

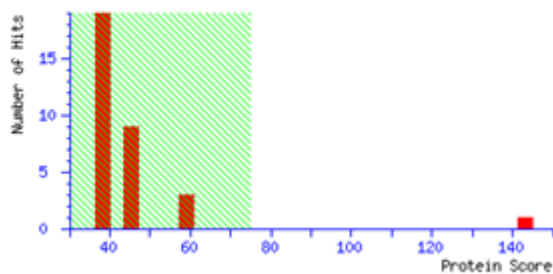

Matched peptide sequences: shown in **Bold Red**

1 MSWHA<sup>V</sup>GT<sup>R</sup>YR **IFDGRGGGRQ** **GQQR**FAPLNS WPDN<sup>V</sup>SLDKA RLLW<sup>P</sup>VKQK  
 51 YGNK<sup>V</sup>SWADL IVMAG<sup>N</sup>VALE DMGF<sup>K</sup>TIGFA AGR<sup>P</sup>DTWEAD **EATYYGGEDT**  
 101 **WLGNDVRYSD** **GHPGTTKPGA** **TDSDQAPHKN** IHTRELEKPL AAAHHGLIYV  
 151 NPEGP<sup>D</sup>GNPD PVAAARDIRE TFGR<sup>M</sup>AMNDE ETVALIAGGH TVGK**THGAGS**  
 201 **TDHVGPEPEA** **ADLAQQGLGW** **SNSYKTGKGP** HTTTSGLEVT WTSTP<sup>V</sup>KWSH  
 251 DY<sup>L</sup>KYLFQFE WELTK<sup>S</sup>PAGA **HQWVAKDANA** TVPDA<sup>F</sup>DPNK KQKPTMLTTD  
 301 LSLRF<sup>D</sup>PEYE KISR<sup>R</sup>FLENP **DQFNEAFAKA** WFKLTHRDMG PRDRYL<sup>G</sup>P  
 351 **PKEVFLWQDP** **VPERDYKLVD** DGDISA<sup>I</sup>KNE ILKSGVDVSK **LVSTAWASAS**  
 401 **TFRGS**DLRGG ANGAR<sup>I</sup>RLQP **QKDWEVNNPA** **QLSKVLSTLE** GIQK<sup>K</sup>FNDSQ  
 451 **SSGKAISLAD** **VIVLAGSAAV** **EKAAKDAGVN** ITV<sup>P</sup>PFAPGRT **DATQEQT**DVK  
 501 **SVNHLQPFAD** **GFRNYGS**TD RVKLE<sup>H</sup>QLID **RAQLL**TLSVP ELTALIGGLR  
 551 ALNTNYDGSS HGIF<sup>T</sup>NRPGV LTNDF<sup>F</sup>VNLL DMSTEWKAVG NGDIFEGTDR  
 601 KTGAK<sup>K</sup>WTGT **RVDLVF**SHA **ELRATA**EYA EAGG<sup>Q</sup>EKLVK DFVAAWTKVM  
 651 NLDRFDLANG SSPKAS<sup>P</sup>RL

Matched peptides information:

| Start | End | Observed  | Mr(expt)  | Mr(calc)  | ppm   | M | Peptide                                                                                  |
|-------|-----|-----------|-----------|-----------|-------|---|------------------------------------------------------------------------------------------|
| 11    | 15  | 607.2666  | 606.2593  | 606.3126  | -87.8 | 0 | R.IFDGR.G                                                                                |
| 20    | 24  | 616.2804  | 615.2731  | 615.3089  | -58.1 | 0 | R.QQQR.F                                                                                 |
| 25    | 39  | 1702.6239 | 1701.6166 | 1701.8362 | -129  | 0 | R.FAPLNSWPDNVS.LDK.A                                                                     |
| 76    | 107 | 3533.2993 | 3532.2920 | 3532.5808 | -81.7 | 0 | K.TIGFAAGR <sup>P</sup> DTWEADEATYYGGEDT <sup>W</sup> LGN <sup>D</sup> V <sup>R</sup> .Y |
| 108   | 129 | 2266.7940 | 2265.7867 | 2266.0251 | -105  | 0 | R.YSDGHP <sup>T</sup> TKPGAT <sup>D</sup> SDQAP <sup>H</sup> K.H                         |
| 195   | 225 | 3180.1714 | 3179.1641 | 3179.4544 | -91.3 | 0 | K.THGAG <sup>S</sup> TDHVGPEPEA <sup>A</sup> DLAQQGL <sup>W</sup> NS <sup>S</sup> YK.T   |
| 266   | 276 | 1151.3901 | 1150.3828 | 1150.5883 | -179  | 0 | K.SPAGAB <sup>Q</sup> NVAK.D                                                             |
| 315   | 329 | 1825.6899 | 1824.6826 | 1824.8795 | -108  | 1 | R.RFLEN <sup>P</sup> DQFNEAFAK.A                                                         |
| 316   | 329 | 1669.5787 | 1668.5714 | 1668.7784 | -124  | 0 | R.FLEN <sup>F</sup> DQFNEAFAK.A                                                          |
| 353   | 364 | 1514.5778 | 1513.5705 | 1513.7565 | -123  | 0 | K.EVFLW <sup>Q</sup> DP <sup>V</sup> PER.D                                               |
| 391   | 403 | 1396.5324 | 1395.5251 | 1395.7147 | -136  | 0 | K.LVSTAMASASTFR.G                                                                        |
| 418   | 434 | 1994.8207 | 1993.8134 | 1994.0221 | -105  | 1 | R.LQPQK <sup>D</sup> WEVNNPA <sup>Q</sup> LSK.V                                          |
| 455   | 472 | 1726.7163 | 1725.7090 | 1725.9876 | -161  | 0 | K.AISLAD <sup>V</sup> I <sup>V</sup> LAGSAAVEK.A                                         |
| 476   | 489 | 1413.5334 | 1412.5261 | 1412.7412 | -152  | 0 | K.DAGV <sup>H</sup> ITV <sup>P</sup> PFAPGR.T                                            |
| 490   | 500 | 1235.4230 | 1234.4157 | 1234.5677 | -123  | 0 | R.TDATQEQT <sup>D</sup> VK.S                                                             |
| 501   | 513 | 1487.5296 | 1486.5223 | 1486.7317 | -141  | 0 | K.SVNHLQ <sup>P</sup> FAD <sup>G</sup> FR.H                                              |
| 514   | 521 | 899.2688  | 898.2615  | 898.3781  | -130  | 0 | R.NYGS <sup>S</sup> TDR.V                                                                |
| 524   | 531 | 1023.4065 | 1022.3992 | 1022.5509 | -148  | 0 | K.LEH <sup>Q</sup> LIDR.A                                                                |
| 612   | 623 | 1342.5117 | 1341.5044 | 1341.7041 | -149  | 0 | R.VDLV <sup>F</sup> OSHA <sup>E</sup> LR.A                                               |

Spot No.: **66**

Mascot score: **119**

Species: *Fusarium oxysporum Fo5176*

Protein name: **DEAD/DEAH box helicase**

NCBI accession No.: **gi| 342890194**      Sequence coverage %: **55**

Matched peptides No.: **21**      Total peptides No.: **68**

Calculated Mr: **44984**      Calculated pI: **4.98**

### Annotated PMF spectra:

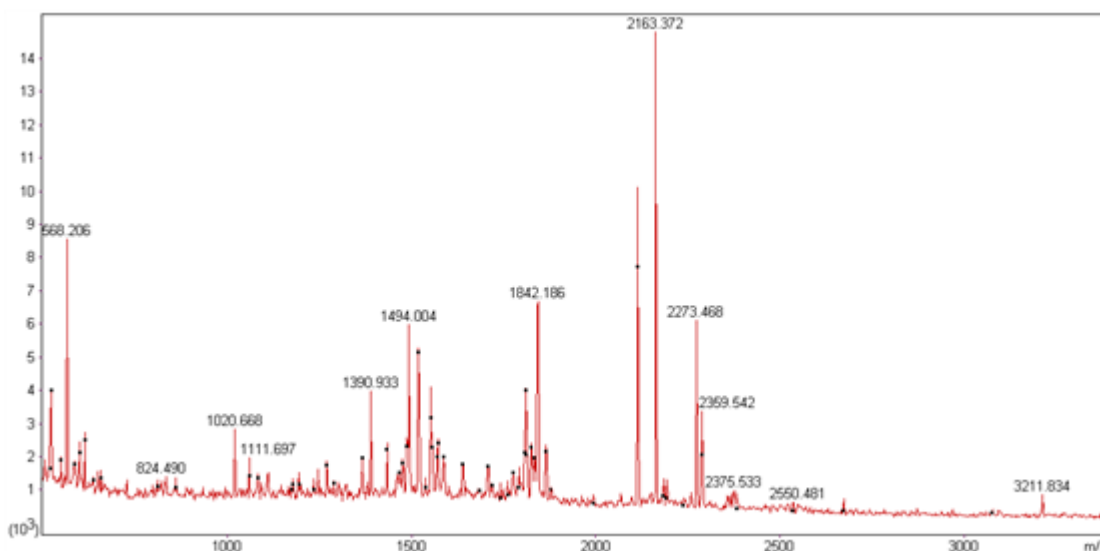

### Probability Based Mowse Score:

Protein score is  $-10 \cdot \log(P)$ , where P is the probability that the observed match is a random event. Protein scores greater than 75 are significant ( $p < 0.05$ ).

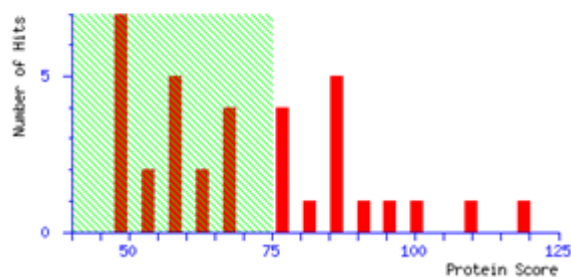

## Matched peptide sequences: shown in **Bold Red**

1 **MADKGL****EDVP** **EGQIESNYDE** **TVDSFD****DMNL** **KSELLR****GVYA** **YGFERPSAIQ**  
 51 **QR****AIMPVIK****G** **HDVIAQAQSG** **IGKTAT****F****SIS** **VLQKID****TNVK** **QCQALILAPT**  
 101 **RELAQQI****QKV** **VVAIGDFMQI** **ECHACIGGTS** **VREDMKALQD** **GPQVVVGT****PG**  
 151 **RVQDMI****QRRF** **LKTDSMKMFV** **LDEADEMLSR** **GFTEQIYDIF** **QLLPQSTQVV**  
 201 **LLSATMPQDV** **LEVTTKFM****RD** **PVRILVKKDE** **LTLEGIKQFY** **I****AVEKEE****EWKL**  
 251 **DTLSDLYETV** **TITQAVIFCN** **TRRKVDWLTD** **KLTARDFTVS** **AMHGDM****DQAQ**  
 301 **RDLIMKEFRS** **GSSRVLIATD** **LLARGIDVQQ** **VSLVIN****YDLP** **ANRENYI****HRI**  
 351 **GRGGRFGRKG** **VAINFVTAED** **VRMMREIEQF** **YSTQIEEMPM** **NVADLI**

## Matched peptides information:

| Start - End | Observed  | Mr(expt)  | Mr(calc)  | ppm  | M | Peptide                                                                   |
|-------------|-----------|-----------|-----------|------|---|---------------------------------------------------------------------------|
| 5 - 31      | 3075.6342 | 3074.6269 | 3074.3186 | 100  | 0 | K.GLE <b>DP</b> PEQ <b>IESNYDE</b> TVDSFD <b>DMNL</b> K.S + Oxidation (0) |
| 37 - 52     | 1842.1860 | 1841.1787 | 1840.9220 | 139  | 0 | R.GVYAY <b>GFERPSAI</b> QQR.A                                             |
| 74 - 84     | 1194.7873 | 1193.7800 | 1193.6656 | 95.9 | 0 | K.TATFSIS <b>VLQK</b> .I                                                  |
| 74 - 90     | 1865.1717 | 1864.1644 | 1864.0306 | 71.8 | 1 | K.TATFSIS <b>VLQKID</b> TNVK.Q                                            |
| 91 - 101    | 1270.8607 | 1269.8534 | 1269.6863 | 132  | 0 | K.QCQAL <b>ILAP</b> TR.E                                                  |
| 110 - 132   | 2535.5519 | 2534.5446 | 2534.2080 | 133  | 0 | K.VVAIGDF <b>MQIE</b> CHACIGGTSVR.E + Oxidation (0)                       |
| 133 - 136   | 522.2575  | 521.2502  | 521.2155  | 66.5 | 0 | R.ED <b>SK</b> .A                                                         |
| 137 - 151   | 1494.0043 | 1492.9970 | 1492.7998 | 132  | 0 | K.ALQD <b>GPQVVVGT</b> PGR.V                                              |
| 152 - 159   | 1061.6510 | 1060.6437 | 1060.5448 | 93.3 | 1 | R.VQ <b>DMI</b> QRR.F + Oxidation (0)                                     |
| 168 - 180   | 1556.0257 | 1555.0184 | 1554.7058 | 201  | 0 | K.MFV <b>LDEADE</b> MLSR.G                                                |
| 168 - 180   | 1571.9530 | 1570.9457 | 1570.7007 | 156  | 0 | K.MFV <b>LDEADE</b> MLSR.G + Oxidation (0)                                |
| 168 - 180   | 1587.9343 | 1586.9270 | 1586.6956 | 146  | 0 | K.MFV <b>LDEADE</b> MLSR.G + 2 Oxidation (0)                              |
| 238 - 249   | 1570.0028 | 1568.9955 | 1568.7875 | 133  | 1 | K.QFY <b>I</b> AVE <b>KEE</b> WK.L                                        |
| 250 - 272   | 2673.7022 | 2672.6949 | 2672.3367 | 134  | 0 | K.LDTLSDLYET <b>VTITQAVI</b> PCNTR.R                                      |
| 315 - 324   | 1084.7952 | 1083.7879 | 1083.6652 | 113  | 0 | R.VLIATD <b>LLAR</b> .G                                                   |
| 325 - 343   | 2114.4375 | 2113.4302 | 2113.1168 | 148  | 0 | R.GIDV <b>QQVSLVIN</b> YDLPANR.E                                          |
| 350 - 355   | 615.3811  | 614.3738  | 614.3612  | 20.5 | 1 | R.IG <b>ROGR</b> .F                                                       |
| 359 - 372   | 1519.0417 | 1518.0344 | 1517.8202 | 141  | 1 | R.KV <b>VAINFV</b> TAEDVR.M                                               |
| 360 - 372   | 1390.9326 | 1389.9253 | 1389.7252 | 144  | 0 | K.G <b>VAINFV</b> TAEDVR.M                                                |
| 360 - 375   | 1809.1141 | 1808.1068 | 1807.9073 | 110  | 1 | K.G <b>VAINFV</b> TAEDVR <b>MR</b> .E                                     |
| 360 - 375   | 1825.0638 | 1824.0565 | 1823.9022 | 84.6 | 1 | K.G <b>VAINFV</b> TAEDVR <b>MR</b> .E + Oxidation (0)                     |

Spot No.: 67

Mascot score: 80

Species: *Candida parapsilosis*

Protein name: hypothetical protein CPAR2\_601850

NCBI accession No.: gi| 354543047      Sequence coverage %: 38

Matched peptides No.: 9      Total peptides No.: 80

Calculated Mr: 23020      Calculated pI: 10.12

### Annotated PMF spectra:

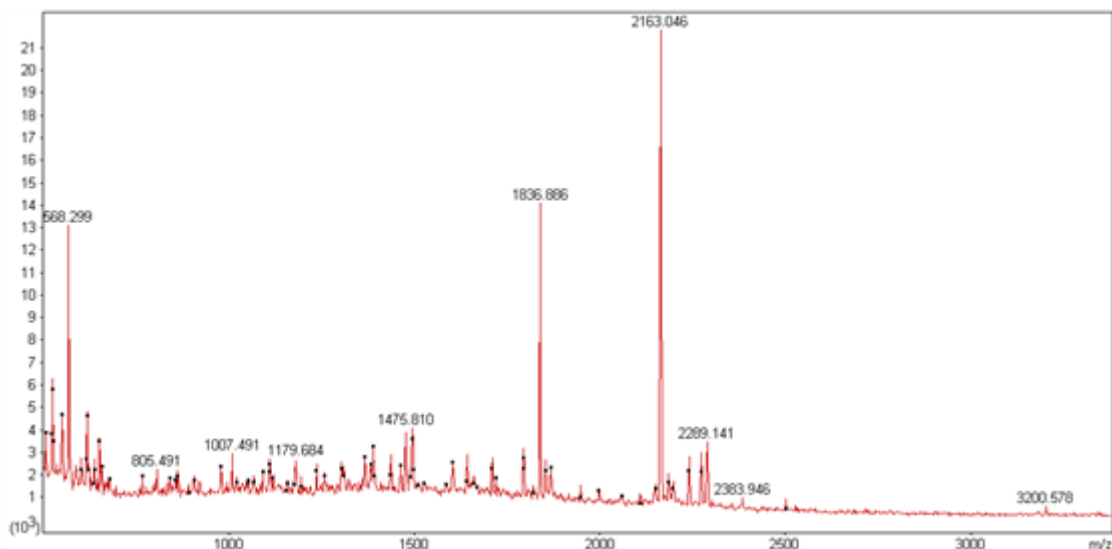

### Probability Based Mowse Score:

Protein score is  $-10 \cdot \log(P)$ , where P is the probability that the observed match is a random event. Protein scores greater than 75 are significant ( $p < 0.05$ ).

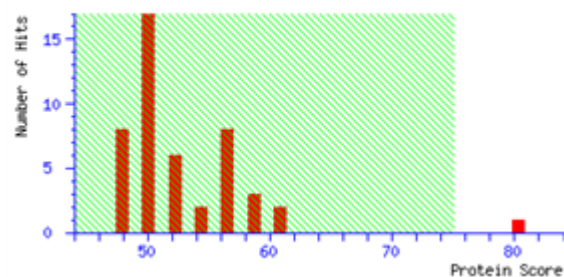



Matched peptide sequences: shown in **Bold Red**

**1 MSSTPSPTKR** **SALSPKVFNV** **NQLSPQRKNL** **GLSRRHTNKS** **PIRSSTEVRT**  
**51 PSPK**KPKPAT**** **TLGFTIWEDN** **VDTRSHEIVG** **TPTSNELNHN** **DQENILQPKS**  
**101 TYRRRVHGSP** **LRDLSINSFK** **GYITSNGVIT** **QLEELYQPIN** **FENEFKSAHR**  
**151 FNGLPFVTP** **TKKDKYLVKS** **GQCADGSVGR** **HSRSFSAGIN** **EAKRDLVQKP**  
**201 RFAISS**

Matched peptides information:

| Start - End | Observed  | Mr(expt)  | Mr(calc)  | ppm   | M | Peptide                        |
|-------------|-----------|-----------|-----------|-------|---|--------------------------------|
| 1 - 10      | 1107.5959 | 1106.5886 | 1106.5390 | 44.8  | 1 | -.MSSTPSPTKR.S + Oxidation (0) |
| 17 - 27     | 1301.6968 | 1300.6895 | 1300.6888 | 0.57  | 0 | K.VFNVNQLSPQR.K                |
| 29 - 34     | 659.4844  | 658.4772  | 658.3762  | 153   | 0 | K.NLQLSR.R                     |
| 55 - 74     | 2289.1414 | 2288.1341 | 2288.1801 | -20.1 | 0 | K.KPRKATTLGFTIMEDNVDTR.S       |
| 164 - 169   | 765.4716  | 764.4643  | 764.4432  | 27.6  | 1 | K.DRYLVK.S                     |
| 166 - 169   | 522.3586  | 521.3513  | 521.3213  | 57.6  | 0 | K.YLVK.S                       |
| 170 - 180   | 1065.6342 | 1064.6269 | 1064.4557 | 161   | 0 | K.SQCADGSVGR.H                 |
| 184 - 194   | 1179.6836 | 1178.6763 | 1178.6044 | 61.1  | 1 | R.SFSAGINEAQR.D                |
| 202 - 206   | 524.3430  | 523.3358  | 523.2642  | 137   | 0 | R.FAISS.-                      |

Spot No.: **68**

Mascot score: **144**

Species: *Fusarium oxysporum f. sp. cubense race 4*

Protein name: **1,3-beta-glucanosyltransferase gel4**

NCBI accession No.: **gi| 475668458**      Sequence coverage %: **52**

Matched peptides No.: **26**      Total peptides No.: **86**

Calculated Mr: **59159**      Calculated pI: **4.83**

### Annotated PMF spectra:

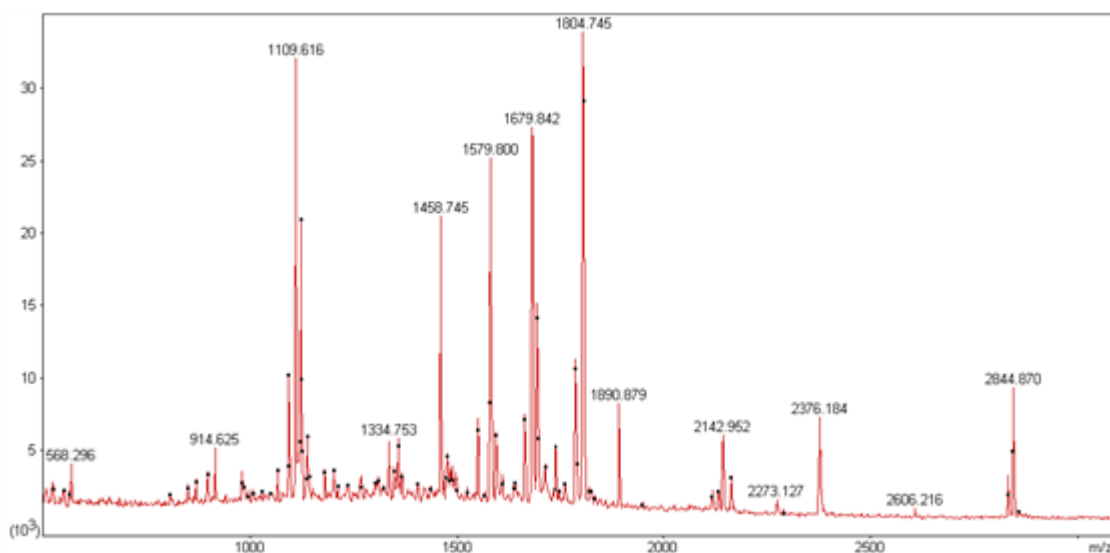

### Probability Based Mowse Score:

Protein score is  $-10 \cdot \log(P)$ , where P is the probability that the observed match is a random event. Protein scores greater than 75 are significant ( $p < 0.05$ ).

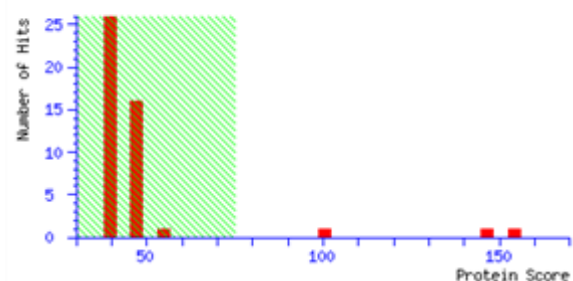

## Matched peptide sequences: shown in **Bold Red**

1 MKFSAAIVAA AATAASAK**LE** PITMKGSK**LF** YSNGTQFF**MK** GVAYQQDTAA  
 51 AG**ETNDKTTK** YIDPLADEDA CKRDIPL**LKQ** LGTNIIRTYA INPKADHKAC  
 101 MKLLDDAG**IY** VISDLSEPSV SINRDPK**WD** VELYERYIGV VDELGQYDNV  
 151 VGFFAGNEVS NNVSNTQASA FVKA~~AVR~~DTK KHIKSKFSRW LGVGYAS**NDD**  
 201 VDIREQ**IADY** F**NC**GDDDSRI D**Y**WGYNIYSW CGKSSMQDSG YADQAKFFEN  
 251 Y**SV**PVFF**AEY** GCNEPDGAAG RIFDETT**ALY** EEK**V**MTDVFS GGIVYMYFQ**E**  
 301 ANDYGLVKIS KNGDAVK**QKD** FA**QL**QKKANA AKPSGVEEDS YKPTG**K**AAIC  
 351 PEQSKNWRAN SVLPPVPDSD LCD**CM**VKSRS CVPADNLKAK DFNDIFGYIC  
 401 G**QDKK**ICTAI NANATAGIYG AYSMCSNEAK LAYILD**AYT** S**QK**SAADACD  
 451 F**KG**KATTQKA ESQDSCKSAL ASASKINEEV ATATHAVASS STGGSNS**SSE**  
 501 DDENFGLQAA SIARV**FL**GD FAVGAYMAVA GVVGAGM**VLL**

## Matched peptides information:

| Start | End | Observed  | Ms (expt) | Ms (calc) | ppm   | M | Peptide                                |
|-------|-----|-----------|-----------|-----------|-------|---|----------------------------------------|
| 19    | 28  | 1119.6308 | 1118.6235 | 1118.6005 | 20.6  | 1 | K.LKPTTHKSK.L + Oxidation (S)          |
| 29    | 40  | 1498.7480 | 1497.7407 | 1497.6962 | 29.7  | 0 | K.LFVSNQTQFFMK.G + Oxidation (S)       |
| 41    | 87  | 1738.7833 | 1737.7460 | 1737.7806 | -19.9 | 0 | K.GVAYQQDTAAAGETNDE.T                  |
| 74    | 87  | 1593.7867 | 1592.7794 | 1592.9613 | -114  | 1 | R.DIPLAKQLQTKIR.T                      |
| 80    | 87  | 914.6248  | 913.6174  | 913.5345  | 90.7  | 0 | K.QVQTHIR.T                            |
| 88    | 94  | 806.5183  | 805.5110  | 805.4334  | 86.4  | 0 | R.TYVIRK.A                             |
| 103   | 124 | 2376.1840 | 2375.1767 | 2375.2220 | -19.1 | 0 | K.LLSDAGIYVISDLSEPSVYSIK.D             |
| 103   | 128 | 2831.2972 | 2830.2899 | 2830.4236 | -47.2 | 1 | K.LLSDAGIYVISDLSEPSVYSIKDIFK.W         |
| 125   | 136 | 1564.7377 | 1563.7304 | 1563.7205 | 6.33  | 1 | R.DDFRMDVELYER.Y                       |
| 129   | 136 | 1109.6158 | 1108.6085 | 1108.5189 | 90.8  | 0 | K.MVELYER.Y                            |
| 190   | 204 | 1679.8419 | 1678.8346 | 1678.7951 | 23.8  | 0 | R.HGVVYASMSQYDIE.E                     |
| 205   | 219 | 1804.7452 | 1803.7379 | 1803.7004 | 20.7  | 0 | R.EQIADYTRCOODSE.I                     |
| 220   | 233 | 1824.7874 | 1823.7801 | 1823.7977 | -9.68 | 0 | R.SIYMSYMSHCKE.S                       |
| 234   | 246 | 1403.6371 | 1402.6298 | 1402.5671 | 44.7  | 0 | K.SDMQDSQYADQAK.F + Oxidation (S)      |
| 247   | 271 | 2843.1309 | 2842.1236 | 2842.2333 | -38.6 | 0 | K.FFDYRYYVYFAEYOCHEPDAAGR.I            |
| 272   | 283 | 1458.7453 | 1457.7380 | 1457.6926 | 31.2  | 0 | R.IFDETTALYEEK.V                       |
| 320   | 326 | 849.5226  | 848.5153  | 848.4392  | 89.7  | 0 | K.DFAQLK.E                             |
| 328   | 344 | 1948.8530 | 1947.8457 | 1947.9538 | -55.3 | 0 | K.AMDAKPSGVEEDSYEPTQK.A                |
| 359   | 377 | 2116.9422 | 2115.9349 | 2115.9639 | -13.7 | 0 | R.AHSVLPVYVSDLCCDQYK.S                 |
| 359   | 377 | 2132.9126 | 2131.9053 | 2131.9588 | -29.1 | 0 | R.AHSVLPVYVSDLCCDQYK.S + Oxidation (S) |
| 380   | 388 | 1003.8582 | 1002.8509 | 1002.8804 | 70.3  | 0 | R.SCVFAMLR.A                           |
| 389   | 404 | 1889.8792 | 1888.8719 | 1888.8618 | 3.38  | 1 | K.AMDNIDIFGYICQDKE.K                   |
| 391   | 404 | 1691.8289 | 1690.8216 | 1690.7297 | 94.3  | 0 | K.DYNDIFQYICQDKE.K                     |
| 391   | 405 | 1819.7831 | 1818.7858 | 1818.8247 | -37.9 | 1 | K.DYNDIFQYICQDKE.I                     |
| 431   | 443 | 1548.8049 | 1547.7976 | 1547.7871 | 6.78  | 0 | K.LAYILDAYYTSQK.S                      |
| 444   | 452 | 984.4819  | 983.4746  | 983.4818  | 74.0  | 0 | K.SAADACDFK.G                          |

Spot No.: **69**

Mascot score: **91**

Species: *Fusarium oxysporum Fo5176*

Protein name: **phosphoglycerate mutase family protein, putative**

NCBI accession No.: **gi| 342872822**      Sequence coverage %: **70**

Matched peptides No.: **8**      Total peptides No.: **61**

Calculated Mr: **12416**      Calculated pI: **5.21**

### Annotated PMF spectra:

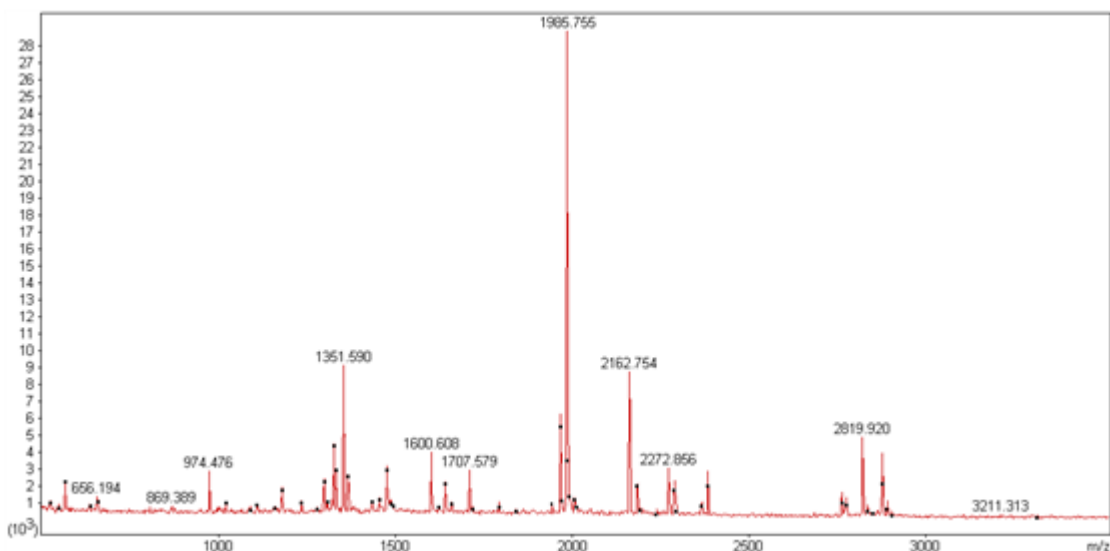

### Probability Based Mowse Score:

Protein score is  $-10 \cdot \log(P)$ , where P is the probability that the observed match is a random event. Protein scores greater than 75 are significant ( $p < 0.05$ ).

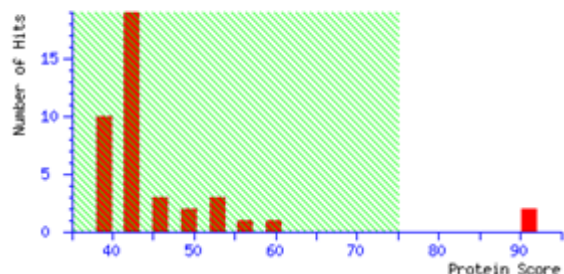

Matched peptide sequences: shown in **Bold Red**

1 **MGWFDNTEV V**ENFNEYNQ**N SENREHHA**KL **SHEIIGGAAA** YEA**AKAYEEH**  
51 **VAR**NGKPDS**H AQAKEFIAGA** **VGAFVDREFE** **TKGLDFFDRE** **EAKRHGERKA**  
101 HRELEE**QY**

Matched peptides information:

| Start | End | Observed  | Mr (expt) | Mr (calc) | ppm   | M | Peptide                    |
|-------|-----|-----------|-----------|-----------|-------|---|----------------------------|
| 2     | 24  | 2819.9198 | 2818.9125 | 2818.1855 | 258   | 0 | M.GWFDNTEVVENFNEYNQNSENR.E |
| 30    | 45  | 1600.6083 | 1599.6010 | 1599.8256 | -140  | 0 | K.LSHEIIGAAAAYEAAK.A       |
| 46    | 53  | 974.4764  | 973.4691  | 973.4617  | 7.56  | 0 | K.AYEEIVAR.N               |
| 65    | 77  | 1351.5898 | 1350.5825 | 1350.6932 | -81.9 | 0 | K.EFLAGAVGAFVDR.E          |
| 65    | 82  | 1985.7550 | 1984.7477 | 1984.9894 | -122  | 1 | K.EFLAGAVGAFVDREFETK.G     |
| 65    | 82  | 1986.1287 | 1985.1214 | 1984.9894 | 66.5  | 1 | K.EFLAGAVGAFVDREFETK.G     |
| 83    | 89  | 869.3893  | 868.3820  | 868.4079  | -29.8 | 0 | K.GLDFFDR.E                |
| 83    | 93  | 1326.5130 | 1325.5057 | 1325.6252 | -90.1 | 1 | K.GLDFFDREAK.R             |

Spot No.: **70**

Mascot score: **217**

Species: *Fusarium oxysporum f. sp. cubense race 1*

Protein name: **Hsp 70 kda**

NCBI accession No.: **gi| 477507989**      Sequence coverage %: **53**

Matched peptides No.: **25**      Total peptides No.: **46**

Calculated Mr: **71132**      Calculated pI: **5.00**

### Annotated PMF spectra:

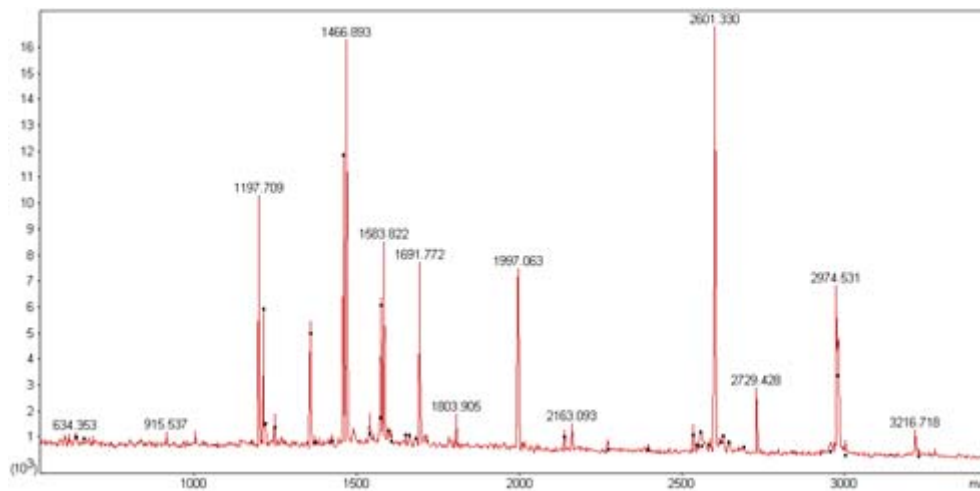

### Probability Based Mowse Score:

Protein score is  $-10 \cdot \log(P)$ , where P is the probability that the observed match is a random event. Protein scores greater than 75 are significant ( $p < 0.05$ ).

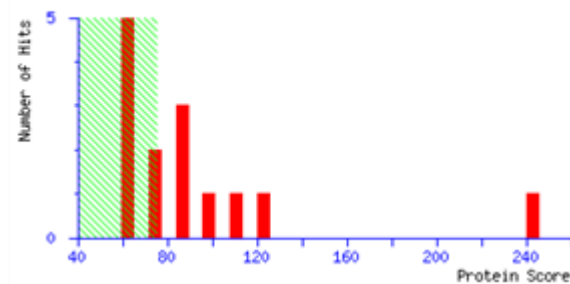

## Matched peptide sequences: shown in **Bold Red**

```

1  MAPAVGIDLG TTYSCVGIFR EDRCDIAND QGNRTTPSFV GFTDTERLIG
51 DAAKNQVAMN PQNTVFDAGR LIGRKFADPE VQADMKHFPF KIVDKGGKPN
101 IEVEFKGETK TFTPEEISAM ILTKMRETAE SYLGETVNNA VVTVPAYFND
151 SQRQATKDAG LIAGLNLVRI INEPTAAAIA YGLDKKVEGE RNVLI FDLGG
201 GTFDVSLTI EEGIFEVKST AGDTHLGGED FDNRLVNHFV NEFKRKHKKD
251 LSTNVRALRR LRTACERAKR TLSSSAQTSI EIDSLFEGID FYTSITRARF
301 EELCQDLRSR TIQPVDRVLT DAKIDKSLVH EIVLVGGSTR IPRVQKLITD
351 YFNGKEPNKS INPDEAVAYG AAVQAAILSG DTSSKATNEI LLLDVAPLSL
401 GIETAGMMT KLIPRNTTIP TKKSEVFSTF SDNQPGVLIQ VYEGERQRTK
451 DNNLMGKFEL TGIPPAPRGV PQIEVTFDLD ANGIMNVAV EKGTGKSNKI
501 VIINDKGRLS KEEIERMLND AEKYKEEDEA EGKRVAAKNG LESYAYSLRN
551 TILSDPKVEEK IEASDKETLT AEIDKVVQWL DDNQQATREE YEEHQKELEG
601 KANPIMMKFY GAGGEGAPGG MPPGGGGFPG AGGPGGAPGA GGDDGPTVEE
651 VD

```

## Matched peptides information:

| Start - End | Observed  | Mr (expt) | Mr (calc) | ppm  | M | Peptide                                                  |
|-------------|-----------|-----------|-----------|------|---|----------------------------------------------------------|
| 2 - 20      | 1997.0625 | 1996.0552 | 1996.0088 | 23.2 | 0 | M.APAVGIDL <b>TTYSCVGIFR</b> .E                          |
| 2 - 23      | 2397.2500 | 2396.2427 | 2396.1795 | 26.4 | 1 | M.APAVGIDL <b>TTYSCVGIFREDR</b> .C                       |
| 35 - 47     | 1457.7492 | 1456.7419 | 1456.6835 | 40.1 | 0 | R. <b>TTFSPVQFTDTER</b> .L                               |
| 96 - 106    | 1217.6915 | 1216.6842 | 1216.6452 | 32.1 | 0 | K. <b>GGKRNIEVEFK</b> .G                                 |
| 111 - 124   | 1596.8277 | 1595.8204 | 1595.8116 | 5.50 | 0 | K. <b>TFTFREISAMILTK.M</b> + Oxidation (0)               |
| 127 - 153   | 2974.5312 | 2973.5239 | 2973.3992 | 41.9 | 0 | R. <b>ETAESYLGETVBNNAVVTVPAYFND</b> SQR.Q                |
| 158 - 169   | 1211.7682 | 1210.7609 | 1210.7034 | 47.6 | 0 | K. <b>DAGLIAGLNLVLR</b> .I                               |
| 170 - 185   | 1659.9102 | 1658.9029 | 1658.8879 | 9.06 | 0 | R. <b>IINEPTAAAIA</b> YGLDK.K                            |
| 219 - 234   | 1691.7720 | 1690.7647 | 1690.7183 | 27.4 | 0 | K. <b>STAGDTHLGGED</b> FDNR.L                            |
| 235 - 244   | 1246.6876 | 1245.6803 | 1245.6506 | 23.9 | 0 | R. <b>LVNHFVNEFK</b> .R                                  |
| 271 - 297   | 2981.6042 | 2980.5969 | 2980.4553 | 47.5 | 0 | R. <b>TLSSSAQTSIEIDSLFEGID</b> FYTSITR.A                 |
| 310 - 317   | 915.5368  | 914.5295  | 914.4821  | 51.8 | 0 | R. <b>STIQPVDR</b> .V                                    |
| 327 - 340   | 1466.8928 | 1465.8855 | 1465.8253 | 41.1 | 0 | K. <b>SLVHEIVLVGGSTR</b> .I                              |
| 347 - 359   | 1538.8155 | 1537.8082 | 1537.7776 | 19.9 | 1 | K. <b>LITDYFNGKEPNK</b> .S                               |
| 360 - 385   | 2535.3462 | 2534.3389 | 2534.2500 | 35.1 | 0 | K. <b>SINPDEAVAYGAAVQAAILSGDTSSK</b> .A                  |
| 386 - 411   | 2690.4662 | 2689.4589 | 2689.3918 | 25.0 | 0 | K. <b>ATNEILLLDVAPLSLGIETAGOMMTK.L</b> + 2 Oxidation (0) |
| 423 - 446   | 2729.4277 | 2728.4204 | 2728.3344 | 31.5 | 1 | K. <b>KSEVFSTFSDNQPGVLIQVYEGER</b> .Q                    |
| 424 - 446   | 2601.3303 | 2600.3230 | 2600.2395 | 32.1 | 0 | K. <b>SEVFSTFSDNQPGVLIQVYEGER</b> .Q                     |
| 458 - 468   | 1197.7095 | 1196.7022 | 1196.6553 | 39.2 | 0 | K. <b>FELTGIPAPR</b> .G                                  |
| 469 - 492   | 2546.3613 | 2545.3540 | 2545.2734 | 31.7 | 0 | R. <b>GVQIEVTFDLDANGIMNVAVEK</b> .G                      |
| 469 - 492   | 2562.3555 | 2561.3482 | 2561.2683 | 31.2 | 0 | R. <b>GVQIEVTFDLDANGIMNVAVEK.G</b> + Oxidation (0)       |
| 561 - 566   | 662.3615  | 661.3542  | 661.3282  | 39.3 | 0 | K. <b>IEASDK</b> .E                                      |
| 576 - 588   | 1572.8122 | 1571.8049 | 1571.7692 | 22.7 | 0 | K. <b>VVQMLDNDNQATR</b> .E                               |
| 576 - 596   | 2645.3388 | 2644.3315 | 2644.2153 | 43.9 | 1 | K. <b>VVQMLDNDNQATREYEERQK</b> .E                        |
| 589 - 601   | 1647.8036 | 1646.7963 | 1646.7423 | 32.8 | 1 | R. <b>EYEYEHQKELEGK</b> .A                               |

Spot No.: **71**

Mascot score: **174**

Species: ***Fusarium oxysporum Fo5176***

Protein name: **hsp 90**

NCBI accession No.: **gi| 342889878**      Sequence coverage %: **41**

Matched peptides No.: **26**      Total peptides No.: **67**

Calculated Mr: **79285**      Calculated pI: **4.85**

### Annotated PMF spectra:

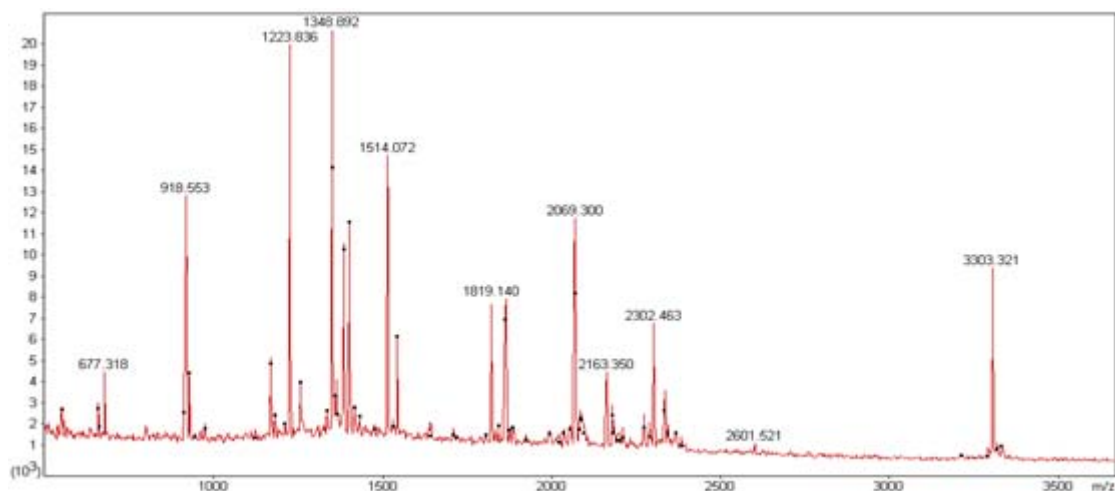

### Probability Based Mowse Score:

Protein score is  $-10 \cdot \log(P)$ , where P is the probability that the observed match is a random event. Protein scores greater than 75 are significant ( $p < 0.05$ ).

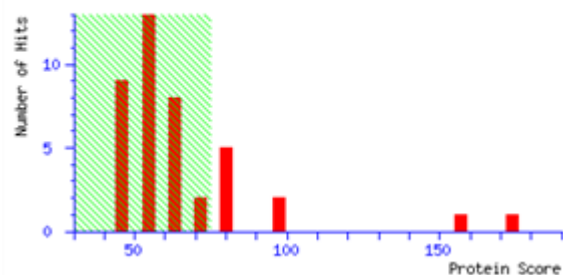



Matched peptide sequences: shown in **Bold Red**

```

1 MSETFEFQAE ISQLLSLIIN TVYSNKEIFL RELVSNASDA LDKIRYKALS
51 DPSQLDSGKD LRIDIIPDKA NKTLTIRDG IGMTKADLVN NLGTIARSGT
101 KQFMEALTAG ADVSMIGQFG VGFYSAYLVA DQVRVISKNN DDEQYVWESS
151 AGGTFSITED TEGEPLGRGT AIILHLKDEQ TEYLNESKIK EVIKKHSEFI
201 SYPIYLHVEK ETEKEVPDEE AEEVTEEGDD KKPKEEVDD DEEEKPKPTK
251 KIKETKIEEE ELNKQKPIWT RNPQDISQEE YASFYKSLSN DWEDHLAVKH
301 PSVEGQLEFR AILFVPKRAP FDLFETKTK NNIKLYVRRV FITDDATDLI
351 PEWLGFVKGV VDSIDLPLNL SRETQQNKI MKVIKKNIVK KSLELFQEIA
401 EDKEQFDKfy SAFSKNLKLG IHEDSQNRSI LAKLLRFNST KSGDELTSLS
451 DYVTRMPEHQ NNMYYITGES IKAVSKSPFL DALREKGFEV LFLVDPIDEY
501 AMTQLKEFEG KKLVDITKDF ELEETEDEKK AREAEEEKEYE SLAKALKNVL
551 GDKVEKVVVS HKLGTSPCAI RTGQFGWSAN MERIMKAQAL RDTSMSSYMS
601 SKKTFEISPK SPIVQELKKK VETDGENDRT VKSIVQLLFE TSLLVSGFTI
651 DEPAGFADRI HKLVQLGLNI EEDDSAPAEA DAATDAPAAA TGDSAMEEVD

```

Matched peptides information:

| Start - End | Observed  | Mr (expt) | Mr (calc) | ppm   | M | Peptide                                    |
|-------------|-----------|-----------|-----------|-------|---|--------------------------------------------|
| 27 - 31     | 677.3177  | 676.3104  | 676.3908  | -119  | 0 | K.EIFLR.E                                  |
| 86 - 97     | 1256.8894 | 1255.8821 | 1255.6884 | 154   | 0 | K.ADLVNLGTIAR.S                            |
| 139 - 168   | 3303.3214 | 3302.3141 | 3302.4124 | -29.7 | 0 | K.NNDDEQYVWESSAGOTFSITEDTEGEPLGR.G         |
| 169 - 188   | 2302.4627 | 2301.4554 | 2301.1852 | 117   | 1 | R.GT <sup>A</sup> IILHLKDEQTEYLNESK.I      |
| 196 - 210   | 1862.2485 | 1861.2412 | 1860.9410 | 161   | 0 | K.HSEFISYPIYLHVEK.E                        |
| 215 - 234   | 2273.4426 | 2272.4353 | 2272.0230 | 181   | 1 | K.EVFDREAEVTEEGDDKPK.I                     |
| 235 - 245   | 1349.6935 | 1348.6862 | 1348.5518 | 99.7  | 0 | K.IEEVDDDEEK.K                             |
| 265 - 271   | 928.5720  | 927.5647  | 927.5290  | 38.5  | 0 | K.QKPIWTR.N                                |
| 272 - 286   | 1819.1402 | 1818.1329 | 1817.8108 | 177   | 0 | R.NPQDISQEEYASFYK.S                        |
| 300 - 310   | 1348.8922 | 1347.8849 | 1347.6572 | 169   | 0 | K.HPSVEGQLEFR.A                            |
| 311 - 318   | 943.5204  | 942.5131  | 942.6015  | -93.8 | 1 | R.AILFVPRR.A                               |
| 318 - 327   | 1223.8355 | 1222.8282 | 1222.6346 | 158   | 1 | K.RAPFDLFETK.K                             |
| 339 - 358   | 2335.5074 | 2334.5001 | 2334.2260 | 117   | 1 | R.RVFITDDATDLIPEWLGQVK.G                   |
| 340 - 358   | 2179.4058 | 2178.3985 | 2178.1249 | 126   | 0 | R.VFITDDATDLIPEWLGQVK.G                    |
| 359 - 372   | 1514.0720 | 1513.0647 | 1512.7784 | 189   | 0 | K.GVVDSIDLPLNLSR.E                         |
| 392 - 408   | 2069.2999 | 2068.2926 | 2068.0000 | 141   | 1 | K.SLELFQEI <sup>A</sup> EDKEQFDK.F         |
| 419 - 428   | 1168.7413 | 1167.7340 | 1167.5632 | 146   | 0 | K.LGIEHEDSQNR.S                            |
| 456 - 472   | 2055.2621 | 2054.2548 | 2053.9237 | 161   | 0 | R.MPEHQNNMYYITGESIK.A                      |
| 456 - 472   | 2071.1950 | 2070.1877 | 2069.9186 | 130   | 0 | R.MPEHQNNMYYITGESIK.A + Oxidation (0)      |
| 456 - 472   | 2087.2394 | 2086.2321 | 2085.9135 | 153   | 0 | R.MPEHQNNMYYITGESIK.A + 2 Oxidation (0)    |
| 477 - 484   | 918.5528  | 917.5455  | 917.4971  | 52.8  | 0 | K.SPFLDALR.E                               |
| 485 - 506   | 2601.5215 | 2600.5142 | 2600.3084 | 79.2  | 1 | R.ERDFEVLFLVDPIDEYAMTQLK.E + Oxidation (0) |
| 487 - 506   | 2344.4203 | 2343.4130 | 2343.1708 | 103   | 0 | K.GFEVLFLVDPIDEYAMTQLK.E + Oxidation (0)   |
| 563 - 571   | 974.5456  | 973.5383  | 973.5015  | 37.8  | 0 | K.LOTSPCAIR.T                              |
| 572 - 583   | 1383.8868 | 1382.8795 | 1382.6037 | 199   | 0 | R.TQGFQMSANMER.I                           |
| 572 - 583   | 1399.8642 | 1398.8569 | 1398.5986 | 185   | 0 | R.TQGFQMSANMER.I + Oxidation (0)           |

Spot No.: **72**

Mascot score: **81**

Species: ***Ogataea parapolymorpha DL-1***

Protein name: **tRNA ligase**

NCBI accession No.: **gi| 320580493**      Sequence coverage %: **25**

Matched peptides No.: **17**      Total peptides No.: **91**

Calculated Mr: **91382**      Calculated pI: **6.15**

### Annotated PMF spectra:

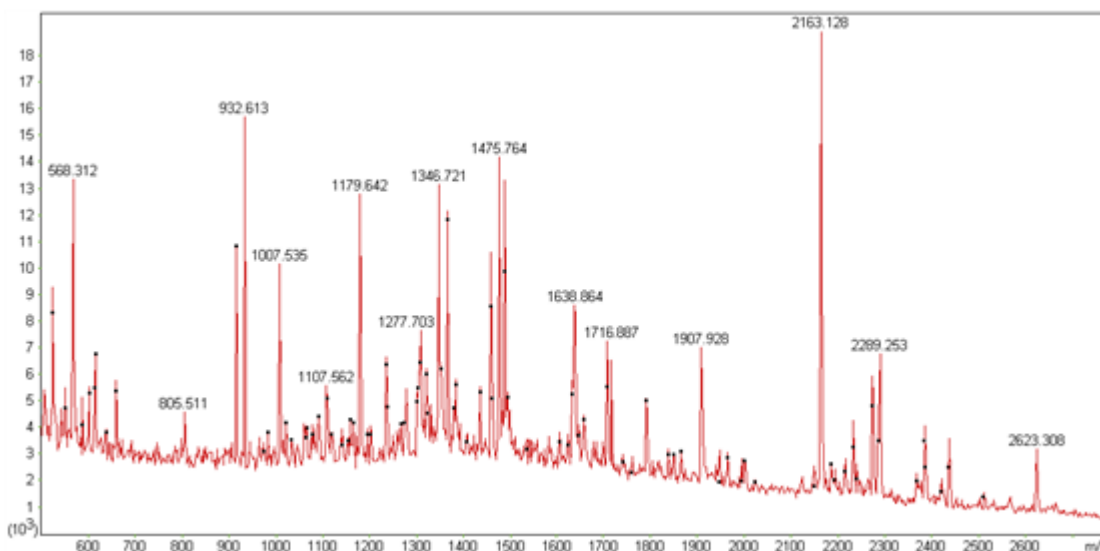

### Probability Based Mowse Score:

Protein score is  $-10 \cdot \log(P)$ , where P is the probability that the observed match is a random event. Protein scores greater than 75 are significant ( $p < 0.05$ ).

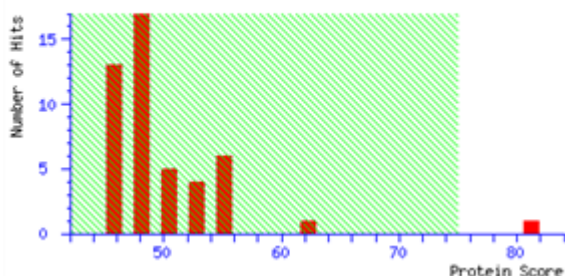

## Matched peptide sequences: shown in **Bold Red**

1 **MNILD**LQIER **VSQDESEKSK** **QLVSELEELS** RSTAKRGIVK KYTNIIDGSD  
 51 VQISSWRFNE WDYSSKKVKL PIYARGLFTV GDRIVCRGYD KFFNVDELGS  
 101 VSRKALQETT TGPYTLTVKA **NGCIVFISGL** **EDGTLVVCSK** **HSTGYRDDLT**  
 151 **RNHALAAQAA** **LKRQLEKNDI** **NSTDLAKTLY** QLGITAVAAY CDDSFEEHIL  
 201 EYTQEKAGLY LHGLNYNTCN FKTCMAVVT **KFAQAFGFKT** IDYFEVPTFE  
 251 ETMELLEKAS ETGLHNGEEI EGFVVRQKD SSDFFFKYKF EEPYLLYREL  
 301 **REVTQYLYTK** GLDNVSFKNH **KLICMDYLK**F VIPLFDADPS LKENYLKDKG  
 351 **IVKLRKLYME** HKQKSGSEII KEEQSMEKLE EELKCAGYGQ DTCKYVLVTV  
 401 ATIGCGKTTT SMTLANLFPD LIGVVQSDDI PSPIKNKQVA **KCLEVLVEKP**  
 451 **IVILDRNNHK** FIERQQTFEY FADLNKLIPT SKLKFICLNF LGNMSKNDPK  
 501 LWEITRARVL ERGDNHQSIK VERDGSYKAE MIMK**GFLGRF** **QPVEK**DKFPD  
 551 SRFDHVIDLR VDKDSSLENA KLIARRLAEI ATDVNLQYPS EEQFLEAYQK  
 601 ALDFKPVVTK NFKTK**KEKPQ** **YFGILVDDID** **KLAQLHEIGF** FKQLQEANRV  
 651 KKEFHITLIH LGSTKKNPPM **KTIYQNYCEL** **IKDMEK**VNDQ IELPYKADAR  
 701 LFRICWNSRV **MCIEAEVKRI** **YGEEGERLDS** **LGIGNKYPHI** TVGTVSEKVR  
 751 ALESNKLLSD LHDFGDENIN TLDLNIELNQ LPVVFVHY

## Matched peptides information:

| Start | End | Observed  | Mr(expt)  | Mr(calc)  | ppm   | M | Peptide                                          |
|-------|-----|-----------|-----------|-----------|-------|---|--------------------------------------------------|
| 1     | 18  | 2163.1276 | 2162.1203 | 2162.0525 | 31.4  | 1 | - .MNILD <b>LQIER</b> VSQDESEK.S + Oxidation (0) |
| 21    | 31  | 1302.6616 | 1301.6543 | 1301.6827 | -21.8 | 0 | K.QLVSELEELSR.S                                  |
| 120   | 140 | 2239.2893 | 2238.2820 | 2238.1025 | 80.2  | 0 | K.ANGCIVFISOLED <b>GTLVVCSK</b> .H               |
| 141   | 151 | 1320.6265 | 1319.6192 | 1319.6218 | -1.97 | 1 | K.HSTGYRDDLTR.N                                  |
| 147   | 162 | 1707.8016 | 1706.7943 | 1706.9063 | -65.6 | 1 | R.DDLTR <b>RNHALAAQAALK</b> .R                   |
| 152   | 162 | 1107.5616 | 1106.5543 | 1106.6196 | -59.0 | 0 | R. <b>RNHALAAQAALK</b> .R                        |
| 168   | 177 | 1090.5502 | 1089.5429 | 1089.5302 | 11.7  | 0 | K.NDINSTLAK.T                                    |
| 232   | 239 | 915.5906  | 914.5833  | 914.4650  | 129   | 0 | K.FAQAF <b>PKT</b> .T                            |
| 302   | 310 | 1109.5407 | 1108.5334 | 1108.6128 | -71.6 | 1 | R.EVT <b>QYLYTK</b> .G                           |
| 319   | 329 | 1434.7611 | 1433.7538 | 1433.7159 | 26.5  | 1 | K.N <b>KLICMDYLK</b> .F                          |
| 348   | 353 | 659.5137  | 658.5064  | 658.4014  | 160   | 1 | K.D <b>RGIVK</b> .L                              |
| 442   | 460 | 2289.2526 | 2288.2453 | 2288.2674 | -9.67 | 1 | K.C <b>LEVLVEKPIVILDRNNHK</b> .F                 |
| 535   | 545 | 1277.7030 | 1276.6957 | 1276.6928 | 2.28  | 1 | K. <b>GFLGRFQPVEK</b> .D                         |
| 616   | 631 | 1907.9278 | 1906.9205 | 1907.0040 | -43.8 | 1 | K. <b>KEKPQYFGILVDDIDK</b> .L                    |
| 672   | 686 | 1964.0324 | 1963.0251 | 1962.9067 | 60.4  | 1 | K. <b>TIYQNYCELIKDMEK</b> .V + Oxidation (0)     |
| 710   | 719 | 1234.6850 | 1233.6777 | 1233.6209 | 46.0  | 1 | R.V <b>MCIEAEVKRI</b> .I                         |
| 720   | 736 | 1849.9357 | 1848.9284 | 1848.9217 | 3.62  | 1 | R. <b>YGEEGERLDSLGIGNK</b> .Y                    |

Spot No.: **73**

Mascot score: **117**

Species: *Fusarium oxysporum f. sp. cubense race 1*

Protein name: **Hsp 70 kda**

NCBI accession No.: **gi| 477507989**

Sequence coverage %: **46**

Matched peptides No.: **21**

Total peptides No.: **61**

Calculated Mr: **71132**

Calculated pI: **5.00**

### Annotated PMF spectra:

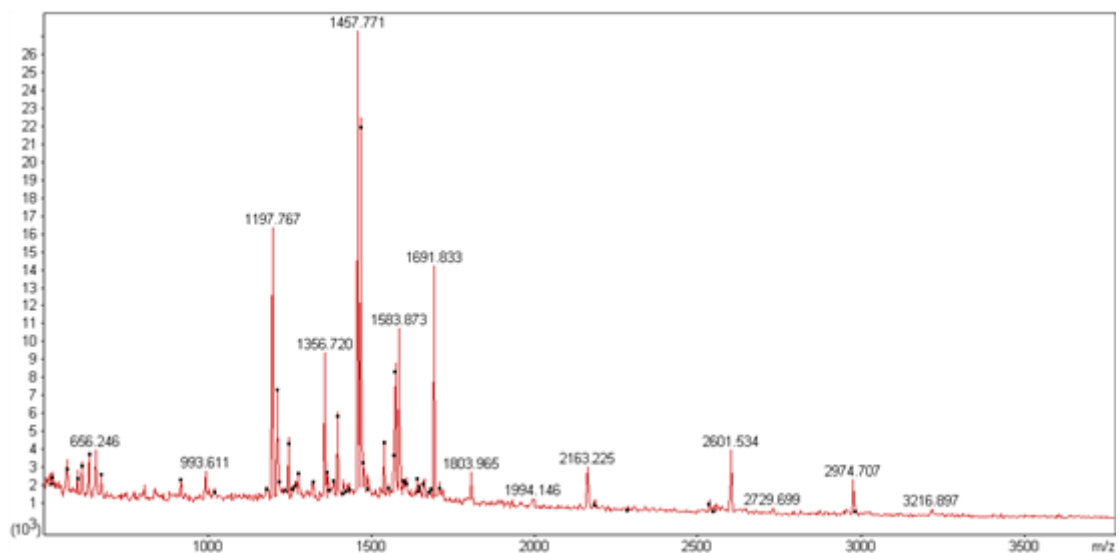

### Probability Based Mowse Score:

Protein score is  $-10 \cdot \log(P)$ , where P is the probability that the observed match is a random event. Protein scores greater than 75 are significant ( $p < 0.05$ ).

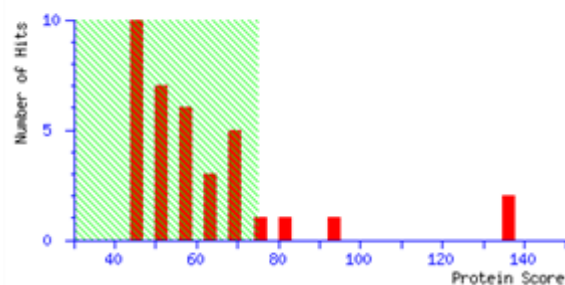

Matched peptide sequences: shown in **Bold Red**

1 MAPAVGIDLG TTYSCVGIFR EDRCIIAND **QGNRTTPSFV** GFTDTERLIG  
 51 **DAAKNQVAMN** **PQNTVFDAKR** LIGRKFDPE VQADMKHFPP KIVDKGGKPN  
 101 **IEVEFKGETK** **TFTPEEISAM** ILTKMRETAE SYLGETVNNA VVTVPAYFND  
 151 **SQRQATKDAG** **LIAGLNVLRI** INEPTAAAIA YGLDKKVEGE RNVLIFDLGG  
 201 GTFDVSLITI EEGIFEVKST AGDTHLGGED FDNRLVNHFV NEFKRKHKKD  
 251 LSTNVRALRR LRTACERAKR **TLSSSAQTSI** EIDSLFEGID FYTSITRARF  
 301 EELCQDLSRS **TIQPVDRVLT** DAKIDKSLVH EIVLVGGSTR IPRVQKLITD  
 351 YFNGKEPNKS **INPDEAVAYG** **AAVQAAILSG** DTSSKATNEI LLLDVAPLSL  
 401 GIETAGGMMT KLIPRNTTIP **TKKSEVFSTF** **SDNQPGVLIQ** **VYEGERQRTK**  
 451 **DNNLMGKFEL** **TGIPPAPRGV** PQIEVTFDLD ANGIMNVS AV EKGIGKSNKI  
 501 VITNDKGRSL KEEIERMLND AEKYKEEDEA EGKRVAANKG LESYAYSLRN  
 551 TLSDPKVEEK IEASDKETLT AEIDKVVQWL **DDNQQATREE** **YEEHQKELEG**  
 601 **KANPIMMKFY** GAGGEGAPGG MPGGPGGFPG AGGPGGAPGA GGDDGPTVEE  
 651 VD

Matched peptides information:

| Start - End | Observed  | Mr(expt)  | Mr(calc)  | ppm  | M | Peptide                            |
|-------------|-----------|-----------|-----------|------|---|------------------------------------|
| 24 - 34     | 1275.6539 | 1274.6466 | 1274.5673 | 62.2 | 0 | R.CDIIANDQQR.T                     |
| 35 - 47     | 1457.7706 | 1456.7633 | 1456.6835 | 54.8 | 0 | R.TTPSFVQFTDTER.L                  |
| 55 - 69     | 1676.8830 | 1675.8757 | 1675.7988 | 45.9 | 0 | K.NQVAMNPQNTVFDAK.R                |
| 76 - 86     | 1266.6897 | 1265.6824 | 1265.5590 | 96.9 | 0 | K.FADPEVQADMK.H + Oxidation (0)    |
| 96 - 106    | 1217.7190 | 1216.7117 | 1216.6452 | 54.7 | 0 | K.OGRPNIEVEFK.G                    |
| 111 - 124   | 1596.8711 | 1595.8638 | 1595.8116 | 32.7 | 0 | K.TFTPEEISAMILTK.M + Oxidation (0) |
| 127 - 153   | 2974.7066 | 2973.6993 | 2973.3992 | 101  | 0 | R.ETASVYLGSETVNNAVVTVPAYFNDSSQR.Q  |
| 158 - 169   | 1211.7991 | 1210.7918 | 1210.7034 | 73.1 | 0 | K.DAQLIAGLNVLR.I                   |
| 170 - 185   | 1659.9481 | 1658.9408 | 1658.8879 | 31.9 | 0 | R.IINEPTAAAIAAYGLDK.K              |
| 219 - 234   | 1691.8326 | 1690.8253 | 1690.7183 | 63.3 | 0 | K.STAGDTHLGGEDFDNR.L               |
| 235 - 244   | 1246.7109 | 1245.7036 | 1245.6506 | 42.6 | 0 | R.LVNHVNEFK.R                      |
| 271 - 297   | 2981.8155 | 2980.8082 | 2980.4553 | 118  | 0 | R.TLSSSAQTSIEIDSLFEGIDFYTSITR.A    |
| 310 - 317   | 915.5988  | 914.5915  | 914.4821  | 120  | 0 | R.STIQPVDR.V                       |
| 327 - 340   | 1466.9096 | 1465.9023 | 1465.8253 | 52.6 | 0 | K.SLVHEIVLVGGSTR.I                 |
| 360 - 385   | 2535.4723 | 2534.4650 | 2534.2500 | 84.8 | 0 | K.SINPDEAVAYGAAVQAAILSGDTSSK.A     |
| 423 - 446   | 2729.6986 | 2728.6913 | 2728.3344 | 131  | 1 | K.KSEVFSTFSDNQPGVLIQVYEGER.Q       |
| 424 - 446   | 2601.5344 | 2600.5271 | 2600.2395 | 111  | 0 | K.SEVFSTFSDNQPGVLIQVYEGER.Q        |
| 449 - 457   | 1020.5838 | 1019.5765 | 1019.5070 | 68.2 | 1 | R.TKDNLMGK.F                       |
| 458 - 468   | 1197.7666 | 1196.7593 | 1196.6553 | 86.9 | 0 | K.FELTGIPPAPR.G                    |
| 576 - 588   | 1572.8589 | 1571.8516 | 1571.7692 | 52.4 | 0 | K.VVQWLDNQQATR.E                   |
| 589 - 601   | 1647.8075 | 1646.8002 | 1646.7423 | 35.2 | 1 | R.EEYEHQKELEGK.A                   |

Spot No.: **74**

Mascot score: **110**

Species: *Fusarium oxysporum Fo5176*

Protein name: **hsp 90**

NCBI accession No.: **gi| 342889878**      Sequence coverage %: **34**

Matched peptides No.: **19**      Total peptides No.: **59**

Calculated Mr: **79285**      Calculated pI: **4.85**

### Annotated PMF spectra:

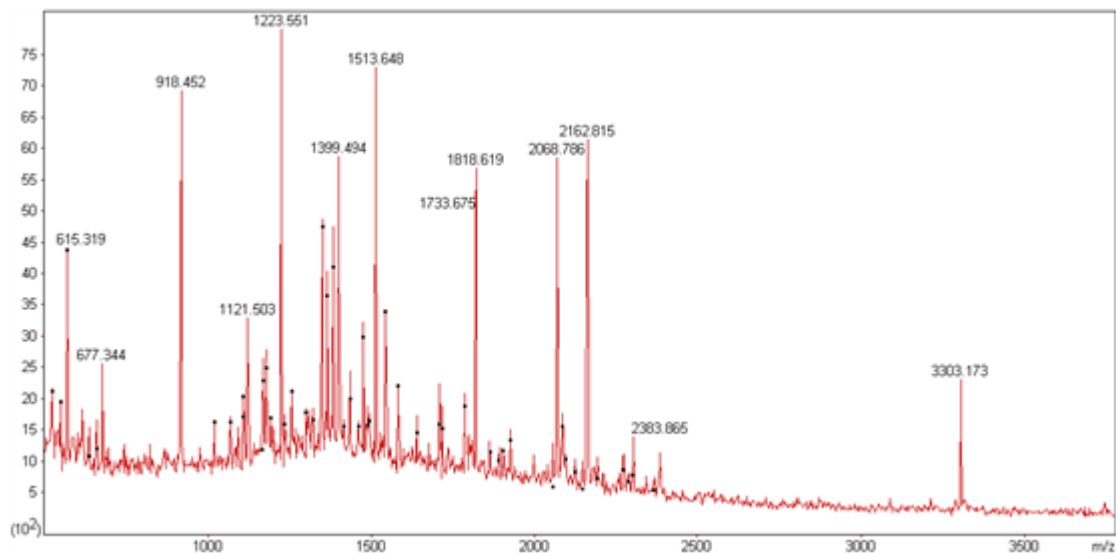

### Probability Based Mowse Score:

Protein score is  $-10 \cdot \log(P)$ , where P is the probability that the observed match is a random event. Protein scores greater than 75 are significant ( $p < 0.05$ ).

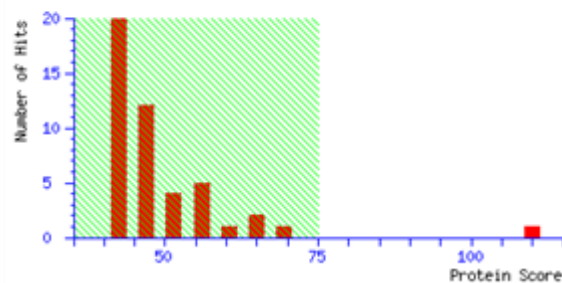

Matched peptide sequences: shown in **Bold Red**

```

1 MSETFEFQAE ISQLLSLIIN TVYSNKEIFL RELVSNASDA LDKIRYKALS
51 DPSQLDSGKD LRIDIIPDKA NKTLTIRD TG IGMTKADLVN NLGTIARSGT
101 KQFMEALTAG ADVSMIGQFG VGFYSAYLVA DQVRVISKNN DDEQYVWESS
151 AGGTFSITED TEGEPLGRGT AIILHLKDEQ TEYLNESKIK EVIKKHSEFI
201 SYPIYLHVEK ETEKEVPDEE ABEVTEEGDD KKPKIEEVDD DEEEKKPKTK
251 KIKETKIEEE ELNKQKPIWT RNPQDISQEE YASFYKSLSN DWEDHLAVKH
301 FSVEGQLEFR AILFVPKRAP FDLFETKKTK NNIKLYVRRV FITDDATDLI
351 PEWLG FVKG V DSEDLPNL SRET LQQNKI MKVIKKNIVK KSLELFQEIA
401 EDKEQFDK FY SAFSKNLKLG IHEDSQNR SI LAKLLRFNST KSGDELTSLS
451 DYVTRMEPHQ NNMYITGES IKAVSKSPFL DALREKGFEV LFLVDPIDEY
501 AMTQLKEFEG KKLVDITKDF ELEETEDEKK AREAEEKEYE SLAKALKNVL
551 GDKVEKVVVS HKLGTSPCAI RTGQFGSAN MERIMKAQAL RDTSMSSYMS
601 SKKTFEISPK SPIVQELKKK VETDGENDR T VKSIVQLLFE TSLLVSGFTI
651 DEPAGFADRI HKLVQLGLNI EEDDSAPAEA DAATDAPAAA TGDSAMEEVD

```

Matched peptides information:

| Start - End | Observed  | Mr(expt)  | Mr(calc)  | ppm   | M | Peptide                                |
|-------------|-----------|-----------|-----------|-------|---|----------------------------------------|
| 27 - 31     | 677.3439  | 676.3366  | 676.3908  | -80.1 | 0 | K.EIFLR.E                              |
| 86 - 97     | 1256.5688 | 1255.5615 | 1255.6884 | -101  | 0 | K.ADLVSNLGTIAR.S                       |
| 139 - 168   | 3303.1726 | 3302.1653 | 3302.4124 | -74.8 | 0 | K.NRDEQYVWESSAGGTF SITEDTEGEPLGR.G     |
| 169 - 188   | 2301.9511 | 2300.9438 | 2301.1852 | -105  | 1 | R.OTAILHLKDEQTEYLNESK.I                |
| 196 - 210   | 1861.7062 | 1860.6989 | 1860.9410 | -130  | 0 | K.HSEFISYPIYLHVEK.E                    |
| 215 - 234   | 2272.8961 | 2271.8888 | 2272.0230 | -59.1 | 1 | K.EVPEEAEEVTEGDDKPK.I                  |
| 235 - 245   | 1349.4603 | 1348.4530 | 1348.5518 | -73.2 | 0 | K.IEEVDDEEEK.K                         |
| 272 - 286   | 1818.6185 | 1817.6112 | 1817.8108 | -110  | 0 | R.NPQDISQEEYASFYK.S                    |
| 287 - 299   | 1513.6480 | 1512.6407 | 1512.7209 | -53.0 | 0 | K.SLSNDEHDHLAVK.H                      |
| 319 - 327   | 1067.4489 | 1066.4416 | 1066.5335 | -86.2 | 0 | R.AFPDLFETK.K                          |
| 335 - 338   | 550.2576  | 549.2504  | 549.3275  | -140  | 0 | K.LYVR.R                               |
| 392 - 408   | 2068.7855 | 2067.7782 | 2068.0000 | -107  | 1 | K.SLELFQEIADREQFDK.F                   |
| 419 - 428   | 1168.5224 | 1167.5151 | 1167.5632 | -41.2 | 0 | K.LI IHEDSQNR.S                        |
| 442 - 455   | 1542.6073 | 1541.6000 | 1541.7209 | -78.4 | 0 | K.SGDELTSLSDYVTR.M                     |
| 456 - 472   | 2086.7197 | 2085.7124 | 2085.9135 | -96.4 | 0 | R.MFEHQNNMYITGESIK.A + 2 Oxidation (0) |
| 477 - 484   | 918.4522  | 917.4450  | 917.4971  | -56.8 | 0 | K.SPFLDALR.E                           |
| 572 - 583   | 1399.4944 | 1398.4871 | 1398.5986 | -79.7 | 0 | R.TGQFGSANMER.I + Oxidation (0)        |
| 592 - 602   | 1223.5511 | 1222.5438 | 1222.4846 | 48.5  | 0 | R.DTSMSSYMSK.K                         |
| 592 - 603   | 1383.5033 | 1382.4960 | 1382.5694 | -53.0 | 1 | R.DTSMSSYMSKK.T + 2 Oxidation (0)      |

Spot No.: **75**

Mascot score: **98**

Species: *Fusarium oxysporum Fo5176*

Protein name: **ATP synthase D chain, mitochondrial**

NCBI accession No.: **gi| 342876053**      Sequence coverage %: **60**

Matched peptides No.: **10**      Total peptides No.: **59**

Calculated Mr: **19411**      Calculated pI: **6.43**

### Annotated PMF spectra:

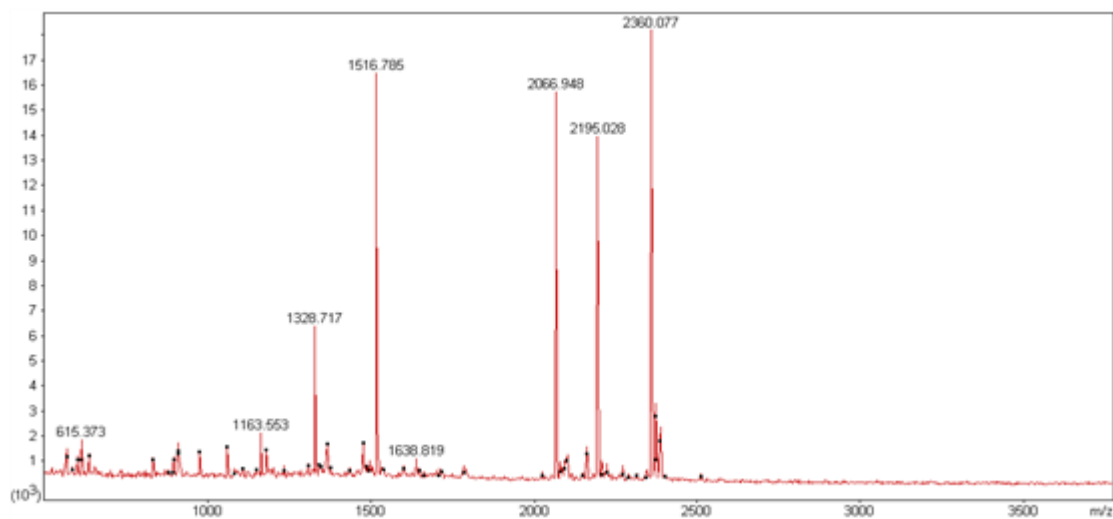

### Probability Based Mowse Score:

Protein score is  $-10 \cdot \log(P)$ , where P is the probability that the observed match is a random event. Protein scores greater than 75 are significant ( $p < 0.05$ ).

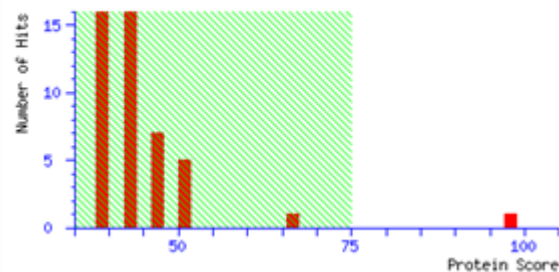



Matched peptide sequences: shown in **Bold Red**

1 MATRSAALKL **DWTKVTSSLG** **LRGQTVASLQ** **AFK****KRNEDVR** **REKVQQLQEQP**  
 51 **TTVDFSQYRS** **VLKNQAIIDE** **IEKRFSAFKP** **VTYDVSRLK** **AIDAFEAEAV**  
 101 **KNAEATKEAV** **DLELKDLAAT** **LKNIEEARPF** **EELTVDEVAA** **AEKSIDEKTA**  
 151 **QLVSKGRWMV** **PGYKEKFGDL** **AVV**

Matched peptides information:

| Start | End | Observed  | Mr (expt) | Mr (calc) | ppm     | M | Peptide                                          |
|-------|-----|-----------|-----------|-----------|---------|---|--------------------------------------------------|
| 10    | 22  | 1475.7354 | 1474.7281 | 1474.8144 | -58.5   | 1 | <b>K.LDWT</b> <b>KVTSSLG</b> <b>LRLR.G</b>       |
| 15    | 22  | 832.4769  | 831.4697  | 831.4814  | -14.1   | 0 | <b>K.VTSSLG</b> <b>LRLR.G</b>                    |
| 23    | 33  | 1149.5896 | 1148.5823 | 1148.6190 | -31.9   | 0 | <b>R.QQTVASLQ</b> <b>AFK.K</b>                   |
| 42    | 59  | 2195.0277 | 2194.0204 | 2194.1019 | -37.1   | 1 | <b>R.KVQQLQEQPTTVDFSQYR.S</b>                    |
| 43    | 59  | 2066.9481 | 2065.9408 | 2066.0069 | -32.0   | 0 | <b>K.VQQLQEQPTTVDFSQYR.S</b>                     |
| 64    | 74  | 1328.7168 | 1327.7095 | 1327.7095 | -0.0075 | 1 | <b>K.NQAIIDE</b> <b>IEKR.F</b>                   |
| 75    | 87  | 1516.7850 | 1515.7777 | 1515.7722 | 3.65    | 0 | <b>R.FSAF</b> <b>KPVTYDVSRLQ</b>                 |
| 91    | 101 | 1163.5528 | 1162.5455 | 1162.5870 | -35.7   | 0 | <b>K.AIDAFEAEAVK.N</b>                           |
| 123   | 143 | 2360.0773 | 2359.0700 | 2359.1543 | -35.7   | 0 | <b>K.NIEEARPF</b> <b>EELTVDEVA</b> <b>AAEK.S</b> |
| 158   | 164 | 896.4524  | 895.4452  | 895.4262  | 21.2    | 0 | <b>R.NHVP</b> <b>GYK.E</b> + Oxidation (0)       |

Spot No.: **76**

Mascot score: **85**

Species: *Fusarium oxysporum Fo5176*

Protein name: **Phospholipase B**

NCBI accession No.: **gi| 342872804**      Sequence coverage %: **25**

Matched peptides No.: **15**      Total peptides No.: **57**

Calculated Mr: **70452**      Calculated pI: **4.67**

### Annotated PMF spectra:

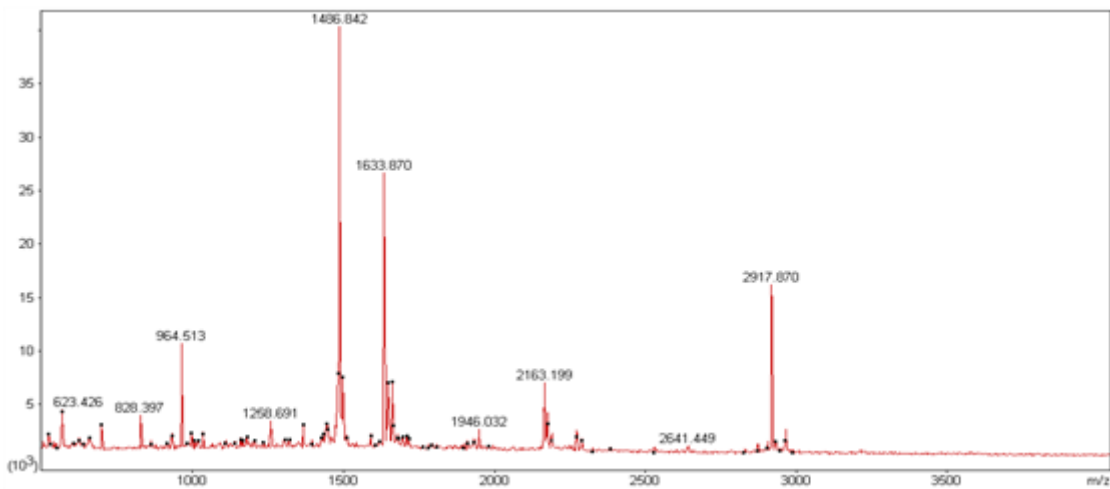

### Probability Based Mowse Score:

Protein score is  $-10 \cdot \log(P)$ , where P is the probability that the observed match is a random event. Protein scores greater than 75 are significant ( $p < 0.05$ ).

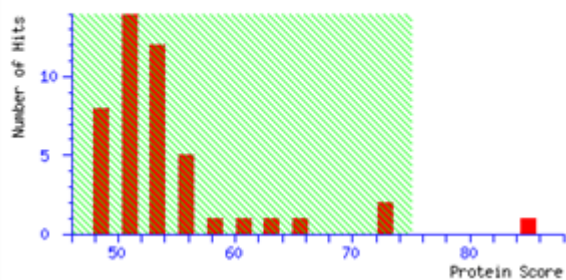

## Matched peptide sequences: shown in **Bold Red**

```

1  MLGFVALTLW  LSTAIAAPDD  TALIPRVNSV  EIRALPNSPS  GGYAPKVVDC
51  PSTRPKVRLA  DELSSEEEAW  VRRRRNNTID  DLKTFLSRAN  ISGFDAESFV
101 EKHKNNATGL  PNIAIAASGG  GYRALMNGAG  FLSAADSRNN  KTGPIISGLLQ
151 SATYLAGLSG  GGWLVGSIFA  NNFSTVPDLQ  SGEKVWRFRD  SIFKGPKSSG
201  ISLLNTAEYW  TEMKDAVDDK  DKGWNTTLD  YWGRALSYQL  VNAPEGGPSY
251  TFSSIADTSN  FKDADTPFPI  LVADGRAPGE  RVISLNATVY  EFNPYEFGTW
301 DPTTFGFVPT  EYLASNFTNG  SISSKGEQVR  GFDQIGFVMG  TSSSLFNQFL
351 LNNITKVGKE  NDIPDIVVKA  IEGVLVGLDQ  DEDIAQYTP  NPFFGWNPTD
401 KSVNSKDHQL  TLVDGGEDLQ  NIPLHPLIQP  VRGVDIIFAI  DSSADTNNNW
451 PNGTALRATY  DRVGSSIGNG  TQFPSVPSAE  TQFPSVPSAE  TQFPSVPSAE  TQFPSVPSAE  TQFPSVPSAE  TQFPSVPSAE
501 FTLSDGEVPP  PLIFYIPNAP  YTYHSNVSTF  DMSYTTAERD  NIILNALNGA
551 TQGNATIDKE  WPTCVACAVM  SRSWKANET  VPDACKTCFD  RYCWDGKSNN
601 TAVKSYEPEY  IIGNATADA  ADNAAGARLG  PSWFVSAGVG  AAALFALM

```

## Matched peptides information:

| Start - End | Observed  | Mr (expt) | Mr (calc) | ppm  | M | Peptide                               |
|-------------|-----------|-----------|-----------|------|---|---------------------------------------|
| 34 - 46     | 1258.6914 | 1257.6841 | 1257.6353 | 38.0 | 0 | R.ALFPNSPSGGYAPK.V                    |
| 47 - 56     | 1158.6505 | 1157.6432 | 1157.5863 | 49.2 | 0 | K.VVDCPSTRPK.V                        |
| 59 - 72     | 1633.8699 | 1632.8626 | 1632.7631 | 61.0 | 0 | R.LADELSSEEEAWVR.R                    |
| 76 - 83     | 932.5717  | 931.5644  | 931.4611  | 111  | 0 | R.NNTIDDLK.T                          |
| 84 - 88     | 623.4257  | 622.4184  | 622.3439  | 120  | 0 | K.TFLSR.A                             |
| 198 - 214   | 1930.0682 | 1929.0609 | 1928.9189 | 73.6 | 0 | K.SSGISLLNTAEYWTEMK.D                 |
| 198 - 214   | 1946.0323 | 1945.0250 | 1944.9139 | 57.2 | 0 | K.SSGISLLNTAEYWTEMK.D + Oxidation (O) |
| 235 - 262   | 2964.7941 | 2963.7868 | 2963.4189 | 124  | 0 | R.ALSYQLVNAPEGGPSYTFSSIADTSNFK.D      |
| 263 - 276   | 1486.8424 | 1485.8351 | 1485.7464 | 59.7 | 0 | K.DADTFPPILVADGR.A                    |
| 357 - 369   | 1425.8177 | 1424.8104 | 1424.7875 | 16.1 | 1 | K.VGRENDIPDIVVK.A                     |
| 407 - 432   | 2917.8699 | 2916.8626 | 2916.5458 | 109  | 0 | K.DBQLTLVDGGEDLQNIPLHPLIQPVR.G        |
| 458 - 462   | 625.3598  | 624.3525  | 624.2867  | 105  | 0 | R.ATYDR.V                             |
| 573 - 576   | 606.3591  | 605.3519  | 605.2962  | 92.0 | 0 | R.SWK.A                               |
| 587 - 591   | 698.3931  | 697.3858  | 697.2854  | 144  | 0 | K.TCFDR.Y                             |
| 592 - 597   | 828.3966  | 827.3893  | 827.3272  | 75.0 | 0 | R.YCNDGK.S                            |

Spot No.: **77**

NCBI accession No.: **gi/342872804**

Plant species: ***Fusarium oxysporum Fo5176***

Protein name: **Phospholipase B**

Mascot score: **253**

Sequence coverage %: **8**

The number of matched peptides with  $p \leq 0.05$ : **4**

Calculated Mr: **70452**

Calculated Pi: **4.67**

### Annotated MS spectra:

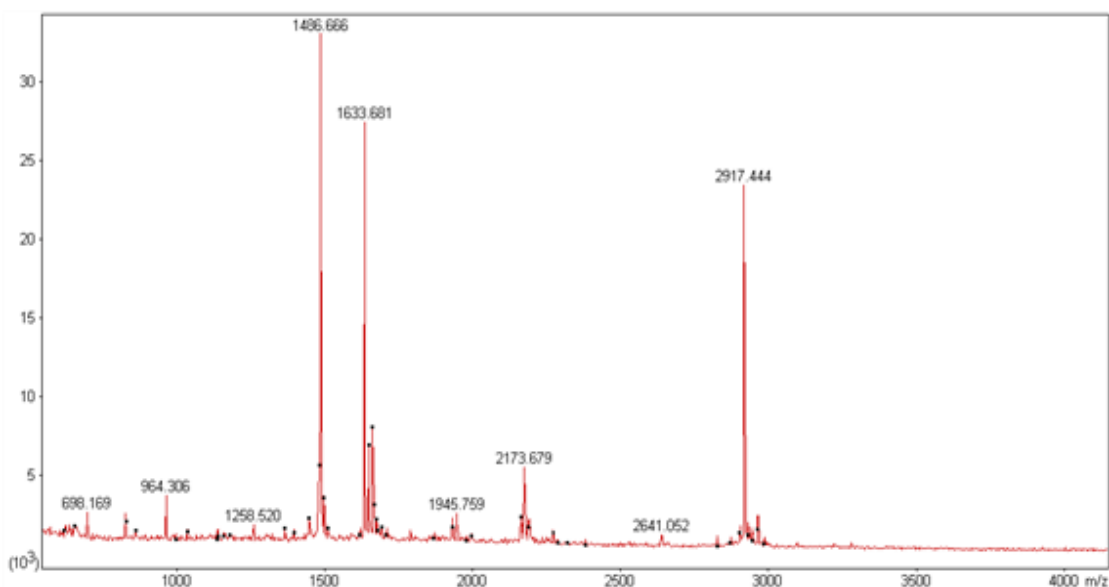

### Probability Based Mowse Score:

Ions score is  $-10 \cdot \log(P)$ , where  $P$  is the probability that the observed match is a random event. Individual ions scores  $> 47$  indicate identity or extensive homology ( $p < 0.05$ ). Protein scores are derived from ions scores as a non-probabilistic basis for ranking protein hits.

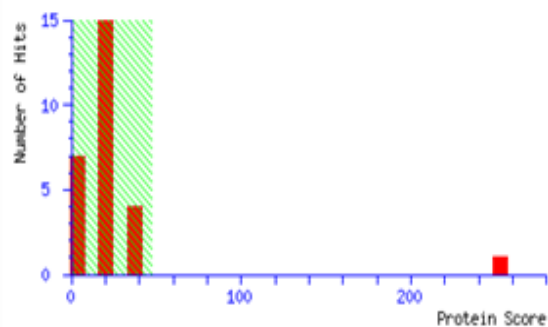

Matched peptide sequences: shown in **Bold Red**

```

1  MLGFVALTLW  LSTAIAAPDD  TALIPRVNSV  EIRALPNSPS  GGYAPKVVDG
51  PSTRPKVRLA  DELSSEEEAW  VRRRRNNTID  DLKTFLSRAN  ISGFDAESFV
101 EKHKNNATGL  PNIAIAASGG  GYRALMNGAG  FLSAADSRNN  KTGPIISGLLQ
151 SATYLAGLSG  GGWLVGSIFA  NNFSTVVDLQ  SGEKVWRFDR  SIFKGPKSSG
201 ISLLNTAEYW  TEMKDAVDDK  DKGWNTTLLD  YWGRALSYQL  VNAPEGGPSY
251 TFSSIADTSN  FKDADTFPFI  LVADGRAPGE  RVISLNATVY  EFNPYEFGTW
301 DPTTFGFVPT  EYLASNFTNG  SISSKGECVR  GFDQIGFVMG  TSSSLFNQFL
351 LNNITKVGKE  NDIPDIVVKA  IEGVLVGLDQ  DEDIAQYTP  NPFFGWNPTD
401 KSVNSKDHQL  TLVDGGEDLQ  NIPLHPLIQP  VRGVDIIFAI  DSSADTNNNW
451 PNGTALRATY  DRVGSSIGNG  TQFPSVPSAE  TfvNEKLNQR  PTLFGCDANN
501 FTLSDGEVPP  PLIFYIPNAP  YTYHSNVSTF  DMSYTTAERD  NIILNALNGA
551 TQGNATIDKE  WPTCVACAVM  SRSWWKANET  VPDACKTCFD  RYCWDGKSNN
601 TAVKSYEPEY  IIGNATADA  ADNAAGARLG  PSWFVSAGVG  AAALFALM

```

### Matched peptides information:

| Query     | Start - End | Observed  | Mr (expt) | Mr (calc) | ppm   | H | Score | Expect  | Rank | Q | Peptide                       |
|-----------|-------------|-----------|-----------|-----------|-------|---|-------|---------|------|---|-------------------------------|
| <i>h1</i> | 59 - 73     | 1633.6810 | 1632.6737 | 1632.7631 | -54.7 | 0 | 91    | 2.6e-06 | 1    | 0 | R.LADELSSEEEAWK.R             |
| <i>h2</i> | 263 - 276   | 1486.6660 | 1485.6587 | 1485.7464 | -59.0 | 0 | 102   | 2.1e-07 | 1    | 0 | R.DADTFPFIYVADGR.A            |
| <i>h3</i> | 263 - 276   | 1486.6660 | 1485.6587 | 1485.7464 | -59.0 | 0 | 102   | 2.1e-07 | 1    | 0 | R.DADTFPFIYVADGR.A            |
| <i>h4</i> | 407 - 432   | 2917.4441 | 2916.4368 | 2916.5458 | -37.4 | 0 | 59    | 0.0021  | 1    | 0 | R.DHQLTLVDGGEDLQIIFLHPLIQPK.G |

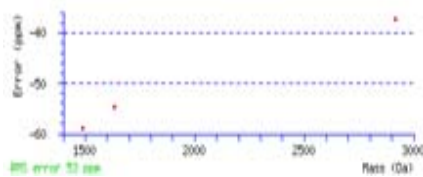

## Annotated ion spectra of the matched peptides with $p \leq 0.05$ :

CID No.: **77-1486.6**

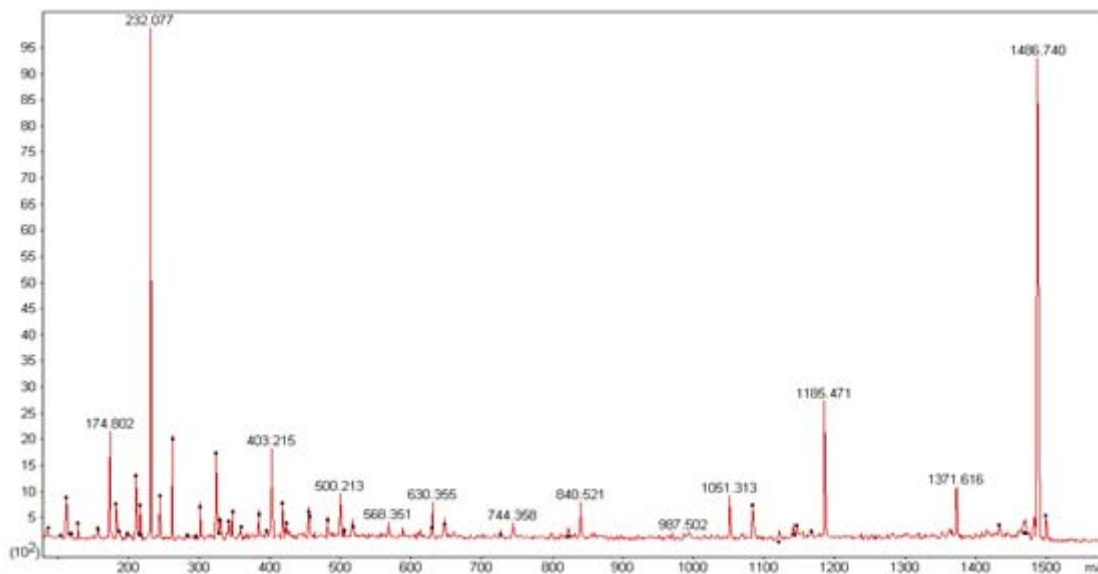

MS/MS Fragmentation of **K.DADTPFPILVADGR.A**

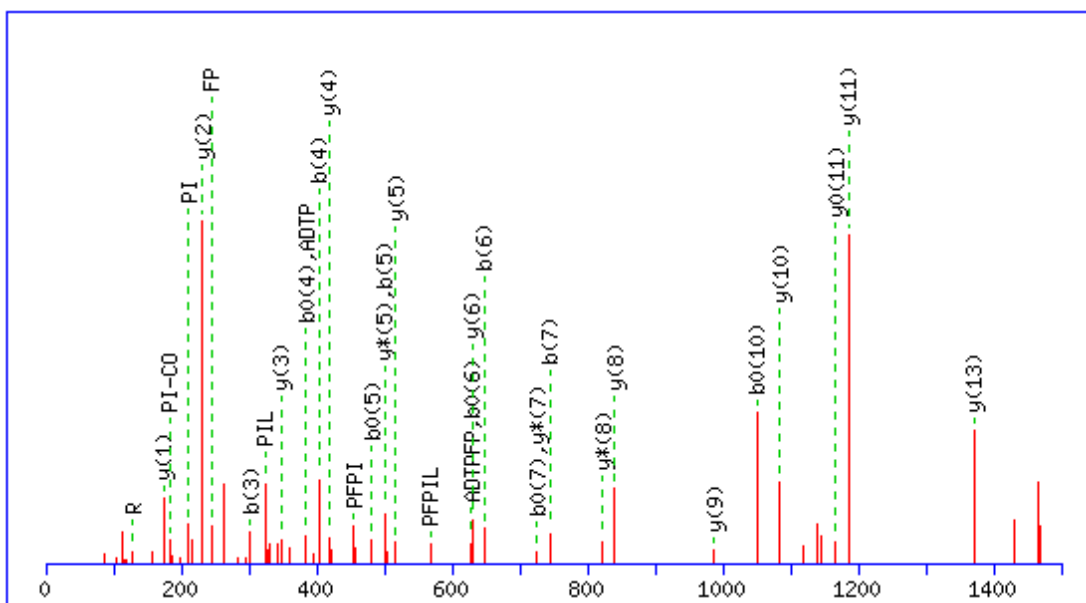

Monoisotopic mass of neutral peptide  $M_r(\text{calc})$ : 1485.7464

| #  | Immon.   | a         | a <sup>0</sup> | b         | b <sup>0</sup> | d         | d'       | Seq. | v         | w         | w'        | y         | y*        | y <sup>0</sup> | #  |
|----|----------|-----------|----------------|-----------|----------------|-----------|----------|------|-----------|-----------|-----------|-----------|-----------|----------------|----|
| 1  | 88.0393  | 88.0393   | 70.0287        | 116.0342  | 98.0237        | 44.0495   |          | D    |           |           |           |           |           |                | 14 |
| 2  | 44.0495  | 159.0764  | 141.0659       | 187.0713  | 169.0608       |           |          | A    | 1355.6954 |           |           | 1371.7267 | 1354.7001 | 1353.7161      | 13 |
| 3  | 88.0393  | 274.1034  | 256.0928       | 302.0983  | 284.0877       | 230.1135  |          | D    | 1240.6685 | 1239.6732 |           | 1300.6896 | 1283.6630 | 1282.6790      | 12 |
| 4  | 74.0600  | 375.1510  | 357.1405       | 403.1460  | 385.1354       | 359.1561  | 361.1354 | T    | 1139.6208 | 1152.6412 | 1154.6204 | 1185.6626 | 1168.6361 | 1167.6521      | 11 |
| 5  | 70.0651  | 472.2038  | 454.1932       | 500.1987  | 482.1882       | 446.1882  |          | P    | 1042.5680 | 1041.5728 |           | 1084.6150 | 1067.5884 | 1066.6044      | 10 |
| 6  | 120.0808 | 619.2722  | 601.2617       | 647.2671  | 629.2566       |           |          | F    | 895.4996  |           |           | 987.5622  | 970.5356  | 969.5516       | 9  |
| 7  | 70.0651  | 716.3250  | 698.3144       | 744.3199  | 726.3093       | 690.3093  |          | P    | 798.4468  | 797.4516  |           | 840.4938  | 823.4672  | 822.4832       | 8  |
| 8  | 86.0964  | 829.4090  | 811.3985       | 857.4040  | 839.3934       | 801.3777  | 815.3934 | I    | 685.3628  | 698.3832  | 712.3988  | 743.4410  | 726.4145  | 725.4305       | 7  |
| 9  | 86.0964  | 942.4931  | 924.4825       | 970.4880  | 952.4775       | 900.4462  |          | L    | 572.2787  | 571.2835  |           | 630.3570  | 613.3304  | 612.3464       | 6  |
| 10 | 72.0808  | 1041.5615 | 1023.5510      | 1069.5564 | 1051.5459      | 1027.5459 |          | V    | 473.2103  | 486.2307  |           | 517.2729  | 500.2463  | 499.2623       | 5  |
| 11 | 44.0495  | 1112.5986 | 1094.5881      | 1140.5936 | 1122.5830      |           |          | A    | 402.1732  |           |           | 418.2045  | 401.1779  | 400.1939       | 4  |
| 12 | 88.0393  | 1227.6256 | 1209.6150      | 1255.6205 | 1237.6099      | 1183.6358 |          | D    | 287.1462  | 286.1510  |           | 347.1674  | 330.1408  | 329.1568       | 3  |
| 13 | 30.0338  | 1284.6470 | 1266.6365      | 1312.6420 | 1294.6314      |           |          | G    |           |           |           | 232.1404  | 215.1139  |                | 2  |
| 14 | 129.1135 |           |                |           |                |           |          | R    | 74.0237   | 73.0284   |           | 175.1190  | 158.0924  |                | 1  |

| Seq            | ya       | yb              | Seq            | ya              | yb              | Seq           | ya       | yb              |
|----------------|----------|-----------------|----------------|-----------------|-----------------|---------------|----------|-----------------|
| <b>AD</b>      | 159.0764 | 187.0713        | <b>ADT</b>     | 260.1241        | 288.1190        | <b>ADTP</b>   | 357.1769 | <b>385.1718</b> |
| <b>ADTPF</b>   | 504.2453 | 532.2402        | <b>ADTPFP</b>  | 601.2980        | <b>629.2930</b> | <b>DT</b>     | 189.0870 | 217.0819        |
| <b>DTP</b>     | 286.1397 | 314.1347        | <b>DTPF</b>    | 433.2082        | 461.2031        | <b>DTPFP</b>  | 530.2609 | 558.2558        |
| <b>DTPFPI</b>  | 643.3450 | 671.3399        | <b>TP</b>      | 171.1128        | 199.1077        | <b>TPF</b>    | 318.1812 | 346.1761        |
| <b>TPFP</b>    | 415.2340 | 443.2289        | <b>TPFPI</b>   | 528.3180        | 556.3130        | <b>TPFPIL</b> | 641.4021 | 669.3970        |
| <b>PF</b>      | 217.1335 | <b>245.1285</b> | <b>PFP</b>     | 314.1863        | 342.1812        | <b>PFPI</b>   | 427.2704 | <b>455.2653</b> |
| <b>PFPIIL</b>  | 540.3544 | <b>568.3493</b> | <b>PFPIILV</b> | 639.4228        | 667.4178        | <b>FP</b>     | 217.1335 | <b>245.1285</b> |
| <b>FPI</b>     | 330.2176 | 358.2125        | <b>FPIL</b>    | 443.3017        | 471.2966        | <b>FPILV</b>  | 542.3701 | 570.3650        |
| <b>FPILVA</b>  | 613.4072 | 641.4021        | <b>PI</b>      | <b>183.1492</b> | <b>211.1441</b> | <b>PIL</b>    | 296.2333 | <b>324.2282</b> |
| <b>PILV</b>    | 395.3017 | 423.2966        | <b>PILVA</b>   | 466.3388        | 494.3337        | <b>PILVAD</b> | 581.3657 | 609.3606        |
| <b>PILVADG</b> | 638.3872 | 666.3821        | <b>IL</b>      | 199.1805        | 227.1754        | <b>ILV</b>    | 298.2489 | 326.2438        |
| <b>ILVA</b>    | 369.2860 | 397.2809        | <b>ILVAD</b>   | 484.3130        | 512.3079        | <b>ILVADG</b> | 541.3344 | 569.3293        |
| <b>LV</b>      | 185.1648 | 213.1598        | <b>LVA</b>     | 256.2020        | 284.1969        | <b>LVAD</b>   | 371.2289 | 399.2238        |
| <b>LVADG</b>   | 428.2504 | 456.2453        | <b>VA</b>      | 143.1179        | 171.1128        | <b>VAD</b>    | 258.1448 | 286.1397        |
| <b>VADG</b>    | 315.1663 | 343.1612        | <b>AD</b>      | 159.0764        | 187.0713        | <b>ADG</b>    | 216.0979 | 244.0928        |
| <b>DG</b>      | 145.0608 | 173.0557        |                |                 |                 |               |          |                 |

## Annotated ion spectra of the matched peptides with $p \leq 0.05$ :

CID No.: **77-1633.6**

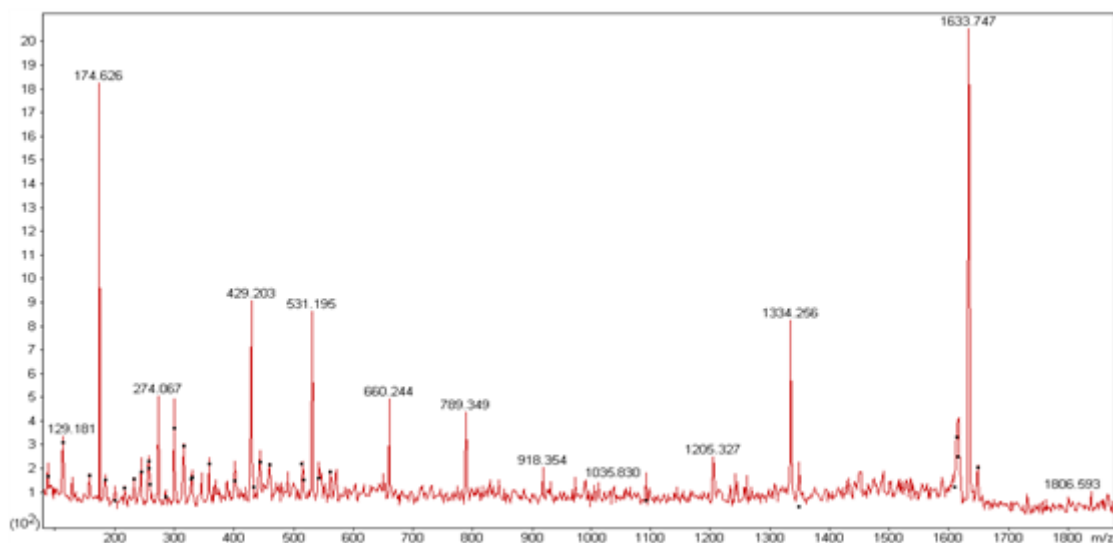

MS/MS Fragmentation of **R.LADELSSEEAWVR.R**

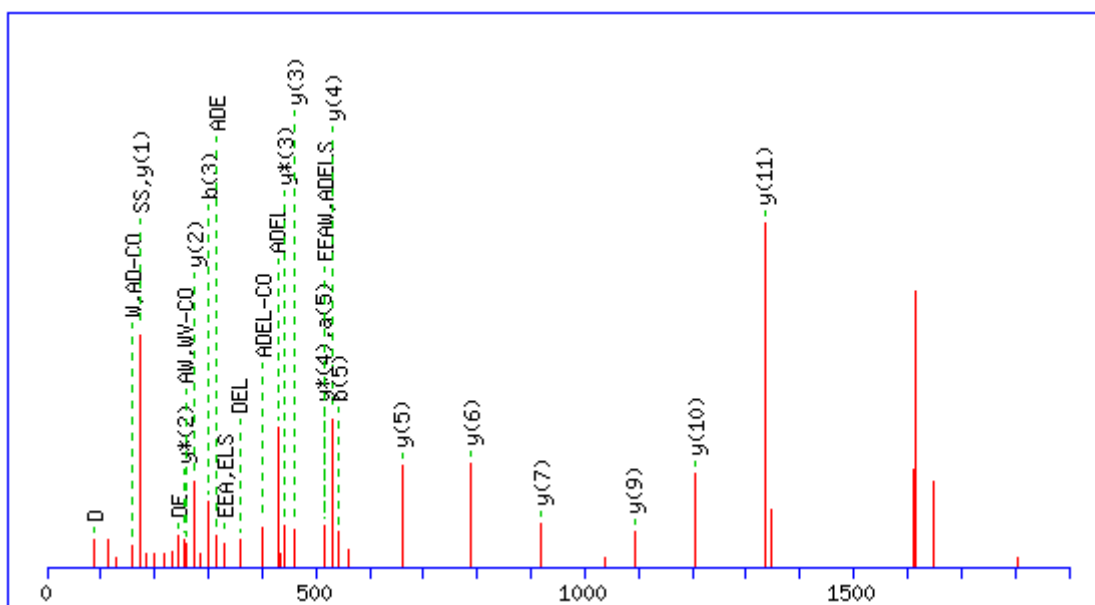

Monoisotopic mass of neutral peptide  $M_r(\text{calc})$ : 1632.7631

| #  | Immon.   | a         | a <sup>0</sup> | b         | b <sup>0</sup> | d         | Seq. | v         | w         | y         | y <sup>*</sup> | y <sup>0</sup> | #  |
|----|----------|-----------|----------------|-----------|----------------|-----------|------|-----------|-----------|-----------|----------------|----------------|----|
| 1  | 86.0964  | 86.0964   |                | 114.0913  |                | 44.0495   | L    |           |           |           |                |                | 14 |
| 2  | 44.0495  | 157.1335  |                | 185.1285  |                |           | A    | 1504.6550 |           | 1520.6863 | 1503.6598      | 1502.6758      | 13 |
| 3  | 88.0393  | 272.1605  | 254.1499       | 300.1554  | 282.1448       | 228.1707  | D    | 1389.6281 | 1388.6329 | 1449.6492 | 1432.6227      | 1431.6387      | 12 |
| 4  | 102.0550 | 401.2031  | 383.1925       | 429.1980  | 411.1874       | 343.1976  | E    | 1260.5855 | 1259.5903 | 1334.6223 | 1317.5957      | 1316.6117      | 11 |
| 5  | 86.0964  | 514.2871  | 496.2766       | 542.2821  | 524.2715       | 472.2402  | L    | 1147.5014 | 1146.5062 | 1205.5797 | 1188.5531      | 1187.5691      | 10 |
| 6  | 60.0444  | 601.3192  | 583.3086       | 629.3141  | 611.3035       | 585.3243  | S    | 1060.4694 | 1059.4742 | 1092.4956 | 1075.4691      | 1074.4851      | 9  |
| 7  | 60.0444  | 688.3512  | 670.3406       | 716.3461  | 698.3355       | 672.3563  | S    | 973.4374  | 972.4421  | 1005.4636 | 988.4371       | 987.4530       | 8  |
| 8  | 102.0550 | 817.3938  | 799.3832       | 845.3887  | 827.3781       | 759.3883  | E    | 844.3948  | 843.3995  | 918.4316  | 901.4050       | 900.4210       | 7  |
| 9  | 102.0550 | 946.4364  | 928.4258       | 974.4313  | 956.4207       | 888.4309  | E    | 715.3522  | 714.3570  | 789.3890  | 772.3624       | 771.3784       | 6  |
| 10 | 102.0550 | 1075.4790 | 1057.4684      | 1103.4739 | 1085.4633      | 1017.4735 | E    | 586.3096  | 585.3144  | 660.3464  | 643.3198       | 642.3358       | 5  |
| 11 | 44.0495  | 1146.5161 | 1128.5055      | 1174.5110 | 1156.5004      |           | A    | 515.2725  |           | 531.3038  | 514.2772       |                | 4  |
| 12 | 159.0917 | 1332.5954 | 1314.5848      | 1360.5903 | 1342.5798      |           | W    | 329.1932  |           | 460.2667  | 443.2401       |                | 3  |
| 13 | 72.0808  | 1431.6638 | 1413.6533      | 1459.6587 | 1441.6482      | 1417.6482 | V    | 230.1248  | 243.1452  | 274.1874  | 257.1608       |                | 2  |
| 14 | 129.1135 |           |                |           |                |           | R    | 74.0237   | 73.0284   | 175.1190  | 158.0924       |                | 1  |



| Seq    | ya       | yb       | Seq    | ya       | yb       | Seq    | ya       | yb       |
|--------|----------|----------|--------|----------|----------|--------|----------|----------|
| AD     | 159.0764 | 187.0713 | ADE    | 288.1190 | 316.1139 | ADEL   | 401.2031 | 429.1980 |
| ADELS  | 488.2351 | 516.2300 | ADELSS | 575.2671 | 603.2620 | DE     | 217.0819 | 245.0768 |
| DEL    | 330.1660 | 358.1609 | DELS   | 417.1980 | 445.1929 | DELSS  | 504.2300 | 532.2249 |
| DELSSE | 633.2726 | 661.2675 | EL     | 215.1390 | 243.1339 | ELS    | 302.1710 | 330.1660 |
| ELSS   | 389.2031 | 417.1980 | ELSSE  | 518.2457 | 546.2406 | ELSSEE | 647.2883 | 675.2832 |
| LS     | 173.1285 | 201.1234 | LSS    | 260.1605 | 288.1554 | LSSE   | 389.2031 | 417.1980 |
| LSSEE  | 518.2457 | 546.2406 | LSSEEE | 647.2883 | 675.2832 | SS     | 147.0764 | 175.0713 |
| SSE    | 276.1190 | 304.1139 | SSEE   | 405.1616 | 433.1565 | SSEEE  | 534.2042 | 562.1991 |
| SSEEEA | 605.2413 | 633.2362 | SE     | 189.0870 | 217.0819 | SEE    | 318.1296 | 346.1245 |
| SEEE   | 447.1722 | 475.1671 | SEEEA  | 518.2093 | 546.2042 | EE     | 231.0975 | 259.0925 |
| EEE    | 360.1401 | 388.1351 | EEEA   | 431.1773 | 459.1722 | EEEAW  | 617.2566 | 645.2515 |
| EE     | 231.0975 | 259.0925 | EEA    | 302.1347 | 330.1296 | EEAW   | 488.2140 | 516.2089 |
| EEAWV  | 587.2824 | 615.2773 | EA     | 173.0921 | 201.0870 | EAW    | 359.1714 | 387.1663 |
| EAWV   | 458.2398 | 486.2347 | AW     | 230.1288 | 258.1237 | AWV    | 329.1972 | 357.1921 |
| WV     | 258.1601 | 286.1550 |        |          |          |        |          |          |

Annotated ion spectra of the matched peptides with  $p \leq 0.05$ :

CID No.: **77-2917.4**

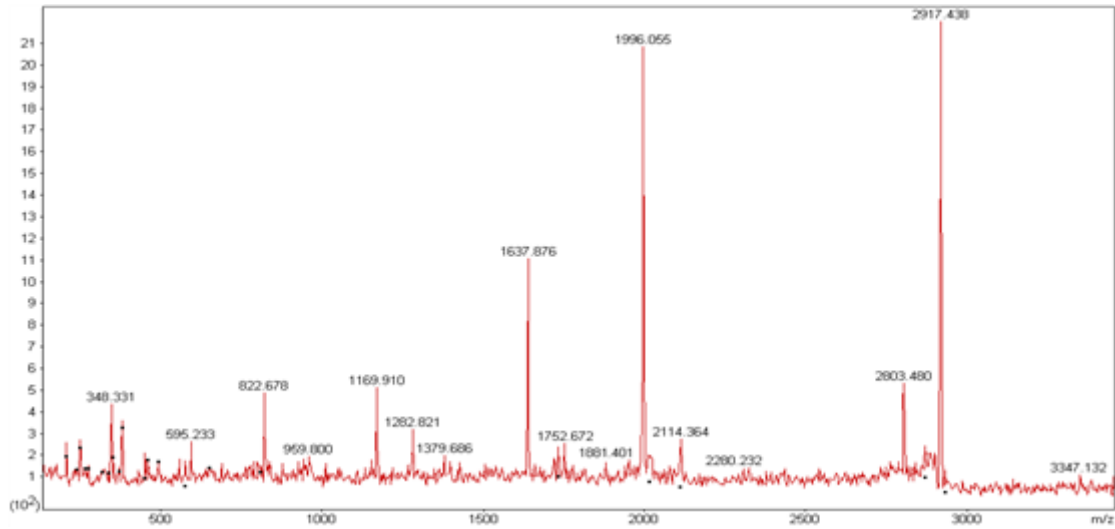

MS/MS Fragmentation of **K.DHQLTLVDGGEDLQNIPLHPLIQPVR.G**

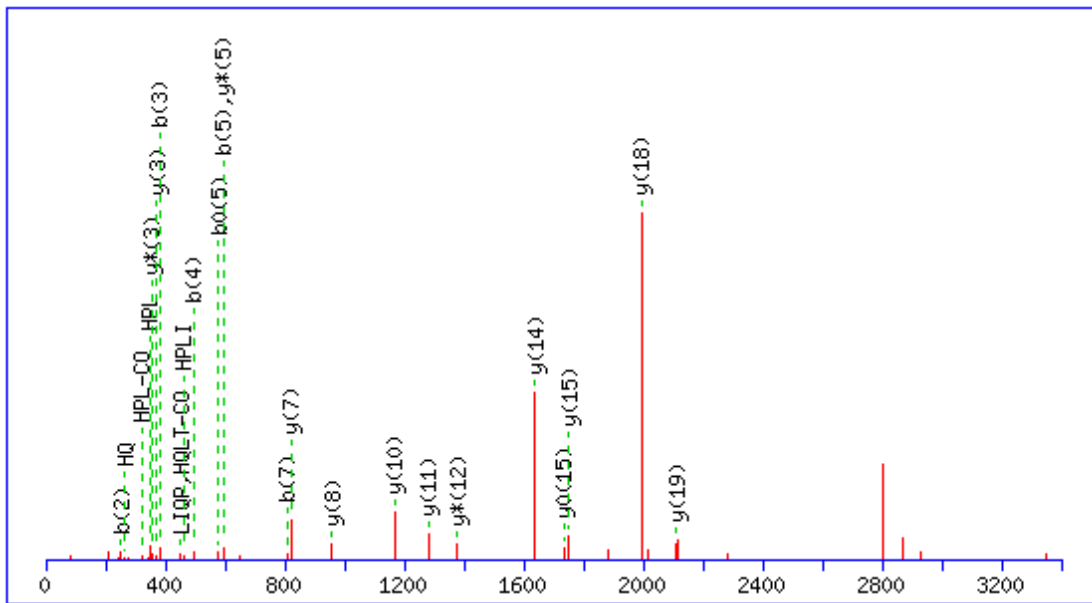

Monoisotopic mass of neutral peptide  $M_r(\text{calc})$ : 1485.7464

| #  | Immon.   | a         | a*        | a <sup>0</sup> | b         | b*        | b <sup>0</sup> | d         | d'        | Seq. | v         | w         | w'        | y         | y*        | y <sup>0</sup> | #  |
|----|----------|-----------|-----------|----------------|-----------|-----------|----------------|-----------|-----------|------|-----------|-----------|-----------|-----------|-----------|----------------|----|
| 1  | 88.0393  | 88.0393   |           | 70.0287        | 116.0342  |           | 98.0237        | 44.0495   |           | D    |           |           |           |           |           |                | 26 |
| 2  | 110.0713 | 225.0982  |           | 207.0877       | 253.0931  |           | 235.0826       |           |           | H    | 2720.4730 |           |           | 2802.5261 | 2785.4995 | 2784.5155      | 25 |
| 3  | 101.0709 | 353.1568  | 336.1302  | 335.1462       | 381.1517  | 364.1252  | 363.1411       | 296.1353  |           | Q    | 2592.4144 | 2591.4192 |           | 2665.4672 | 2648.4406 | 2647.4566      | 24 |
| 4  | 86.0964  | 466.2409  | 449.2143  | 448.2303       | 494.2358  | 477.2092  | 476.2252       | 424.1939  |           | L    | 2479.3304 | 2478.3351 |           | 2537.4086 | 2520.3821 | 2519.3980      | 23 |
| 5  | 74.0600  | 567.2885  | 550.2620  | 549.2780       | 595.2835  | 578.2569  | 577.2729       | 551.2936  | 553.2729  | T    | 2378.2827 | 2391.3031 | 2393.2823 | 2424.3245 | 2407.2980 | 2406.3140      | 22 |
| 6  | 86.0964  | 680.3726  | 663.3461  | 662.3620       | 708.3675  | 691.3410  | 690.3570       | 638.3257  |           | L    | 2265.1986 | 2264.2034 |           | 2323.2769 | 2306.2503 | 2305.2663      | 21 |
| 7  | 72.0808  | 779.4410  | 762.4145  | 761.4304       | 807.4359  | 790.4094  | 789.4254       | 765.4254  |           | V    | 2166.1302 | 2179.1506 |           | 2210.1928 | 2193.1662 | 2192.1822      | 20 |
| 8  | 88.0393  | 894.4680  | 877.4414  | 876.4574       | 922.4629  | 905.4363  | 904.4523       | 850.4781  |           | D    | 2051.1033 | 2050.1080 |           | 2111.1244 | 2094.0978 | 2093.1138      | 19 |
| 9  | 30.0338  | 951.4894  | 934.4629  | 933.4789       | 979.4843  | 962.4578  | 961.4738       |           |           | G    |           |           |           | 1996.0974 | 1979.0709 | 1978.0869      | 18 |
| 10 | 30.0338  | 1008.5109 | 991.4843  | 990.5003       | 1036.5058 | 1019.4793 | 1018.4952      |           |           | G    |           |           |           | 1939.0760 | 1922.0494 | 1921.0654      | 17 |
| 11 | 102.0550 | 1137.5535 | 1120.5269 | 1119.5429      | 1165.5484 | 1148.5218 | 1147.5378      | 1079.5480 |           | E    | 1808.0177 | 1807.0225 |           | 1882.0545 | 1865.0280 | 1864.0439      | 16 |
| 12 | 88.0393  | 1252.5804 | 1235.5539 | 1234.5699      | 1280.5753 | 1263.5488 | 1262.5648      | 1208.5906 |           | D    | 1692.9908 | 1691.9955 |           | 1753.0119 | 1735.9854 | 1735.0014      | 15 |
| 13 | 86.0964  | 1365.6645 | 1348.6379 | 1347.6539      | 1393.6594 | 1376.6329 | 1375.6488      | 1323.6175 |           | L    | 1579.9067 | 1578.9115 |           | 1637.9850 | 1620.9584 |                | 14 |
| 14 | 101.0709 | 1493.7231 | 1476.6965 | 1475.7125      | 1521.7180 | 1504.6914 | 1503.7074      | 1436.7016 |           | Q    | 1451.8481 | 1450.8529 |           | 1524.9009 | 1507.8744 |                | 13 |
| 15 | 87.0553  | 1607.7660 | 1590.7394 | 1589.7554      | 1635.7609 | 1618.7344 | 1617.7503      | 1564.7602 |           | N    | 1337.8052 | 1336.8100 |           | 1396.8423 | 1379.8158 |                | 12 |
| 16 | 86.0964  | 1720.8501 | 1703.8235 | 1702.8395      | 1748.8450 | 1731.8184 | 1730.8344      | 1692.8188 | 1706.8344 | I    | 1224.7212 | 1237.7416 | 1251.7572 | 1282.7994 | 1265.7729 |                | 11 |

|    |          |           |           |           |           |           |           |           |           |   |           |           |          |           |           |  |    |
|----|----------|-----------|-----------|-----------|-----------|-----------|-----------|-----------|-----------|---|-----------|-----------|----------|-----------|-----------|--|----|
| 17 | 70.0651  | 1817.9028 | 1800.8763 | 1799.8923 | 1845.8977 | 1828.8712 | 1827.8872 | 1791.8872 |           | P | 1127.6684 | 1126.6731 |          | 1169.7153 | 1152.6888 |  | 10 |
| 18 | 86.0964  | 1930.9869 | 1913.9603 | 1912.9763 | 1958.9818 | 1941.9552 | 1940.9712 | 1888.9399 |           | L | 1014.5843 | 1013.5891 |          | 1072.6626 | 1055.6360 |  | 9  |
| 19 | 110.0713 | 2068.0458 | 2051.0192 | 2050.0352 | 2096.0407 | 2079.0142 | 2078.0301 |           |           | H | 877.5254  |           |          | 959.5785  | 942.5520  |  | 8  |
| 20 | 70.0651  | 2165.0986 | 2148.0720 | 2147.0880 | 2193.0935 | 2176.0669 | 2175.0829 | 2139.0829 |           | P | 780.4727  | 779.4774  |          | 822.5196  | 805.4931  |  | 7  |
| 21 | 86.0964  | 2278.1826 | 2261.1561 | 2260.1721 | 2306.1775 | 2289.1510 | 2288.1670 | 2236.1357 |           | L | 667.3886  | 666.3933  |          | 725.4668  | 708.4403  |  | 6  |
| 22 | 86.0964  | 2391.2667 | 2374.2401 | 2373.2561 | 2419.2616 | 2402.2351 | 2401.2510 | 2363.2354 | 2377.2510 | I | 554.3045  | 567.3249  | 581.3406 | 612.3828  | 595.3562  |  | 5  |
| 23 | 101.0709 | 2519.3253 | 2502.2987 | 2501.3147 | 2547.3202 | 2530.2936 | 2529.3096 | 2462.3038 |           | Q | 426.2459  | 425.2507  |          | 499.2987  | 482.2722  |  | 4  |
| 24 | 70.0651  | 2616.3780 | 2599.3515 | 2598.3675 | 2644.3729 | 2627.3464 | 2626.3624 | 2590.3624 |           | P | 329.1932  | 328.1979  |          | 371.2401  | 354.2136  |  | 3  |
| 25 | 72.0808  | 2715.4464 | 2698.4199 | 2697.4359 | 2743.4414 | 2726.4148 | 2725.4308 | 2701.4308 |           | V | 230.1248  | 243.1452  |          | 274.1874  | 257.1608  |  | 2  |
| 26 | 129.1135 |           |           |           |           |           |           |           |           | R | 74.0237   | 73.0284   |          | 175.1190  | 158.0924  |  | 1  |

| Seq    | ya       | yb       | Seq     | ya       | yb       | Seq    | ya       | yb       |
|--------|----------|----------|---------|----------|----------|--------|----------|----------|
| HQ     | 238.1299 | 266.1248 | HQL     | 351.2139 | 379.2088 | HQLT   | 452.2616 | 480.2565 |
| HQLTL  | 565.3457 | 593.3406 | HQLTLV  | 664.4141 | 692.4090 | QL     | 214.1550 | 242.1499 |
| QLT    | 315.2027 | 343.1976 | QLTL    | 428.2867 | 456.2817 | QLTLV  | 527.3552 | 555.3501 |
| QLTLVD | 642.3821 | 670.3770 | QLTLVDG | 699.4036 | 727.3985 | LT     | 187.1441 | 215.1390 |
| LTL    | 300.2282 | 328.2231 | LTLV    | 399.2966 | 427.2915 | LTLVD  | 514.3235 | 542.3184 |
| LTLVDG | 571.3450 | 599.3399 | LTLVDGG | 628.3665 | 656.3614 | TL     | 187.1441 | 215.1390 |
| TLV    | 286.2125 | 314.2074 | TLVD    | 401.2395 | 429.2344 | TLVDG  | 458.2609 | 486.2558 |
| TLVDGG | 515.2824 | 543.2773 | TLVDGGE | 644.3250 | 672.3199 | LV     | 185.1648 | 213.1598 |
| LVD    | 300.1918 | 328.1867 | LVDG    | 357.2132 | 385.2082 | LVDGG  | 414.2347 | 442.2296 |
| LVDGGE | 543.2773 | 571.2722 | LVDGGED | 658.3042 | 686.2992 | VD     | 187.1077 | 215.1026 |
| VDG    | 244.1292 | 272.1241 | VDGG    | 301.1506 | 329.1456 | VDGGE  | 430.1932 | 458.1882 |
| VDGGED | 545.2202 | 573.2151 | VDGGEDL | 658.3042 | 686.2992 | DG     | 145.0608 | 173.0557 |
| DGG    | 202.0822 | 230.0771 | DGGE    | 331.1248 | 359.1197 | DGGED  | 446.1518 | 474.1467 |
| DGGEDL | 559.2358 | 587.2307 | DGGEDLQ | 687.2944 | 715.2893 | GG     | 87.0553  | 115.0502 |
| GGE    | 216.0979 | 244.0928 | GGED    | 331.1248 | 359.1197 | GGEDL  | 444.2089 | 472.2038 |
| GGEDLQ | 572.2675 | 600.2624 | GGEDLQN | 686.3104 | 714.3053 | GE     | 159.0764 | 187.0713 |
| GED    | 274.1034 | 302.0983 | GEDL    | 387.1874 | 415.1823 | GEDLQ  | 515.2460 | 543.2409 |
| GEDLQN | 629.2889 | 657.2838 | ED      | 217.0819 | 245.0768 | EDL    | 330.1660 | 358.1609 |
| EDLQ   | 458.2245 | 486.2195 | EDLQN   | 572.2675 | 600.2624 | EDLQNI | 685.3515 | 713.3464 |

|        |          |          |        |          |          |        |          |          |
|--------|----------|----------|--------|----------|----------|--------|----------|----------|
| DL     | 201.1234 | 229.1183 | DLQ    | 329.1819 | 357.1769 | DLQN   | 443.2249 | 471.2198 |
| DLQNI  | 556.3089 | 584.3039 | DLQNIP | 653.3617 | 681.3566 | LQ     | 214.1550 | 242.1499 |
| LQN    | 328.1979 | 356.1928 | LQNI   | 441.2820 | 469.2769 | LQNIP  | 538.3348 | 566.3297 |
| LQNIPL | 651.4188 | 679.4137 | QN     | 215.1139 | 243.1088 | QNI    | 328.1979 | 356.1928 |
| QNIPL  | 425.2507 | 453.2456 | QNIPL  | 538.3348 | 566.3297 | QNIPLH | 675.3937 | 703.3886 |
| NI     | 200.1394 | 228.1343 | NIP    | 297.1921 | 325.1870 | NIPL   | 410.2762 | 438.2711 |
| NIPLH  | 547.3351 | 575.3300 | NIPLHP | 644.3879 | 672.3828 | IP     | 183.1492 | 211.1441 |
| IPL    | 296.2333 | 324.2282 | IPLH   | 433.2922 | 461.2871 | IPLHP  | 530.3449 | 558.3398 |
| IPLHPL | 643.4290 | 671.4239 | PL     | 183.1492 | 211.1441 | PLH    | 320.2081 | 348.2030 |
| PLHP   | 417.2609 | 445.2558 | PLHPL  | 530.3449 | 558.3398 | PLHPLI | 643.4290 | 671.4239 |
| LH     | 223.1553 | 251.1503 | LHP    | 320.2081 | 348.2030 | LHPL   | 433.2922 | 461.2871 |
| LHPLI  | 546.3762 | 574.3711 | LHPLIQ | 674.4348 | 702.4297 | HP     | 207.1240 | 235.1190 |
| HPL    | 320.2081 | 348.2030 | HPLI   | 433.2922 | 461.2871 | HPLIQ  | 561.3507 | 589.3457 |
| HPLIQP | 658.4035 | 686.3984 | PL     | 183.1492 | 211.1441 | PLI    | 296.2333 | 324.2282 |
| PLIQ   | 424.2918 | 452.2867 | PLIQP  | 521.3446 | 549.3395 | PLIQPV | 620.4130 | 648.4079 |
| LI     | 199.1805 | 227.1754 | LIQ    | 327.2391 | 355.2340 | LIQP   | 424.2918 | 452.2867 |
| LIQPV  | 523.3602 | 551.3552 | IQ     | 214.1550 | 242.1499 | IQP    | 311.2078 | 339.2027 |
| IQPV   | 410.2762 | 438.2711 | QP     | 198.1237 | 226.1186 | QPV    | 297.1921 | 325.1870 |
| PV     | 169.1335 | 197.1285 |        |          |          |        |          |          |

Spot No.: **78**

NCBI accession No.: **gi/342872804**

Plant species: ***Fusarium oxysporum Fo5176***

Protein name: **Phospholipase B**

Mascot score: **80**

Sequence coverage %: **2**

The number of matched peptides with  $p \leq 0.05$ : **2**

Calculated Mr: **70452**

Calculated Pi: **4.67**

### Annotated MS spectra:

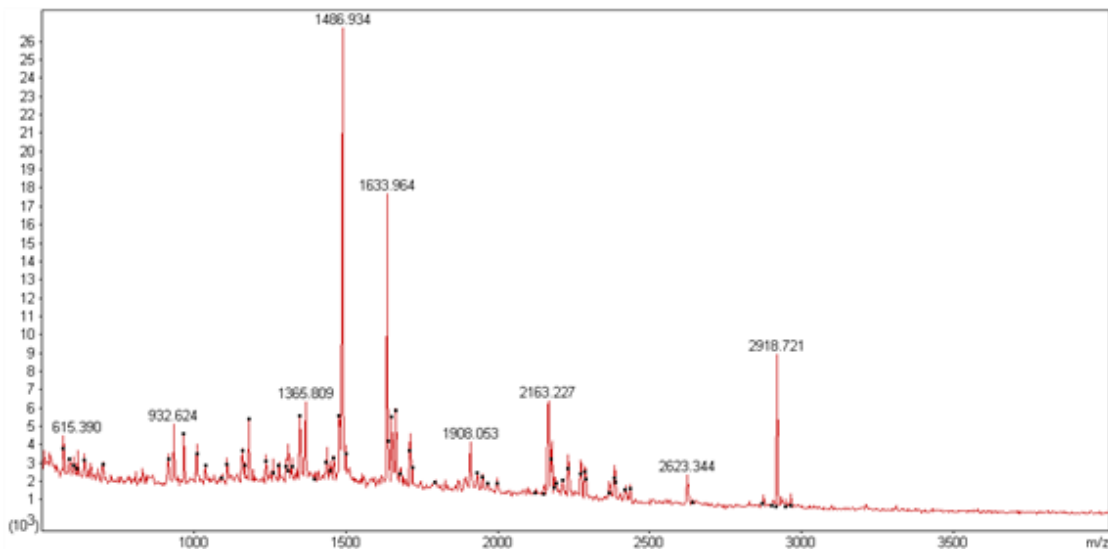

### Probability Based Mowse Score:

Ions score is  $-10 \cdot \log(P)$ , where  $P$  is the probability that the observed match is a random event. Individual ions scores  $> 48$  indicate identity or extensive homology ( $p < 0.05$ ). Protein scores are derived from ions scores as a non-probabilistic basis for ranking protein hits.

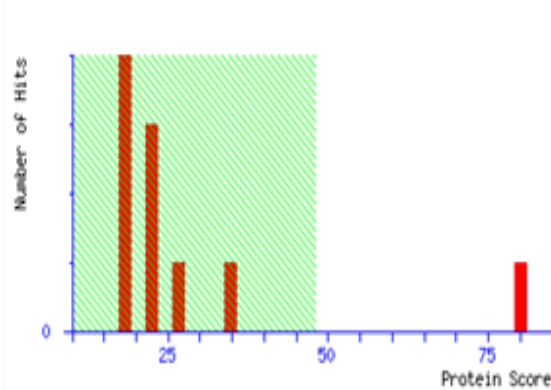

Matched peptide sequences: shown in **Bold Red**

```

1  MLGFVALLTW  LSTAIAAPDD  TALIPRVNSV  EIRALPNSPS  GGYAPKVVDC
51  PSTRPKVRLA  DELSSEEEAW  VRRRRNNTID  DLKTFLSRAN  ISGFDAESFV
101  EKHKNNATGL  PNIAIAASGG  GYRALMNGAG  FLSAADSRNN  KTGPIISGLLQ
151  SATYLAGLSG  GGWLVGSIFA  NNFSTVPDLQ  SGEKVWRFDR  SIFKGPSSG
201  ISLLNTAEYW  TEMKDAVDDK  DKGWNTTLD  YWGRALSYQL  VNAPEGGPSY
251  TFSSIADTSN  FKDADTFPPI  LVADGRAPGE  RVISLNATVY  EFNPYEFGTW
301  DPTTFGFVPT  EYLASNFTNG  SISSKGECVR  GFDQIGFVMG  TSSSLFNQFL
351  LNNITKVGKE  NDIPDIVVKA  IEGVLVGLDQ  DEDIAQYTP  NPPFGWNPTD
401  KSVNSKDHQL  TLVDGGEDLQ  NIPLHPLIQP  VRGVDIIFAI  DSSADTNNNW
451  PNGTALRATY  DRVGSSIGNG  TQFPSVPSAE  TTVNEKLNQR  PTLFGCDANN
501  FTLSDGEVPP  PLIFYIPNAP  YTYHSNVSTF  DMSYTTAERD  NIILNALNGA
551  TQGNATIDKE  WPTCVACAVM  SRSWWKANET  VPDACKTCFD  RYCWDGKSNN
601  TAVKSYEPEY  IIGGNATADA  ADNAAGARLG  PSWFVSAGVG  AAALFALM

```

### Matched peptides information:

| Query              | Start - End | Observed  | Mr (expt) | Mr (calc) | ppm | M | Score | Expect  | Rank | Q | Peptide            |
|--------------------|-------------|-----------|-----------|-----------|-----|---|-------|---------|------|---|--------------------|
| <a href="#">#1</a> | 263 - 276   | 1486.9340 | 1485.9267 | 1485.7464 | 121 | 0 | 60    | 3.4e-05 | 1    | 0 | K.DADTFPPILVADGR.A |
| <a href="#">#2</a> | 263 - 276   | 1486.9340 | 1485.9267 | 1485.7464 | 121 | 0 | 60    | 3.4e-05 | 1    | 0 | K.DADTFPPILVADGR.A |

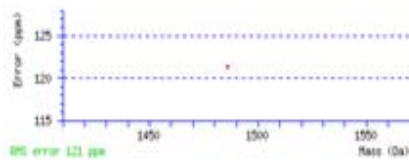

## Annotated ion spectra of the matched peptides with $p \leq 0.05$ :

CID No.: **78-1486.9**

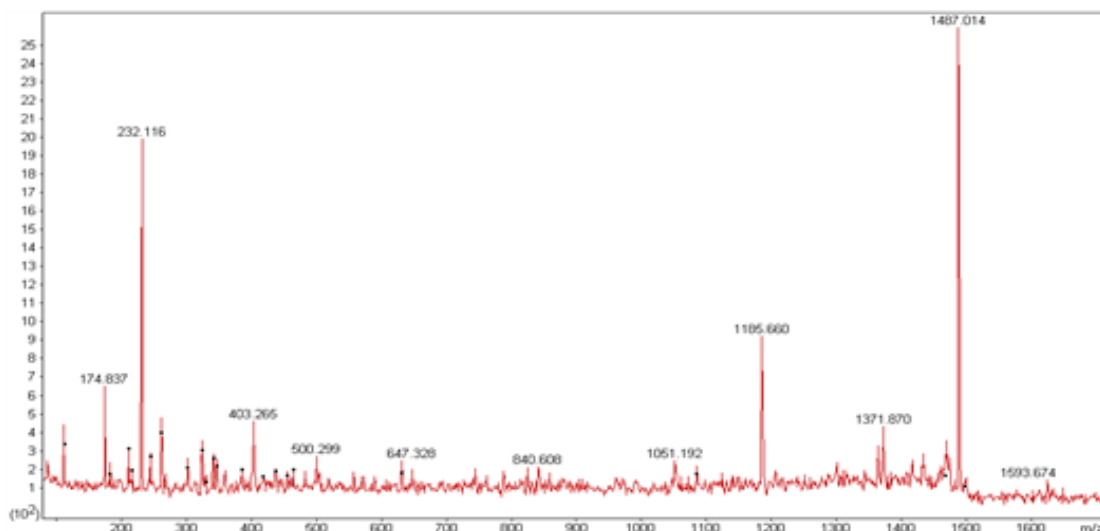

### MS/MS Fragmentation of **K.DADTFPILVADGR.A**

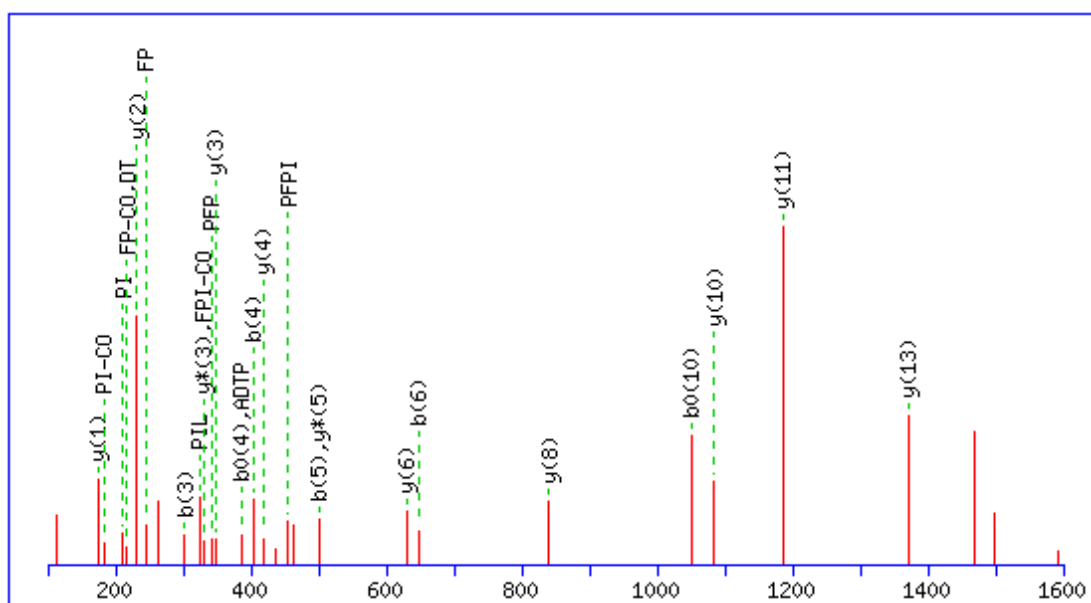

Monoisotopic mass of neutral peptide  $M_r(\text{calc})$ : 1485.7464

| #  | Immon.   | a         | a <sup>0</sup> | b         | b <sup>0</sup> | d         | d'       | Seq. | v         | w         | w'        | y         | y*        | y <sup>0</sup> | #  |
|----|----------|-----------|----------------|-----------|----------------|-----------|----------|------|-----------|-----------|-----------|-----------|-----------|----------------|----|
| 1  | 88.0393  | 88.0393   | 70.0287        | 116.0342  | 98.0237        | 44.0495   |          | D    |           |           |           |           |           |                | 14 |
| 2  | 44.0495  | 159.0764  | 141.0659       | 187.0713  | 169.0608       |           |          | A    | 1355.6954 |           |           | 1371.7267 | 1354.7001 | 1353.7161      | 13 |
| 3  | 88.0393  | 274.1034  | 256.0928       | 302.0983  | 284.0877       | 230.1135  |          | D    | 1240.6685 | 1239.6732 |           | 1300.6896 | 1283.6630 | 1282.6790      | 12 |
| 4  | 74.0600  | 375.1510  | 357.1405       | 403.1460  | 385.1354       | 359.1561  | 361.1354 | T    | 1139.6208 | 1152.6412 | 1154.6204 | 1185.6626 | 1168.6361 | 1167.6521      | 11 |
| 5  | 70.0651  | 472.2038  | 454.1932       | 500.1987  | 482.1882       | 446.1882  |          | P    | 1042.5680 | 1041.5728 |           | 1084.6150 | 1067.5884 | 1066.6044      | 10 |
| 6  | 120.0808 | 619.2722  | 601.2617       | 647.2671  | 629.2566       |           |          | F    | 895.4996  |           |           | 987.5622  | 970.5356  | 969.5516       | 9  |
| 7  | 70.0651  | 716.3250  | 698.3144       | 744.3199  | 726.3093       | 690.3093  |          | P    | 798.4468  | 797.4516  |           | 840.4938  | 823.4672  | 822.4832       | 8  |
| 8  | 86.0964  | 829.4090  | 811.3985       | 857.4040  | 839.3934       | 801.3777  | 815.3934 | I    | 685.3628  | 698.3832  | 712.3988  | 743.4410  | 726.4145  | 725.4305       | 7  |
| 9  | 86.0964  | 942.4931  | 924.4825       | 970.4880  | 952.4775       | 900.4462  |          | L    | 572.2787  | 571.2835  |           | 630.3570  | 613.3304  | 612.3464       | 6  |
| 10 | 72.0808  | 1041.5615 | 1023.5510      | 1069.5564 | 1051.5459      | 1027.5459 |          | V    | 473.2103  | 486.2307  |           | 517.2729  | 500.2463  | 499.2623       | 5  |
| 11 | 44.0495  | 1112.5986 | 1094.5881      | 1140.5936 | 1122.5830      |           |          | A    | 402.1732  |           |           | 418.2045  | 401.1779  | 400.1939       | 4  |
| 12 | 88.0393  | 1227.6256 | 1209.6150      | 1255.6205 | 1237.6099      | 1183.6358 |          | D    | 287.1462  | 286.1510  |           | 347.1674  | 330.1408  | 329.1568       | 3  |
| 13 | 30.0338  | 1284.6470 | 1266.6365      | 1312.6420 | 1294.6314      |           |          | G    |           |           |           | 232.1404  | 215.1139  |                | 2  |
| 14 | 129.1135 |           |                |           |                |           |          | R    | 74.0237   | 73.0284   |           | 175.1190  | 158.0924  |                | 1  |

| Seq            | ya              | yb              | Seq            | ya              | yb              | Seq           | ya              | yb              |
|----------------|-----------------|-----------------|----------------|-----------------|-----------------|---------------|-----------------|-----------------|
| <b>AD</b>      | 159.0764        | 187.0713        | <b>ADT</b>     | 260.1241        | 288.1190        | <b>ADTP</b>   | 357.1769        | <b>385.1718</b> |
| <b>ADTPF</b>   | 504.2453        | 532.2402        | <b>ADTPFP</b>  | 601.2980        | 629.2930        | <b>DT</b>     | 189.0870        | <b>217.0819</b> |
| <b>DTP</b>     | 286.1397        | 314.1347        | <b>DTPF</b>    | 433.2082        | 461.2031        | <b>DTPFP</b>  | 530.2609        | <b>558.2558</b> |
| <b>DTPFPI</b>  | 643.3450        | 671.3399        | <b>TP</b>      | 171.1128        | 199.1077        | <b>TPF</b>    | 318.1812        | 346.1761        |
| <b>TPFP</b>    | 415.2340        | 443.2289        | <b>TPFPI</b>   | 528.3180        | 556.3130        | <b>TPFPIL</b> | 641.4021        | 669.3970        |
| <b>PF</b>      | <b>217.1335</b> | <b>245.1285</b> | <b>PFP</b>     | 314.1863        | <b>342.1812</b> | <b>PFPI</b>   | 427.2704        | <b>455.2653</b> |
| <b>PFPIIL</b>  | 540.3544        | 568.3493        | <b>PFPIILV</b> | 639.4228        | 667.4178        | <b>FP</b>     | <b>217.1335</b> | <b>245.1285</b> |
| <b>FPI</b>     | <b>330.2176</b> | 358.2125        | <b>FPIL</b>    | 443.3017        | 471.2966        | <b>FPILV</b>  | 542.3701        | 570.3650        |
| <b>FPILVA</b>  | 613.4072        | 641.4021        | <b>PI</b>      | <b>183.1492</b> | <b>211.1441</b> | <b>PIL</b>    | 296.2333        | <b>324.2282</b> |
| <b>PILV</b>    | 395.3017        | 423.2966        | <b>PILVA</b>   | 466.3388        | 494.3337        | <b>PILVAD</b> | 581.3657        | 609.3606        |
| <b>PILVADG</b> | 638.3872        | 666.3821        | <b>IL</b>      | 199.1805        | 227.1754        | <b>ILV</b>    | 298.2489        | 326.2438        |
| <b>ILVA</b>    | 369.2860        | 397.2809        | <b>ILVAD</b>   | 484.3130        | 512.3079        | <b>ILVADG</b> | 541.3344        | 569.3293        |
| <b>LV</b>      | 185.1648        | 213.1598        | <b>LVA</b>     | 256.2020        | 284.1969        | <b>LVAD</b>   | 371.2289        | 399.2238        |
| <b>LVADG</b>   | 428.2504        | 456.2453        | <b>VA</b>      | 143.1179        | 171.1128        | <b>VAD</b>    | 258.1448        | 286.1397        |
| <b>VADG</b>    | 315.1663        | 343.1612        | <b>AD</b>      | 159.0764        | 187.0713        | <b>ADG</b>    | 216.0979        | 244.0928        |
| <b>DG</b>      | 145.0608        | 173.0557        |                |                 |                 |               |                 |                 |



Spot No.: **79**

Mascot score: **101**

Species: *Fusarium oxysporum f. sp. cubense race 4*

Protein name: **Chitinase 1**

NCBI accession No.: **gi| 475673339**

Sequence coverage %: **39**

Matched peptides No.: **18**

Total peptides No.: **55**

Calculated Mr: **47886**

Calculated pI: **6.31**

### Annotated PMF spectra:

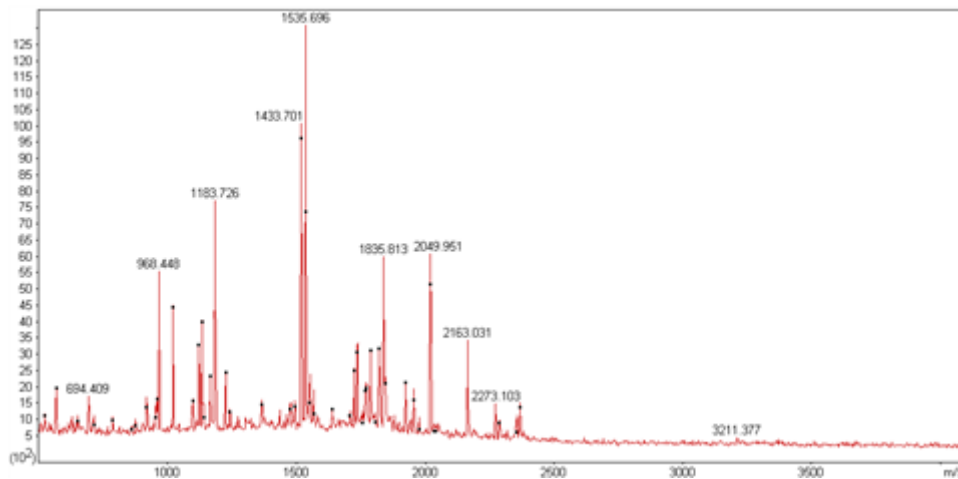

### Probability Based Mowse Score:

Protein score is  $-10 \cdot \log(P)$ , where P is the probability that the observed match is a random event. Protein scores greater than 75 are significant ( $p < 0.05$ ).

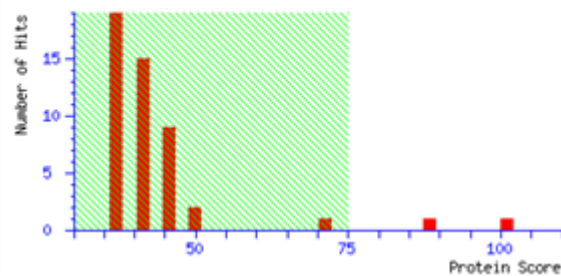

## Matched peptide sequences: shown in **Bold Red**

1 MRVSTLLGLS AYAVAEASCS **RNIIYYDQWH** TDDLPPKDVT HSVTHVMMSF  
 51 ANSSLFTTEP SGKY**YEPFQPL** **KQVRALFDHD** IKVCLAIGGW GDNAGFDAGL  
 101 **KTDRSRERFA** **RNVASTLDRL** GYDCVDIDME YPGGNGADYK QVVNSK**KTYE**  
 151 **IQAFP****KLLKE** IKKFIGSKEL **SIAVPGLERD** MIAYVPSETP **LIEKSVDFVN**  
 201 **VMTYDLMNRR** DSYTTHHVSV KGAARAIK**Y** **LSLGFP****PAHKL** GIPFYAKWFT  
 251 **TKQGYKCTNP** **IGCPTE****LLEN** PKDGSDTGKS GSMTFEAANF VSAPTNLTTT  
 301 PDATCGAGTF FKCAITGGCCA ASGWCGDTAA HCGTGCQSAY GHCDGIDLSA  
 351 SFHEALDKGK **TDKANGGQWY** **WDAPNRIFWS** **WDTPELIAEK** ISLLAKTRGV  
 401 KSVMAWALAL DSHDWSHLKA **MQQGFDRVNA**

## Matched peptides information:

| Start | End | Observed  | Mr (expt) | Mr (calc) | ppm   | M | Peptide                                       |
|-------|-----|-----------|-----------|-----------|-------|---|-----------------------------------------------|
| 22    | 37  | 2017.9709 | 2016.9636 | 2016.9581 | 2.72  | 0 | R.NIIYYDQ <b>WHTD</b> DLPPK.D                 |
| 64    | 71  | 1021.5588 | 1020.5515 | 1020.5280 | 23.0  | 0 | K.Y <b>EPFQPL</b> .Q                          |
| 75    | 82  | 958.5822  | 957.5749  | 957.4920  | 86.6  | 0 | R.ALFD <b>HDIK</b> .V                         |
| 83    | 101 | 1920.9393 | 1919.9320 | 1919.9200 | 6.26  | 0 | K.VCLAIGGW <b>DNAG</b> FDAGLK.T               |
| 112   | 119 | 875.5063  | 874.4991  | 874.4508  | 55.1  | 0 | R.NVAST <b>LDR</b> .L                         |
| 147   | 156 | 1224.6737 | 1223.6664 | 1223.6550 | 9.34  | 1 | K.KTYE <b>IQAFP</b> K.L                       |
| 148   | 156 | 1096.6094 | 1095.6021 | 1095.5600 | 38.4  | 0 | K.TY <b>EIQAFP</b> K.L                        |
| 169   | 179 | 1183.7258 | 1182.7185 | 1182.6608 | 48.8  | 0 | K.EL <b>SIAVPGLER</b> .D                      |
| 180   | 194 | 1721.8104 | 1720.8031 | 1720.8593 | -32.7 | 0 | R.DM <b>IAVPSETP</b> LIEK.S + Oxidation (0)   |
| 195   | 209 | 1803.8354 | 1802.8281 | 1802.8331 | -2.79 | 0 | K.SVDFV <b>VMTYDLMNR</b> .R                   |
| 195   | 209 | 1819.8205 | 1818.8132 | 1818.8281 | -8.16 | 0 | K.SVDFV <b>VMTYDLMNR</b> .R + Oxidation (0)   |
| 195   | 209 | 1835.8132 | 1834.8059 | 1834.8230 | -9.30 | 0 | K.SVDFV <b>VMTYDLMNR</b> .R + 2 Oxidation (0) |
| 230   | 239 | 1132.6021 | 1131.5948 | 1131.6077 | -11.3 | 0 | K.YLS <b>LGFP</b> PAHK.L                      |
| 257   | 272 | 1842.8769 | 1841.8696 | 1841.8652 | 2.42  | 0 | K.C <b>THFIGCPTE</b> LLENPK.D                 |
| 364   | 376 | 1534.6967 | 1533.6894 | 1533.6749 | 9.46  | 0 | K.A <b>NGGQWDA</b> FNH.I                      |
| 377   | 390 | 1734.8898 | 1733.8825 | 1733.8665 | 9.27  | 0 | R.I <b>PWSWDTPE</b> LIAEK.I                   |
| 420   | 427 | 952.4906  | 951.4833  | 951.4232  | 63.2  | 0 | K.A <b>MQGFDR</b> .V                          |
| 420   | 427 | 968.4479  | 967.4407  | 967.4182  | 23.3  | 0 | K.A <b>MQGFDR</b> .V + Oxidation (0)          |

Spot No.: **80**

Mascot score: **211**

Species: *Fusarium oxysporum f. sp. cubense race 4*

Protein name: **Alpha-galactosidase 2**

NCBI accession No.: **gi| 475672613**      Sequence coverage %: **47**

Matched peptides No.: **35**      Total peptides No.: **67**

Calculated Mr: **83037**      Calculated pI: **5.01**

### Annotated PMF spectra:

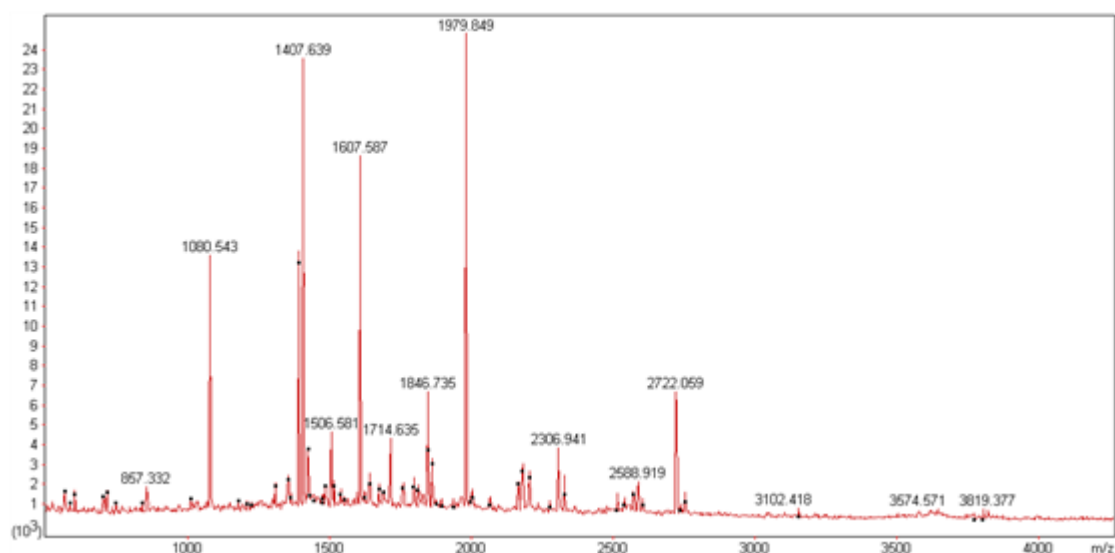

### Probability Based Mowse Score:

Protein score is  $-10 \cdot \log(P)$ , where P is the probability that the observed match is a random event. Protein scores greater than 75 are significant ( $p < 0.05$ ).

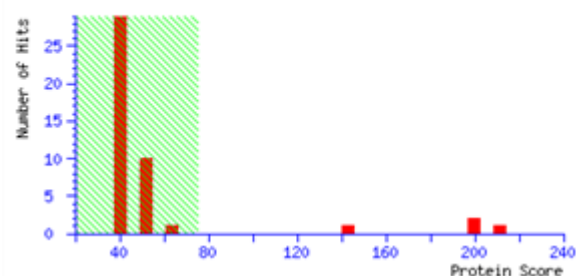

Matched peptide sequences: shown in **Bold Red**

```

1 MVLVTSKGIT TAAVLFSQVI SAFAETSDPI RVDGTSFALN GNNVSYRFHV
51 DNTTGDLLIND HYGGPVAEDG ITTEIGPIQG WVNLIQVRR EFPDHGRGDF
101 RIPAFQLQQA SGTTVTDFRY KSHEVVQKPK GLPGLPSTFG EADDVSTLVV
151 HMYDNYSSIA VDLSYSIFPE YDAIVRSVNI TNQGNATINL RKVSSWSVDL
201 QQDNLDLIEI KGDWAREGMR VRRKVDFTGQ GFQSSSTGYSS HLHNPFLALV
251 SSTTTETQGE AWGFSLVYTG SFAVDVEKSS QGLTRAILGL NPLDFSWPLK
301 PEQTFPTPEV VSVFSNKGVG GMSRQFHRLY RKHLMKSKYA EETRPVLLNS
351 WEGLAFDINE TAIEKIAKQS ADLGIKLFVM DDGWFGNKYP RVNDTAGLGD
401 WQPDKSRFPD GLTPLVENVT DLKVANSSDE LKFGIWFEPE MVNPESDLYD
451 KHPDWAIHAG SYPRTETRNQ LVLNLALPEV QEFIIDFVSK VLRESPISYV
501 KWDNNRGIHE TPDPTLNYKY MLGLYHVFET LTRFPDVLW EGCASGGGRF
551 DPGVLQWFPQ IWTSDDTDAV ERIAIQFGTS LAYPPSAMGA HLSHVPNGNT
601 QRITSVKFRA HVAMMGSFG VELDPSDLEP EEREQIPGLI ELSEKINPIV
651 ITGDFYRLAL PEETNYPAGQ FISEDGKKV LFAFQTRATI NNSWPWFRLQ
701 GLDASAKYKV DNNQTVSGST LMNLGIQLRF EGDYDSQVLM IEKQ

```

Matched peptides information:

| Start | End | Observed  | Mr (expt) | Mr (calc) | ppm    | Δ | Peptide                                                 |
|-------|-----|-----------|-----------|-----------|--------|---|---------------------------------------------------------|
| 90    | 97  | 1013.4303 | 1012.4230 | 1012.4839 | -60.1  | 1 | R.EEFPDGR.G                                             |
| 91    | 97  | 857.3317  | 856.3244  | 856.3828  | -69.1  | 0 | R.EEFDGR.G                                              |
| 102   | 119 | 1979.8491 | 1978.8418 | 1979.0113 | -85.6  | 0 | R.IPAFQLQQA <b>SGTTVTDFRY</b> .Y                        |
| 192   | 211 | 2329.9838 | 2328.9765 | 2329.2165 | -103.1 | 0 | R.KYSNFDLQQG <b>LDLIEIK</b> .G                          |
| 193   | 211 | 2201.8890 | 2200.8817 | 2201.1216 | -109.0 | 0 | K.YSHFDLQQG <b>LDLIEIK</b> .G                           |
| 212   | 216 | 604.2859  | 603.2786  | 603.2765  | 3.50   | 0 | K.CDVA.R                                                |
| 279   | 285 | 748.3720  | 747.3647  | 747.3975  | -30.3  | 0 | K.SSQLR.A                                               |
| 286   | 317 | 3574.5704 | 3573.5633 | 3573.8759 | -87.3  | 0 | R.AILQWPLD <b>SGDKQETTTPEVDFEIK</b> .G                  |
| 325   | 328 | 587.3044  | 586.2971  | 586.2976  | -0.82  | 0 | R.QNR.L                                                 |
| 377   | 388 | 1428.5250 | 1427.5177 | 1427.6944 | -85.7  | 0 | K.LFWDGDTGR.Y                                           |
| 377   | 388 | 1444.5522 | 1443.5449 | 1443.6493 | -72.3  | 0 | K.LFWDGDTGR.Y + Oxidation (O)                           |
| 377   | 391 | 1944.7063 | 1943.6990 | 1943.8716 | -93.6  | 1 | K.LFWDGDTGR.Y.Y                                         |
| 377   | 391 | 1860.7121 | 1859.7048 | 1859.8665 | -84.9  | 1 | K.LFWDGDTGR.Y.Y + Oxidation (O)                         |
| 406   | 423 | 2000.5681 | 1999.5608 | 2000.0379 | -99.3  | 1 | K.SRFDLTLV <b>DFYDLE</b> .Y                             |
| 409   | 423 | 1757.7653 | 1756.7580 | 1756.9247 | -94.9  | 0 | R.FFDGLTLV <b>DFYDLE</b> .Y                             |
| 433   | 464 | 3819.3765 | 3818.3692 | 3818.7464 | -98.8  | 1 | K.FGDKET <b>YRPESLDYKFNDAIKAGSYR</b> .T + Oxidation (O) |
| 432   | 464 | 1006.5803 | 1005.5732 | 1005.7164 | -93.1  | 0 | K.FGDK <b>IAAGSYR</b> .T                                |
| 452   | 468 | 1993.8126 | 1992.8053 | 1992.9554 | -75.3  | 1 | K.FGDK <b>IAAGSYR</b> .T.H                              |
| 502   | 506 | 704.2916  | 703.2843  | 703.3038  | -27.7  | 0 | K.VDRR.G                                                |
| 507   | 519 | 1484.5745 | 1483.5672 | 1483.7307 | -110.0 | 0 | R.GHET <b>PTLNYK</b> .Y                                 |
| 535   | 549 | 1607.5867 | 1606.5794 | 1606.7198 | -87.4  | 0 | R.FFDV <b>NEOCASGR</b> .F                               |
| 550   | 572 | 2722.0586 | 2721.0513 | 2721.2711 | -80.8  | 0 | R.FDP <b>FLQYQDVTSDTDAVER</b> .I                        |
| 573   | 602 | 3152.2151 | 3151.2078 | 3150.5669 | 203.0  | 0 | R.SAQ <b>QTSLAYFPAQAKLRYRQTR</b> .I + Oxidation (O)     |
| 610   | 633 | 2572.9111 | 2571.9038 | 2572.1574 | -98.6  | 0 | R.AFYAD <b>SGSFVELDPSDLEPER</b> .E                      |
| 610   | 633 | 2588.9194 | 2587.9121 | 2588.1523 | -92.8  | 0 | R.AFYAD <b>SGSFVELDPSDLEPER</b> .E + Oxidation (O)      |
| 610   | 633 | 2604.8808 | 2603.8735 | 2604.1472 | -105.0 | 0 | R.AFYAD <b>SGSFVELDPSDLEPER</b> .E + 2 Oxidation (O)    |
| 634   | 645 | 1355.5484 | 1354.5411 | 1354.7344 | -143.0 | 0 | R.EQIP <b>OLISEK</b> .I                                 |
| 646   | 657 | 1407.6391 | 1406.6318 | 1406.7858 | -88.1  | 0 | K.INP <b>ITDGYR</b> .L                                  |
| 658   | 677 | 2178.8324 | 2177.8253 | 2178.0480 | -102.0 | 0 | R.LALP <b>ETRYFAQFISEDK</b> .E                          |
| 658   | 678 | 2306.9409 | 2305.9336 | 2306.1430 | -90.8  | 1 | R.LALP <b>ETRYFAQFISEDK</b> .V                          |
| 678   | 687 | 1208.6078 | 1207.6003 | 1207.7077 | -88.9  | 1 | K.RY <b>LFATGR</b> .A                                   |
| 679   | 687 | 1080.5430 | 1079.5357 | 1079.6128 | -71.4  | 0 | K.VY <b>LFATGR</b> .A                                   |
| 688   | 698 | 1391.5577 | 1390.5504 | 1390.6782 | -91.9  | 0 | R.AT <b>DRRWGR</b> .L                                   |
| 730   | 743 | 1673.5923 | 1672.5850 | 1672.7454 | -108.0 | 0 | R.FEGD <b>YSQVLM</b> .Q                                 |

Spot No.: **81**

Mascot score: **112**

Species: *Fusarium oxysporum f. sp. cubense race 4*

Protein name: **Amidase Family Protein**

NCBI accession No.: **gi| 475668007**      Sequence coverage %: **39**

Matched peptides No.: **18**      Total peptides No.: **64**

Calculated Mr: **63645**      Calculated pI: **6.86**

### Annotated PMF spectra:

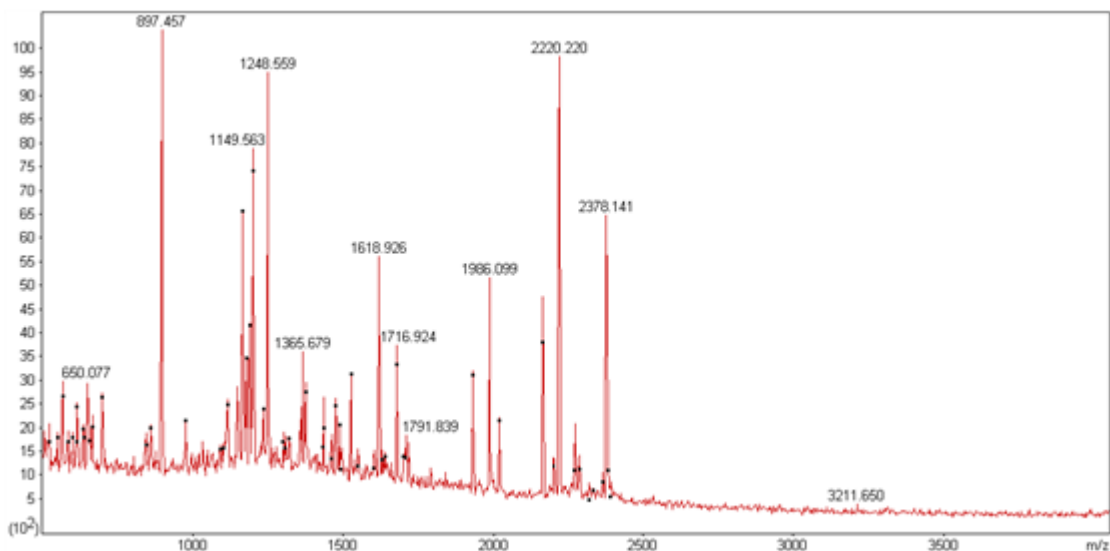

### Probability Based Mowse Score:

Protein score is  $-10 \cdot \log(P)$ , where P is the probability that the observed match is a random event. Protein scores greater than 75 are significant ( $p < 0.05$ ).

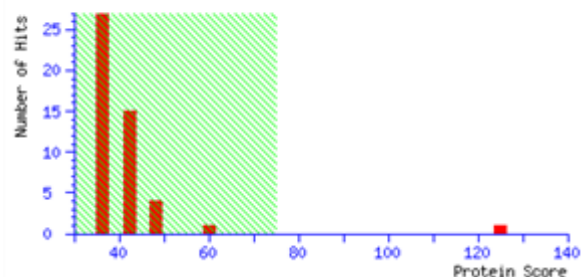

## Matched peptide sequences: shown in **Bold Red**

```

1  MKLLGLSLAT GLIAQGVSAT PKQSKNEPLF AIQPNMIPLE KNAGSPDLFF
51 MPDCNGFKLE EATFTEMQDA MKAGKLTSVQ LVTCYLMRTY QTKEYLNSVL
101 QVNPDAFAIA AERDAERAKG KCRGPLHGIP FTVKDNIATK DSLETTAGSW
151 ALLGNVPRD AHVVKKLRDA GAVLFGKAAL SEWADMRSND YSEGYARGG
201 QVRSAYNLTV NPGGSSSSGSG VGVGANVIAF SLGTETDGSV INPANRNALV
251 GIKPTVGLTS RAGVIPSEH QDSVGCFAKN VKDAALVLDA IYGVDKRDNY
301 TEGQKNKTPK GGYAQYLTDK KALKGATFGL PWKSFALAD EDMQSQLEL
351 VDLIKSAGAT IINGTEITNY ETIVSPDGWN WDYGTTTRGFP NESEYTYIKV
401 DFYRNIETYL SEVKNTNVRN LEDIVKFNKQ YDGVGGYPY KNGKGIPAF
451 SGQDGFASL KSKGVQDETY WQALEFCQTS CRKGINEALT YKGKKLSGLL
501 VPPQVAQAPQ IAAQAGYPVI TIPGGYAKDS GMPFGLGIMQ TAWAEAELVK
551 WASAIEDLQR STDAPSKRRL PKFLGYLERN VVPVF

```

## Matched peptides information:

| Start - End | Observed  | Mr (expt) | Mr (calc) | ppm   | M | Peptide                                    |
|-------------|-----------|-----------|-----------|-------|---|--------------------------------------------|
| 76 - 88     | 1599.8270 | 1598.8197 | 1598.8160 | 2.30  | 0 | K.LTSVQLVTCYLMR.T + Oxidation (0)          |
| 94 - 113    | 2220.2205 | 2219.2132 | 2219.1222 | 41.0  | 0 | K.EYLNSVLQVNPDAFAIAAER.D                   |
| 141 - 159   | 1986.0992 | 1985.0919 | 1985.0218 | 35.3  | 0 | K.DSLETTAGSMALLGNVPR.D                     |
| 178 - 187   | 1149.5633 | 1148.5560 | 1148.5284 | 24.0  | 0 | K.AALSEHADMR.S                             |
| 178 - 187   | 1165.5567 | 1164.5494 | 1164.5233 | 22.4  | 0 | K.AALSEHADMR.S + Oxidation (0)             |
| 188 - 198   | 1248.5590 | 1247.5517 | 1247.5054 | 37.1  | 0 | R.SNDYSEGYAR.G                             |
| 247 - 261   | 1525.9544 | 1524.9471 | 1524.8988 | 31.7  | 0 | R.NALVOIKPTVLTSR.A                         |
| 262 - 279   | 1930.9415 | 1929.9342 | 1929.8891 | 23.4  | 0 | R.AGVIPSEHQDSVOCFAK.N                      |
| 283 - 297   | 1618.9264 | 1617.9191 | 1617.8726 | 28.8  | 1 | K.DAALVLDAIYGVDSR.D                        |
| 311 - 320   | 1115.3672 | 1114.3599 | 1114.5295 | -152  | 0 | K.GGYAQYLTDK.K                             |
| 325 - 333   | 976.4867  | 975.4794  | 975.5178  | -39.4 | 0 | K.GATFGLPMK.S                              |
| 400 - 404   | 699.2947  | 698.2874  | 698.3388  | -73.6 | 0 | K.VDFYR.N                                  |
| 430 - 441   | 1375.6571 | 1374.6498 | 1374.6092 | 29.6  | 0 | K.QYDQVGGQYFYK.N                           |
| 445 - 461   | 1678.8943 | 1677.8870 | 1677.8726 | 8.58  | 0 | K.GIPAFASQDGFASLK.S                        |
| 464 - 482   | 2378.1411 | 2377.1338 | 2377.0103 | 51.9  | 0 | K.GVQDETYWQALEFCQTSR.K                     |
| 529 - 550   | 2367.2641 | 2366.2568 | 2366.1286 | 54.2  | 0 | K.DSGMPPGLGIMQTAWAEAELVK.W + Oxidation (0) |
| 551 - 560   | 1188.6239 | 1187.6166 | 1187.5935 | 19.5  | 0 | K.WASAIEDLQR.S                             |
| 573 - 579   | 897.4572  | 896.4500  | 896.4756  | -28.6 | 0 | K.FLOYLER.N                                |

Spot No.: **82**

Mascot score: **98**

Species: *Fusarium oxysporum f. sp. cubense race 1*

Protein name: **I-amino acid oxidase**

NCBI accession No.: **gi| 477517233**      Sequence coverage %: **35**

Matched peptides No.: **23**      Total peptides No.: **83**

Calculated Mr: **67814**      Calculated pI: **5.69**

### Annotated PMF spectra:

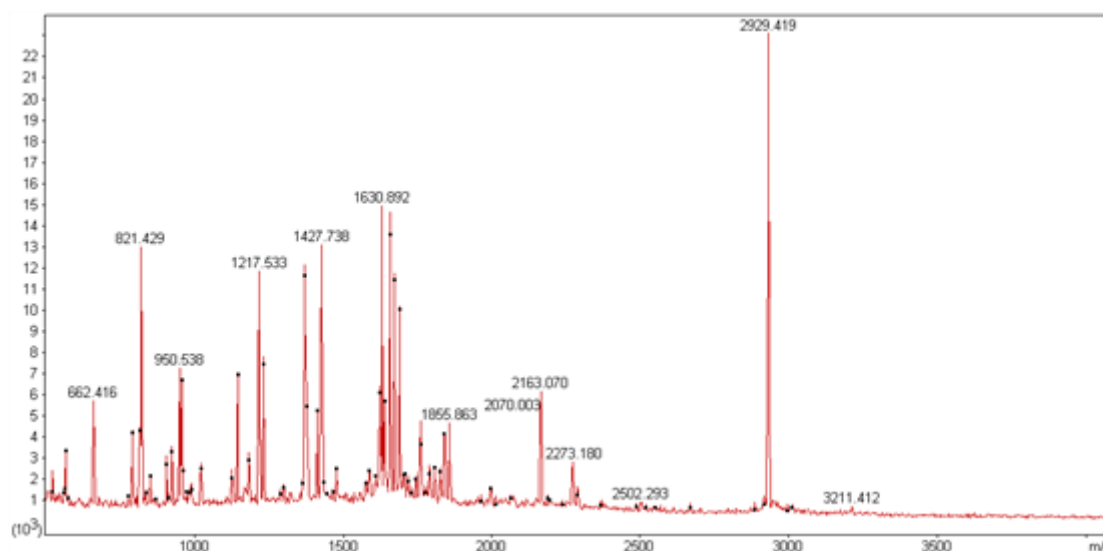

### Probability Based Mowse Score:

Protein score is  $-10 \cdot \log(P)$ , where P is the probability that the observed match is a random event. Protein scores greater than 75 are significant ( $p < 0.05$ ).

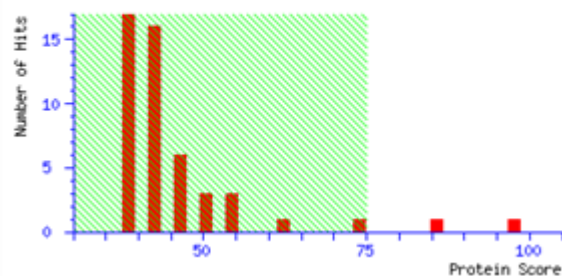

Matched peptide sequences: shown in **Bold Red**

1 MVK**FTDEPWG** **ASVLVLLFLS** **NAHGTKLPLK** AQQTHLCADK PQMQNFDSVG  
 51 AWFDDVAKLN CTSVSKAPNA SIAIVGGGVS GLTTALMLDS IGLHNWDIIE  
 101 ASDRVGGRFR **TKFVGGTKEF** **AEMGPMRLPY** **TVTYKSDNST** YEYTEHRLTF  
 151 QLAEILNEMN GNDSKWKVDF ISWIQHHPNE LIAWGTGRHP DGR**IPTRADI**  
 201 **HANSSLGKPP** **AIVSTEYNET** **KHRMNEILKN** ETMLKAIQAD **VWRSHKFVMS**  
 251 QGYDDWSEQC MMREAFHASE NITDAIWTAT DYDVVWDEM V HNSNLALDGT  
 301 KDSLGETEWK **CVDGGFNRLT** **DAFIPHVSDR** LVLNRKIGKL ESVKGEDGQT  
 351 QTRL<sup>SW</sup>YPSV KNRTFESKDY **DYTIMAVPFT** **MTRFMALPSF** **SSVLGRAISE**  
 401 **AGLRFKSACK** **VSLLFSERFW** EKGERPIFGG YSIPESRPIG ALYYPVYGLN  
 451 ESRLGLITHY RGGDWSDRYV **SFSDEEHVQT** **VLDAIVSLHG** **EQARELYTGD**  
 501 **YERLCWLQDE** HTATSWCRPD VEQHNL<sup>Y</sup>IPA YHQTEHNTIF IGEHTAPTQA  
 551 WISSAIYSAA **RGTIQLLLEL** **GMVEEAK**EIN RRWMGRWIRD ETKP

Matched peptides information:

| Start | End | Observed  | Mr (expt) | Mr (calc) | ppm   | M | Peptide                                        |
|-------|-----|-----------|-----------|-----------|-------|---|------------------------------------------------|
| 4     | 26  | 2502.2934 | 2501.2861 | 2501.2955 | -3.74 | 0 | K.FTDEPWGASVLVLLFLSN <b>HAHOTK</b> .L          |
| 111   | 118 | 837.4418  | 836.4346  | 836.4756  | -49.1 | 1 | R.TK <b>FVGGTKE</b> .E                         |
| 113   | 127 | 1656.7644 | 1655.7571 | 1655.7800 | -13.8 | 1 | K.FVGGTKE <b>FAEMGPMR</b> .L                   |
| 113   | 127 | 1672.7480 | 1671.7407 | 1671.7749 | -20.4 | 1 | K.FVGGTKE <b>FAEMGPMR</b> .L + Oxidation (0)   |
| 113   | 127 | 1688.7530 | 1687.7457 | 1687.7698 | -14.3 | 1 | K.FVGGTKE <b>FAEMGPMR</b> .L + 2 Oxidation (0) |
| 128   | 135 | 984.4756  | 983.4684  | 983.5328  | -65.5 | 0 | R.LPYTVTYK.S                                   |
| 194   | 221 | 3010.3758 | 3009.3685 | 3008.5567 | 270   | 1 | R.IPTRAD <b>IHANSSLGKPPAIVSTEYNETK</b> .H      |
| 236   | 243 | 958.5124  | 957.5052  | 957.5032  | 2.06  | 0 | K.AIQAD <b>VMR</b> .S                          |
| 311   | 318 | 924.4034  | 923.3961  | 923.3920  | 4.46  | 0 | K.CVDGG <b>FNR</b> .L                          |
| 319   | 330 | 1370.7336 | 1369.7263 | 1369.6990 | 19.9  | 0 | R.LTDA <b>FIPHVSDR</b> .L                      |
| 369   | 383 | 1823.8696 | 1822.8623 | 1822.8270 | 19.4  | 0 | K.DYD <b>YTIMAVPFTMTR</b> .F                   |
| 369   | 383 | 1839.8654 | 1838.8581 | 1838.8219 | 19.7  | 0 | K.DYD <b>YTIMAVPFTMTR</b> .F + Oxidation (0)   |
| 369   | 383 | 1855.8626 | 1854.8553 | 1854.8168 | 20.8  | 0 | K.DYD <b>YTIMAVPFTMTR</b> .F + 2 Oxidation (0) |
| 384   | 396 | 1411.7520 | 1410.7447 | 1410.7330 | 8.34  | 0 | R.FMALP <b>SFSSVLGR</b> .A                     |
| 384   | 396 | 1427.7375 | 1426.7302 | 1426.7279 | 1.65  | 0 | R.FMALP <b>SFSSVLGR</b> .A + Oxidation (0)     |
| 397   | 404 | 816.4532  | 815.4459  | 815.4501  | -5.11 | 0 | R.AISE <b>AGLR</b> .F                          |
| 411   | 418 | 950.5379  | 949.5306  | 949.5233  | 7.69  | 0 | K.VS <b>LLFSER</b> .F                          |
| 462   | 468 | 792.3092  | 791.3019  | 791.3198  | -22.7 | 0 | R.GGD <b>NSDR</b> .Y                           |
| 469   | 494 | 2929.4189 | 2928.4116 | 2928.4254 | -4.69 | 0 | R.YV <b>SFSDEEHVQTVLDAIVSLHGBQAR</b> .E        |
| 495   | 503 | 1145.5067 | 1144.4994 | 1144.5036 | -3.69 | 0 | R.ELY <b>TQDYER</b> .L                         |
| 562   | 577 | 1743.8978 | 1742.8905 | 1742.9488 | -33.4 | 0 | R.OTI <b>QLLLELGMVEEAK</b> .E                  |
| 562   | 577 | 1759.9462 | 1758.9389 | 1758.9437 | -2.72 | 0 | R.OTI <b>QLLLELGMVEEAK</b> .E + Oxidation (0)  |
| 583   | 586 | 565.2663  | 564.2590  | 564.2478  | 19.8  | 0 | R.W <b>MR</b> .W + Oxidation (0)               |



Spot No.: **83**

Mascot score: **150**

Species: *Fusarium oxysporum f. sp. cubense race 4*

Protein name: **Alpha-galactosidase 2**

NCBI accession No.: **gi| 475672613**      Sequence coverage %: **35**

Matched peptides No.: **27**      Total peptides No.: **62**

Calculated Mr: **83037**      Calculated pI: **5.01**

### Annotated PMF spectra:

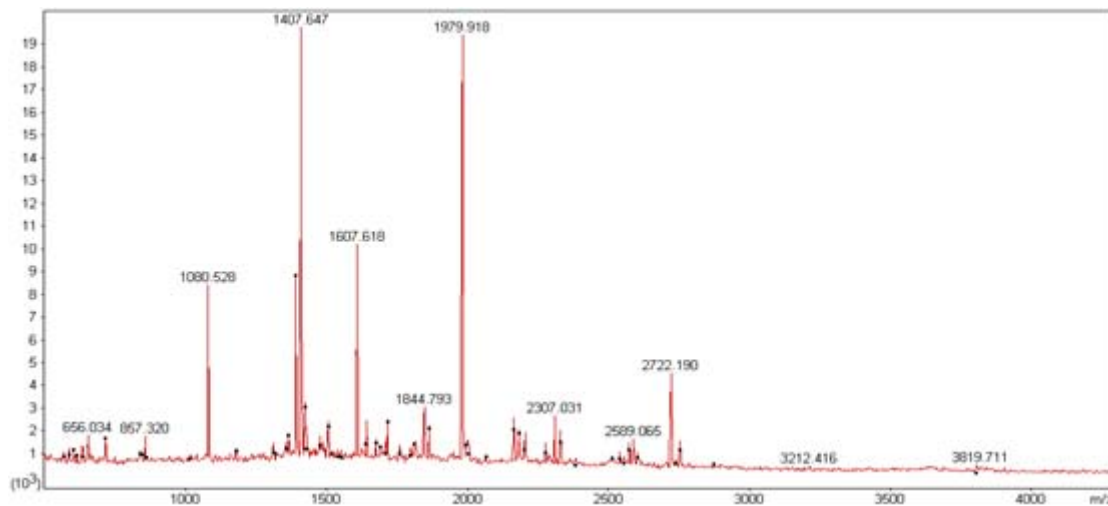

### Probability Based Mowse Score:

Protein score is  $-10 \cdot \log(P)$ , where P is the probability that the observed match is a random event. Protein scores greater than 75 are significant ( $p < 0.05$ ).

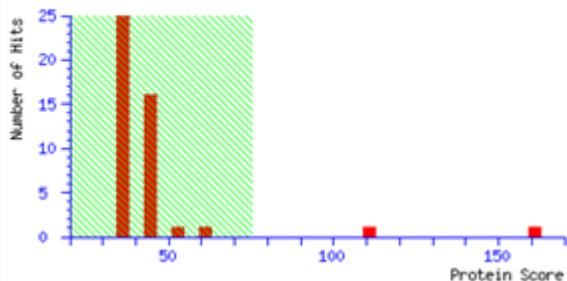

Matched peptide sequences: shown in **Bold Red**

1 MVLVTSKGIT TAAVLFSQVI SAFAETSDPI RVDGTSFALN GNNVSYRFHV  
 51 DNTTGDGLIND HYGGPVAEDG ITTEIGPIQG WVNLIQRVRR **EPFDHGRGDF**  
 101 **RIPAFQLQQA** **SGTTVTDFRY** KSHEVVQGKP GLPGLPSTFG EADDVSTLVV  
 151 HMYDNYSSIA VDLSYSIFPE YDAIVRSVNI TNQGNATINL **RKVSSWSVDL**  
 201 **QQDNLDLIEI** **KGDWAREGMR** VRRKVDFTGQ GFQSSTGYSS HLHNPFLALV  
 251 SSTTTTETQGE AWGFSLVYTG SFAVDVEKSS QGLTRAILGL NPLDFSWPLK  
 301 PEQFTTPEV VSVFSNKGVG GMSR**QFHR**LY RKHLMKSKYA EETRPVLLNS  
 351 WEGLAFDINE TAIEKIAKQS ADLGIK**LFVM** **DDGWFGNKYP** RVNDTAGLGD  
 401 **WQPKSRFPD** **GLTPLVENVT** **DLKVANSSDE** **LKFGIWFEP**E **MVNPESDLYD**  
 451 **KHPDWAIHAG** **SYPRTE**TRNQ LVLNLALPEV QEFIIDFVSK VLRESPISYV  
 501 KWDNNRGIHE TPDPTLNYKY MLGLYHFET LISR**FPDVLW** **EGCASGGGRF**  
 551 **DPGVLQWFPQ** **IWTSDDTDAV** **ERIAIQFGTS** LAYPPSAMGA HLSHVPNGNT  
 601 QRITSVKFRA **HVAMMGG**SFG **VELDPSDLEP** **EEREQIPGLI** **ELSEKINPIV**  
 651 **ITGDFYRLAL** **PEETNYPAGQ** **FISEDGKKV** **LFAFQTRATI** **NNSWPWFRLQ**  
 701 GLDASAKYKV DNNQIVSGST LMNLGIQLRF **EGDYDSQVLM** **IEKQ**

Matched peptides information:

| Start - End | Observed  | Mr(expt)  | Mr(calc)  | ppm   | M | Peptide                                             |
|-------------|-----------|-----------|-----------|-------|---|-----------------------------------------------------|
| 90 - 97     | 1013.3387 | 1012.3314 | 1012.4839 | -151  | 1 | R.EPFFDHR.G                                         |
| 91 - 97     | 857.3204  | 856.3131  | 856.3828  | -81.4 | 0 | R.EPFDHR.G                                          |
| 102 - 119   | 1979.9182 | 1978.9109 | 1979.0113 | -50.7 | 0 | R.IPAPQLQASGTTVTDFR.Y                               |
| 192 - 211   | 2330.0866 | 2329.0793 | 2329.2165 | -58.9 | 1 | R.RVSSWSVDLQQDNLDLIEIK.G                            |
| 212 - 216   | 604.2408  | 603.2335  | 603.2765  | -71.2 | 0 | K.GDWAR.E                                           |
| 325 - 328   | 587.1770  | 586.1697  | 586.2976  | -218  | 0 | R.QFHR.L                                            |
| 377 - 388   | 1428.5860 | 1427.5787 | 1427.6544 | -53.0 | 0 | K.LFVMDGWFNGK.Y                                     |
| 377 - 391   | 1844.7926 | 1843.7853 | 1843.8716 | -46.8 | 1 | K.LFVMDGWFNGK.YPR.V                                 |
| 377 - 391   | 1860.7449 | 1859.7376 | 1859.8665 | -69.3 | 1 | K.LFVMDGWFNGK.YPR.V + Oxidation (0)                 |
| 406 - 423   | 2000.9543 | 1999.9470 | 2000.0579 | -55.4 | 1 | K.SRFFDGLTPLVENVTDLK.V                              |
| 408 - 423   | 1757.7697 | 1756.7624 | 1756.9247 | -92.4 | 0 | R.FFDLTPLVENVTDLK.V                                 |
| 433 - 464   | 3819.7109 | 3818.7036 | 3818.7464 | -11.2 | 1 | K.FGIMFEPENVPESDLYDKHPDWAIHAGSYPR.T + Oxidation (0) |
| 452 - 464   | 1506.6064 | 1505.5991 | 1505.7164 | -77.9 | 0 | K.HPDWAIHAGSYPR.T                                   |
| 452 - 468   | 1993.8879 | 1992.8806 | 1992.9554 | -37.5 | 1 | K.HPDWAIHAGSYPRTETR.H                               |
| 535 - 549   | 1607.6176 | 1606.6103 | 1606.7198 | -68.2 | 0 | R.FFDVMEGCASGGGR.F                                  |
| 550 - 572   | 2722.1904 | 2721.1831 | 2721.2711 | -32.3 | 0 | R.FDPQVLQWFPQIWTSDOTDAVER.I                         |
| 610 - 633   | 2573.0957 | 2572.0884 | 2572.1574 | -26.8 | 0 | R.AEVAHMGGSFVVELDPSDLEPEER.E                        |
| 610 - 633   | 2589.0654 | 2588.0581 | 2588.1523 | -36.4 | 0 | R.AEVAHMGGSFVVELDPSDLEPEER.E + Oxidation (0)        |
| 610 - 633   | 2605.0608 | 2604.0535 | 2604.1472 | -36.0 | 0 | R.AEVAHMGGSFVVELDPSDLEPEER.E + 2 Oxidation (0)      |
| 634 - 645   | 1355.6293 | 1354.6220 | 1354.7344 | -82.9 | 0 | R.EQIFGLIEELSEK.I                                   |
| 646 - 657   | 1407.6475 | 1406.6402 | 1406.7558 | -82.2 | 0 | K.INPIVITGDFYR.L                                    |
| 658 - 677   | 2178.9480 | 2177.9407 | 2178.0480 | -49.3 | 0 | R.LALPEETHYPAQGFISEDOK.K                            |
| 658 - 678   | 2307.0308 | 2306.0235 | 2306.1430 | -51.8 | 1 | R.LALPEETHYPAQGFISEDOK.V                            |
| 679 - 687   | 1080.5278 | 1079.5205 | 1079.6128 | -85.5 | 0 | K.VVLFAPQTR.A                                       |
| 688 - 698   | 1391.5839 | 1390.5766 | 1390.6782 | -73.0 | 0 | R.AVINNSWPWFRL.L                                    |
| 730 - 743   | 1673.6236 | 1672.6163 | 1672.7654 | -89.1 | 0 | R.FEGDYDSQVLMIEK.Q                                  |

Spot No.: **84**

Mascot score: **82**

Species: *Fusarium oxysporum f. sp. cubense race 1*

Protein name: **I-amino acid oxidase**

NCBI accession No.: **gi| 477517233**

Sequence coverage %: **25**

Matched peptides No.: **19**

Total peptides No.: **60**

Calculated Mr: **67814**

Calculated pI: **5.69**

### Annotated PMF spectra:

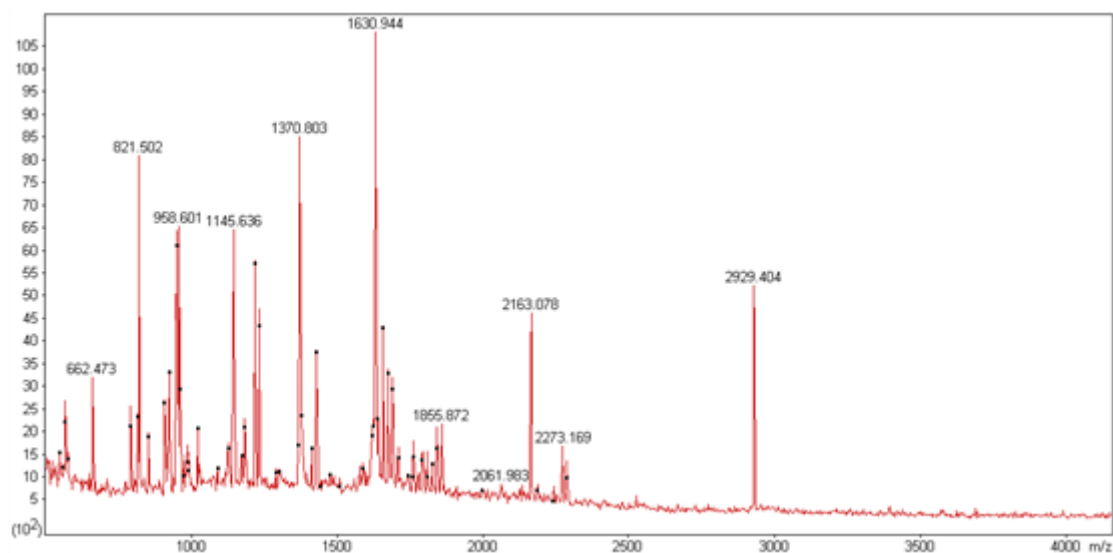

### Probability Based Mowse Score:

Protein score is  $-10 \cdot \log(P)$ , where P is the probability that the observed match is a random event. Protein scores greater than 75 are significant ( $p < 0.05$ ).

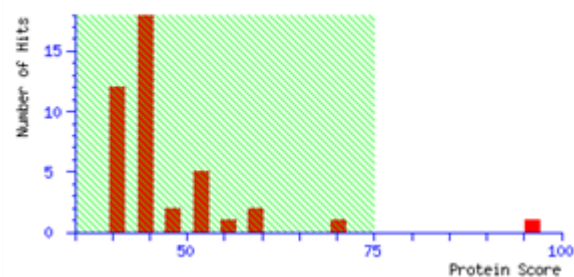

## Matched peptide sequences: shown in **Bold Red**

```

1  MVKFTDEPVG ASVLVLLFSL NAHGTKLPLK AQQTHLCADK PQMQNFDSVG
51  AWFDDVAKLN CTSVSKAPNA SIAIVGGGVS GLTTALMLDS IGLHNWDIIE
101 ASDRVGGGRFR TKFVGGTKEF AEMGPMRLPY TVTYKSDNST YEYTEHRLTF
151 QLAETLNEMN GNDKWKVDF ISWIQHHPNE LIAWGTGRHP DGRIPTADI
201 HANSSLGKPP AIVSTEYNET KHRMNEILKN ETMLKAIQAD VWRSHKFVMS
251 QGYDDWSEQC MMREAFHASE NITDAIWTAT DYDVVWDEM V HNSNLALDGT
301 KDLSGETEWK CVDGGFNRLT DAFIPHVSDR LVLNRKIGKL ESVKGEDGQT
351 QIRLSWYPSV KNRTFESKDY DYTIMAVPFT MTRFMALPSF SSVLGRAISE
401 AGLRFKSACK VSLLFSERFW EKGERPIFGG YSIPESRPIG ALYYPVYGLN
451 ESRPGLITHY RGGDWSDRYV SFSDEEHVQT VLDAIVSLHG EQARELYTGD
501 YERLCWLQDE HTATSWCRPD VEQHNLYIPA YHQTEHNTIF IGEHTAPTQA
551 WISSAIYSAA RTIQLLLEL GMVEEAKEIN RRWMGRWIRD ETKP

```

## Matched peptides information:

| Start - End | Observed  | Mr (expt) | Mr (calc) | ppm   | M | Peptide                               |
|-------------|-----------|-----------|-----------|-------|---|---------------------------------------|
| 113 - 127   | 1656.8566 | 1655.8493 | 1655.7800 | 41.9  | 1 | K.FVGGTKEFAEMGPMR.L                   |
| 113 - 127   | 1672.8276 | 1671.8203 | 1671.7749 | 27.2  | 1 | K.FVGGTKEFAEMGPMR.L + Oxidation (0)   |
| 113 - 127   | 1688.8064 | 1687.7991 | 1687.7698 | 17.4  | 1 | K.FVGGTKEFAEMGPMR.L + 2 Oxidation (0) |
| 128 - 135   | 984.6421  | 983.6348  | 983.5328  | 104   | 0 | R.LPYTVTYK.S                          |
| 236 - 243   | 958.6008  | 957.5935  | 957.5032  | 94.3  | 0 | K.AIQADVWR.S                          |
| 311 - 318   | 924.4700  | 923.4627  | 923.3920  | 76.6  | 0 | K.CVDGGFNR.L                          |
| 319 - 330   | 1370.8030 | 1369.7957 | 1369.6990 | 70.6  | 0 | R.LTDAFIPHVSDR.L                      |
| 369 - 383   | 1823.8939 | 1822.8866 | 1822.8270 | 32.7  | 0 | K.DYDITIMAVPFTMTR.F                   |
| 369 - 383   | 1839.9061 | 1838.8988 | 1838.8219 | 41.8  | 0 | K.DYDITIMAVPFTMTR.F + Oxidation (0)   |
| 369 - 383   | 1855.8716 | 1854.8643 | 1854.8168 | 25.6  | 0 | K.DYDITIMAVPFTMTR.F + 2 Oxidation (0) |
| 384 - 396   | 1411.8488 | 1410.8415 | 1410.7330 | 77.0  | 0 | R.FMALPSFSSVLGR.A                     |
| 384 - 396   | 1427.8049 | 1426.7976 | 1426.7279 | 48.9  | 0 | R.FMALPSFSSVLGR.A + Oxidation (0)     |
| 397 - 404   | 816.4888  | 815.4815  | 815.4501  | 38.5  | 0 | R.AISEAGLR.F                          |
| 411 - 418   | 950.6230  | 949.6158  | 949.5233  | 97.4  | 0 | K.VSLLFSER.F                          |
| 462 - 468   | 792.3802  | 791.3729  | 791.3198  | 67.1  | 0 | R.GGDNSDR.Y                           |
| 469 - 494   | 2929.4037 | 2928.3964 | 2928.4254 | -9.88 | 0 | R.VVSPSDEEHVQTVLDAIVSLHGEQAR.E        |
| 495 - 503   | 1145.6365 | 1144.6292 | 1144.5036 | 110   | 0 | R.ELYTGDIYER.L                        |
| 562 - 577   | 1743.9656 | 1742.9583 | 1742.9488 | 5.47  | 0 | R.GTIQLLLELGMVEEAK.E                  |
| 562 - 577   | 1759.9793 | 1758.9720 | 1758.9437 | 16.1  | 0 | R.GTIQLLLELGMVEEAK.E + Oxidation (0)  |

Spot No.: **85**

Mascot score: **78**

Species: *Fusarium oxysporum f. sp. cubense race 4*

Protein name: **Carboxypeptidase cpdS**

NCBI accession No.: **gi| 475670597**      Sequence coverage %: **29**

Matched peptides No.: **14**      Total peptides No.: **58**

Calculated Mr: **64882**      Calculated pI: **5.94**

### Annotated PMF spectra:

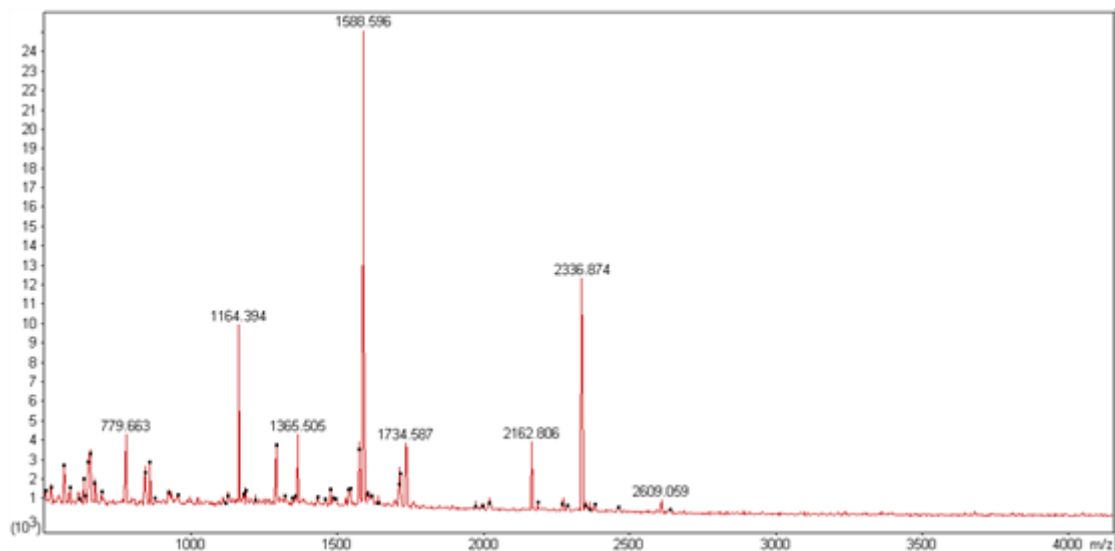

### Probability Based Mowse Score:

Protein score is  $-10 \cdot \log(P)$ , where P is the probability that the observed match is a random event. Protein scores greater than 75 are significant ( $p < 0.05$ ).

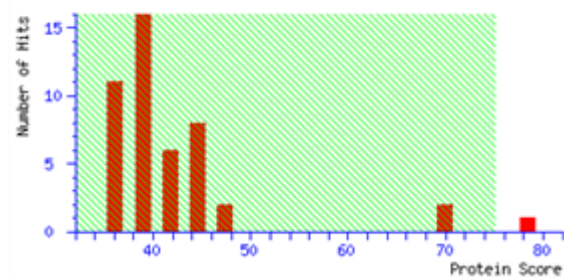

Matched peptide sequences: shown in **Bold Red**

```

1 MRFSLISTLL AFGTLSQAAF NKGAINAFNR VHPRRYDERR AAAPAPEQPA
51 FEKRSKSKFL NKHSEKFVFN GSAIPEVKFD VGESYAGLLP ISQDPDEERK
101 LYFWFFPSTN PKAKKEEVVI WLNGGPGCSS LSGLLTENGP FLWQEGTLAP
151 VPNTYSWTNL TNVIWIEQPV GVGYSQGKPN ITNEVELGKQ FIGFWKNFID
201 TFELKGATTY ITGESYAGYY VPYIADAFIT ANDDDYKLG GVAINDPIIG
251 DGTLQQQAVI FPYIEYWSNL FYLNQTYTNA LRWTHQHCY EKYLKKGYTF
301 PPPEEKFPVL PDPYADTNPK SNYTCDFDY AYAAALDSNP CFNIYHITDT
351 CPHVYSQLGI VNQGDYSPPG AKVYFNRTDV KKALNAPIDQ TWYQCTPNKV
401 FGFQDPSNR SDTSLAPAQN DVLKRVIEHT NNTIIGVGRD DFLLPNGTL
451 FAIQNATWNG KKGFKYKYPQD KQFYVFPFHID YNGGRLSEEG IVGQWGEERG
501 LTWYEVQLAG HELPGYTAGA GYRVVEKLLG RIKNLGTIEN FTTQKGNFQG
551 NPHERDFSVV NPLGLPWGHG FTYA

```

Matched peptides information:

| Start - End | Observed  | Mr (expt) | Mr (calc) | ppm   | M | Peptide                      |
|-------------|-----------|-----------|-----------|-------|---|------------------------------|
| 79 - 99     | 2336.8737 | 2335.8664 | 2336.0808 | -91.8 | 0 | K.FDVGESYAGLLPISQDPDEER.K    |
| 79 - 100    | 2464.9405 | 2463.9332 | 2464.1758 | -98.4 | 1 | K.FDVGESYAGLLPISQDPDEER.L    |
| 190 - 196   | 925.3358  | 924.3285  | 924.4858  | -170  | 0 | K.QFIGFWK.N                  |
| 197 - 205   | 1126.4359 | 1125.4286 | 1125.5706 | -126  | 0 | K.NFIDTFELK.G                |
| 283 - 292   | 1345.4104 | 1344.4031 | 1344.5670 | -122  | 0 | R.WTHQHCYK.Y                 |
| 296 - 306   | 1292.4542 | 1291.4469 | 1291.6448 | -153  | 1 | K.KYOTFPPEEK.F               |
| 297 - 306   | 1164.3935 | 1163.3862 | 1163.5499 | -141  | 0 | K.YOTFPPEEK.F                |
| 307 - 320   | 1573.5692 | 1572.5619 | 1572.7824 | -140  | 0 | K.FPVLDPYADTNPK.S            |
| 383 - 399   | 2019.7018 | 2018.6945 | 2018.9520 | -128  | 0 | K.ALNAPIDQTWYQCTPNK.V        |
| 411 - 424   | 1458.5409 | 1457.5336 | 1457.7362 | -139  | 0 | R.SDTSLAPAQNDVLK.R           |
| 472 - 485   | 1712.6325 | 1711.6252 | 1711.8107 | -108  | 0 | K.QFYVFPFHIDYNGGR.L          |
| 486 - 499   | 1588.5963 | 1587.5890 | 1587.7529 | -103  | 0 | R.LSEEGIVQWGEER.G            |
| 500 - 523   | 2609.0589 | 2608.0516 | 2608.2710 | -84.1 | 0 | R.QLTWYEVQLAGHELPGYTAGAGYR.V |
| 534 - 545   | 1365.5048 | 1364.4975 | 1364.6936 | -144  | 0 | K.NLOTIENFTTQK.G             |

Spot No.: **86**

Mascot score: **216**

Species: *Fusarium oxysporum f. sp. cubense race 4*

Protein name: **Catalase-peroxidase 2**

NCBI accession No.: **gi| 475672437**      Sequence coverage %: **42**

Matched peptides No.: **33**      Total peptides No.: **64**

Calculated Mr: **85233**      Calculated pI: **6.57**

### Annotated PMF spectra:

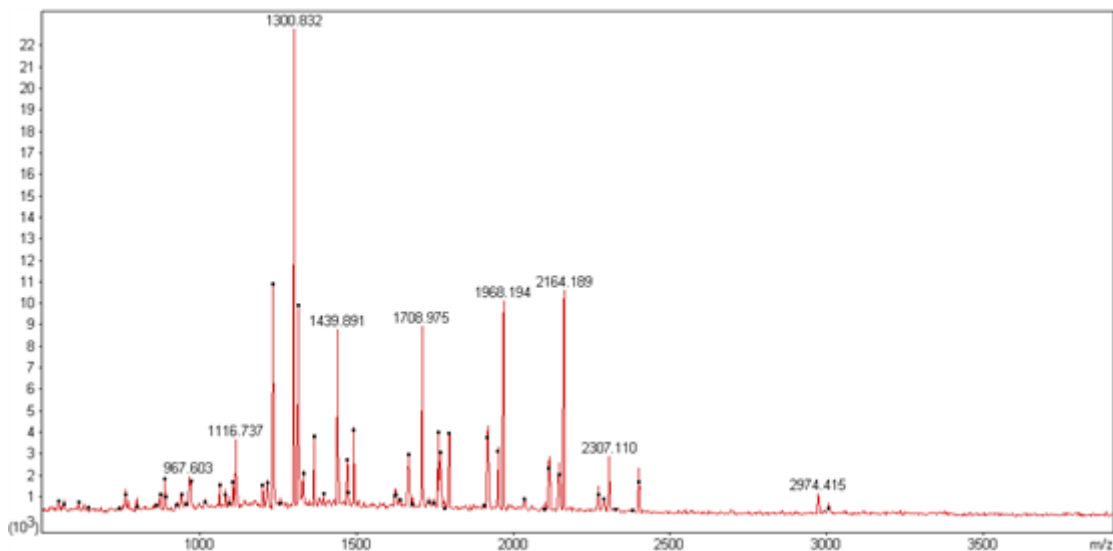

### Probability Based Mowse Score:

Protein score is  $-10 \cdot \log(P)$ , where P is the probability that the observed match is a random event. Protein scores greater than 75 are significant ( $p < 0.05$ ).

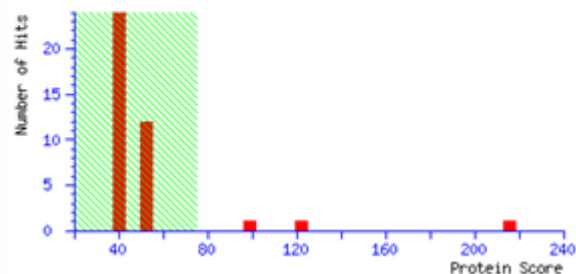

## Matched peptide sequences: shown in **Bold Red**

1 MHVQSLLLAS GLVPLAASQG C**PF**AKRATDT **NLV**PPREIPE DFGICRVASN  
 51 **QAGGG**TRS**RD** **FW**PCALRLDV LRQ**F**SPPY**NP** LGADFDYTEA FKS**L**DFAALK  
 101 **KDLN**ALLTDS **QD**WWPADHGN Y**GG**L**F**IRMSW HSAGTYRAMD **GR**GGSG**MG**QQ  
 151 **RFAP**LDS**WPD** **NQ**NLD**K**ARRL LW**PI**KQKYGS KISWADLMVL AGNVALEHSG  
 201 FETLGFAGGR **AD**TWEADESI Y**W**GAEST**FVP** **KG**NDVRYNGS **TD**IYERADKL  
 251 EKPLGATHFG LIYVNPEGPD GSSDP**K**ASAL **DIR**TAFGRMG MDDEETAALI  
 301 IGGHTLGKTH GAVPAKNIGP EPMAADLGEM GLGWHNSVNE GNGPDQMTSG  
 351 LEVIWSTTPT KWSNHFLKSL LGNNWILVES PAGHKQWEAL NGK**L**EY**PD**PF  
 401 **VKG**KFR**RPTM** **LT**SDLALIND **PS**Y**L**KICKRW HDNP**K**EL**NAA** **FAR**AWY**KL**LH  
 451 RDLGPVSRYL GPEVAKE**KFI** **WQ**DPLPERKG DIIG**EAD**ISS LKSAILSADG  
 501 LDVSKLVSTA WNSASTFRGT DKRGGANGAR **I**ALE**PQ**V**NWV** **SNN**PK**Q**L**KQV**  
 551 LSALKKVQKD FNSKSG**S**K**KV** **SL**ADLIV**GG** **VAA**IE**KAA**QA AGFKD**V**E**V**PF  
 601 **TP**GRVDATQ**N** QIDLVQFGYL EPLADGFRNY **GH**GTAR**ARTE** **EI**LVDRAALL  
 651 **TL**TP**PE**MT**VL** **VG**GLRALNAN YDGSSNGILT EKKGQLT**ND**F FVNLLSPAYS  
 701 **WAK**KDSQ**GEL** **WT**GTDRATKS VKWTATRADL **V**FG**S**H**AEL**RA ISEVYGSADA  
 751 **KE**K**FV**K**D**FIS **AW**TK**V**M**N**LDR FDVKA**E**K

## Matched peptides information:

| Start | End | Observed  | Mr (expt) | Mr (calc) | ppm  | # | Peptide                                |
|-------|-----|-----------|-----------|-----------|------|---|----------------------------------------|
| 27    | 36  | 1083.7202 | 1082.7129 | 1082.8720 | 130  | 0 | R.AIDTRFLVYPR.E                        |
| 37    | 46  | 1038.7377 | 1034.7304 | 1034.8632 | 134  | 0 | R.EIPEDFQICR.V                         |
| 47    | 57  | 1017.6507 | 1016.6434 | 1016.6999 | 141  | 0 | R.YASDAQDQTE.S                         |
| 60    | 67  | 1064.6588 | 1063.6515 | 1063.4909 | 151  | 0 | R.DFYCALR.L                            |
| 68    | 72  | 615.5239  | 614.5166  | 614.3752  | 230  | 0 | R.LDYLR.Q                              |
| 73    | 92  | 2307.1104 | 2306.1031 | 2306.0532 | 21.7 | 8 | R.QFSPPHPLGAEIYVYFAE.S                 |
| 93    | 100 | 864.6738  | 863.6666  | 863.4752  | 222  | 0 | K.SLDFALK.E                            |
| 102   | 127 | 2974.4148 | 2973.4075 | 2973.4046 | 0.99 | 0 | K.DLHALLTGGQNPADHDFYDQLEIR.H           |
| 143   | 161 | 893.9207  | 892.9134  | 892.9821  | 147  | 0 | R.GSSHQQR.F + Oxidation: 00            |
| 162   | 166 | 1759.9020 | 1758.8947 | 1758.8213 | 41.7 | 0 | R.FAPLDHDFMDLX.A                       |
| 169   | 175 | 929.7282  | 924.7209  | 924.5909  | 141  | 1 | R.SLNFIR.Q                             |
| 211   | 231 | 2402.1228 | 2401.1155 | 2401.0750 | 16.9 | 0 | R.ADTWEADESIYGAESTFVPE.G               |
| 237   | 246 | 1217.7362 | 1216.7289 | 1216.5360 | 159  | 0 | R.YNGSTEIVR.A                          |
| 277   | 283 | 749.6024  | 744.5951  | 744.4130  | 245  | 0 | K.ABALDIR.T                            |
| 394   | 402 | 1107.6756 | 1106.6683 | 1106.5648 | 93.6 | 0 | K.LEYDFVTE.G                           |
| 407   | 425 | 2149.1850 | 2147.1777 | 2147.1296 | 22.4 | 0 | R.RPTLTSGLALHDFSYLK.I                  |
| 407   | 425 | 2164.1885 | 2163.1812 | 2163.1245 | 26.2 | 0 | R.RPTLTSGLALHDFSYLK.I + Oxidation: 00  |
| 436   | 443 | 891.6459  | 890.6386  | 890.4610  | 199  | 0 | K.ELHAAFAR.A                           |
| 436   | 447 | 1439.8910 | 1438.8837 | 1438.7357 | 103  | 1 | K.ELHAAFARANYE.L                       |
| 469   | 478 | 1300.8316 | 1299.8243 | 1299.6612 | 126  | 0 | K.FTNGDFLER.E                          |
| 531   | 543 | 1708.9754 | 1707.9681 | 1707.8944 | 43.2 | 0 | R.IALEPQVNVNWF.Q                       |
| 569   | 586 | 1794.1672 | 1793.1599 | 1793.0619 | 43.5 | 1 | K.KVSLADLVLOOTAAIEK.A                  |
| 570   | 588 | 1669.0672 | 1667.0599 | 1666.9869 | 43.8 | 0 | K.VSLADLVLOOTAAIEK.A                   |
| 599   | 604 | 1116.7374 | 1115.7301 | 1115.5611 | 151  | 0 | K.DVEVFFTPR.V                          |
| 629   | 636 | 873.6174  | 874.6101  | 874.4046  | 230  | 0 | R.SYGHQTAI.A                           |
| 637   | 646 | 1201.7889 | 1200.7816 | 1200.6462 | 113  | 1 | R.ARTEILYDR.A                          |
| 639   | 646 | 974.8362  | 973.8289  | 973.5080  | 186  | 0 | R.TEILYDR.A                            |
| 647   | 665 | 1952.2189 | 1951.2116 | 1951.1176 | 48.2 | 0 | R.AALLTTPPEHTVLYDGLR.A                 |
| 647   | 665 | 1968.1937 | 1967.1864 | 1967.1125 | 37.6 | 0 | R.AALLTTPPEHTVLYDGLR.A + Oxidation: 00 |
| 704   | 716 | 1492.8523 | 1491.8450 | 1491.6984 | 100  | 1 | K.KDSQELNTQTER.A                       |
| 705   | 716 | 1364.7695 | 1363.7622 | 1363.6004 | 119  | 0 | K.DSQELNTQTER.A                        |
| 726   | 739 | 1314.8446 | 1313.8373 | 1313.6726 | 125  | 0 | R.ADLVYGSAAELR.A                       |
| 757   | 764 | 967.6031  | 966.5958  | 966.4811  | 119  | 0 | K.DFISANTE.V                           |



Spot No.: **87**

Mascot score: **219**

Species: *Fusarium oxysporum f. sp. cubense race 4*

Protein name: **Catalase-peroxidase 2**

NCBI accession No.: **gi| 475672437**      Sequence coverage %: **41**

Matched peptides No.: **37**      Total peptides No.: **84**

Calculated Mr: **85233**      Calculated pI: **6.57**

### Annotated PMF spectra:

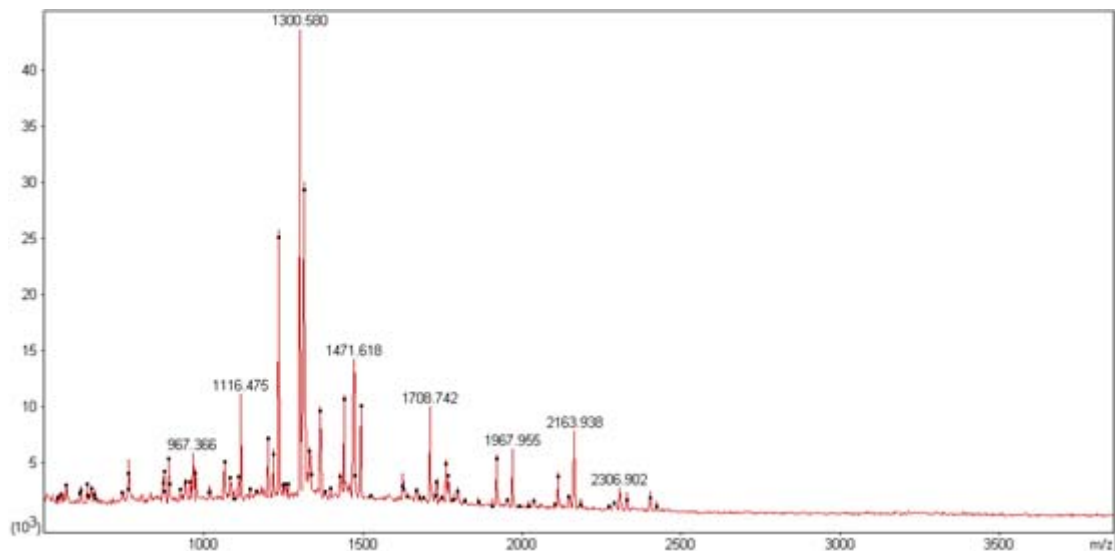

### Probability Based Mowse Score:

Protein score is  $-10 \cdot \log(P)$ , where P is the probability that the observed match is a random event. Protein scores greater than 75 are significant ( $p < 0.05$ ).

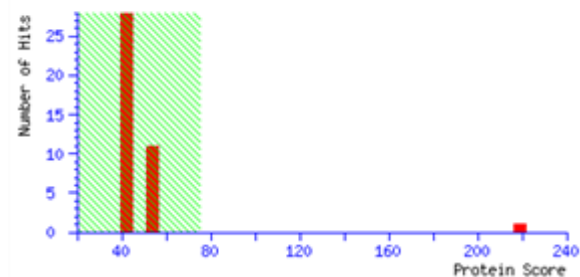

## Matched peptide sequences: shown in **Bold Red**

```

1  MHVQSLLLAS  GLVPLAASQG  CFFAKRATDT  NLVPPREIPE  DFGICRVASN
51  QAGGGTRSRD  FWPCALRLDV  LRQFSPPYNP  LGADFDYTEA  FKSLDFAALK
101 KDLNALLTDS  QDWWPADHGN  YGGLFIRMSW  HSAGTYRAMD  GRGGSGMGQQ
151 RFAPLDSWPD  NQNLDKARRL  LWPIKQKYGS  KISWADLMVL  AGNVALEHSG
201 FETLGFAGGR  ADTWEADESI  YWGAESTFVP  KGNDVRYNGS  TDIYERADKL
251 EKPLGATHFG  LIYVNEPGPD  GSSDPKASAL  DIRTAFGRMG  MDDEETAALI
301 IGGHTLGKTH  GAVPAKNIGP  EPMAADLGEM  GLGWHNSVNE  GNGPDQMTSG
351 LEVIWSTTPT  KWSNHFLKSL  LGNNWTLVES  PAGHKQWEAL  NGKLEYPDPF
401 VKGFRRPTM  LTSDLALIND  PSYLKICKRW  HDNPKELNAA  FARAWYKLLH
451 RDLGPVSRYL  GPEVAKEKFI  WQDPLPERKG  DIIGEADISS  LKSAILSADG
501 LDVSKLVSTA  WNSASTFRGT  DKRGGANGAR  IALEPQVNWV  SNNPKQLKQV
551 LSALKKVQKD  FNSKSGSKKV  SLADLIVLGG  VAAIEKAAQA  AGFKDVEVPPF
601 TPGRVDATQN  QTDLVQFGYL  EPLADGFRNY  GHGTARARTE  EILVDRAALL
651 TLTPPEMTVL  VGGLRALNAN  YDGSSNGILT  EKKGQLTNDF  FVNLLSPAYS
701 WAKKDSQGEL  WTGTDRATKS  VKWTATRADL  VFGSHAELRA  ISEVYGSADA
751 KEKFKDFIS  AWTKVMNLDL  FDVKAEEK

```

## Matched peptides information:

| Start - End | Observed  | Mr (expt) | Mr (calc) | ppm   | M | Peptide                                |
|-------------|-----------|-----------|-----------|-------|---|----------------------------------------|
| 27 - 36     | 1083.4942 | 1082.4869 | 1082.5720 | -78.6 | 0 | R.ATDYNLVPPR.E                         |
| 37 - 46     | 1235.5008 | 1234.4935 | 1234.5652 | -58.1 | 0 | R.EIPEDFOICR.V                         |
| 47 - 57     | 1017.4461 | 1016.4388 | 1016.4999 | -60.1 | 0 | R.VASNQAGGQTR.S                        |
| 60 - 67     | 1064.4210 | 1063.4137 | 1063.4909 | -72.6 | 0 | R.DPWPCALR.L                           |
| 68 - 72     | 615.3749  | 614.3676  | 614.3752  | -12.2 | 0 | R.LDVLR.Q                              |
| 73 - 92     | 2306.9020 | 2305.8947 | 2306.0532 | -68.7 | 0 | R.QFSPPYINPLGADFDYTEAFK.S              |
| 138 - 151   | 1439.6219 | 1438.6146 | 1438.6042 | 7.28  | 1 | R.AMDGRGGSGMQQR.F + 2 Oxidation (0)    |
| 143 - 151   | 877.3822  | 876.3749  | 876.3872  | -14.0 | 0 | R.GGSGMQQR.F                           |
| 143 - 151   | 893.2968  | 892.2895  | 892.3821  | -104  | 0 | R.GGSGMQQR.F + Oxidation (0)           |
| 152 - 166   | 1759.6510 | 1758.6437 | 1758.8213 | -101  | 0 | R.FAPLDSMPDNQHLDK.A                    |
| 169 - 175   | 925.4869  | 924.4797  | 924.5909  | -120  | 1 | R.RLLWPIK.Q                            |
| 211 - 231   | 2401.9427 | 2400.9354 | 2401.0750 | -58.1 | 0 | R.ADTWEADESIYWGAESTFVFK.G              |
| 237 - 246   | 1217.4764 | 1216.4691 | 1216.5360 | -55.0 | 0 | R.YNGSTDYER.A                          |
| 277 - 283   | 745.4133  | 744.4060  | 744.4130  | -9.33 | 0 | K.ASALDIR.T                            |
| 284 - 288   | 551.3281  | 550.3208  | 550.2863  | 62.6  | 0 | R.TAFOR.M                              |
| 394 - 402   | 1107.4458 | 1106.4385 | 1106.5648 | -114  | 0 | K.LEYDPFVK.G                           |
| 407 - 425   | 2147.9567 | 2146.9494 | 2147.1296 | -83.9 | 0 | R.RPTMLTSDLALINDPSYK.I                 |
| 407 - 425   | 2163.9376 | 2162.9303 | 2163.1245 | -89.0 | 0 | R.RPTMLTSDLALINDPSYK.I + Oxidation (0) |
| 436 - 443   | 891.4160  | 890.4087  | 890.4610  | -58.7 | 0 | K.ELNAAFAR.A                           |
| 469 - 478   | 1300.5799 | 1299.5726 | 1299.6612 | -68.1 | 0 | K.FIWQDPLPER.K                         |
| 469 - 479   | 1428.6051 | 1427.5978 | 1427.7561 | -111  | 1 | K.FIWQDPLPERK.G                        |
| 531 - 545   | 1708.7415 | 1707.7342 | 1707.8944 | -93.8 | 0 | R.IALEPQVNVSNNPK.Q                     |
| 569 - 586   | 1795.8607 | 1794.8534 | 1795.0819 | -127  | 1 | K.KVSLADLIVLGGVAAIEK.A                 |
| 570 - 586   | 1667.8038 | 1666.7965 | 1666.9869 | -114  | 0 | K.VSLADLIVLGGVAAIEK.A                  |
| 587 - 604   | 1860.7919 | 1859.7846 | 1859.9530 | -90.5 | 1 | K.AAQAGPFDVEVFPFGR.V                   |
| 595 - 604   | 1116.4754 | 1115.4681 | 1115.5611 | -83.4 | 0 | K.DVEVFPFGR.V                          |
| 629 - 636   | 875.3719  | 874.3646  | 874.4046  | -45.6 | 0 | R.NYGHOTAR.A                           |
| 637 - 646   | 1201.5422 | 1200.5349 | 1200.6462 | -92.7 | 1 | R.ARTTEILVDR.A                         |
| 639 - 646   | 974.4553  | 973.4480  | 973.5080  | -61.7 | 0 | R.TEELVDR.A                            |
| 647 - 665   | 1951.9878 | 1950.9805 | 1951.1176 | -70.3 | 0 | R.AALLTYPPEMTVLVGGLR.A                 |
| 647 - 665   | 1967.9550 | 1966.9477 | 1967.1125 | -83.8 | 0 | R.AALLTYPPEMTVLVGGLR.A + Oxidation (0) |
| 704 - 716   | 1492.6264 | 1491.6191 | 1491.6954 | -51.1 | 1 | K.DSQGELMTOTDR.A                       |
| 705 - 716   | 1364.5451 | 1363.5378 | 1363.6004 | -45.9 | 0 | K.DSQGELMTOTDR.A                       |
| 723 - 727   | 634.2317  | 633.2244  | 633.3235  | -156  | 0 | K.WTATR.A                              |
| 728 - 739   | 1314.5848 | 1313.5775 | 1313.6728 | -72.5 | 0 | R.ADLVFGSHAELR.A                       |
| 757 - 764   | 967.3664  | 966.3591  | 966.4811  | -126  | 0 | K.DFISANTK.V                           |
| 765 - 770   | 763.3562  | 762.3489  | 762.3694  | -26.9 | 0 | K.VMNLDL.F + Oxidation (0)             |

Spot No.: **88**

Mascot score: **249**

Species: *Fusarium oxysporum f. sp. cubense race 4*

Protein name: **Catalase-peroxidase 2**

NCBI accession No.: **gi| 475672437**      Sequence coverage %: **41**

Matched peptides No.: **39**      Total peptides No.: **84**

Calculated Mr: **85233**      Calculated pI: **6.57**

### Annotated PMF spectra:

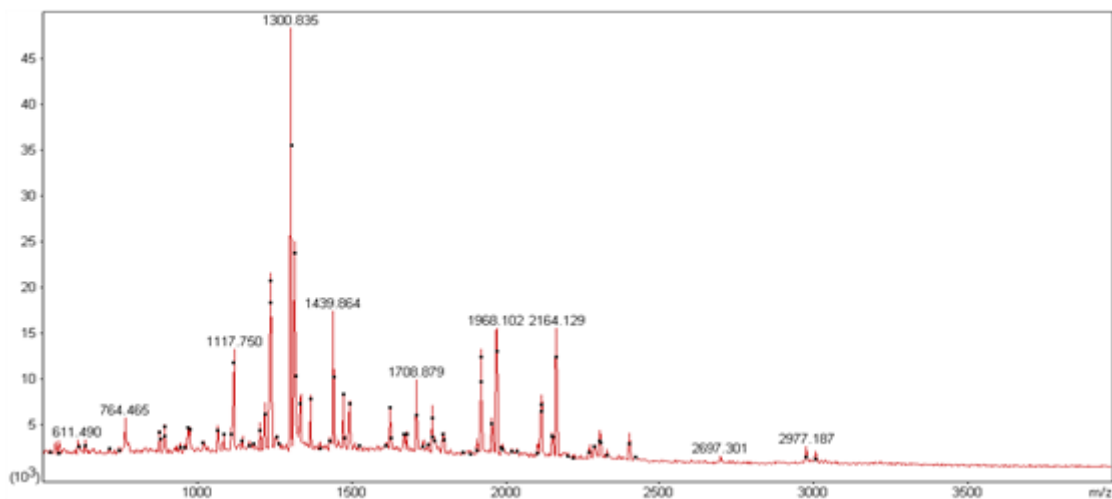

### Probability Based Mowse Score:

Protein score is  $-10 \cdot \log(P)$ , where P is the probability that the observed match is a random event. Protein scores greater than 75 are significant ( $p < 0.05$ ).

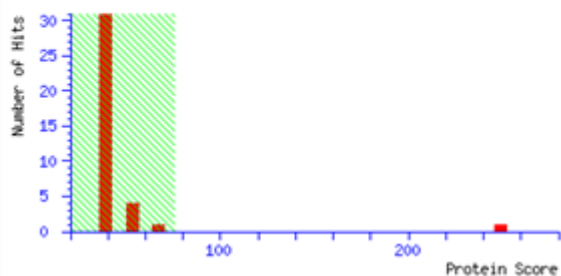

Matched peptide sequences: shown in **Bold Red**

```

1  MHVQSLLLAS  GLVPLAASQG  CPFAKRATDT  NLVPPREIPE  DFGICRVASN
51  QAGGGTRSRD  FWPCALRLDV  LRQFSPPYNP  LGADFDYTEA  FKSLDFAALK
101 KDLNALLTDS  QDWWPADHGN  YGGLFIRMSW  HSAGTYRAMD  GRGGSGMGQQ
151 RFAPLDSWPD  NQNLDKARRL  LWPIKQKYGS  KISWADLMVL  AGNVALEHSG
201 FETLGFAGGR  ADTWEADESI  YWGAESTFVP  KGNDVRYNGS  TDIYERADKL
251 EKPLGATHFG  LIYVNPEGPD  GSSDPKASAL  DIRTAFGRMG  MDDEETAALI
301 IGGHTLGKTH  GAVPAKNIGP  EPMAADLGEM  GLGWHNSVNE  GNGPDQMTSG
351 LEVIWSTTPT  KWSNHFLKSL  LGNNWTLVES  PAGHKQWEAL  NGKLEYPPDF
401 VKGKFRPTM  LTSDLALIND  PSYLKICKRW  HDNPKELNAA  FARAWYKLLH
451 RDLGPVSRYL  GPEVAKEKFI  WQDPLPERKG  DIIGEADISS  LKSAILSADG
501 LDVSKLVSTA  WNSASTFRGT  DKRGGANGAR  IALEPQVNWV  SNNPKQLKQV
551 LSALKKVQKD  FNSKSGSKKV  SLADLIVLGG  VAAIEKAAQA  AGFKDVEVPE
601 TPGRVDATQN  QTDLVQFGYL  EPLADGFRNY  GHGTARARTE  EILVDRAALL
651 TLTPPEMTVL  VGGLRALNAN  YDGSSNGILT  EKKGQLTNDF  FVNLLSPAYS
701 WAKKDSQGEL  WTGTDRATKS  VKWTATRADL  VFGSHAELRA  ISEVYGSADA
751 KEKFKDFIS  AWTKVMNLDR  FDVKAEK

```

Matched peptides information:

| Start - End | Observed  | Mr (expt) | Mr (calc) | ppm   | M | Peptide                                  |
|-------------|-----------|-----------|-----------|-------|---|------------------------------------------|
| 27 - 36     | 1083.6983 | 1082.6910 | 1082.5720 | 110   | 0 | R.ATDTNLVFFR.E                           |
| 37 - 46     | 1235.7349 | 1234.7276 | 1234.5652 | 132   | 0 | R.EIPEDFOICR.V                           |
| 47 - 57     | 1017.6541 | 1016.6468 | 1016.4999 | 145   | 0 | R.VASHQAGGOTR.S                          |
| 60 - 67     | 1064.6431 | 1063.6358 | 1063.4909 | 136   | 0 | R.DFWPCALR.L                             |
| 68 - 72     | 615.5136  | 614.5063  | 614.3752  | 213   | 0 | R.LDVL <del>R</del> .Q                   |
| 73 - 92     | 2307.0814 | 2306.0741 | 2306.0532 | 9.09  | 0 | R.QFSPPYNPLGADFDYTEAFK.S                 |
| 102 - 127   | 2974.3414 | 2973.3341 | 2973.4046 | -23.7 | 0 | K.DLNALLTDSQDWWPADHGNVYOGLFIR.M          |
| 143 - 151   | 877.5025  | 876.4953  | 876.3872  | 123   | 0 | R.GGSGMQQR.F                             |
| 143 - 151   | 893.4499  | 892.4426  | 892.3821  | 67.8  | 0 | R.GGSGMQQR.F + Oxidation (O)             |
| 152 - 166   | 1759.8306 | 1758.8233 | 1758.8213 | 1.15  | 0 | R.FAPLDSHFDNQNLDK.A                      |
| 211 - 231   | 2402.0773 | 2401.0700 | 2401.0750 | -2.08 | 0 | R.ADTWEADESIYWGAESTFVPE.G                |
| 237 - 246   | 1217.7330 | 1216.7257 | 1216.5360 | 156   | 0 | R.YNGSTDIYER.A                           |
| 277 - 283   | 745.4472  | 744.4399  | 744.4130  | 36.2  | 0 | K.ASALDIR.T                              |
| 284 - 288   | 551.1975  | 550.1902  | 550.2863  | -175  | 0 | R.TAFGR.M                                |
| 394 - 402   | 1107.6843 | 1106.6770 | 1106.5648 | 101   | 0 | K.LEYDFPVE.K                             |
| 407 - 425   | 2148.1275 | 2147.1202 | 2147.1296 | -4.37 | 0 | R.RPTMLTSDLALINDPSYLK.I                  |
| 407 - 425   | 2164.1287 | 2163.1214 | 2163.1245 | -1.43 | 0 | R.RPTMLTSDLALINDPSYLK.I + Oxidation (O)  |
| 436 - 443   | 891.5706  | 890.5633  | 890.4610  | 115   | 0 | K.ELNAAFAR.A                             |
| 436 - 447   | 1439.8640 | 1438.8567 | 1438.7357 | 84.1  | 1 | K.ELNAAFARAWYK.L                         |
| 469 - 478   | 1300.8349 | 1299.8276 | 1299.6612 | 128   | 0 | K.FIWQDPLPER.K                           |
| 469 - 479   | 1428.8909 | 1427.8836 | 1427.7561 | 89.3  | 1 | K.FIWQDPLPERK.G                          |
| 480 - 492   | 1317.8960 | 1316.8887 | 1316.6823 | 157   | 0 | K.GDIIGEADISSLK.S                        |
| 531 - 545   | 1708.8793 | 1707.8720 | 1707.8944 | -13.1 | 0 | R.IALEPQVNVSNPK.Q                        |
| 569 - 586   | 1796.0385 | 1795.0312 | 1795.0819 | -28.2 | 1 | K.KVSLADLIVLGGVAAIEK.A                   |
| 570 - 586   | 1667.9806 | 1666.9733 | 1666.9869 | -8.15 | 0 | K.VSLADLIVLGGVAAIEK.A                    |
| 587 - 604   | 1860.8967 | 1859.8894 | 1859.9530 | -34.2 | 1 | K.AAQAGFEDVEVFFTPGR.V                    |
| 595 - 604   | 1116.7027 | 1115.6954 | 1115.5611 | 120   | 0 | K.DVEVFFTPGR.V                           |
| 605 - 628   | 2697.3005 | 2696.2932 | 2696.3082 | -5.56 | 0 | R.VDATQNTD <del>LVQ</del> FOYLEPLADGFR.N |
| 629 - 636   | 875.5100  | 874.5027  | 874.4046  | 112   | 0 | R.NYGHOTAR.A                             |
| 637 - 646   | 1201.7845 | 1200.7772 | 1200.6462 | 109   | 1 | R.ARTEIIVDR.A                            |
| 639 - 646   | 974.5810  | 973.5737  | 973.5080  | 67.5  | 0 | R.TEEIIVDR.A                             |
| 647 - 665   | 1952.1036 | 1951.0963 | 1951.1176 | -10.9 | 0 | R.AALLTLTPPEMTVLVQGLR.A                  |
| 647 - 665   | 1968.1019 | 1967.0946 | 1967.1125 | -9.10 | 0 | R.AALLTLTPPEMTVLVQGLR.A + Oxidation (O)  |
| 704 - 716   | 1492.8115 | 1491.8042 | 1491.6954 | 73.0  | 1 | K.KDSQGLMTOTDR.A                         |
| 705 - 716   | 1364.7727 | 1363.7654 | 1363.6004 | 121   | 0 | K.DSQGLMTOTDR.A                          |
| 723 - 727   | 634.4462  | 633.4389  | 633.3235  | 182   | 0 | K.MTATR.A                                |
| 728 - 739   | 1314.8647 | 1313.8574 | 1313.6728 | 141   | 0 | R.ADLVFGSHAELR.A                         |
| 757 - 764   | 967.5294  | 966.5222  | 966.4811  | 42.5  | 0 | K.DFISAWFK.V                             |
| 765 - 774   | 1236.8832 | 1235.8759 | 1235.6332 | 196   | 1 | K.VSNLDRFDVKE.A                          |

Spot No.: **89**

Mascot score: **314**

Species: *Fusarium oxysporum f. sp. cubense race 4*

Protein name: **Catalase-peroxidase 2**

NCBI accession No.: **gi| 475672437**      Sequence coverage %: **48**

Matched peptides No.: **39**      Total peptides No.: **61**

Calculated Mr: **85233**      Calculated pI: **6.57**

### Annotated PMF spectra:

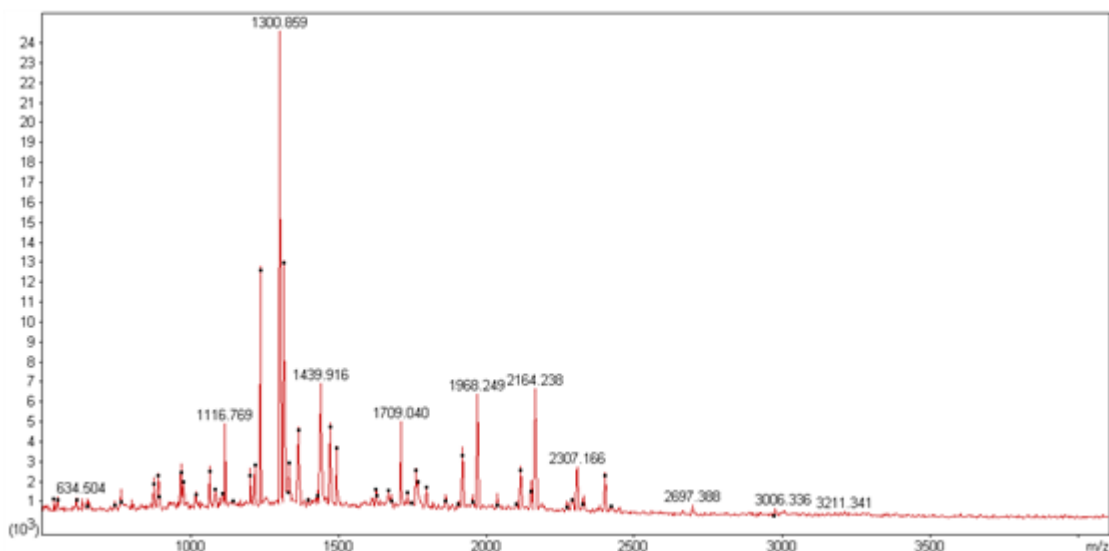

### Probability Based Mowse Score:

Protein score is  $-10 \cdot \log(P)$ , where P is the probability that the observed match is a random event. Protein scores greater than 75 are significant ( $p < 0.05$ ).

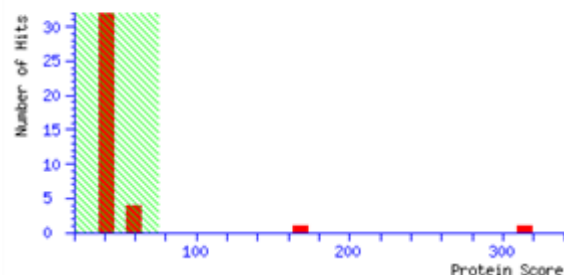

Matched peptide sequences: shown in **Bold Red**

1 MHVQSLLLLAS GLVPLAASQG CFFAKRATDT **NLVPPREIPE DFGICRVASN**  
 51 **QAGGGTRSRD FWPCALRLDV LRQFSPPYNP LGADFDYTEA FKSLDFAALK**  
 101 **KDLNALLTDS QDWWPADHGN YGGLFIRMSW HSAGTYRAMD GRGGSGMGQQ**  
 151 **RFAPLDSWPD NQNLDKARRL LWPIKQKYGS KISWADLMVL AGNVALEHSG**  
 201 **FETLGFAGGR ADTWEADESI YWGAESTFVP KGNDVRVNGS TDIYERADKL**  
 251 **EKPLGATHFG LIYVNPEGPD GSSDPKASAL DIRTAFGRMG MDDEETAALI**  
 301 **IGGHTLGKTH GAVPAKNIGP EPMAADLGEM GLGWHNSVNE GNGPDQMTSG**  
 351 **LEVIWSTTPT KWSNHFLKSL LGNNWTLVES PAGHKQWEAL NGKLEYPDPF**  
 401 **VKGKFRPTM LTSDLALIND PSYLKICKRW HDNPKELNAA FARAWYKLLH**  
 451 **RDLGPVSRYL GPEVAKEKFI WQDPLPERKG DIIGEADISS LKSAILSADG**  
 501 **LDVSKLVSTA WNSASTFRGT DKRGGANGAR IALEPQVNWV SNNPKQLKQV**  
 551 **LSALKKVQKD FNSKSGSKKV SLADLIVLGG VAAIEKAAQA AGFKDVEVPF**  
 601 **TPGRVDATQN QTDLVQFGYL EPLADGFRNY GHGTARARTE EILVDRAALL**  
 651 **TLTPPEMTVL VGGLRALNAN YDGSSNGILT EKKGQLTND FVNLLSPAYS**  
 701 **WAKKDSQGEL WTGTDRAKTS VKWTATRADL VFGSHAELRA ISEVYGSADA**  
 751 **KEKFKDFIS AWTKVMNLDR FDVKAEK**

Matched peptides information:

| Start - End | Observed  | Mr (expt) | Mr (calc) | ppm  | M | Peptide                                 |
|-------------|-----------|-----------|-----------|------|---|-----------------------------------------|
| 27 - 36     | 1083.7479 | 1082.7406 | 1082.5720 | 156  | 0 | R.ATDTNLVPPR.E                          |
| 37 - 46     | 1235.7670 | 1234.7597 | 1234.5632 | 158  | 0 | R.EIPEDFGICR.V                          |
| 47 - 57     | 1017.7138 | 1016.7065 | 1016.4999 | 203  | 0 | R.VASNQAQGGTR.S                         |
| 60 - 67     | 1064.6957 | 1063.6884 | 1063.4909 | 186  | 0 | R.DFMPALR.L                             |
| 68 - 72     | 615.5299  | 614.5226  | 614.3752  | 240  | 0 | R.LDVLR.Q                               |
| 73 - 92     | 2307.1662 | 2306.1589 | 2306.0532 | 45.9 | 0 | R.QFSPPYNP LGADFDYTEAFK.S               |
| 102 - 127   | 2974.4704 | 2973.4631 | 2973.4046 | 19.7 | 0 | K.DLNALLTDSQDWWPADHGNVYGLFIR.M          |
| 143 - 151   | 893.5427  | 892.5354  | 892.3821  | 172  | 0 | R.GOSMOQQR.F + Oxidation (O)            |
| 152 - 166   | 1759.9623 | 1758.9550 | 1758.8213 | 76.0 | 0 | R.FAPLDSWPDNQNLDK.A                     |
| 211 - 231   | 2402.1893 | 2401.1820 | 2401.0750 | 44.6 | 0 | R.ADTWEADESIYWGAESTFVVK.G               |
| 237 - 246   | 1217.7515 | 1216.7442 | 1216.5360 | 171  | 0 | R.YNOSTDIYER.A                          |
| 277 - 283   | 745.5842  | 744.5769  | 744.4130  | 220  | 0 | K.ASALDIR.T                             |
| 284 - 288   | 551.4576  | 550.4504  | 550.2863  | 298  | 0 | R.TAFGR.M                               |
| 386 - 402   | 2034.1669 | 2033.1596 | 2033.0258 | 65.8 | 1 | K.QWEALNGKLEYPDPFVK.G                   |
| 394 - 402   | 1107.7698 | 1106.7625 | 1106.5648 | 179  | 0 | K.LEYDFVVK.G                            |
| 407 - 425   | 2148.2741 | 2147.2668 | 2147.1296 | 63.9 | 0 | R.RPTMLTSDLALINDPSYLK.I                 |
| 407 - 425   | 2164.2382 | 2163.2309 | 2163.1245 | 49.2 | 0 | R.RPTMLTSDLALINDPSYLK.I + Oxidation (O) |
| 436 - 443   | 891.6639  | 890.6566  | 890.4610  | 220  | 0 | K.ELNAAFAR.A                            |
| 436 - 447   | 1439.9163 | 1438.9090 | 1438.7357 | 120  | 1 | K.ELNAAFARAMYK.L                        |
| 448 - 451   | 538.4916  | 537.4844  | 537.3387  | 271  | 0 | K.LLHR.D                                |
| 469 - 478   | 1300.8591 | 1299.8518 | 1299.6612 | 147  | 0 | K.FINQDFPER.K                           |
| 469 - 479   | 1428.9318 | 1427.9245 | 1427.7561 | 118  | 1 | K.FINQDFPERK.G                          |
| 531 - 545   | 1709.0399 | 1708.0326 | 1707.8944 | 80.9 | 0 | R.IALEPQVNWVSNNPK.Q                     |
| 569 - 586   | 1796.2117 | 1795.2044 | 1795.0819 | 68.3 | 1 | K.KVSLADLIVLGGVAAIEK.A                  |
| 570 - 586   | 1668.1021 | 1667.0948 | 1666.9869 | 64.7 | 0 | K.VSLADLIVLGGVAAIEK.A                   |
| 587 - 604   | 1861.0738 | 1860.0665 | 1859.9530 | 61.0 | 1 | K.AAQAGPKDVEVFPTPOR.V                   |
| 595 - 604   | 1116.7692 | 1115.7619 | 1115.5611 | 180  | 0 | K.DVEVFPTPOR.V                          |
| 605 - 628   | 2697.3880 | 2696.3807 | 2696.3082 | 26.9 | 0 | R.VDATQNTDLVQFOYLEPLADGFR.N             |
| 629 - 636   | 875.6029  | 874.5956  | 874.4046  | 219  | 0 | R.NYGHGTAR.A                            |
| 637 - 646   | 1201.8179 | 1200.8106 | 1200.6462 | 137  | 1 | R.ARTEEILVDR.A                          |
| 639 - 646   | 974.6950  | 973.6877  | 973.5080  | 185  | 0 | R.TEEILVDR.A                            |
| 647 - 665   | 1952.2371 | 1951.2298 | 1951.1176 | 57.5 | 0 | R.AALLTLTPPEMTVLVQGLR.A                 |
| 647 - 665   | 1968.2491 | 1967.2418 | 1967.1125 | 65.7 | 0 | R.AALLTLTPPEMTVLVQGLR.A + Oxidation (O) |
| 704 - 716   | 1492.8706 | 1491.8633 | 1491.6954 | 113  | 1 | K.KDSQGLMTGDR.A                         |
| 705 - 716   | 1364.8034 | 1363.7961 | 1363.6004 | 144  | 0 | K.DSQGLMTGDR.A                          |
| 723 - 727   | 634.5036  | 633.4963  | 633.3235  | 273  | 0 | K.WTATR.A                               |
| 728 - 739   | 1314.8818 | 1313.8745 | 1313.6728 | 154  | 0 | R.ADLVFGSHAELR.A                        |
| 752 - 756   | 650.2174  | 649.2101  | 649.3799  | -261 | 1 | K.EKFK.D                                |
| 757 - 764   | 967.6236  | 966.6163  | 966.4811  | 140  | 0 | K.DFISANTK.V                            |

Spot No.: **90**

Mascot score: **236**

Species: *Fusarium oxysporum f. sp. cubense race 4*

Protein name: **Catalase-peroxidase 2**

NCBI accession No.: **gi| 475672437**      Sequence coverage %: **42**

Matched peptides No.: **33**      Total peptides No.: **61**

Calculated Mr: **85233**      Calculated pI: **6.57**

### Annotated PMF spectra:

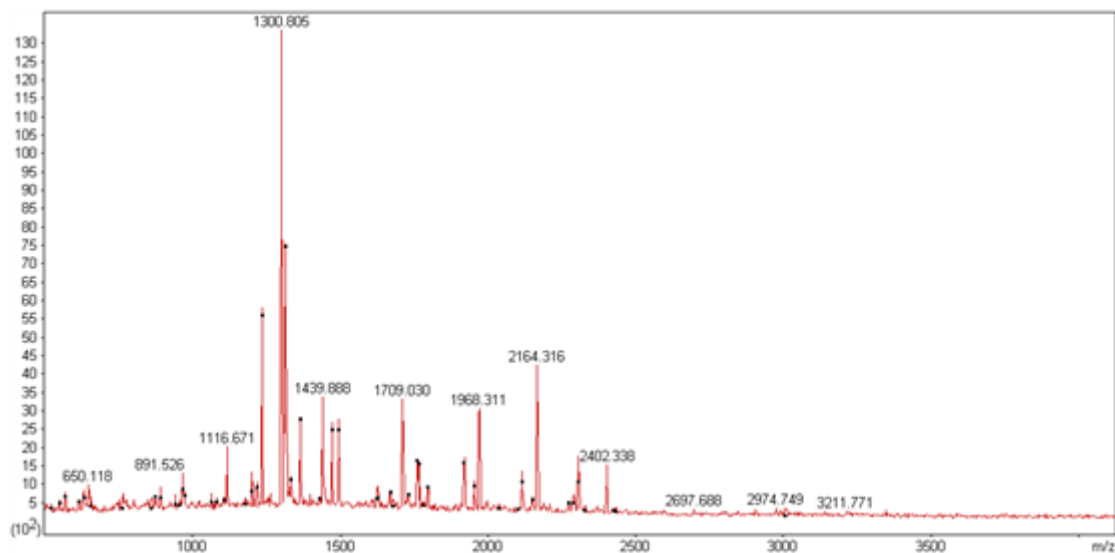

### Probability Based Mowse Score:

Protein score is  $-10 \cdot \log(P)$ , where P is the probability that the observed match is a random event. Protein scores greater than 75 are significant ( $p < 0.05$ ).

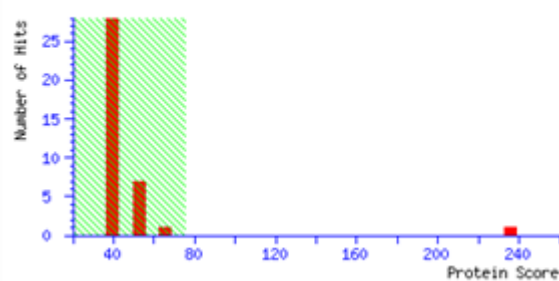

Matched peptide sequences: shown in **Bold Red**

```

1  MHVQSLLLAS  GLVPLAASQG  CPFAKRATDT  NLVPPREIPE  DFGICRVASN
51  QAGGGTRSRD  FWPCALRLDV  LRQFSPPYNP  LGADFDYTEA  FKSLDFAALK
101 KDLNALLTDS  QDWWPADHGN  YGGLFIRMSW  HSAGTYRAMD  GRGGSGMGQQ
151 RFAPLDSWPD  NQNLDKARRL  LWPIKQKYGS  KISWADLMVL  AGNVALEHSG
201 FETLGFAGGR  ADTWEADESI  YWGAESETFVP  KGNDVRYNGS  TDIYERADKL
251 EKPLGATHFG  LIYVNPEGPD  GSSDPKASAL  DIRTAFGRMG  MDDEETAALI
301 IGGHTLGKTH  GAVPAKNIGP  EPMAADLGEM  GLGWHNSVNE  GNGPDQMTSG
351 LEVIWSTTPT  KWSNHFLKSL  LGNNWTLVES  PAGHKQWEAL  NGKLEYPDFP
401 VKGFRRPTM  LTSDLALIND  PSYLKICKRW  HDNPKELNAA  FARAWYKLLH
451 RDLGPVSRYL  GPEVAKEKFI  WQDPLPERKG  DIIGEADISS  LKSAILSADG
501 LDVSKLVSTA  WNSASTFRGT  DKRGGANGAR  IALEPQVNWV  SNNPKQLKQV
551 LSALKKVQKD  FNSKSGSKKV  SLADLIVLGG  VAAIEKAAQA  AGFKDVEVPF
601 TPGRVDATQN  QTDLVQFGYL  EPLADGFRNY  GHGTARARTE  EILVDRAALL
651 TLTPPEMTVL  VGGLRALNAN  YDGSSNGILT  EKKGQLTNDF  FVNLLSPAYS
701 WAKKDSQGEL  WTGTDRATKS  VKWTATRADL  VFGSHAELRA  ISEVYGSADA
751 KEKFVKDFIS  AWTKVMNLDR  FDVKAEK

```

Matched peptides information:

| Start | End | Observed  | Fr (expt) | Fr (ref)  | ppm    | H | Peptide                                         |
|-------|-----|-----------|-----------|-----------|--------|---|-------------------------------------------------|
| 27    | 38  | 1083.6377 | 1082.6304 | 1082.6720 | 83.9   | 0 | R.AYDMLVPPR.E                                   |
| 37    | 48  | 1235.6968 | 1234.6893 | 1234.5652 | 101.0  | 0 | R.EIREFFOICR.V                                  |
| 40    | 47  | 1064.6206 | 1063.6133 | 1063.4909 | 115.0  | 0 | R.DVPCALR.L                                     |
| 88    | 72  | 615.3795  | 614.3722  | 614.3752  | -4.85  | 0 | R.LDYLR.Q                                       |
| 73    | 82  | 2307.3063 | 2306.2990 | 2306.0932 | 107.0  | 0 | R.QFSPYVPLGAEFDYEA <b>K</b> .S                  |
| 102   | 127 | 2974.7491 | 2973.7418 | 2973.4046 | 113.0  | 0 | R.QSKLLTDSQDNFADKNGYQGLER.H                     |
| 143   | 151 | 893.3922  | 892.3849  | 892.3821  | 3.11   | 0 | R.GGGGHOQGR.Y + Oxidation: O0                   |
| 152   | 166 | 1759.9803 | 1758.9730 | 1758.8213 | 86.3   | 0 | R.FAPLDSWVHQHLE.A                               |
| 211   | 231 | 2402.3377 | 2401.3304 | 2401.0750 | 108.0  | 0 | R.ADTWEADESIYWGAESETFV <b>VE</b> .G             |
| 237   | 246 | 1217.6718 | 1216.6705 | 1216.5360 | 111.0  | 0 | R.YHGSTDIYER.A                                  |
| 284   | 288 | 551.3557  | 550.3485  | 550.2063  | 113.0  | 0 | R.TATGR.H                                       |
| 394   | 402 | 1107.6227 | 1106.6154 | 1106.5648 | 49.7   | 0 | R.LEYHGFYK.G                                    |
| 437   | 425 | 2148.3478 | 2147.3405 | 2147.1296 | 99.2   | 0 | R.SPTHLTSDIALINDP <b>SYL</b> .I                 |
| 407   | 425 | 2164.3156 | 2163.3083 | 2163.1245 | 85.0   | 0 | R.SPTHLTSDIALINDP <b>SYL</b> .I + Oxidation: O0 |
| 436   | 443 | 891.5257  | 890.5185  | 890.4610  | 64.8   | 0 | R.EUAAAFAR.A                                    |
| 436   | 447 | 1439.8880 | 1438.8807 | 1438.7337 | 101.1  | 1 | R.EUAAAFARAWYK.L                                |
| 463   | 478 | 1300.8052 | 1299.7979 | 1299.6612 | 105.0  | 0 | R.FVWQDPLPER.E                                  |
| 469   | 479 | 1426.8894 | 1427.8821 | 1427.7861 | 89.3   | 1 | R.FVWQDPLPERK.G                                 |
| 531   | 545 | 1709.0297 | 1708.0224 | 1707.8344 | 75.0   | 0 | R.IALEPQVNWV <b>SHQ</b> PE.G                    |
| 569   | 586 | 1796.2221 | 1795.2148 | 1795.0819 | 74.1   | 1 | R.KVSLADLVLOGVA <b>AEK</b> .A                   |
| 570   | 586 | 1668.1369 | 1667.1296 | 1666.9869 | 89.8   | 0 | R.VSLADLVLOGVA <b>AEK</b> .A                    |
| 590   | 604 | 1116.6711 | 1115.6638 | 1115.5611 | 92.0   | 0 | R.DVEVFF <b>Y</b> QGR.V                         |
| 605   | 628 | 2697.6879 | 2696.6806 | 2696.3082 | 139.0  | 0 | R.VDATGQTDLVQFOYLEFADQ <b>FR</b> .H             |
| 629   | 636 | 875.4841  | 874.4768  | 874.4046  | 82.7   | 0 | R.HYGNATAR.A                                    |
| 637   | 646 | 1201.7272 | 1200.7199 | 1200.6462 | 61.4   | 1 | R.ARTIELVDR.A                                   |
| 639   | 646 | 974.5279  | 973.5206  | 973.5080  | 13.0   | 0 | R.TEELVDR.A                                     |
| 647   | 665 | 1982.3297 | 1981.3224 | 1981.1576 | 105.0  | 0 | R.AALLLTPPEMTVL <b>QGL</b> E.A                  |
| 647   | 665 | 1968.3114 | 1967.3041 | 1967.1125 | 97.4   | 0 | R.AALLLTPPEMTVL <b>QGL</b> E.A + Oxidation: O0  |
| 704   | 716 | 1492.8794 | 1491.8721 | 1491.6954 | 118.1  | 1 | R.KSQGELMT <b>Q</b> DR.A                        |
| 705   | 716 | 1364.7804 | 1363.7731 | 1363.6004 | 127.0  | 0 | R.DSQGELMT <b>Q</b> DR.A                        |
| 723   | 727 | 634.2480  | 633.2408  | 633.3235  | -131.0 | 0 | R.VTATR.A                                       |
| 728   | 739 | 1314.8139 | 1313.8066 | 1313.6728 | 102.0  | 0 | R.ADLVFG <b>SHAE</b> LRA.A                      |
| 757   | 764 | 967.4975  | 966.4902  | 966.4811  | 9.45   | 0 | R.DFIAHWYK.V                                    |



Spot No.: **91**

Mascot score: **86**

Species: *Fusarium oxysporum f. sp. cubense race 1*

Protein name: **I-amino acid oxidase**

NCBI accession No.: **gi| 477517233**      Sequence coverage %: **26**

Matched peptides No.: **19**      Total peptides No.: **64**

Calculated Mr: **67814**      Calculated pI: **5.69**

### Annotated PMF spectra:

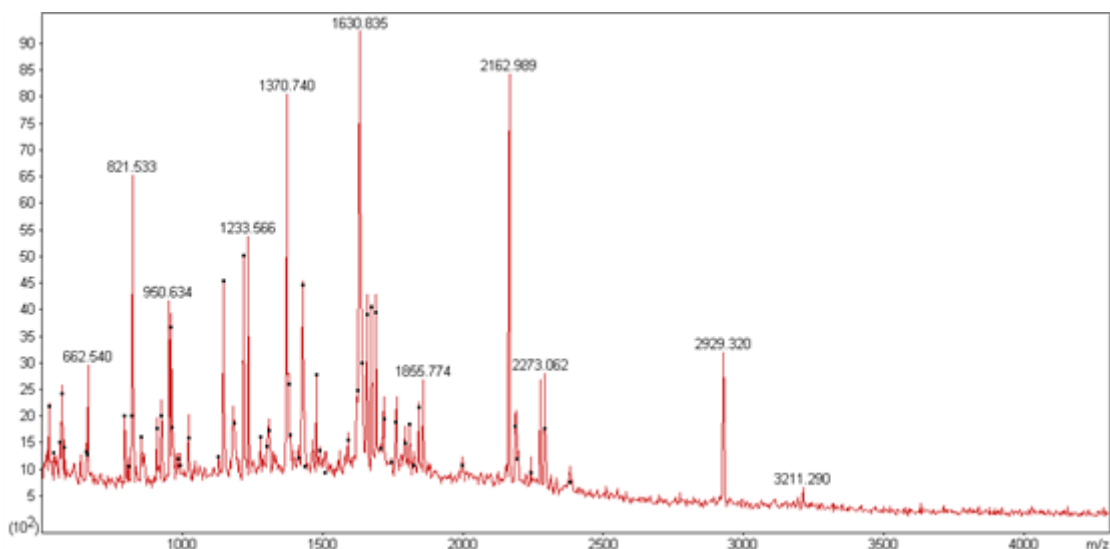

### Probability Based Mowse Score:

Protein score is  $-10 \cdot \log(P)$ , where P is the probability that the observed match is a random event. Protein scores greater than 75 are significant ( $p < 0.05$ ).

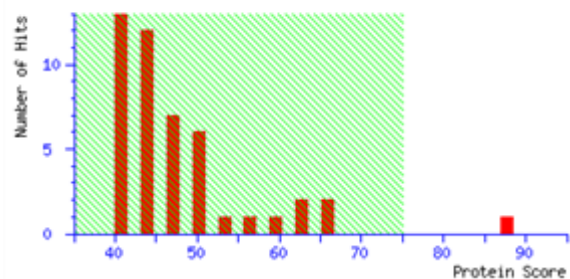

## Matched peptide sequences: shown in **Bold Red**

```

1  MVKFTDEPWG ASVLVLLFLS NAHGTKLPLK AQQTHLCADK PQMQNFDSVG
51 AWFDDVAKLN CTSVSKAPNA SIAIVGGGVS GLTTALMLDS IGLHNWDIIE
101 ASDRVGGRFR TKFVGGTKEF AEMGPMRLPY TVTYKSDNST YEYTEHRLTF
151 QLAETLNEMN GNDSKWKVDF ISWIQHHPNE LIAWGTGRHP DGRIPTADI
201 HANSSLGKPP AIVSTEYNET KHRMNEILKN ETMLKAIQAD VWRSHKFVMS
251 QGYDDWSEQC MMREAFHASE NITDAIWTAT DYDVVWDEM V HNSNLALDGT
301 KDSLGETEWK CVDGGFNRLT DAFIPHVSDR LVLNRKIGKL ESVKGEDGQT
351 QIRLSWYPSV KNRTFESKDY DYTIMAVPFT MTRFMALPSF SSVLGRAISE
401 AGLRFKSACK VSLLFSERFW EKGERPIFGG YSIPESRPIG ALYYPVYGLN
451 ESRPGLITHY RGGDWSDRYV SFSDEEHVQT VLDIVSLHG EQARELYTGD
501 YERLCWLQDE HTATSWCRPD VEQHNLYIPA YHQTEHNTIF IGEHTAPTQA
551 WISSAIYSAA RTIQLLLEL GMVEEAK EIN RRWMGRWIRD ETKP

```

## Matched peptides information:

| Start - End | Observed  | Mr(expt)  | Mr(calc)  | ppm   | M | Peptide                               |
|-------------|-----------|-----------|-----------|-------|---|---------------------------------------|
| 113 - 127   | 1656.7789 | 1655.7716 | 1655.7800 | -5.05 | 1 | K.FVOGTEFAEMGPMR.L                    |
| 113 - 127   | 1672.7169 | 1671.7096 | 1671.7749 | -39.0 | 1 | K.FVOGTEFAEMGPMR.L + Oxidation (0)    |
| 113 - 127   | 1688.7081 | 1687.7008 | 1687.7698 | -40.9 | 1 | K.FVOGTEFAEMGPMR.L + 2 Oxidation (0)  |
| 128 - 135   | 984.5974  | 983.5901  | 983.5328  | 58.3  | 0 | R.LPYTVTYK.S                          |
| 236 - 243   | 958.5856  | 957.5784  | 957.5032  | 78.5  | 0 | K.AIQADVNR.S                          |
| 311 - 318   | 924.4823  | 923.4751  | 923.3920  | 90.0  | 0 | K.CVDGGFNR.L                          |
| 319 - 330   | 1370.7400 | 1369.7327 | 1369.6990 | 24.6  | 0 | R.LTDAFIPHVSDR.L                      |
| 369 - 383   | 1839.8032 | 1838.7959 | 1838.8219 | -14.1 | 0 | K.DYDVTIMAVPFTMTR.F + Oxidation (0)   |
| 369 - 383   | 1855.7742 | 1854.7669 | 1854.8168 | -26.9 | 0 | K.DYDVTIMAVPFTMTR.F + 2 Oxidation (0) |
| 384 - 396   | 1411.7705 | 1410.7632 | 1410.7330 | 21.5  | 0 | R.FMALPSFSSVLOR.A                     |
| 384 - 396   | 1427.7428 | 1426.7355 | 1426.7279 | 5.36  | 0 | R.FMALPSFSSVLOR.A + Oxidation (0)     |
| 397 - 404   | 816.5812  | 815.5739  | 815.4501  | 152   | 0 | R.AISEAGLR.F                          |
| 411 - 418   | 950.6344  | 949.6271  | 949.5233  | 109   | 0 | K.VSLLFSER.F                          |
| 462 - 468   | 792.4645  | 791.4572  | 791.3198  | 174   | 0 | R.GGDWSDR.Y                           |
| 469 - 494   | 2929.3199 | 2928.3126 | 2928.4254 | -38.5 | 0 | R.YVSPSDEEHVQTVLDIVSLHGEQAR.E         |
| 495 - 503   | 1145.5776 | 1144.5703 | 1144.5036 | 58.3  | 0 | R.ELYTDYER.L                          |
| 562 - 577   | 1743.8093 | 1742.8020 | 1742.9488 | -84.2 | 0 | R.GTIQLLLELGMVEEAK.E                  |
| 562 - 577   | 1759.8664 | 1758.8591 | 1758.9437 | -48.1 | 0 | R.GTIQLLLELGMVEEAK.E + Oxidation (0)  |
| 583 - 589   | 1020.5305 | 1019.5232 | 1019.5123 | 10.7  | 1 | R.WMGRWIR.D + Oxidation (0)           |

Spot No.: **92**

Mascot score: **250**

Species: *Fusarium oxysporum f. sp. cubense race 4*

Protein name: **Catalase-peroxidase 2**

NCBI accession No.: **gi| 475672437**      Sequence coverage %: **49**

Matched peptides No.: **41**      Total peptides No.: **87**

Calculated Mr: **85233**      Calculated pI: **6.57**

### Annotated PMF spectra:

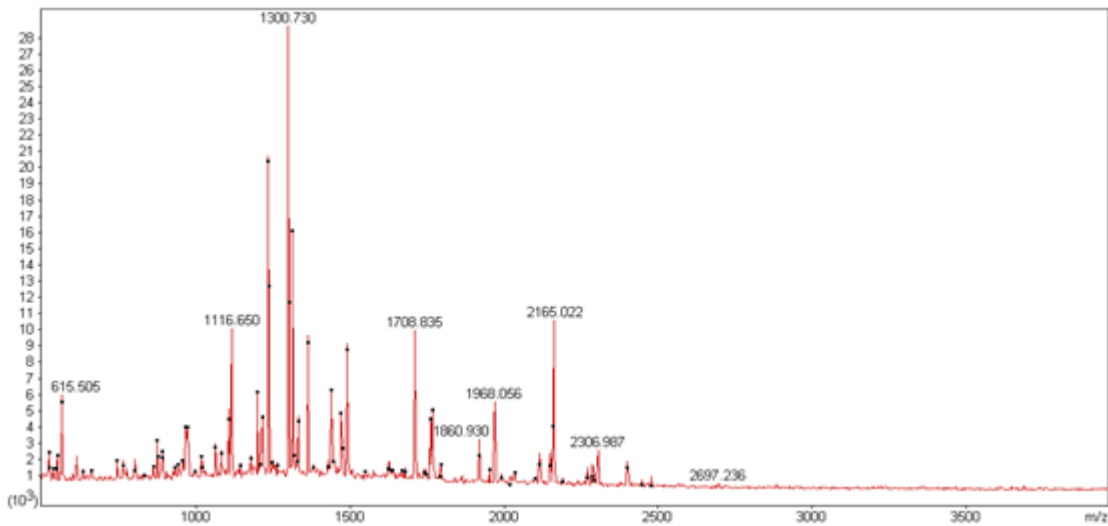

### Probability Based Mowse Score:

Protein score is  $-10 \cdot \log(P)$ , where P is the probability that the observed match is a random event. Protein scores greater than 75 are significant ( $p < 0.05$ ).

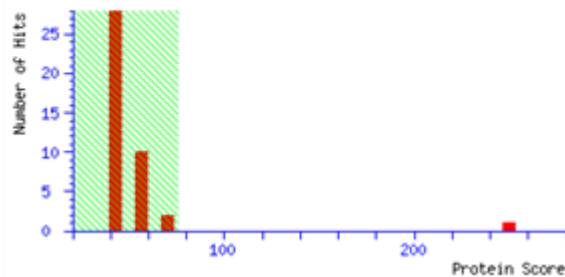

## Matched peptide sequences: shown in **Bold Red**

```

1  MHVQSLLLAS GLVPLAASQG CPFAKRATDT NLVPPREIPE DFGICRVASN
51 QAGGGTRSRD FWPCALRLDV LRQFSPYPNP LGADFDYTEA FKSLDFAALK
101 KDLNALLTDS QDWWPADHGN YGGLFIRMSW HSAGTYRAMD GRGGSGMGQQ
151 RFAPLDSPD NQNLDKARRL LWPIKQKYGS KISWADLMVL AGNVALEHSG
201 FETLGFAGGR ADTWEADESI YWGAESTFVP KGNDVRYNGS TDIYERADKL
251 EKPLGATHFG LIYVNPEGPD GSSDPKASAL DIRTAFGRMG MDDEETAALI
301 IGGHTLGKTH GAVPAKNIGP EPMAADLGEM GLGWHNSVNE GNGPDQMTSG
351 LEVIWSTTPT KWSNHFLKSL LGNNWTLVES PAGHKQWEAL NGKLEYPDPF
401 VKGKFRPTM LTSDLALIND PSYLKICKRW HDNPKELNAA FARAWYKLLH
451 RDLGPVSRYL GPEVAKEKFI WQDPLPERKG DIIGEADISS LKSAILSADG
501 LDVSKLVSTA WNSASTFRGT DKRGGANGAR IALEPQVNWV SNNPKQLKQV
551 LSALKKVQKD FNSKSGSKKV SLADLIVLGG VAAIEKAAQA AGFKDVEVPF
601 TPGRVDATQN QTDLVQFGYL EPLADGFRNY GHGTARARTE EILVDRAALL
651 TLTPPEMTVL VGGLRALNAN YDGSSNGILT EKKGQLTNDF FVNLLSPAYS
701 WAKKDSQGEL WTGTDRATKS VKWTATRADL VFGSHAELRA ISEVYGSADA
751 KEKFVKDFIS AWTKVMNLDR FDKVKAEK

```

## Matched peptides information:

| Start - End | Observed  | Mr (expt) | Mr (calc) | ppm   | M | Peptide                                 |
|-------------|-----------|-----------|-----------|-------|---|-----------------------------------------|
| 27 - 36     | 1083.6332 | 1082.6259 | 1082.5720 | 49.8  | 0 | R.AYDTNLVPPR.E                          |
| 37 - 46     | 1235.6343 | 1234.6270 | 1234.5652 | 50.1  | 0 | R.EIPEDFGICR.V                          |
| 47 - 57     | 1017.5933 | 1016.5860 | 1016.4999 | 84.7  | 0 | R.VASNQAOOQTR.S                         |
| 60 - 67     | 1064.5898 | 1063.5825 | 1063.4909 | 86.1  | 0 | R.DFWPCALR.L                            |
| 68 - 72     | 615.5055  | 614.4982  | 614.3752  | 200   | 0 | R.LDVLR.Q                               |
| 73 - 92     | 2306.9875 | 2305.9802 | 2306.0532 | -31.6 | 0 | R.QFSPPYNPLGADFDYTEAFK.S                |
| 93 - 100    | 864.5270  | 863.5197  | 863.4752  | 51.5  | 0 | K.SLDFAALK.K                            |
| 143 - 151   | 877.4938  | 876.4866  | 876.3872  | 113   | 0 | R.GGSGMQQR.F                            |
| 143 - 151   | 893.4635  | 892.4562  | 892.3821  | 83.0  | 0 | R.GGSGMQQR.F + Oxidation (8)            |
| 152 - 166   | 1759.7790 | 1758.7717 | 1758.8213 | -28.2 | 0 | R.FAPLDSWPDNQLDK.A                      |
| 211 - 231   | 2401.9719 | 2400.9646 | 2401.0750 | -46.0 | 0 | R.ADTWEADESIYWGAE <del>ST</del> FVVK.G  |
| 237 - 246   | 1217.6057 | 1216.5984 | 1216.5360 | 51.3  | 0 | R.YNGSTDIYER.A                          |
| 277 - 283   | 745.5402  | 744.5329  | 744.4130  | 161   | 0 | K.ASALDIR.T                             |
| 284 - 288   | 551.4124  | 550.4051  | 550.2863  | 216   | 0 | R.TAFGR.M                               |
| 362 - 368   | 931.5517  | 930.5444  | 930.4712  | 78.7  | 0 | K.WSNHFLK.S                             |
| 394 - 402   | 1107.6134 | 1106.6061 | 1106.5648 | 37.3  | 0 | K.LEYDPDFVK.G                           |
| 407 - 425   | 2148.0167 | 2147.0094 | 2147.1296 | -56.0 | 0 | R.RPTMLTSDLALINDPSYLK.I                 |
| 436 - 443   | 891.5399  | 890.5327  | 890.4610  | 80.5  | 0 | K.ELNAAFAR.A                            |
| 436 - 447   | 1439.7660 | 1438.7587 | 1438.7357 | 16.0  | 1 | K.ELNAAFARAYK.L                         |
| 448 - 451   | 538.4558  | 537.4485  | 537.3387  | 204   | 0 | K.LLHR.D                                |
| 469 - 478   | 1300.7304 | 1299.7231 | 1299.6612 | 47.7  | 0 | K.FINQDPLPER.K                          |
| 469 - 479   | 1428.7789 | 1427.7716 | 1427.7561 | 10.9  | 1 | K.FINQDPLPERK.G                         |
| 479 - 492   | 1445.7564 | 1444.7491 | 1444.7773 | -19.5 | 1 | R.KODIIGEADISSLK.S                      |
| 524 - 545   | 2292.8668 | 2291.8595 | 2291.1770 | 298   | 1 | R.GGANGARIALEPQVNWVSNPK.Q               |
| 531 - 545   | 1708.8348 | 1707.8275 | 1707.8944 | -39.2 | 0 | R.IALEPQVNWVSNPK.Q                      |
| 569 - 586   | 1795.9732 | 1794.9659 | 1795.0819 | -64.6 | 1 | K.KVSLADLIVLGGVAAIEK.A                  |
| 570 - 586   | 1667.8795 | 1666.8722 | 1666.9869 | -68.8 | 0 | K.VSLADLIVLGGVAAIEK.A                   |
| 587 - 604   | 1860.9300 | 1859.9227 | 1859.9530 | -16.3 | 1 | K.AAQAAQFQVVEVPTPGR.V                   |
| 595 - 604   | 1116.6498 | 1115.6425 | 1115.5611 | 73.0  | 0 | K.DVEVPTPGR.V                           |
| 605 - 628   | 2697.2363 | 2696.2290 | 2696.3082 | -29.4 | 0 | R.VDATQNTDLVQFQYLEPLADQFR.N             |
| 629 - 636   | 875.5154  | 874.5082  | 874.4046  | 118   | 0 | R.NYGHOTAR.A                            |
| 637 - 646   | 1201.6701 | 1200.6628 | 1200.6462 | 13.8  | 1 | R.ARTEEILVDR.A                          |
| 639 - 646   | 974.5779  | 973.5706  | 973.5080  | 64.3  | 0 | R.TEEILVDR.A                            |
| 647 - 665   | 1952.0510 | 1951.0437 | 1951.1176 | -37.9 | 0 | R.AALLTLTPPEMTVLVQGLR.A                 |
| 647 - 665   | 1968.0565 | 1967.0492 | 1967.1125 | -32.2 | 0 | R.AALLTLTPPEMTVLVQGLR.A + Oxidation (8) |
| 704 - 716   | 1492.7171 | 1491.7098 | 1491.6954 | 9.68  | 1 | K.KDSQGLMTQDTR.A                        |
| 705 - 716   | 1364.6443 | 1363.6370 | 1363.6004 | 26.8  | 0 | K.DSQGLMTQDTR.A                         |
| 723 - 727   | 634.4443  | 633.4370  | 633.3235  | 179   | 0 | K.WTATR.A                               |
| 728 - 739   | 1314.7274 | 1313.7201 | 1313.6728 | 36.0  | 0 | R.ADLVFGSHAELR.A                        |
| 740 - 751   | 1210.5937 | 1209.5864 | 1209.5877 | -1.06 | 0 | R.AISEVYGSADAK.E                        |
| 757 - 764   | 967.5011  | 966.4939  | 966.4811  | 13.2  | 0 | K.DFISAWTK.V                            |

Spot No.: **93**

Mascot score: **81**

Species: *Fusarium oxysporum Fo5176*

Protein name: **I-amino acid oxidase**

NCBI accession No.: **gi| 342871725**

Sequence coverage %: **27**

Matched peptides No.: **18**

Total peptides No.: **69**

Calculated Mr: **66173**

Calculated pI: **5.58**

### Annotated PMF spectra:

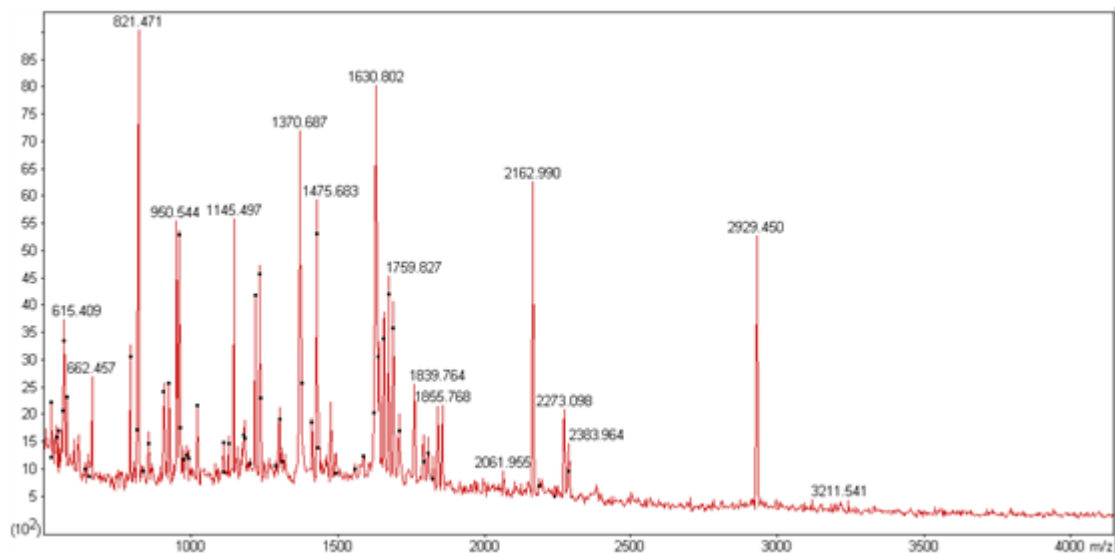

### Probability Based Mowse Score:

Protein score is  $-10 \cdot \log(P)$ , where P is the probability that the observed match is a random event. Protein scores greater than 75 are significant ( $p < 0.05$ ).

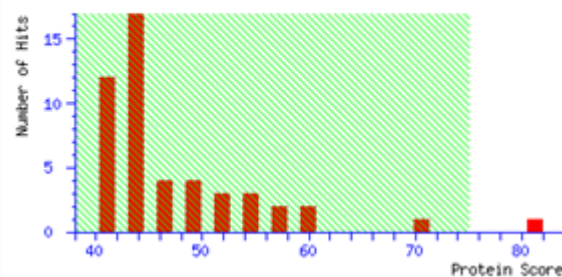

## Matched peptide sequences: shown in **Bold Red**

```

1 MVQFTDKRWG ASVLLLLFLS TAHGSKLPPK AQQPSSCTER PRMQNFNSIG
51 AWFDDVAKLN CNSVSKAPNA SVAIIGGGVS GLTTALMLDS IGLHNWEIIE
101 ASDRVGGRFR TKFVGGTQEF AEMGPMRLPY TVTYKSDDST HEYTEHRLTF
151 QLAETLNEMN GNDSNIILMS LLPGELAAIQ MAEFQQDANS SLAKPPAMVS
201 TEFNETKHRM NEILKNETML KAIQADVWRS HKFVMSKGYD DWSEQCMMRE
251 AFHASENITD AIWTATDYDV FWDEM VHNSN LALDGTKDSL GETEWKCVDG
301 GFNRLTDAFI PHVSDRLVLN RKIRKLESVK GEDGQAQTRL SWYPSVKNRT
351 FESKDYDYTI MAVPFTMTRF MALPSFSSVL GRAISEAGLR FKSACKVSLI
401 FSERFWEKGE RPIFGGYSIP ESRPIGALY PVYGLNESRP GLITHYRGGD
451 WSDRYVSFSD EEHVQTVLDA IVSLHGEQAR ELYTGDYERL CWLKDEHTAT
501 SWCRPDVEQH NLYIPAYHQT EHNTIFIGEH TAPTQAWISS AIYSAARGTI
551 QLLLELGMVE EAKEINRRWM GRWIRDETKP

```

## Matched peptides information:

| Start - End | Observed  | Mr (expt) | Mr (calc) | ppm   | M | Peptide                                           |
|-------------|-----------|-----------|-----------|-------|---|---------------------------------------------------|
| 113 - 127   | 1656.7168 | 1655.7095 | 1655.7436 | -20.6 | 0 | K.FVGGTQEF <b>AEMGPMRLPY</b> .L                   |
| 113 - 127   | 1672.6753 | 1671.6680 | 1671.7385 | -42.2 | 0 | K.FVGGTQEF <b>AEMGPMRLPY</b> .L + Oxidation (O)   |
| 113 - 127   | 1688.6606 | 1687.6533 | 1687.7334 | -47.5 | 0 | K.FVGGTQEF <b>AEMGPMRLPY</b> .L + 2 Oxidation (O) |
| 128 - 135   | 984.4982  | 983.4909  | 983.5328  | -42.5 | 0 | R.LPYTVTYK.S                                      |
| 222 - 229   | 958.5107  | 957.5034  | 957.5032  | 0.25  | 0 | K.AIQADV <b>WRS</b> .S                            |
| 297 - 304   | 924.3967  | 923.3895  | 923.3920  | -2.72 | 0 | K.CVDGG <b>FNR</b> .L                             |
| 305 - 316   | 1370.6872 | 1369.6799 | 1369.6990 | -13.9 | 0 | R.LTDAFIP <b>HVSDR</b> .L                         |
| 331 - 339   | 961.5282  | 960.5209  | 960.4261  | 98.7  | 0 | K.GEDGQA <b>QTR</b> .L                            |
| 355 - 369   | 1839.7640 | 1838.7567 | 1838.8219 | -35.5 | 0 | K.DYDYTIMAV <b>PFTMTRF</b> .F + Oxidation (O)     |
| 355 - 369   | 1855.7683 | 1854.7610 | 1854.8168 | -30.1 | 0 | K.DYDYTIMAV <b>PFTMTRF</b> .F + 2 Oxidation (O)   |
| 370 - 382   | 1411.6746 | 1410.6673 | 1410.7330 | -46.5 | 0 | R.FMALPSFSSV <b>LGR</b> .A                        |
| 370 - 382   | 1427.6801 | 1426.6728 | 1426.7279 | -38.6 | 0 | R.FMALPSFSSV <b>LGR</b> .A + Oxidation (O)        |
| 383 - 390   | 816.4800  | 815.4728  | 815.4501  | 27.8  | 0 | R.AISEA <b>GLR</b> .F                             |
| 397 - 404   | 950.5444  | 949.5372  | 949.5233  | 14.6  | 0 | K.VSLL <b>FSE</b> R.F                             |
| 448 - 454   | 792.3647  | 791.3574  | 791.3198  | 47.5  | 0 | R.GODW <b>SDR</b> .Y                              |
| 455 - 480   | 2929.4501 | 2928.4428 | 2928.4254 | 5.96  | 0 | R.YVSFSD <b>EEHVQTVLDAIVSLHGEQAR</b> .E           |
| 481 - 489   | 1145.4971 | 1144.4898 | 1144.5036 | -12.1 | 0 | R.ELYT <b>GDYER</b> .L                            |
| 548 - 563   | 1759.8271 | 1758.8198 | 1758.9437 | -70.4 | 0 | R.GTIQLLLELGM <b>VEEAK</b> .E + Oxidation (O)     |

Spot No.: **94**

Mascot score: **88**

Species: *Metarhizium acridum* **CQMa 102**

Protein name: **heat shock protein 90**

NCBI accession No.: **gi| 322700250**      Sequence coverage %: **26**

Matched peptides No.: **13**      Total peptides No.: **52**

Calculated Mr: **80088**      Calculated pI: **4.93**

### Annotated PMF spectra:

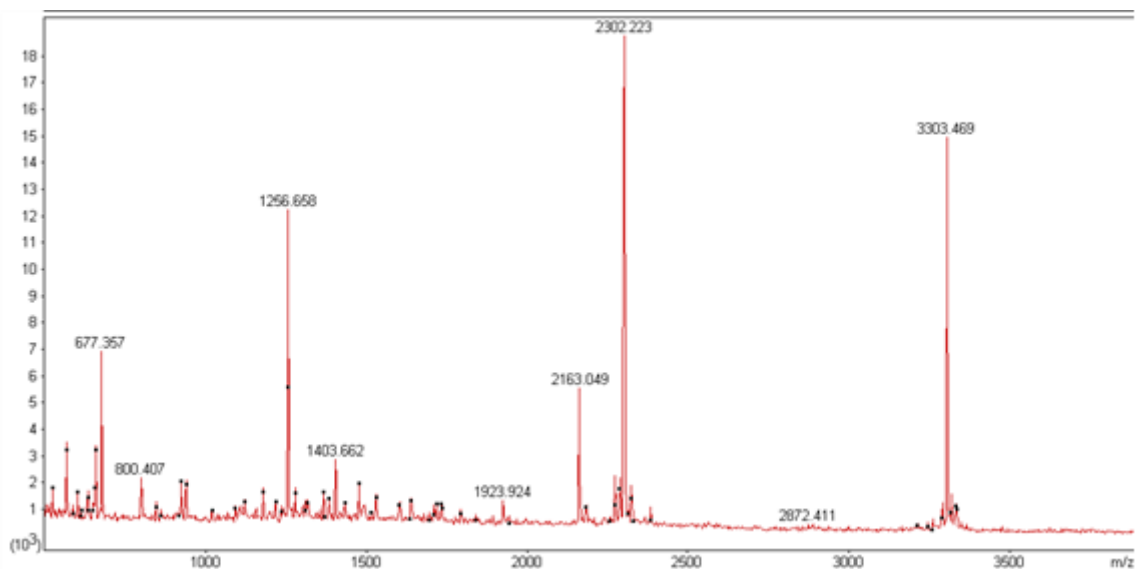

### Probability Based Mowse Score:

Protein score is  $-10 \cdot \log(P)$ , where P is the probability that the observed match is a random event. Protein scores greater than 75 are significant ( $p < 0.05$ ).

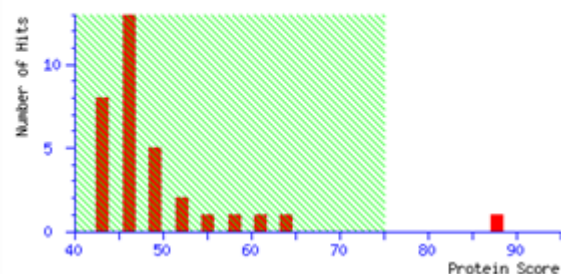

Matched peptide sequences: shown in **Bold Red**

```

1 MSETFEFQAE ISQLLSLIIN TVYSNKEIFL RELVSNASDA LDKIRYKALS
51 DPSQLDSGKD LRIDIIPNKE AKTLTIRDTG IGMTKADLVN NLGTIARSGT
101 KQFMEALTAG ADVSMIGQFG VGFYSAYLVA DKVTVVSKNN DDEQYIWESS
151 AGGTFSITAD TEGKQLGRGT SIILHLKDEQ AEYLNESKIK EVIKKHSEFI
201 SYPIYLHVQK EIEKEVPDED AEAEAEKEEE GDDKKPRIEE VDEDEEKEK
251 KKKTKVKKET TIEEEELNKQ KPIWTRNPQD ITQEEYASFY KLSLNDWEDH
301 LAVKHFSVEG QLEFRALFV PKRAPFDLFE TKKTKNNIKL YVRRVFITDD
351 ATELIPEWLS FVKGVVDSER LPLNLSRETL QQNKIMKVIK KNIVKKSLEL
401 FQEIAEDKEQ FDKFYSAFSK NLKLGIHEDS QNRQQLAKLL RFNSTKSGDE
451 MTSLSDYVTR MPEHQKNMYI ITGESIKAVS KSPFLDTLKE KGFEVLFLVD
501 PIDEYAMTQL KEFEEKKLV DITKDFELET DEEKKAREEE EKEYESLAKS
551 LKNVLGEKVE KVVVSHKGL SPCAIRTGQF GWSANMERIM KAQALRDTSM
601 SSYMSSKKT EISPKSPIK ELKKKVEADG ENDRTVKSIV QLLFETSLLV
651 SGFTIEEPAG FAERIHKLVQ LGLNIEEDS APAEAPAEAA PAAETGDSAM
701 EEVD

```

Matched peptides information:

| Start - End | Observed  | Mr (expt) | Mr (calc) | ppm   | M | Peptide                                             |
|-------------|-----------|-----------|-----------|-------|---|-----------------------------------------------------|
| 27 - 31     | 677.3574  | 676.3501  | 676.3908  | -60.2 | 0 | K.EIFLR.E                                           |
| 32 - 45     | 1530.8175 | 1529.8102 | 1529.8049 | 3.48  | 1 | R.ELVSNASDALDKIR.Y                                  |
| 48 - 59     | 1217.5648 | 1216.5575 | 1216.5935 | -29.6 | 0 | K.ALSDPSQLDSGK.D                                    |
| 48 - 62     | 1601.8038 | 1600.7965 | 1600.8056 | -5.70 | 1 | K.ALSDPSQLDSGKDLR.I                                 |
| 73 - 77     | 603.3235  | 602.3162  | 602.3752  | -97.9 | 0 | K.TLTIR.D                                           |
| 86 - 97     | 1256.6581 | 1255.6508 | 1255.6884 | -29.9 | 0 | K.ADLVNNLGTIAR.S                                    |
| 102 - 132   | 3303.4686 | 3302.4613 | 3301.5676 | 271   | 0 | K.QFMEALTAGADVSMIGQFGVGFYSAYLVADK.V + Oxidation (H) |
| 139 - 168   | 3289.3475 | 3288.3402 | 3288.4807 | -42.7 | 1 | K.HNDEQYIWESSAGGTFSITADTEGKQLOR.G                   |
| 235 - 248   | 1730.8546 | 1729.8473 | 1729.8006 | 27.0  | 1 | K.KPRIEEVDEDEEK.E                                   |
| 553 - 558   | 659.3396  | 658.3323  | 658.3650  | -49.6 | 0 | K.NVLGEK.V                                          |
| 577 - 588   | 1383.6584 | 1382.6511 | 1382.6037 | 34.3  | 0 | R.TGQFQWSANMER.I                                    |
| 597 - 607   | 1255.5411 | 1254.5338 | 1254.4744 | 47.4  | 0 | R.DTSMSSYMSSK.K + 2 Oxidation (H)                   |
| 638 - 667   | 3332.5234 | 3331.5161 | 3330.7864 | 219   | 1 | K.SIVQLLFETSLLVSGFTIEEPAGFAERIK.L                   |



Spot No.: **95**

Mascot score: **110**

Species: *Fusarium oxysporum f. sp. cubense race 4*

Protein name: **hypothetical protein FOC4\_g10007540**

NCBI accession No.: **gi| 475667056**      Sequence coverage %: **38**

Matched peptides No.: **17**      Total peptides No.: **72**

Calculated Mr: **50452**      Calculated pI: **6.62**

### Annotated PMF spectra:

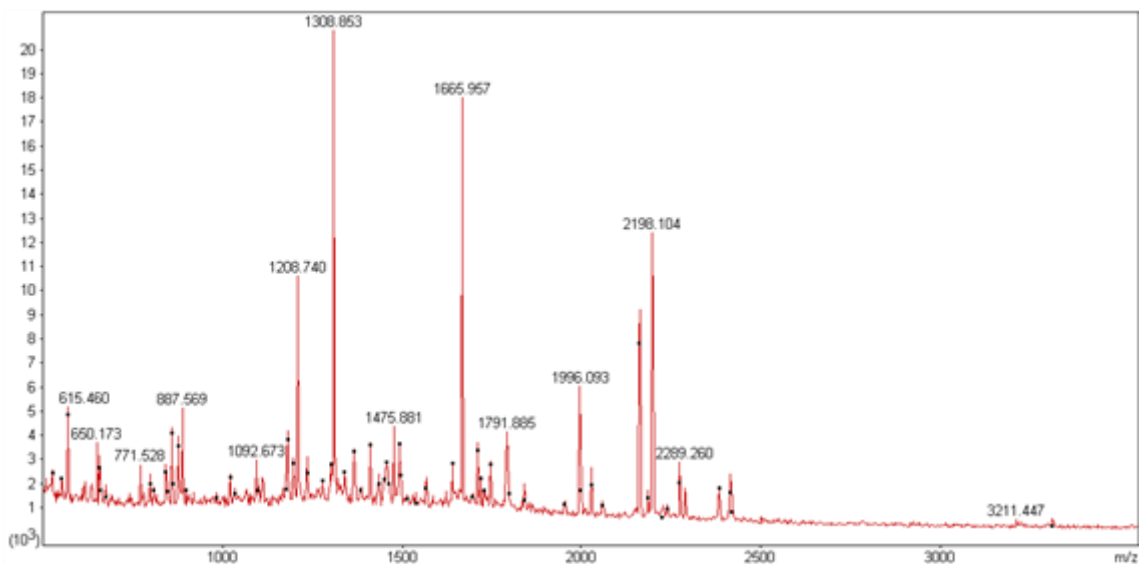

### Probability Based Mowse Score:

Protein score is  $-10 \cdot \log(P)$ , where P is the probability that the observed match is a random event. Protein scores greater than 75 are significant ( $p < 0.05$ ).

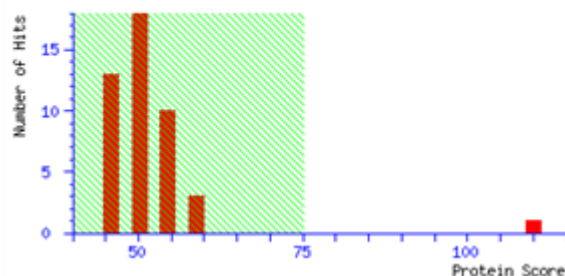

Matched peptide sequences: shown in **Bold Red**

```

1  MVSSKLLFLA VIAAVQAIDV DVAVVGGGGS GGYAAVQLRE NYGKKIVVIE
51  KQKQLGGHAQ SWYDPVTGKA YNYGVDAFTN ITVSIDFFKQ LKVPIGPVQS
101 EQVRNLYVDF KDGKTVDYTP PTTKEAADAM GNYRDQWLKY TDILLPTSEN
151 FPRGDKVPSD LLLSWYEFAR KYKAEASPS IWDTVVVDLN TALMIDVWKA
201 WNPSVGSFQP ASGDNTEIWQ KAARKVLGKDV LYESEVVSAK RSKSGVKLQV
251 RDKDGQVINI NAKRLITIG PETINPKYFD LNSEELEVFH SAAGNRYYG
301 IVSHPSLPAA EITNIVPAAI NENYLAYPTV PFQAYFHYKG NSSTGPIHRA
351 LAIVPRDTSI EDKDLIRKS LQNLIDAGTI PAGNSTDLDF RTFSDHGLLY
401 RRWSADQLRG GIFAKANALQ GQRSTWYTGA FWMNDCVML WNTTNAILKE
451 MLKDI

```

Matched peptides information:

| Start - End | Observed  | Mr (expt) | Mr (calc) | ppm  | M | Peptide                   |
|-------------|-----------|-----------|-----------|------|---|---------------------------|
| 52 - 69     | 2000.1163 | 1999.1090 | 1998.9912 | 59.0 | 1 | K.QKQLGGHAQSWYDPVTGK.A    |
| 54 - 69     | 1743.9508 | 1742.9435 | 1742.8376 | 60.8 | 0 | K.QLGGHAQSWYDPVTGK.A      |
| 93 - 104    | 1308.8529 | 1307.8456 | 1307.7198 | 96.2 | 0 | K.VPIGPIVQSEQVR.N         |
| 105 - 111   | 898.4947  | 897.4874  | 897.4596  | 31.0 | 0 | R.NLYVDFK.D               |
| 125 - 134   | 1097.6195 | 1096.6122 | 1096.4607 | 138  | 0 | K.EAADAKRNYR.D            |
| 140 - 153   | 1665.9566 | 1664.9493 | 1664.8410 | 65.1 | 0 | K.YTDILLPTSENFFR.G        |
| 154 - 170   | 1996.0927 | 1995.0854 | 1995.0102 | 37.7 | 1 | R.GDRVPSDLLLSWYEFAR.K     |
| 200 - 221   | 2419.2079 | 2418.2006 | 2418.1240 | 31.7 | 0 | K.AMNPVGSFQPASGDNTEIWQR.A |
| 229 - 240   | 1338.7752 | 1337.7679 | 1337.6714 | 72.1 | 0 | K.DVLYESEVVSAR.R          |
| 264 - 277   | 1565.0035 | 1563.9962 | 1563.9348 | 39.3 | 1 | K.RLLITIGPETINPK.Y        |
| 265 - 277   | 1408.9490 | 1407.9417 | 1407.8337 | 76.7 | 0 | R.LLITIGPETINPK.Y         |
| 278 - 296   | 2198.1039 | 2197.0966 | 2197.0076 | 40.5 | 0 | K.YFDLNSEELEVFHSAAGNR.Y   |
| 392 - 401   | 1208.7396 | 1207.7323 | 1207.5986 | 111  | 0 | R.TFSDHGLLYR.R            |
| 402 - 409   | 1031.6618 | 1030.6545 | 1030.5308 | 120  | 1 | R.RWSADQLR.G              |
| 403 - 409   | 875.5438  | 874.5365  | 874.4297  | 122  | 0 | R.WSADQLR.G               |
| 403 - 415   | 1448.7861 | 1447.7788 | 1447.7572 | 14.9 | 1 | R.WSADQLRGGIFAK.A         |
| 416 - 423   | 857.5740  | 856.5667  | 856.4515  | 135  | 0 | K.ANALQQQR.S              |

Spot No.: **96**

NCBI accession No.: **gi/475671883**

Plant species: ***Fusarium oxysporum f. sp. cubense race 4***

Protein name: **Ribonuclease Trv**

Mascot score: **185**

Sequence coverage %: **13**

The number of matched peptides with  $p \leq 0.05$ : **3**

Calculated Mr: **29672**

Calculated Pi: **5.61**

### Annotated MS spectra:

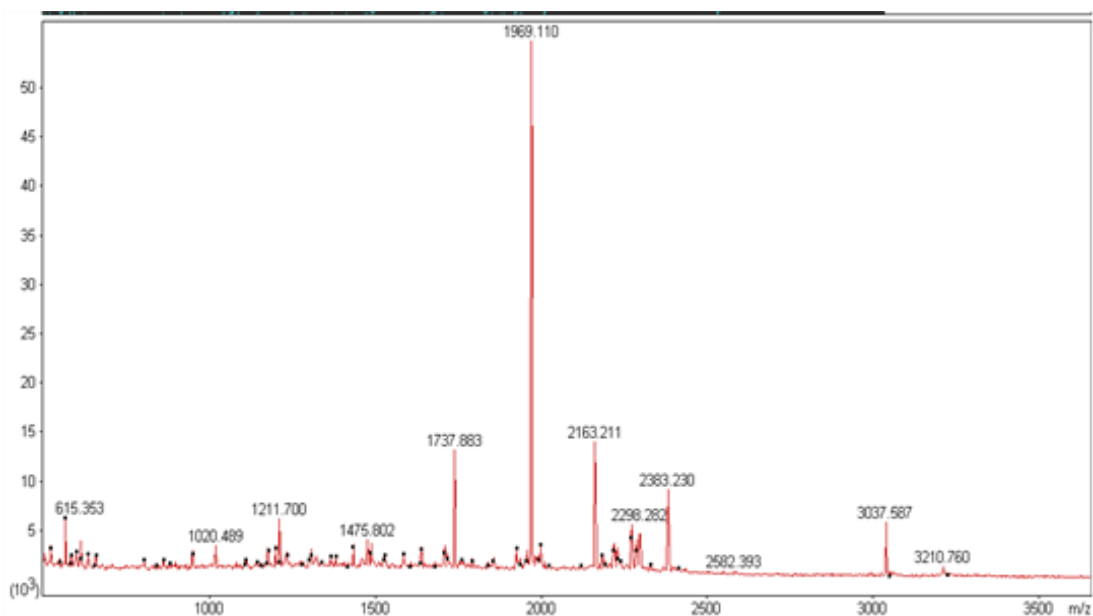

### Probability Based Mowse Score:

Ions score is  $-10 \cdot \log(P)$ , where P is the probability that the observed match is a random event. Individual ions scores  $> 47$  indicate identity or extensive homology ( $p < 0.05$ ). Protein scores are derived from ions scores as a non-probabilistic basis for ranking protein hits.

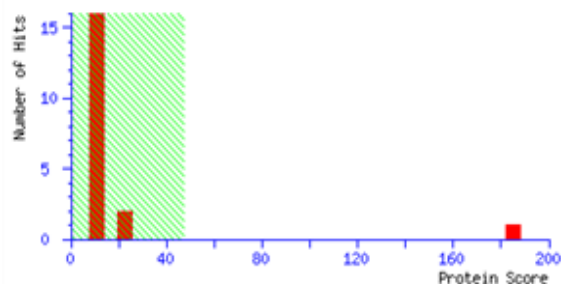

Matched peptide sequences: shown in **Bold Red**

```

1  MTFIKAL IPL  ALYLAGVQAK  SCSAGGKPTA  EFCSKDLPLS  CHNTTAVEDT
51 CCFIPAGQLL  QTQFWDSDPV  AGPHDSWTIH  GLWPDYCDGT  YPQFCDKSRE
101 YTNIKDLVTK  FLGKKTVSYM  DKYWVSQDGN  DESLWEHEFN  KHGTCISTLE
151 PSCYTNYETG  AEAADYVKKT  ISLFKTLPTY  KWLAEAGIKP  SKTKTYTADE
201 IVDALAEHHG  ARVTIGCSNG  SLSEVWYHFN  VKGSLQDGQF  VSSEPDGSKS
251 SCPDSGIKYA  PKK

```

Matched peptides information:

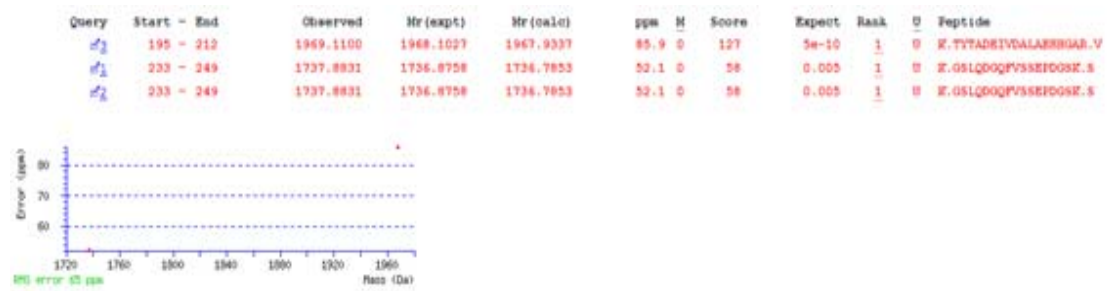

**Annotated ion spectra of the matched peptides with  $p \leq 0.05$ :**

CID No.: **96-1737.8**

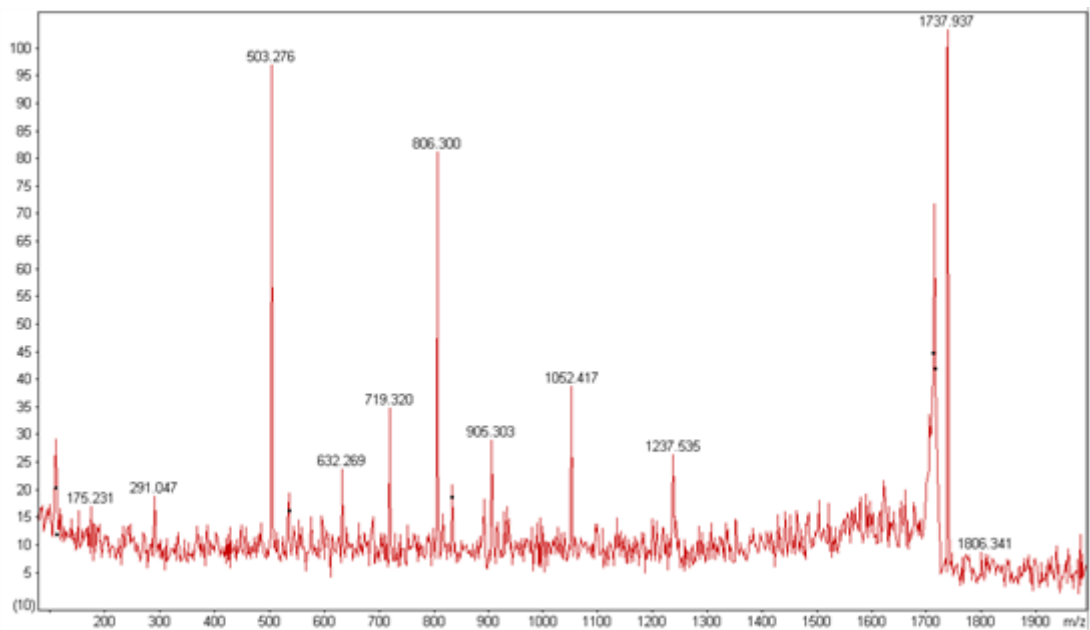

MS/MS Fragmentation of **K.GSLQDGQFVSSEPDGSK.S**

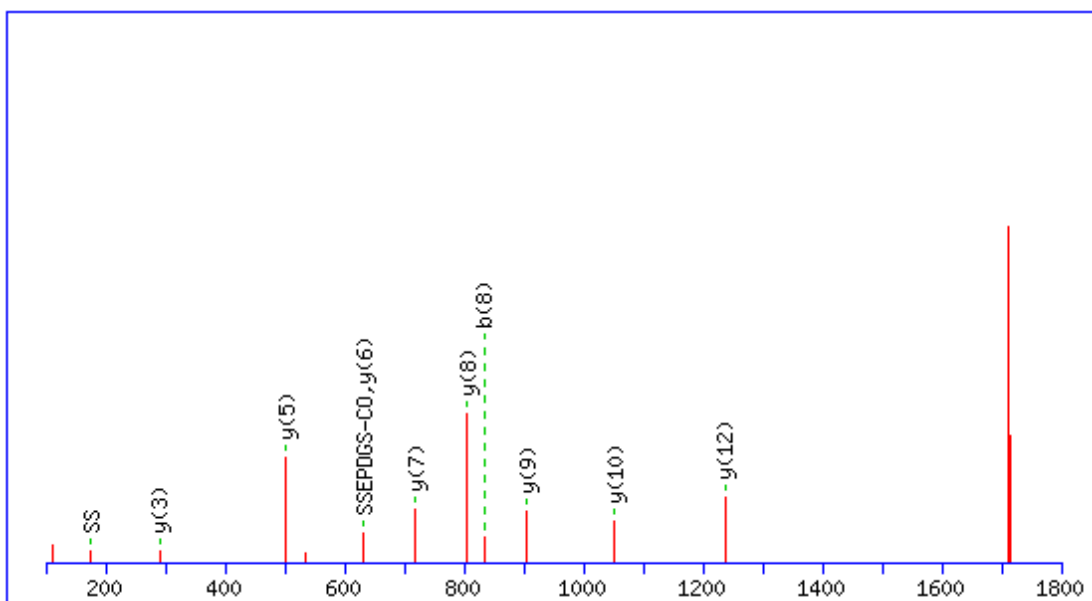

Monoisotopic mass of neutral peptide  $M_r(\text{calc})$ : 1736.7853

| #  | Immon.   | a         | a*        | a <sup>0</sup> | b         | b*        | b <sup>0</sup> | d         | Seq. | v         | w         | y         | y*        | y <sup>0</sup> | #  |
|----|----------|-----------|-----------|----------------|-----------|-----------|----------------|-----------|------|-----------|-----------|-----------|-----------|----------------|----|
| 1  | 30.0338  | 30.0338   |           |                | 58.0287   |           |                | 44.0495   | G    |           |           |           |           |                | 17 |
| 2  | 60.0444  | 117.0659  |           | 99.0553        | 145.0608  |           | 127.0502       | 101.0709  | S    | 1648.7449 | 1647.7497 | 1680.7711 | 1663.7446 | 1662.7606      | 16 |
| 3  | 86.0964  | 230.1499  |           | 212.1394       | 258.1448  |           | 240.1343       | 188.1030  | L    | 1535.6609 | 1534.6656 | 1593.7391 | 1576.7126 | 1575.7285      | 15 |
| 4  | 101.0709 | 358.2085  | 341.1819  | 340.1979       | 386.2034  | 369.1769  | 368.1928       | 301.1870  | Q    | 1407.6023 | 1406.6070 | 1480.6550 | 1463.6285 | 1462.6445      | 14 |
| 5  | 88.0393  | 473.2354  | 456.2089  | 455.2249       | 501.2304  | 484.2038  | 483.2198       | 429.2456  | D    | 1292.5753 | 1291.5801 | 1352.5965 | 1335.5699 | 1334.5859      | 13 |
| 6  | 30.0338  | 530.2569  | 513.2304  | 512.2463       | 558.2518  | 541.2253  | 540.2413       |           | G    |           |           | 1237.5695 | 1220.5430 | 1219.5590      | 12 |
| 7  | 101.0709 | 658.3155  | 641.2889  | 640.3049       | 686.3104  | 669.2838  | 668.2998       | 601.2940  | Q    | 1107.4953 | 1106.5000 | 1180.5481 | 1163.5215 | 1162.5375      | 11 |
| 8  | 120.0808 | 805.3839  | 788.3573  | 787.3733       | 833.3788  | 816.3523  | 815.3682       |           | F    | 960.4269  |           | 1052.4895 | 1035.4629 | 1034.4789      | 10 |
| 9  | 72.0808  | 904.4523  | 887.4258  | 886.4417       | 932.4472  | 915.4207  | 914.4367       | 890.4367  | V    | 861.3585  | 874.3789  | 905.4211  | 888.3945  | 887.4105       | 9  |
| 10 | 60.0444  | 991.4843  | 974.4578  | 973.4738       | 1019.4793 | 1002.4527 | 1001.4687      | 975.4894  | S    | 774.3264  | 773.3312  | 806.3527  | 789.3261  | 788.3421       | 8  |
| 11 | 60.0444  | 1078.5164 | 1061.4898 | 1060.5058      | 1106.5113 | 1089.4847 | 1088.5007      | 1062.5214 | S    | 687.2944  | 686.2992  | 719.3206  | 702.2941  | 701.3101       | 7  |
| 12 | 102.0550 | 1207.5590 | 1190.5324 | 1189.5484      | 1235.5539 | 1218.5273 | 1217.5433      | 1149.5535 | E    | 558.2518  | 557.2566  | 632.2886  | 615.2620  | 614.2780       | 6  |
| 13 | 70.0651  | 1304.6117 | 1287.5852 | 1286.6012      | 1332.6066 | 1315.5801 | 1314.5961      | 1278.5961 | P    | 461.1991  | 460.2038  | 503.2460  | 486.2195  | 485.2354       | 5  |
| 14 | 88.0393  | 1419.6387 | 1402.6121 | 1401.6281      | 1447.6336 | 1430.6070 | 1429.6230      | 1375.6488 | D    | 346.1721  | 345.1769  | 406.1932  | 389.1667  | 388.1827       | 4  |
| 15 | 30.0338  | 1476.6601 | 1459.6336 | 1458.6496      | 1504.6550 | 1487.6285 | 1486.6445      |           | G    |           |           | 291.1663  | 274.1397  | 273.1557       | 3  |
| 16 | 60.0444  | 1563.6922 | 1546.6656 | 1545.6816      | 1591.6871 | 1574.6605 | 1573.6765      | 1547.6972 | S    | 202.1186  | 201.1234  | 234.1448  | 217.1183  | 216.1343       | 2  |
| 17 | 101.1073 |           |           |                |           |           |                |           | K    | 74.0237   | 73.0284   | 147.1128  | 130.0863  |                | 1  |

| Seq    | ya       | yb       | Seq    | ya       | yb       | Seq     | ya       | yb       |
|--------|----------|----------|--------|----------|----------|---------|----------|----------|
| SL     | 173.1285 | 201.1234 | SLQ    | 301.1870 | 329.1819 | SLQD    | 416.2140 | 444.2089 |
| SLQDG  | 473.2354 | 501.2304 | SLQDGQ | 601.2940 | 629.2889 | LQ      | 214.1550 | 242.1499 |
| LQD    | 329.1819 | 357.1769 | LQDG   | 386.2034 | 414.1983 | LQDGQ   | 514.2620 | 542.2569 |
| LQDGQF | 661.3304 | 689.3253 | QD     | 216.0979 | 244.0928 | QDG     | 273.1193 | 301.1143 |
| QDGQ   | 401.1779 | 429.1728 | QDGQF  | 548.2463 | 576.2413 | QDGQFV  | 647.3148 | 675.3097 |
| DG     | 145.0608 | 173.0557 | DGQ    | 273.1193 | 301.1143 | DGQF    | 420.1878 | 448.1827 |
| DGQFV  | 519.2562 | 547.2511 | DGQFVS | 606.2882 | 634.2831 | DGQFVSS | 693.3202 | 721.3151 |
| GQ     | 158.0924 | 186.0873 | GQF    | 305.1608 | 333.1557 | GQFV    | 404.2292 | 432.2241 |
| GQFVS  | 491.2613 | 519.2562 | GQFVSS | 578.2933 | 606.2882 | QF      | 248.1394 | 276.1343 |
| QFV    | 347.2078 | 375.2027 | QFVS   | 434.2398 | 462.2347 | QFVSS   | 521.2718 | 549.2667 |
| QFVSSE | 650.3144 | 678.3093 | FV     | 219.1492 | 247.1441 | FVS     | 306.1812 | 334.1761 |
| FVSS   | 393.2132 | 421.2082 | FVSSE  | 522.2558 | 550.2508 | FVSSEP  | 619.3086 | 647.3035 |
| VS     | 159.1128 | 187.1077 | VSS    | 246.1448 | 274.1397 | VSSE    | 375.1874 | 403.1823 |
| VSSEP  | 472.2402 | 500.2351 | VSSEPD | 587.2671 | 615.2620 | VSSEPDG | 644.2886 | 672.2835 |
| SS     | 147.0764 | 175.0713 | SSE    | 276.1190 | 304.1139 | SSEP    | 373.1718 | 401.1667 |
| SSEPD  | 488.1987 | 516.1936 | SSEPDG | 545.2202 | 573.2151 | SSEPDGS | 632.2522 | 660.2471 |
| SE     | 189.0870 | 217.0819 | SEP    | 286.1397 | 314.1347 | SEPD    | 401.1667 | 429.1616 |
| SEPDG  | 458.1882 | 486.1831 | SEPDGS | 545.2202 | 573.2151 | EP      | 199.1077 | 227.1026 |
| EPD    | 314.1347 | 342.1296 | EPDG   | 371.1561 | 399.1510 | EPDGS   | 458.1882 | 486.1831 |
| PD     | 185.0921 | 213.0870 | PDG    | 242.1135 | 270.1084 | PDGS    | 329.1456 | 357.1405 |
| DG     | 145.0608 | 173.0557 | DGS    | 232.0928 | 260.0877 | GS      | 117.0659 | 145.0608 |

## Annotated ion spectra of the matched peptides with $p \leq 0.05$ :

CID No.: **96-1969.1**

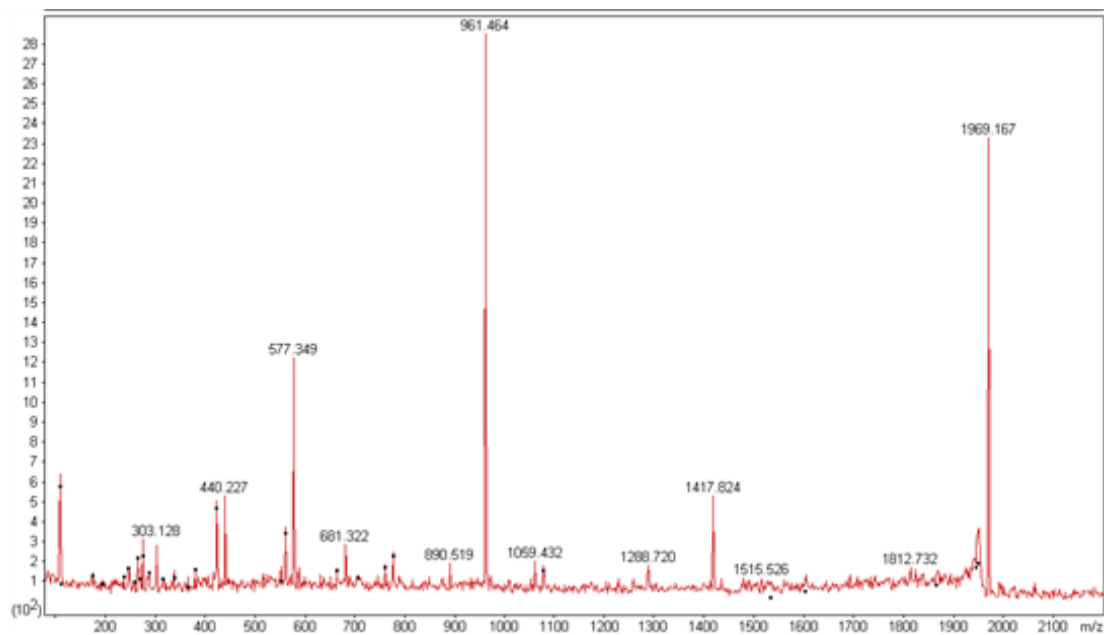

MS/MS Fragmentation of **K.TYTADEIVDALAEHHGAR.V**

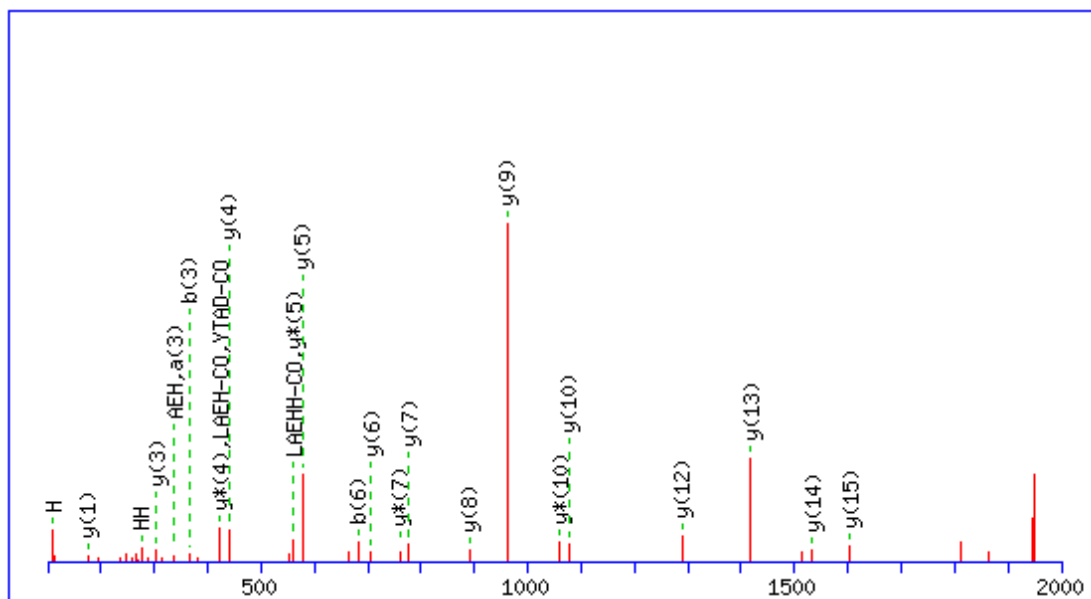

Monoisotopic mass of neutral peptide  $M_r(\text{calc})$ : 1967.9337

| #  | Immon.   | a         | a <sup>0</sup> | b         | b <sup>0</sup> | d         | d'       | Seq. | v         | w         | w'        | y         | y*        | y <sup>0</sup> | #  |
|----|----------|-----------|----------------|-----------|----------------|-----------|----------|------|-----------|-----------|-----------|-----------|-----------|----------------|----|
| 1  | 74.0600  | 74.0600   | 56.0495        | 102.0550  | 84.0444        | 44.0495   |          | T    |           |           |           |           |           |                | 18 |
| 2  | 136.0757 | 237.1234  | 219.1128       | 265.1183  | 247.1077       |           |          | Y    | 1759.8358 |           |           | 1867.8933 | 1850.8668 | 1849.8828      | 17 |
| 3  | 74.0600  | 338.1710  | 320.1605       | 366.1660  | 348.1554       | 322.1761  | 324.1554 | T    | 1658.7881 | 1671.8085 | 1673.7878 | 1704.8300 | 1687.8034 | 1686.8194      | 16 |
| 4  | 44.0495  | 409.2082  | 391.1976       | 437.2031  | 419.1925       |           |          | A    | 1587.7510 |           |           | 1603.7823 | 1586.7558 | 1585.7717      | 15 |
| 5  | 88.0393  | 524.2351  | 506.2245       | 552.2300  | 534.2195       | 480.2453  |          | D    | 1472.7241 | 1471.7288 |           | 1532.7452 | 1515.7186 | 1514.7346      | 14 |
| 6  | 102.0550 | 653.2777  | 635.2671       | 681.2726  | 663.2620       | 595.2722  |          | E    | 1343.6815 | 1342.6862 |           | 1417.7183 | 1400.6917 | 1399.7077      | 13 |
| 7  | 86.0964  | 766.3618  | 748.3512       | 794.3567  | 776.3461       | 738.3305  | 752.3461 | I    | 1230.5974 | 1243.6178 | 1257.6335 | 1288.6757 | 1271.6491 | 1270.6651      | 12 |
| 8  | 72.0808  | 865.4302  | 847.4196       | 893.4251  | 875.4145       | 851.4145  |          | V    | 1131.5290 | 1144.5494 |           | 1175.5916 | 1158.5650 | 1157.5810      | 11 |
| 9  | 88.0393  | 980.4571  | 962.4466       | 1008.4520 | 990.4415       | 936.4673  |          | D    | 1016.5021 | 1015.5068 |           | 1076.5232 | 1059.4966 | 1058.5126      | 10 |
| 10 | 44.0495  | 1051.4942 | 1033.4837      | 1079.4891 | 1061.4786      |           |          | A    | 945.4649  |           |           | 961.4962  | 944.4697  | 943.4857       | 9  |
| 11 | 86.0964  | 1164.5783 | 1146.5677      | 1192.5732 | 1174.5626      | 1122.5313 |          | L    | 832.3809  | 831.3856  |           | 890.4591  | 873.4326  | 872.4486       | 8  |
| 12 | 44.0495  | 1235.6154 | 1217.6048      | 1263.6103 | 1245.5998      |           |          | A    | 761.3438  |           |           | 777.3751  | 760.3485  | 759.3645       | 7  |
| 13 | 102.0550 | 1364.6580 | 1346.6474      | 1392.6529 | 1374.6424      | 1306.6525 |          | E    | 632.3012  | 631.3059  |           | 706.3379  | 689.3114  | 688.3274       | 6  |
| 14 | 110.0713 | 1501.7169 | 1483.7064      | 1529.7118 | 1511.7013      |           |          | H    | 495.2423  |           |           | 577.2954  | 560.2688  |                | 5  |
| 15 | 110.0713 | 1638.7758 | 1620.7653      | 1666.7707 | 1648.7602      |           |          | H    | 358.1833  |           |           | 440.2364  | 423.2099  |                | 4  |
| 16 | 30.0338  | 1695.7973 | 1677.7867      | 1723.7922 | 1705.7816      |           |          | G    |           |           |           | 303.1775  | 286.1510  |                | 3  |
| 17 | 44.0495  | 1766.8344 | 1748.8238      | 1794.8293 | 1776.8188      |           |          | A    | 230.1248  |           |           | 246.1561  | 229.1295  |                | 2  |
| 18 | 129.1135 |           |                |           |                |           |          | R    | 74.0237   | 73.0284   |           | 175.1190  | 158.0924  |                | 1  |

| Seq     | ya       | yb       | Seq    | ya       | yb       | Seq     | ya       | yb       |
|---------|----------|----------|--------|----------|----------|---------|----------|----------|
| YT      | 237.1234 | 265.1183 | YTA    | 308.1605 | 336.1554 | YTAD    | 423.1874 | 451.1823 |
| YTADE   | 552.2300 | 580.2249 | YTADEI | 665.3141 | 693.3090 | TA      | 145.0972 | 173.0921 |
| TAD     | 260.1241 | 288.1190 | TADE   | 389.1667 | 417.1616 | TADEI   | 502.2508 | 530.2457 |
| TADEIV  | 601.3192 | 629.3141 | AD     | 159.0764 | 187.0713 | ADE     | 288.1190 | 316.1139 |
| ADEI    | 401.2031 | 429.1980 | ADEIV  | 500.2715 | 528.2664 | ADEIVD  | 615.2984 | 643.2933 |
| ADEIVDA | 686.3355 | 714.3305 | DE     | 217.0819 | 245.0768 | DEI     | 330.1660 | 358.1609 |
| DEIV    | 429.2344 | 457.2293 | DEIVD  | 544.2613 | 572.2562 | DEIVDA  | 615.2984 | 643.2933 |
| EI      | 215.1390 | 243.1339 | EIV    | 314.2074 | 342.2023 | EIVD    | 429.2344 | 457.2293 |
| EIVDA   | 500.2715 | 528.2664 | EIVDAL | 613.3556 | 641.3505 | EIVDALA | 684.3927 | 712.3876 |
| IV      | 185.1648 | 213.1598 | IVD    | 300.1918 | 328.1867 | IVDA    | 371.2289 | 399.2238 |
| IVDAL   | 484.3130 | 512.3079 | IVDALA | 555.3501 | 583.3450 | IVDALAE | 684.3927 | 712.3876 |
| VD      | 187.1077 | 215.1026 | VDA    | 258.1448 | 286.1397 | VDAL    | 371.2289 | 399.2238 |
| VDALA   | 442.2660 | 470.2609 | VDALAE | 571.3086 | 599.3035 | DA      | 159.0764 | 187.0713 |
| DAL     | 272.1605 | 300.1554 | DALA   | 343.1976 | 371.1925 | DALAE   | 472.2402 | 500.2351 |
| DALAEH  | 609.2991 | 637.2940 | AL     | 157.1335 | 185.1285 | ALA     | 228.1707 | 256.1656 |
| ALAE    | 357.2132 | 385.2082 | ALAEH  | 494.2722 | 522.2671 | ALAEHH  | 631.3311 | 659.3260 |
| ALAEHHG | 688.3525 | 716.3474 | LA     | 157.1335 | 185.1285 | LAE     | 286.1761 | 314.1710 |
| LAEH    | 423.2350 | 451.2300 | LAEHH  | 560.2940 | 588.2889 | LAEHHG  | 617.3154 | 645.3103 |

|         |          |          |       |          |          |        |          |          |
|---------|----------|----------|-------|----------|----------|--------|----------|----------|
| LAEHHGA | 688.3525 | 716.3474 | AE    | 173.0921 | 201.0870 | AEH    | 310.1510 | 338.1459 |
| AEHH    | 447.2099 | 475.2048 | AEHHG | 504.2314 | 532.2263 | AEHHGA | 575.2685 | 603.2634 |
| EH      | 239.1139 | 267.1088 | EHH   | 376.1728 | 404.1677 | EHHG   | 433.1942 | 461.1892 |
| EHHGA   | 504.2314 | 532.2263 | HH    | 247.1302 | 275.1251 | HHG    | 304.1516 | 332.1466 |
| HHGA    | 375.1888 | 403.1837 | HG    | 167.0927 | 195.0877 | HGA    | 238.1299 | 266.1248 |
| GA      | 101.0709 | 129.0659 |       |          |          |        |          |          |



Spot No.: **97**

Mascot score: **92**

Species: *Fusarium oxysporum f. sp. cubense race 1*

Protein name: **14-3-3 protein like protein**

NCBI accession No.: **gi| 477507337**      Sequence coverage %: **61**

Matched peptides No.: **13**      Total peptides No.: **60**

Calculated Mr: **30058**      Calculated pI: **4.87**

### Annotated PMF spectra:

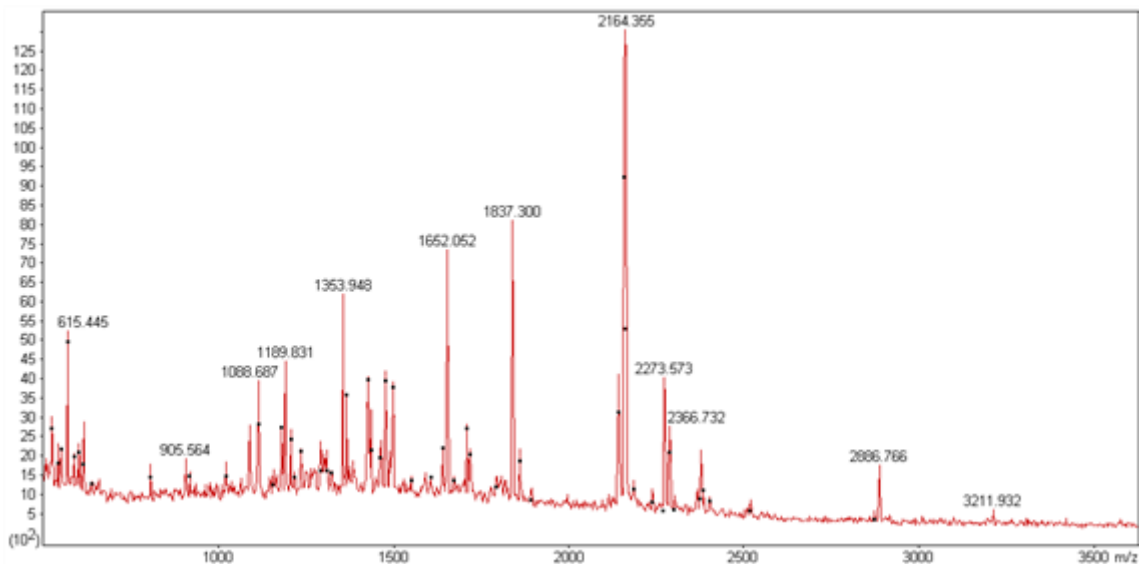

### Probability Based Mowse Score:

Protein score is  $-10 \cdot \log(P)$ , where P is the probability that the observed match is a random event. Protein scores greater than 75 are significant ( $p < 0.05$ ).

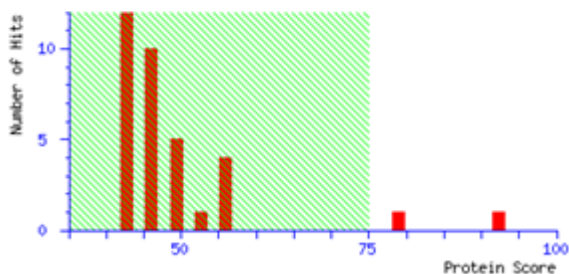

Matched peptide sequences: shown in **Bold Red**

1 MATETFLARL **CEQAERYDEM** **VTYMKEVAKL** GGELTVDERN LLSVAYKNVV  
 51 GRRASWRII **SSIEQKEESK** GSDKHVSTIK DYRNKIETEL EKVCQDVLVDV  
 101 LDDFLIPNAA **TGESKVFYHK** MKGDYHRYLA **EFASGEKRRG** AATAAHDAYK  
 151 **SATDVAQTEL** **TPTHPIRLGL** ALNFSVFYFE ILNSPDRACH LAK**QAFDDAI**  
 201 **AELDSLSEES** YRDSTLIMQL LRDNLTLWTS SDSAEGEAAG AADAPK**KEEE**  
 251 **AAKPAEPAAA** **PAEEPAPAAA** S

Matched peptides information:

| Start | End | Observed  | Mr (expt) | Mr (calc) | ppa   | M | Peptide                            |
|-------|-----|-----------|-----------|-----------|-------|---|------------------------------------|
| 10    | 16  | 905.5637  | 904.5564  | 904.4072  | 165   | 0 | R.LCEQAEK.Y                        |
| 17    | 25  | 1179.7910 | 1178.7837 | 1178.4988 | 242   | 0 | R.YDEMVTYNGK.E                     |
| 17    | 29  | 1639.1938 | 1638.1865 | 1637.7317 | 278   | 1 | R.YDEMVTYMKVAK.L + 2 Oxidation (0) |
| 30    | 39  | 1088.6870 | 1087.6797 | 1087.5509 | 118   | 0 | K.LGELTVDER.N                      |
| 59    | 66  | 917.5289  | 916.5217  | 916.5229  | -1.37 | 0 | R.IISSIEQK.E                       |
| 93    | 115 | 2518.8010 | 2517.7937 | 2518.2261 | -172  | 0 | K.VCQDVLVDLDDFLIPNAATQESK.V        |
| 128   | 137 | 1114.6283 | 1113.6210 | 1113.5342 | 78.0  | 0 | R.YLAEFASGEK.R                     |
| 151   | 167 | 1837.2996 | 1836.2923 | 1835.9377 | 193   | 0 | K.SATDVAQTELTPTHPIR.L              |
| 194   | 212 | 2159.3618 | 2158.3545 | 2157.9702 | 178   | 0 | K.QAFDDAIAELDSLSEESYR.D            |
| 213   | 222 | 1189.8305 | 1188.8232 | 1188.6536 | 143   | 0 | R.DSTLIMQLLR.D                     |
| 213   | 222 | 1205.8528 | 1204.8455 | 1204.6485 | 164   | 0 | R.DSTLIMQLLR.D + Oxidation (0)     |
| 223   | 246 | 2376.5861 | 2375.5788 | 2376.0717 | -207  | 0 | R.DNLTLMTSSDSAEGEAAGAADAPK.K       |
| 247   | 271 | 2403.5536 | 2402.5463 | 2402.1600 | 161   | 1 | K.KEEEAAPAEPAAPAEPAAPAAA.S         |

Spot No.: **98**

Mascot score: **83**

Species: *Fusarium oxysporum f. sp. cubense race 1*

Protein name: **Beta-hexosaminidase subunit A1**

NCBI accession No.: **gi| 477513214**      Sequence coverage %: **31**

Matched peptides No.: **12**      Total peptides No.: **64**

Calculated Mr: **34198**      Calculated pI: **6.25**

### Annotated PMF spectra:

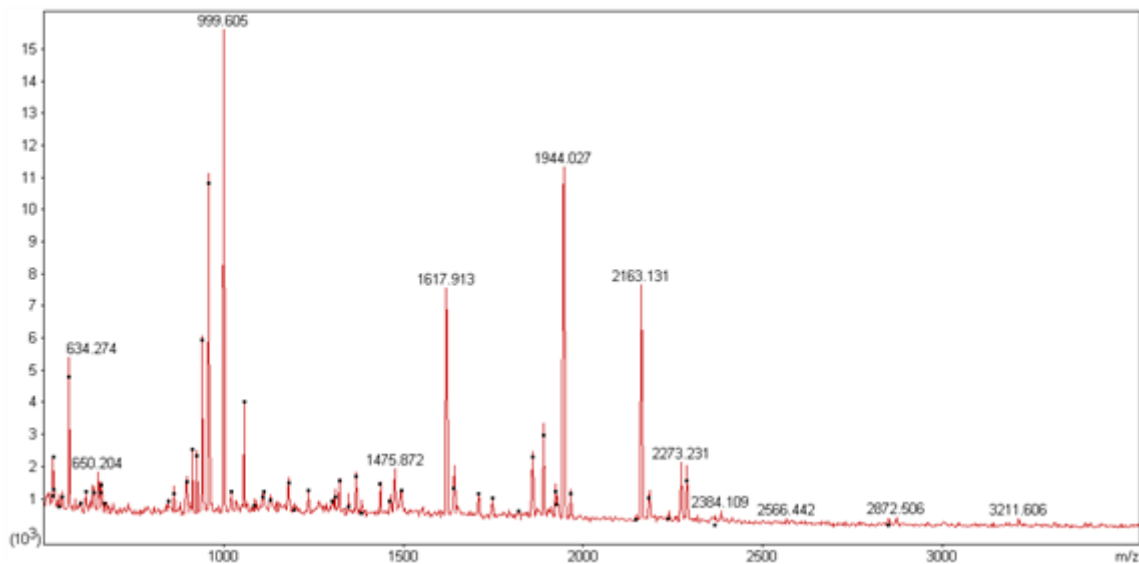

### Probability Based Mowse Score:

Protein score is  $-10 \cdot \log(P)$ , where P is the probability that the observed match is a random event. Protein scores greater than 75 are significant ( $p < 0.05$ ).

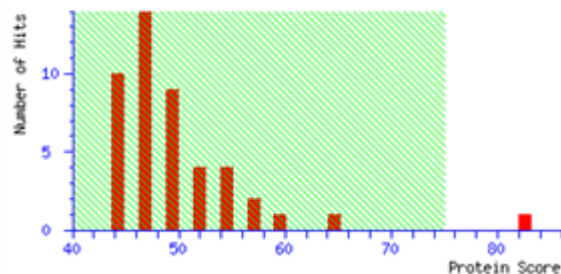

Matched peptide sequences: shown in **Bold Red**

1 **MAS**NLYPHRG **FMLD**TGR**KFF** **PVK**AILHLLT LLHQYNFNVF HWHIYDAESF  
 51 PLLWPAGEGL TNASVKYSQT HTYYTPSDIQ NVISYAENLG ILVYPETDMP  
 101 GHSDIWIWIK KDLVVGKASL **KKPD**AQLDIR **QNNKQVYDYI** RSLVSTVDGY  
 151 FGSPYHHFGG DEVAYMWNTR DDNKLFSFL **NWLKTLTPKK** **SVILWDDPLT**  
 201 **DSEK**SITLSE **DWIIQ**TWHKG TTQKILKKGH **RVIV**ESDTF YIGNADADKI  
 251 **SSFV**FPKSSK VLGFEVAWFT SQDDDPDLD QDWIIDPLKA ASKIRRK

Matched peptides information:

| Start | End | Observed  | Mr(expt)  | Mr(calc)  | ppm  | M | Peptide                       |
|-------|-----|-----------|-----------|-----------|------|---|-------------------------------|
| 1     | 17  | 1966.0669 | 1965.0596 | 1964.9349 | 63.5 | 1 | -MASNLYPHRGFMLDTGR.K          |
| 10    | 17  | 896.5097  | 895.5025  | 895.4222  | 89.6 | 0 | R.GFMLDTGR.K                  |
| 10    | 17  | 912.4974  | 911.4901  | 911.4171  | 80.1 | 0 | R.GFMLDTGR.K + Oxidation (O)  |
| 19    | 23  | 637.4001  | 636.3928  | 636.3635  | 46.0 | 0 | K.FFPVK.A                     |
| 122   | 130 | 1055.6778 | 1054.6705 | 1054.5771 | 88.6 | 0 | K.KPDQLDIR.Q                  |
| 135   | 141 | 956.5820  | 955.5747  | 955.4763  | 103  | 0 | K.QVVDYIR.S                   |
| 190   | 204 | 1745.9789 | 1744.9716 | 1744.8883 | 47.7 | 1 | K.SVILWDDPLTDSEK.S            |
| 191   | 204 | 1617.9132 | 1616.9059 | 1616.7934 | 69.6 | 0 | K.SVILWDDPLTDSEK.S            |
| 205   | 219 | 1857.0505 | 1856.0432 | 1855.9468 | 51.9 | 0 | K.SITLSEDWIIQWHK.G            |
| 232   | 249 | 1944.0272 | 1943.0199 | 1942.9160 | 53.5 | 0 | R.VIVSEDTFYIGNADADK.I         |
| 232   | 257 | 2849.5086 | 2848.5013 | 2848.4171 | 29.6 | 1 | R.VIVSEDTFYIGNADADKISSFVFPK.S |
| 250   | 257 | 924.5977  | 923.5904  | 923.5117  | 85.2 | 0 | K.ISSFVFPK.S                  |

Spot No.: **99**

Mascot score: **83**

Species: *Fusarium oxysporum f. sp. cubense race 4*

Protein name: **Glucose-6-phosphate 1-epimerase**

NCBI accession No.: **gi| 475666766**      Sequence coverage %: **46**

Matched peptides No.: **10**      Total peptides No.: **60**

Calculated Mr: **33685**      Calculated pI: **4.95**

### Annotated PMF spectra:

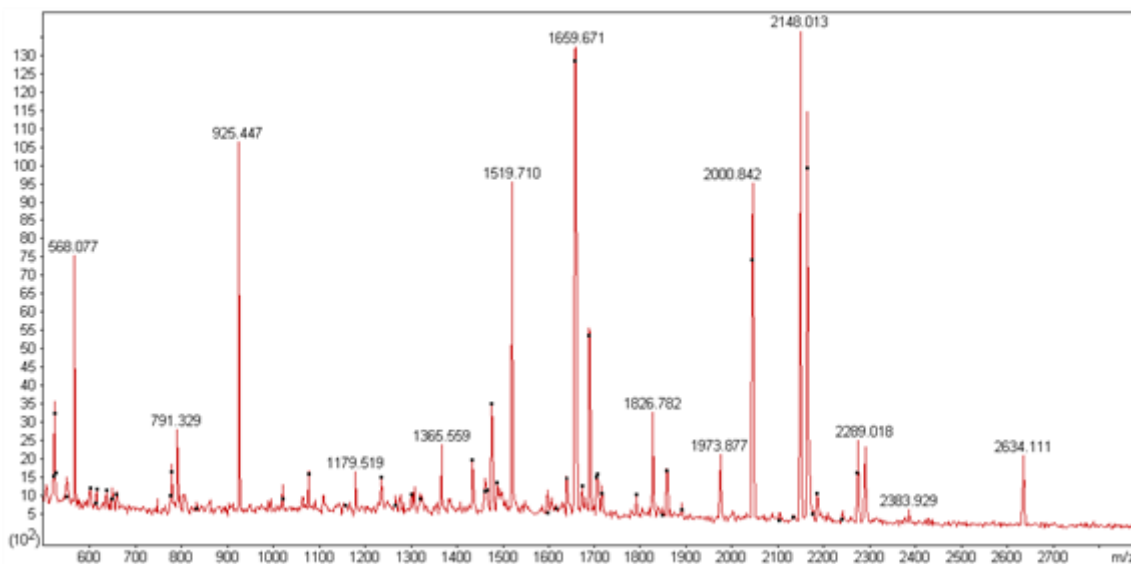

### Probability Based Mowse Score:

Protein score is  $-10 \cdot \log(P)$ , where P is the probability that the observed match is a random event. Protein scores greater than 75 are significant ( $p < 0.05$ ).

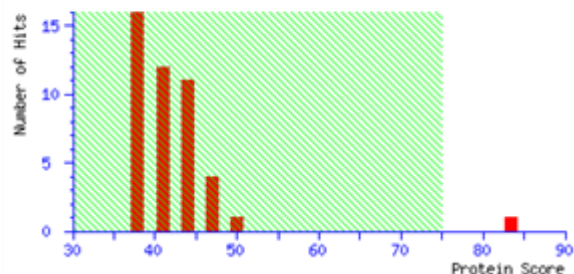

Matched peptide sequences: shown in **Bold Red**

```

1  MVDRPNKPSA LASTPAAPPQ PAVDITHDNS RVKAVLPTGE SVEVLLHGAT
51 VISWKDASGA EKLWSESAA LDGSAPVRGG IPIVFPVFGT APDHEPVAKL
101 PQHGFARNSR WEFLGKSTSE GSSSSVKLDF GLSSESISDD FKALWPYKFA
151 LIYSVSLDPE SLNTTIIVVTN DGDIAFDQFQT LLHTYFKISD ISSAEVTGLE
201 DSVYFSKVSS SEATQSGAIT FSAETDSVYT PAKGPSHPVV ISESGTPRFR
251 IVRDNLQVV VWNPWVDKSA GIKDFTPKDG WKNMLCVEPG SVKGWQKLEK
301 GDAFEAAQTI TLV

```

Matched peptides information:

| Start - End | Observed  | Mr (expt) | Mr (calc) | ppm   | M | Peptide                        |
|-------------|-----------|-----------|-----------|-------|---|--------------------------------|
| 63 - 78     | 1657.7545 | 1656.7472 | 1656.8471 | -60.3 | 0 | K.LWVSESAAALDGSAPVR.G          |
| 79 - 99     | 2148.0129 | 2147.0056 | 2147.1416 | -63.3 | 0 | R.GGIPIVFPVFGTAPDHEPVAK.L      |
| 100 - 107   | 925.4469  | 924.4397  | 924.4930  | -57.7 | 0 | K.LPQHGFAR.N                   |
| 111 - 116   | 779.3233  | 778.3160  | 778.4014  | -110  | 0 | R.WEFLGK.S                     |
| 128 - 142   | 1659.6711 | 1658.6638 | 1658.7675 | -62.5 | 0 | K.LDFGLSSESISDDPK.A            |
| 143 - 148   | 777.3251  | 776.3178  | 776.4221  | -134  | 0 | K.ALWPYK.F                     |
| 208 - 233   | 2634.1111 | 2633.1038 | 2633.2344 | -49.6 | 0 | K.VSSSEATQSGAITFSAETDSVYTPAK.G |
| 234 - 248   | 1519.7096 | 1518.7023 | 1518.7791 | -50.5 | 0 | K.GPSHPVVISGOTFR.F             |
| 254 - 268   | 1826.7824 | 1825.7751 | 1825.8999 | -68.3 | 0 | R.DNLQVVVWNPWVDK.S             |
| 298 - 313   | 1705.7509 | 1704.7436 | 1704.8934 | -87.9 | 1 | K.LEKGDFAEAAQTITLV.-           |
